# Supplementary material for: One potential biomarker for teratozoospermia identified by in-depth integrative analysis of multiple microarray data
Source: Aging (Albany NY). 2021 Mar 26;13(7):10208–24. doi: 10.18632/aging.202781 (PMC8064145; doi:10.18632/aging.202781)
Supplement: Supplementary Table 1 [file aging-13-202781-s002.xls]

## Sheet: GSE6872
Supplementary Table 1. Summary table of all mRNAs from three datasets.
	logFC	AveExpr	t	P.Value	adj.P.Val	B	symbols	EntrezID
204712_at	5.0375	5.49916	35.4352	2.26562e-20	8.25545e-16	35.7785	WIF1	11197
234949_at	5.83985	6.85031	33.8699	5.81655e-20	8.25545e-16	34.98	FRG1BP	284802
243666_at	5.62293	5.18617	33.8089	6.03965e-20	8.25545e-16	34.9479	CELF4	56853
237802_at	6.90784	6.54289	31.5132	2.61222e-19	2.61224e-15	33.6812	XKR4	114786
200002_at	-5.3939	7.65024	-30.5374	5.02253e-19	3.05119e-15	33.1063	RPL35	11224
1554816_at	4.26673	4.89276	30.0063	7.23016e-19	3.38007e-15	32.7836	ASTN2	23245
200963_x_at	-4.13117	9.49503	-28.8519	1.63096e-18	6.85943e-15	32.0569	RPL31	6160
1557374_at	4.55434	5.52133	28.1716	2.6733e-18	1.04402e-14	31.6117	ABCC9	10060
209224_s_at	-4.53685	6.70224	-27.7963	3.52793e-18	1.28593e-14	31.3605	NDUFA2	4695
226675_s_at	-6.16426	6.58724	-27.0089	6.38862e-18	1.94054e-14	30.8199	MALAT1	378938
200819_s_at	-4.24626	7.06422	-26.884	7.03026e-18	2.02305e-14	30.7324	RPS15	6209
200925_at	-4.07812	6.67553	-26.5533	9.07617e-18	2.36305e-14	30.4984	COX6A1	1337
200674_s_at	-3.69861	8.98298	-25.8623	1.56306e-17	3.67101e-14	29.9983	RPL32	6161
225190_x_at	-2.57501	8.68369	-25.5562	1.99735e-17	4.36821e-14	29.7717	RPL35A	6165
209167_at	2.33123	4.0386	25.2989	2.45978e-17	4.98106e-14	29.5788	GPM6B	2824
219985_at	4.19839	5.51995	24.8728	3.48773e-17	6.35639e-14	29.2544	HS3ST3A1	9955
242410_s_at	4.43757	4.48768	24.6671	4.13669e-17	7.29592e-14	29.0954	CACNA1E	777
200095_x_at	-3.77917	10.0847	-24.5578	4.53163e-17	7.73888e-14	29.0103	RPS10	6204
231640_at	5.06681	5.59813	24.4254	5.06335e-17	8.14232e-14	28.9067	ETFRF1	144363
215301_at	6.73337	6.62775	24.2135	6.05485e-17	9.45854e-14	28.7395	SYCE1L	100130958
240452_at	4.87417	10.3547	22.9839	1.76024e-16	2.36581e-13	27.7357	GSPT1	2935
1569652_at	5.07452	5.58214	22.6261	2.42511e-16	3.01839e-13	27.4324	MLLT3	4300
234314_at	4.00432	4.70387	22.5438	2.61244e-16	3.17412e-13	27.3619	RALGAPA2	57186
212716_s_at	-2.96587	5.71788	-22.5013	2.7151e-16	3.22714e-13	27.3253	EIF3K	27335
204102_s_at	-3.95559	7.00361	-22.3769	3.04011e-16	3.53656e-13	27.218	EEF2	1938
237510_at	4.74403	5.55773	22.0091	4.26201e-16	4.75562e-13	26.8967	MYNN	55892
207012_at	2.09199	3.95495	21.8717	4.84168e-16	5.09075e-13	26.7752	MMP16	4325
202029_x_at	-3.61581	9.28162	-21.781	5.26909e-16	5.43561e-13	26.6945	RPL38	6169
200061_s_at	-4.841	7.65144	-20.8875	1.23411e-15	1.12459e-12	25.8799	RPS24	6229
222073_at	6.04	6.30937	20.6768	1.51561e-15	1.31533e-12	25.6825	COL4A3	1285
200735_x_at	-4.30369	7.3134	-20.6424	1.56762e-15	1.31861e-12	25.65	NACA	4666
215554_at	5.93054	5.72546	20.5115	1.78318e-15	1.47721e-12	25.526	GPLD1	2822
231235_at	4.20682	4.99709	20.4482	1.89847e-15	1.50433e-12	25.4657	NKTR	4820
242344_at	2.9653	3.99645	20.2197	2.38289e-15	1.83499e-12	25.2466	GABRB2	2561
218226_s_at	-4.09727	6.60271	-20.1573	2.53675e-15	1.92635e-12	25.1862	NDUFB4	4710
220518_at	2.73782	4.36963	20.0216	2.90766e-15	2.14833e-12	25.0544	ABI3BP	25890
228690_s_at	-4.11452	6.81941	-19.9842	3.01955e-15	2.20126e-12	25.018	NDUFA11	126328
236761_at	3.72884	4.87087	19.8394	3.49715e-15	2.51588e-12	24.876	LHFPL3	375612
220184_at	4.23389	5.38883	19.7852	3.69559e-15	2.60992e-12	24.8226	NANOG	79923
209058_at	-2.99915	6.49275	-19.7779	3.72334e-15	2.60992e-12	24.8153	EDF1	8721
215321_at	4.62679	5.42298	19.5929	4.50025e-15	3.06355e-12	24.6318	RUNDC3B	154661
217801_at	-3.44974	5.7979	-19.5847	4.53859e-15	3.06355e-12	24.6236	ATP5F1E	514
202077_at	-3.61067	6.65603	-19.5213	4.84471e-15	3.2303e-12	24.5603	NDUFAB1	4706
1562527_at	3.29554	4.33616	19.4585	5.16987e-15	3.40557e-12	24.4974	LOC441666	441666
200818_at	-4.86039	7.09992	-19.3727	5.65135e-15	3.63515e-12	24.411	ATP5PO	539
226006_at	-2.97905	6.19205	-19.3517	5.77614e-15	3.67221e-12	24.3898	PET100	100131801
237339_at	1.38378	4.80115	19.2348	6.5251e-15	4.10069e-12	24.2714	LINC00993	101929520
200024_at	-2.48559	6.73865	-19.132	7.26787e-15	4.51557e-12	24.1666	RPS5	6193
233437_at	2.26293	5.07693	19.0766	7.70385e-15	4.73267e-12	24.11	GABRA4	2557
200017_at	-3.19106	7.8439	-19.066	7.79074e-15	4.73288e-12	24.0991	RPS27A	6233
241392_at	2.67637	6.43643	19.0542	7.88793e-15	4.73926e-12	24.087	TMEM39A	55254
212417_at	3.69291	4.46355	18.9519	8.78904e-15	5.11213e-12	23.9818	SCAMP1	9522
200741_s_at	-4.01912	9.53293	-18.9217	9.07569e-15	5.16889e-12	23.9506	RPS27	6232
222850_s_at	3.12864	4.30239	18.8333	9.97047e-15	5.56261e-12	23.859	DNAJB14	79982
220405_at	1.96582	3.87605	18.7564	1.08234e-14	5.86417e-12	23.7791	SNTG1	54212
231213_at	5.04495	5.08557	18.7556	1.08328e-14	5.86417e-12	23.7782	PDE1A	5136
200005_at	-2.7395	6.19715	-18.6686	1.18919e-14	6.31254e-12	23.6873	EIF3D	8664
200936_at	-3.90273	8.06706	-18.6549	1.20683e-14	6.34457e-12	23.673	RPL8	6132
243706_at	4.3397	7.01902	18.6181	1.25566e-14	6.4767e-12	23.6343	CDO1	1036
216947_at	2.81293	4.27143	18.5276	1.3845e-14	7.00904e-12	23.539	DES	1674
204072_s_at	4.43331	5.47153	18.4626	1.48539e-14	7.38305e-12	23.4704	FRY	10129
211047_x_at	-1.75843	6.46391	-18.361	1.65899e-14	8.0987e-12	23.3624	AP2S1	1175
1557246_at	3.59131	6.3639	18.3347	1.70739e-14	8.18875e-12	23.3343	KIDINS220	57498
238295_at	4.07283	6.15776	18.2839	1.80471e-14	8.50628e-12	23.2802	TEFM	79736
213414_s_at	-3.32181	7.24678	-18.1346	2.12638e-14	9.76973e-12	23.1198	RPS19	6223
1552582_at	4.70528	5.17616	18.0189	2.41645e-14	1.101e-11	22.9947	ABCC13	150000
237954_x_at	2.67309	4.47028	17.9843	2.51102e-14	1.12533e-11	22.9571	ARHGEF40	55701
236837_x_at	3.73196	4.25565	17.9732	2.54242e-14	1.13014e-11	22.9449	MIPEPP3	650794
200029_at	-3.43092	6.71383	-17.8612	2.88029e-14	1.24984e-11	22.8227	RPL19	6143
239018_at	2.6429	5.86235	17.7667	3.20171e-14	1.37012e-11	22.719	DNAJC30	84277
220122_at	3.30827	5.09079	17.7431	3.2877e-14	1.39345e-11	22.693	MCTP1	79772
208826_x_at	-2.60089	7.78929	-17.7326	3.32673e-14	1.39915e-11	22.6814	HINT1	3094
232945_at	3.99976	4.37488	17.6094	3.8227e-14	1.57148e-11	22.5451	PUS10	150962
228301_x_at	-1.78932	6.43166	-17.5518	4.08052e-14	1.66494e-11	22.481	NDUFB10	4716
239340_at	3.21944	4.68752	17.5281	4.19174e-14	1.68564e-11	22.4546	ZNF536	9745
200013_at	-3.4919	6.84236	-17.5279	4.19291e-14	1.68564e-11	22.4544	RPL24	6152
243109_at	3.16938	4.48643	17.4893	4.38063e-14	1.74825e-11	22.4114	MCTP2	55784
227014_at	2.00842	5.329	17.4789	4.43301e-14	1.75634e-11	22.3997	ASPHD2	57168
224719_s_at	-3.6444	6.43389	-17.3698	5.02118e-14	1.96095e-11	22.2773	C12orf57	113246
225698_at	-4.20972	7.19845	-17.3583	5.08753e-14	1.97277e-11	22.2644	EPB41L4A-AS1	114915
240863_at	3.83128	4.26021	17.3505	5.13359e-14	1.97661e-11	22.2555	CYP19A1	1588
205609_at	3.23306	4.52912	17.3347	5.22729e-14	1.98474e-11	22.2377	ANGPT1	284
215611_at	2.51796	5.00646	17.3169	5.33505e-14	2.01168e-11	22.2177	TCF12	6938
201258_at	-4.48676	6.5193	-17.3107	5.37345e-14	2.01228e-11	22.2106	RPS16	6217
212788_x_at	-4.35818	7.28172	-17.279	5.57284e-14	2.07275e-11	22.1748	FTL	2512
47571_at	1.43643	5.56158	17.2112	6.02567e-14	2.2111e-11	22.098	ZNF236	7776
226296_s_at	-5.12132	8.16298	-17.1709	6.31256e-14	2.28569e-11	22.0522	MRPS15	64960
228040_at	4.98441	8.4468	17.0514	7.25118e-14	2.55779e-11	21.9158	GLIDR	389741
235859_at	1.4753	4.63976	17.0438	7.31586e-14	2.56407e-11	21.907	KMT2C	58508
1569495_at	3.04658	4.98479	17.014	7.57392e-14	2.60631e-11	21.8729	SCLT1	132320
1570007_at	2.60512	8.36421	17.0137	7.5767e-14	2.60631e-11	21.8725	LRRC8C	84230
219304_s_at	4.82541	5.97163	17.0134	7.5794e-14	2.60631e-11	21.8722	PDGFD	80310
1556203_a_at	3.46074	5.31465	16.8748	8.91411e-14	3.0272e-11	21.7124	SRGAP2	23380
229398_at	2.39301	4.65221	16.8433	9.25017e-14	3.10278e-11	21.6759	RAB18	22931
224588_at	2.28663	5.74529	16.8284	9.41318e-14	3.13821e-11	21.6587	XIST	7503
1569713_at	1.59776	4.45294	16.7927	9.81766e-14	3.23362e-11	21.6172	SEC24B-AS1	100533182
213588_x_at	-3.48248	9.3616	-16.7548	1.02671e-13	3.35138e-11	21.573	RPL14	9045
231860_at	2.82158	5.46246	16.7523	1.02978e-13	3.35138e-11	21.5701	BRWD1	54014
1569484_s_at	3.04386	4.57544	16.7325	1.05416e-13	3.39036e-11	21.547	MDN1	23195
1555950_a_at	-3.38227	6.74492	-16.5549	1.30178e-13	4.09051e-11	21.3388	CD55	1604
213307_at	3.92651	7.17168	16.527	1.34592e-13	4.20505e-11	21.3058	SHANK2	22941
214920_at	2.19269	4.34318	16.4771	1.42871e-13	4.41014e-11	21.2469	THSD7A	221981
239999_at	3.36656	4.54059	16.473	1.43577e-13	4.41014e-11	21.242	MIR99AHG	388815
242555_at	3.0107	4.20718	16.4351	1.50263e-13	4.58973e-11	21.197	C16orf87	388272
241291_at	2.90328	3.89873	16.4208	1.52872e-13	4.64349e-11	21.18	LINC01541	100505776
202090_s_at	-3.05683	6.00621	-16.3929	1.58092e-13	4.71157e-11	21.1468	UQCR11	10975
1562790_at	1.17515	3.69197	16.3858	1.59442e-13	4.71157e-11	21.1384	NCALD	83988
244822_at	2.76293	4.54499	16.3842	1.59755e-13	4.71157e-11	21.1365	GART	2618
203478_at	-4.03216	7.6545	-16.3825	1.60079e-13	4.71157e-11	21.1345	NDUFC1	4717
206158_s_at	-4.1599	6.73288	-16.3756	1.61416e-13	4.71948e-11	21.1263	CNBP	7555
1564323_at	3.04635	5.24344	16.2946	1.77999e-13	5.17663e-11	21.0296	LINC02023	101928405
203663_s_at	-3.78169	6.92304	-16.2532	1.87156e-13	5.38566e-11	20.98	COX5A	9377
229116_at	2.60711	4.29017	16.0644	2.35598e-13	6.57209e-11	20.7522	CNKSR2	22866
215992_s_at	3.55679	5.00552	16.0466	2.40776e-13	6.68245e-11	20.7307	RAPGEF2	9693
238478_at	2.89632	5.26318	15.9311	2.7754e-13	7.47512e-11	20.5899	BNC2	54796
206928_at	1.4879	3.84596	15.9038	2.87054e-13	7.68829e-11	20.5565	ZNF124	7678
200926_at	-4.38598	8.15319	-15.9004	2.88267e-13	7.68829e-11	20.5523	RPS23	6228
1569815_x_at	2.89041	5.42169	15.8459	3.0837e-13	8.10348e-11	20.4855	STRN	6801
232382_s_at	5.34259	7.30663	15.7816	3.3401e-13	8.64205e-11	20.4063	PCMTD1	115294
1552695_a_at	1.74969	4.66801	15.7626	3.41974e-13	8.64205e-11	20.3829	SLC2A13	114134
208692_at	-4.8253	9.24351	-15.7571	3.44336e-13	8.64205e-11	20.3761	RPS3	6188
1559369_at	2.06078	3.97396	15.753	3.46084e-13	8.64205e-11	20.3711	TRAPPC13	80006
238840_at	2.56217	4.91234	15.7529	3.46156e-13	8.64205e-11	20.3709	LRRFIP1	9208
225655_at	2.788	5.78399	15.7211	3.60163e-13	8.91036e-11	20.3315	UHRF1	29128
1556606_at	1.93321	5.17789	15.6967	3.71291e-13	9.1179e-11	20.3014	NAV2	89797
212581_x_at	-2.64441	7.97716	-15.6943	3.7239e-13	9.1179e-11	20.2984	GAPDH	2597
1558982_at	2.27959	5.31726	15.689	3.74868e-13	9.1179e-11	20.2918	ANKRD20A12P	100874392
206442_at	-8.07361	9.25931	-15.6847	3.7689e-13	9.1179e-11	20.2865	SEMG1	6406
221475_s_at	-4.31736	9.10789	-15.5883	4.25286e-13	1.013e-10	20.1666	RPL15	6138
214317_x_at	-1.96381	7.86799	-15.5867	4.26137e-13	1.013e-10	20.1646	RPS9	6203
229905_at	3.92236	7.19928	15.577	4.31373e-13	1.02101e-10	20.1525	RAP1GDS1	5910
237828_at	1.99817	4.90449	15.5513	4.45568e-13	1.04556e-10	20.1204	SRRM4	84530
235369_at	3.29538	5.65149	15.5331	4.55906e-13	1.06497e-10	20.0976	C14orf28	122525
201953_at	-3.85366	7.21826	-15.5135	4.67305e-13	1.08262e-10	20.0731	CIB1	10519
211474_s_at	-3.45776	7.30115	-15.4958	4.77855e-13	1.10239e-10	20.0509	SERPINB6	5269
224169_at	1.99416	4.55168	15.4696	4.93975e-13	1.13479e-10	20.0179	NPFFR2	10886
240062_at	2.52612	3.91859	15.4621	4.98654e-13	1.14075e-10	20.0086	FAM3C	10447
207585_s_at	-3.85458	6.8103	-15.4567	5.02105e-13	1.14386e-10	20.0017	RPL36AL	6166
227003_at	-4.36736	6.03562	-15.4471	5.08236e-13	1.15235e-10	19.9897	RAB28	9364
219250_s_at	1.6648	4.03665	15.4027	5.37702e-13	1.2073e-10	19.9337	FLRT3	23767
215228_at	1.48773	4.09762	15.4011	5.38786e-13	1.2073e-10	19.9317	NHLH2	4808
201338_x_at	-2.43893	6.71491	-15.3778	5.54946e-13	1.23844e-10	19.9023	GTF3A	2971
211285_s_at	-3.04106	8.23018	-15.31	6.05045e-13	1.32855e-10	19.8164	UBE3A	7337
203569_s_at	-2.62315	8.24006	-15.281	6.27872e-13	1.36226e-10	19.7796	OFD1	8481
208746_x_at	-3.17472	6.82506	-15.2472	6.55559e-13	1.40526e-10	19.7367	ATP5MG	10632
239757_at	2.88678	6.30947	15.2444	6.57972e-13	1.40526e-10	19.733	ZFAND6	54469
217491_x_at	-2.88439	8.43997	-15.2404	6.61321e-13	1.40692e-10	19.728	COX7C	1350
1568970_at	1.78841	4.16252	15.2323	6.68223e-13	1.41609e-10	19.7177	ADAM18	8749
222609_s_at	-2.39431	6.42642	-15.1602	7.33001e-13	1.52383e-10	19.6256	EXOSC1	51013
201942_s_at	-2.74721	5.92529	-15.1362	7.56079e-13	1.56586e-10	19.5948	CPD	1362
1559585_at	1.61755	4.99312	15.1202	7.71835e-13	1.58647e-10	19.5743	DDX60L	91351
1553873_at	3.86322	4.59492	15.102	7.90079e-13	1.61789e-10	19.551	KLHL34	257240
201441_at	-3.13244	7.23813	-15.0683	8.25293e-13	1.68369e-10	19.5076	COX6B1	1340
213491_x_at	-2.50281	7.00391	-15.0613	8.32758e-13	1.6926e-10	19.4987	RPN2	6185
215311_at	4.51859	7.05973	15.0464	8.49063e-13	1.71301e-10	19.4794	NTRK3	4916
200027_at	-3.65522	8.0589	-15.0265	8.71128e-13	1.75106e-10	19.4538	NARS	4677
220316_at	1.80795	4.45504	14.9663	9.42042e-13	1.84914e-10	19.3759	NPAS3	64067
229491_at	1.80181	5.38557	14.9595	9.50359e-13	1.84914e-10	19.3671	SLC9B2	133308
208771_s_at	-3.14086	8.67429	-14.9563	9.54296e-13	1.85022e-10	19.363	LTA4H	4048
200844_s_at	-2.1099	7.11218	-14.9244	9.94796e-13	1.91516e-10	19.3216	PRDX6	9588
1557578_at	4.10563	6.73253	14.8927	1.03685e-12	1.97753e-10	19.2804	PHLDB2	90102
214596_at	3.80118	6.51718	14.8918	1.03804e-12	1.97753e-10	19.2792	CHRM3	1131
208679_s_at	-3.65105	7.98099	-14.8806	1.05339e-12	1.99826e-10	19.2646	ARPC2	10109
222411_s_at	-2.98103	6.66245	-14.8732	1.06355e-12	1.99826e-10	19.2551	SSR3	6747
1553412_at	4.03183	5.81891	14.8332	1.12074e-12	2.09134e-10	19.2029	AGBL4	84871
232904_at	1.63988	4.20735	14.8157	1.14675e-12	2.12538e-10	19.18	SLC7A14	57709
1569935_at	1.90286	7.09619	14.7962	1.17646e-12	2.16575e-10	19.1545	ZNF664	144348
200853_at	-3.33511	7.04926	-14.7935	1.18066e-12	2.16619e-10	19.151	H2AFZ	3015
48030_i_at	1.74635	9.27466	14.7061	1.32472e-12	2.3833e-10	19.0362	FAXDC2	10826
238579_at	1.09956	5.18673	14.6807	1.36977e-12	2.45549e-10	19.0028	C9orf85	138241
238360_s_at	3.6718	6.17552	14.6773	1.37602e-12	2.45862e-10	18.9983	LINC00672	100505576
215513_at	3.10042	6.11529	14.6728	1.3842e-12	2.46518e-10	18.9924	HYMAI	57061
217773_s_at	-3.87461	7.72015	-14.6636	1.4012e-12	2.48177e-10	18.9802	NDUFA4	4697
212936_at	3.82025	6.82628	14.6628	1.40259e-12	2.48177e-10	18.9792	FAM172A	83989
212857_x_at	-3.48918	6.42936	-14.6338	1.45761e-12	2.56254e-10	18.9409	SUB1	10923
206104_at	3.50892	8.6171	14.615	1.49439e-12	2.6035e-10	18.916	ISL1	3670
243008_at	2.95097	4.53744	14.5974	1.52961e-12	2.62992e-10	18.8928	RHEB	6009
1564637_a_at	4.25962	5.51339	14.5939	1.5368e-12	2.63401e-10	18.8881	FAM98B	283742
225036_at	-3.45505	6.69082	-14.5567	1.61464e-12	2.75206e-10	18.8388	TOMM5	401505
236394_at	2.39358	5.91084	14.5562	1.61575e-12	2.75206e-10	18.8381	A2MP1	3
237210_at	2.14705	4.66006	14.5376	1.65625e-12	2.81228e-10	18.8134	NFRKB	4798
218100_s_at	-4.96061	8.01962	-14.526	1.6822e-12	2.84751e-10	18.7979	IFT57	55081
213062_at	-2.68291	6.31693	-14.5011	1.73884e-12	2.91628e-10	18.7648	NTAN1	123803
217719_at	-3.6567	8.74579	-14.4328	1.90526e-12	3.18563e-10	18.6736	EIF3L	51386
228579_at	1.12751	6.29181	14.3881	2.02296e-12	3.35168e-10	18.6137	KCNQ3	3786
205529_s_at	4.45811	7.00104	14.3727	2.06527e-12	3.41035e-10	18.5931	RUNX1T1	862
211939_x_at	-3.14586	6.61259	-14.3707	2.07085e-12	3.41035e-10	18.5904	BTF3	689
1553179_at	1.56721	4.34818	14.3463	2.14006e-12	3.50938e-10	18.5575	ADAMTS19	171019
231040_at	2.56954	4.92724	14.3181	2.22287e-12	3.59572e-10	18.5196	RORB	6096
227136_s_at	1.0056	3.56361	14.3097	2.24828e-12	3.6261e-10	18.5083	CACUL1	143384
208241_at	1.87655	5.05763	14.2894	2.31084e-12	3.6927e-10	18.4808	NRG1	3084
218662_s_at	-2.84285	5.34079	-14.2774	2.34852e-12	3.73272e-10	18.4647	NCAPG	64151
200023_s_at	-4.11826	6.83973	-14.273	2.36275e-12	3.74445e-10	18.4586	EIF3F	8665
1554140_at	-4.89259	6.57381	-14.2687	2.37642e-12	3.74961e-10	18.4529	WDR78	79819
201094_at	-3.4069	10.1221	-14.2451	2.45357e-12	3.84381e-10	18.421	RPS29	6235
1569894_at	2.76895	4.2182	14.1619	2.74708e-12	4.26696e-10	18.308	PPP2R3C	55012
225245_x_at	-3.86964	7.9639	-14.128	2.87711e-12	4.44368e-10	18.2618	H2AFJ	55766
202605_at	-1.9363	5.81795	-14.1186	2.91418e-12	4.47564e-10	18.249	GUSB	2990
239840_at	2.60378	5.13996	14.0799	3.07227e-12	4.66188e-10	18.1962	TMEM161B-AS1	100505894
228825_at	2.60891	6.74479	14.0767	3.08592e-12	4.66188e-10	18.1917	PTGR1	22949
201592_at	-3.55985	7.17629	-14.067	3.12697e-12	4.6969e-10	18.1785	EIF3H	8667
215963_x_at	-2.41512	7.94375	-14.0528	3.18864e-12	4.75038e-10	18.159	RPL3	6122
230608_at	-4.14569	10.2005	-14.0142	3.36164e-12	4.9675e-10	18.1061	TSACC	128229
230040_at	3.86128	6.19536	14.0103	3.38009e-12	4.9813e-10	18.1007	ADAMTS18	170692
218740_s_at	-2.16166	6.14804	-14.0045	3.40684e-12	5.00384e-10	18.0928	CDK5RAP3	80279
1570155_at	1.6746	5.57585	14.0031	3.41368e-12	5.00384e-10	18.0908	LINC01111	101926978
225610_at	-2.88362	7.53574	-13.9897	3.47685e-12	5.08281e-10	18.0724	UHRF2	115426
200717_x_at	-2.41095	11.4335	-13.9219	3.81724e-12	5.4923e-10	17.979	RPL7	6129
201429_s_at	-4.68442	11.2296	-13.9057	3.90355e-12	5.55798e-10	17.9566	RPL37A	6168
211609_x_at	-2.27398	7.14451	-13.9001	3.93413e-12	5.5725e-10	17.9488	PSMD4	5710
202655_at	-1.51124	6.82961	-13.8638	4.13649e-12	5.82893e-10	17.8986	MANF	7873
225552_x_at	-3.51793	7.24733	-13.8607	4.15439e-12	5.8391e-10	17.8943	AURKAIP1	54998
200750_s_at	-4.04479	6.15735	-13.8194	4.39962e-12	6.12084e-10	17.8368	RAN	5901
1557586_s_at	2.16126	6.09536	13.8087	4.46499e-12	6.1882e-10	17.8221	ATP6V1H	51606
209104_s_at	-2.29985	7.03255	-13.8054	4.48555e-12	6.19312e-10	17.8175	NHP2	55651
1560751_at	1.92947	4.75838	13.7941	4.55676e-12	6.27558e-10	17.8017	AQP4-AS1	147429
200026_at	-2.83048	9.51499	-13.7271	5.00304e-12	6.84489e-10	17.7081	RPL34	6164
217836_s_at	-2.71177	6.70454	-13.7242	5.02289e-12	6.84854e-10	17.7042	YY1AP1	55249
214271_x_at	-2.78553	8.73086	-13.7025	5.17742e-12	7.02421e-10	17.6738	RPL12	6136
1561442_at	1.48374	3.56898	13.6826	5.3242e-12	7.16997e-10	17.6458	LINC01148	283585
215691_x_at	-3.09947	6.77098	-13.6789	5.35138e-12	7.18887e-10	17.6407	HSPB11	51668
204348_s_at	1.3213	6.52103	13.6636	5.46787e-12	7.32735e-10	17.6191	AK4	205
210739_x_at	1.69174	5.21835	13.6559	5.52684e-12	7.37024e-10	17.6084	SLC4A4	8671
237759_at	1.80043	5.13878	13.6506	5.56842e-12	7.40763e-10	17.6009	CD48	962
204271_s_at	1.28736	5.30741	13.6469	5.59668e-12	7.42714e-10	17.5958	EDNRB	1910
204913_s_at	2.26172	4.26725	13.6252	5.77036e-12	7.59787e-10	17.5652	SOX11	6664
224409_s_at	-2.31232	7.40409	-13.625	5.77152e-12	7.59787e-10	17.565	TSSK6	83983
228603_at	2.95749	5.47805	13.6239	5.78091e-12	7.59787e-10	17.5633	ACTR3	10096
1554601_at	3.03032	4.40951	13.6033	5.95065e-12	7.8022e-10	17.5343	NKAIN2	154215
201114_x_at	-2.68452	6.43665	-13.5956	6.01542e-12	7.86825e-10	17.5235	PSMA7	5688
216877_at	1.94335	4.42857	13.5699	6.23716e-12	8.11945e-10	17.4872	LOC100505498	100505498
200092_s_at	-3.53095	9.80482	-13.5668	6.26414e-12	8.1352e-10	17.4829	RPL37	6167
200629_at	-2.76594	7.44421	-13.5168	6.72279e-12	8.64867e-10	17.4121	WARS	7453
200034_s_at	-3.47269	6.72032	-13.4846	7.03588e-12	8.98801e-10	17.3664	RPL6	6128
201527_at	-2.17981	8.01965	-13.4826	7.05564e-12	8.99224e-10	17.3636	ATP6V1F	9296
209389_x_at	-3.99787	7.10183	-13.474	7.14212e-12	9.08129e-10	17.3514	DBI	1622
225452_at	2.02715	5.33252	13.4654	7.23026e-12	9.1508e-10	17.3391	MED1	5469
239942_at	1.36903	3.51012	13.4383	7.51328e-12	9.42175e-10	17.3006	GNG11	2791
208768_x_at	-3.30289	8.71379	-13.4358	7.54021e-12	9.4339e-10	17.297	RPL22	6146
200701_at	-3.07482	7.0974	-13.4296	7.60641e-12	9.49499e-10	17.2882	NPC2	10577
208726_s_at	-2.97367	5.98318	-13.4236	7.6719e-12	9.55492e-10	17.2796	EIF2S2	8894
1570542_a_at	2.01359	4.79339	13.3808	8.15379e-12	1.00182e-09	17.2185	PMPCB	9512
231106_at	1.79318	6.65412	13.3742	8.23122e-12	1.00906e-09	17.209	BMS1P2	642826
209969_s_at	-2.59095	6.5211	-13.2838	9.36653e-12	1.1284e-09	17.0794	STAT1	6772
222047_s_at	-3.41082	7.66074	-13.2716	9.532e-12	1.1404e-09	17.0618	SRRT	51593
213347_x_at	-4.43145	9.27397	-13.2624	9.65818e-12	1.15165e-09	17.0486	RPS4X	6191
206861_s_at	-2.3676	6.45202	-13.2489	9.84786e-12	1.16544e-09	17.0291	CGGBP1	8545
200761_s_at	-3.30597	7.33499	-13.241	9.96036e-12	1.17367e-09	17.0177	ARL6IP5	10550
225662_at	3.62725	6.62628	13.2161	1.03235e-11	1.21124e-09	16.9818	MAP3K20	51776
227765_at	-3.35594	8.3636	-13.1656	1.11029e-11	1.28435e-09	16.9087	OTUD6B-AS1	100506365
201573_s_at	-2.44995	7.22664	-13.1651	1.11111e-11	1.28435e-09	16.908	ETF1	2107
228731_at	3.04421	4.14921	13.1358	1.15914e-11	1.33143e-09	16.8655	GUCY1A2	2977
200873_s_at	-3.08022	6.8338	-13.1254	1.17663e-11	1.34586e-09	16.8504	CCT8	10694
200942_s_at	-3.6802	6.45177	-13.1193	1.18711e-11	1.35219e-09	16.8415	HSBP1	3281
200085_s_at	-3.50055	8.15596	-13.0982	1.22394e-11	1.38548e-09	16.8108	ELOB	6923
218679_s_at	-2.33342	5.51116	-13.0936	1.23215e-11	1.39189e-09	16.8041	VPS28	51160
207335_x_at	-2.004	6.60587	-13.0633	1.28746e-11	1.45137e-09	16.76	ATP5ME	521
233769_at	1.16604	4.70892	13.0461	1.32022e-11	1.47917e-09	16.7348	LOC284561	284561
218495_at	-2.56732	6.13605	-13.0279	1.35554e-11	1.50333e-09	16.7083	UXT	8409
244723_at	2.74039	4.66743	13.0261	1.35913e-11	1.50426e-09	16.7056	ACSM2A	123876
244121_at	2.72588	3.77045	12.991	1.43038e-11	1.57041e-09	16.6543	UBR3	130507
201390_s_at	-3.65971	7.77415	-12.9847	1.4436e-11	1.58174e-09	16.645	CSNK2B	1460
205353_s_at	-2.1311	6.20319	-12.9646	1.48671e-11	1.62194e-09	16.6155	PEBP1	5037
206061_s_at	3.70044	5.15206	12.9628	1.49055e-11	1.62194e-09	16.6129	DICER1	23405
213969_x_at	-2.21796	6.22737	-12.9621	1.49216e-11	1.62194e-09	16.6118	RPL29	6159
200025_s_at	-3.59073	9.52705	-12.9577	1.50164e-11	1.62901e-09	16.6054	RPL27	6155
216798_at	1.08488	3.61218	12.9317	1.5599e-11	1.68886e-09	16.5672	RNH1	6050
1568812_at	0.808701	4.81286	12.9075	1.61636e-11	1.74287e-09	16.5314	LINC01792	100507140
220995_at	1.29112	3.99942	12.9069	1.61764e-11	1.74287e-09	16.5306	STXBP6	29091
213726_x_at	-3.13833	7.45803	-12.9062	1.61935e-11	1.74287e-09	16.5296	TUBB4B	10383
210297_s_at	-4.66501	6.72491	-12.9032	1.62641e-11	1.74535e-09	16.5252	MSMB	4477
200010_at	-3.69091	6.89638	-12.8945	1.64742e-11	1.76267e-09	16.5123	RPL11	6135
219293_s_at	-3.42086	6.79985	-12.8882	1.66257e-11	1.77397e-09	16.5031	OLA1	29789
232034_at	3.69032	4.56274	12.8875	1.66447e-11	1.77397e-09	16.502	LINC00537	203274
223003_at	-1.89791	7.16499	-12.8689	1.71046e-11	1.81591e-09	16.4746	TRIR	79002
211682_x_at	2.00087	6.09731	12.8447	1.77254e-11	1.86015e-09	16.4387	UGT2B28	54490
226845_s_at	-1.90527	7.25656	-12.8426	1.77803e-11	1.86233e-09	16.4356	COPS9	150678
205156_s_at	0.892714	6.28484	12.8164	1.84785e-11	1.92049e-09	16.3969	ASIC1	41
201358_s_at	-4.00167	7.95369	-12.7975	1.90021e-11	1.96026e-09	16.3688	COPB1	1315
238886_at	3.14616	6.256	12.7873	1.92895e-11	1.9824e-09	16.3537	TMED10	10972
1562367_at	1.33487	3.88394	12.7861	1.93254e-11	1.9824e-09	16.3518	C15orf54	400360
214178_s_at	1.10162	4.66145	12.7736	1.96848e-11	2.01548e-09	16.3333	SOX2	6657
243799_x_at	2.37555	3.72464	12.7516	2.0337e-11	2.07449e-09	16.3005	ANGPTL3	27329
219498_s_at	1.23531	6.25139	12.7316	2.09488e-11	2.12896e-09	16.2707	BCL11A	53335
1553931_at	1.19992	3.46797	12.7037	2.18336e-11	2.2025e-09	16.2291	OSTCP1	202459
211720_x_at	-3.52295	8.78964	-12.7009	2.1923e-11	2.20744e-09	16.225	RPLP0	6175
239848_at	2.07735	4.17461	12.6431	2.38915e-11	2.39243e-09	16.1385	EIF3M	10480
208697_s_at	-3.16832	8.97681	-12.6411	2.39646e-11	2.39536e-09	16.1354	EIF3E	3646
202534_x_at	2.43178	6.70631	12.6323	2.42814e-11	2.41819e-09	16.1222	DHFR	1719
1559336_at	1.25281	3.41244	12.6165	2.48594e-11	2.4623e-09	16.0985	LOC101928505	101928505
241385_at	1.85889	5.90333	12.6046	2.53039e-11	2.49e-09	16.0807	LARP7	51574
202141_s_at	-3.6102	6.82972	-12.6042	2.53213e-11	2.49e-09	16.08	COPS8	10920
200893_at	-4.27099	7.39477	-12.5765	2.63915e-11	2.5864e-09	16.0384	TRA2B	6434
202209_at	-2.67697	7.40315	-12.5696	2.66664e-11	2.60676e-09	16.0279	LSM3	27258
239975_at	1.39655	3.90795	12.5687	2.66993e-11	2.60676e-09	16.0267	HLA-DPB2	3116
217883_at	-4.00131	7.83679	-12.5513	2.74071e-11	2.6711e-09	16.0003	MMADHC	27249
221474_at	-2.07877	8.4646	-12.537	2.79987e-11	2.72389e-09	15.9789	MYL12B	103910
202677_at	-2.25184	7.29401	-12.5356	2.80593e-11	2.72494e-09	15.9767	RASA1	5921
200860_s_at	-3.37657	8.26396	-12.5341	2.8122e-11	2.72619e-09	15.9744	CNOT1	23019
200786_at	-3.46142	7.32308	-12.5275	2.84023e-11	2.74299e-09	15.9644	PSMB7	5695
215468_at	1.62385	3.85815	12.5274	2.84049e-11	2.74299e-09	15.9644	LOC647070	647070
239049_at	2.61662	5.77235	12.5265	2.84458e-11	2.74299e-09	15.9629	CRIPT	9419
223295_s_at	-3.43827	6.39361	-12.5103	2.91467e-11	2.79531e-09	15.9384	LUC7L	55692
203621_at	-3.14276	7.09043	-12.5089	2.92079e-11	2.79531e-09	15.9363	NDUFB5	4711
240990_at	1.59005	3.75455	12.508	2.9244e-11	2.79531e-09	15.9351	RAB5A	5868
219738_s_at	2.45089	4.5961	12.5055	2.93537e-11	2.8009e-09	15.9313	PCDH9	5101
208398_s_at	-4.90616	7.36266	-12.5009	2.9558e-11	2.80644e-09	15.9243	TBPL1	9519
234594_at	1.56814	4.93779	12.5006	2.95707e-11	2.80644e-09	15.9239	ITPK1-AS1	319085
239580_at	2.33471	4.36645	12.4987	2.96559e-11	2.80644e-09	15.921	GUCY1A1	2982
1566889_at	2.09866	3.75836	12.4985	2.96684e-11	2.80644e-09	15.9205	THADA	63892
213697_at	1.39438	4.80724	12.4945	2.98444e-11	2.80851e-09	15.9146	HIPK3	10114
1570268_at	2.29545	3.71857	12.4907	3.00168e-11	2.81988e-09	15.9088	LOC101929210	101929210
242248_at	1.80842	3.57893	12.4757	3.07041e-11	2.86965e-09	15.886	PHKB	5257
240859_at	1.40458	3.99281	12.4646	3.12212e-11	2.90309e-09	15.8692	ZFYVE16	9765
238116_at	-5.48098	7.68326	-12.4274	3.30213e-11	3.04783e-09	15.8128	DYNLRB2	83657
212151_at	1.71695	7.2632	12.4267	3.30565e-11	3.04783e-09	15.8117	PBX1	5087
209350_s_at	-2.67082	6.7753	-12.3954	3.46605e-11	3.18498e-09	15.764	GPS2	2874
1565868_at	1.67677	5.2932	12.3857	3.51723e-11	3.22659e-09	15.7492	CD44	960
229563_s_at	-2.96406	11.2048	-12.3788	3.55425e-11	3.25508e-09	15.7387	RPL10A	4736
226024_at	-2.59405	6.31709	-12.3697	3.60322e-11	3.28588e-09	15.7249	COMMD1	150684
1563674_at	1.85031	5.55959	12.3681	3.61192e-11	3.28588e-09	15.7225	FCRL2	79368
201398_s_at	-3.56051	7.0768	-12.3638	3.63559e-11	3.30193e-09	15.7159	TRAM1	23471
210742_at	2.03338	4.88613	12.352	3.7015e-11	3.35065e-09	15.6978	CDC14A	8556
1554251_at	4.15264	6.34107	12.3505	3.71004e-11	3.35283e-09	15.6955	HP1BP3	50809
1564164_at	3.3343	5.55509	12.3403	3.76753e-11	3.39583e-09	15.68	DENND1B	163486
201575_at	-2.99849	6.70591	-12.3399	3.77004e-11	3.39583e-09	15.6793	SNW1	22938
1563018_at	1.37247	4.2256	12.3249	3.85699e-11	3.46274e-09	15.6563	TBX5	6910
229994_at	4.251	5.71085	12.3169	3.90392e-11	3.49841e-09	15.6441	NFIA	4774
1555071_at	1.66209	3.90579	12.316	3.90952e-11	3.49841e-09	15.6427	TLL1	7092
217269_s_at	0.711066	6.38083	12.2886	4.07595e-11	3.63545e-09	15.6007	TMPRSS15	5651
222992_s_at	-2.96814	8.16429	-12.2821	4.11657e-11	3.64581e-09	15.5907	NDUFB9	4715
206562_s_at	-2.78625	6.70343	-12.2727	4.17564e-11	3.68825e-09	15.5764	CSNK1A1	1452
238520_at	2.69622	4.20108	12.2598	4.25904e-11	3.74378e-09	15.5564	TRERF1	55809
214429_at	-2.94016	6.44397	-12.2501	4.32238e-11	3.77716e-09	15.5416	MTMR6	9107
1569318_at	1.5912	5.82728	12.2498	4.32466e-11	3.77716e-09	15.541	LINC00663	284440
200863_s_at	-2.49267	9.11173	-12.2433	4.36738e-11	3.80234e-09	15.5311	RAB11A	8766
1558732_at	3.04674	5.75086	12.2416	4.37876e-11	3.80618e-09	15.5285	MAP4K4	9448
214288_s_at	-3.28916	8.43726	-12.2321	4.44281e-11	3.84352e-09	15.5139	PSMB1	5689
1563316_at	1.8772	4.679	12.2239	4.499e-11	3.88598e-09	15.5012	NEGR1-IT1	100852409
201322_at	-2.73973	7.50916	-12.2146	4.56372e-11	3.93567e-09	15.4868	ATP5F1B	506
220551_at	2.05402	3.79135	12.2064	4.62085e-11	3.97866e-09	15.4743	SLC17A6	57084
200781_s_at	-3.06626	7.87429	-12.2038	4.63931e-11	3.98827e-09	15.4703	RPS15A	6210
243759_at	1.90829	4.60149	12.1925	4.72089e-11	4.04272e-09	15.4527	SCAF4	57466
226150_at	-2.91297	6.28911	-12.1919	4.72483e-11	4.04272e-09	15.4519	PLPP5	84513
219984_s_at	-4.16444	6.56161	-12.1887	4.74842e-11	4.05656e-09	15.4468	PLAAT1	57110
204763_s_at	2.8047	7.2391	12.1798	4.81362e-11	4.10585e-09	15.4331	GNAO1	2775
225794_s_at	-1.90016	7.48611	-12.177	4.83398e-11	4.11505e-09	15.4288	SMDT1	91689
243651_at	1.42837	6.18349	12.1744	4.85363e-11	4.11869e-09	15.4247	CPEB3	22849
209388_at	-3.22367	5.6751	-12.1715	4.87471e-11	4.12577e-09	15.4204	PAPOLA	10914
223636_at	-3.39685	6.97656	-12.1555	4.99662e-11	4.2094e-09	15.3955	ZMYND12	84217
242210_at	2.79278	5.44044	12.1393	5.1221e-11	4.29526e-09	15.3705	ZNF24	7572
1558348_at	2.01763	5.55628	12.1315	5.18405e-11	4.34055e-09	15.3584	DET1	55070
1555112_a_at	-3.55222	7.38398	-12.1304	5.19318e-11	4.34155e-09	15.3566	CCDC181	57821
243762_at	1.24616	5.58809	12.1165	5.30492e-11	4.42144e-09	15.3351	LINC01297	106146148
202447_at	-2.39094	7.00089	-12.113	5.33403e-11	4.43219e-09	15.3296	DECR1	1666
204616_at	-2.92507	5.24732	-12.1118	5.3436e-11	4.4334e-09	15.3278	UCHL3	7347
228396_at	1.03636	3.79343	12.0951	5.48335e-11	4.52873e-09	15.3018	PRKG1	5592
201991_s_at	-3.6162	7.94805	-12.0871	5.55101e-11	4.5708e-09	15.2894	KIF5B	3799
220663_at	3.51169	5.44288	12.071	5.69083e-11	4.66234e-09	15.2643	IL1RAPL1	11141
1552482_at	1.60287	4.31241	12.0588	5.79864e-11	4.71787e-09	15.2454	RAPH1	65059
233571_x_at	-3.01246	6.98134	-12.0544	5.83829e-11	4.74307e-09	15.2385	PPDPF	79144
209413_at	1.1556	6.93585	12.0292	6.07093e-11	4.92475e-09	15.1991	B4GALT2	8704
217769_s_at	-3.9883	8.87757	-12.0224	6.13502e-11	4.96449e-09	15.1886	POMP	51371
231705_at	1.7058	4.93568	12.0221	6.13808e-11	4.96449e-09	15.1881	RIDA	10247
208822_s_at	-1.59004	6.25386	-12.0162	6.19381e-11	4.99374e-09	15.1789	DAP3	7818
242649_x_at	-3.09821	6.47415	-12.0062	6.29039e-11	5.04292e-09	15.1633	HMGN2P46	283651
237106_at	1.38923	4.59122	11.9947	6.40368e-11	5.11873e-09	15.1453	SLC11A2	4891
201113_at	-1.9804	6.06958	-11.9901	6.44997e-11	5.14821e-09	15.1381	TUFM	7284
1557192_at	1.89189	4.36547	11.9811	6.54074e-11	5.20546e-09	15.124	COX10-AS1	100874058
204050_s_at	-1.73024	6.26652	-11.9785	6.56708e-11	5.21883e-09	15.1199	CLTA	1211
1560706_at	1.75518	5.95778	11.9705	6.64891e-11	5.26854e-09	15.1074	NEDD9	4739
226217_at	3.20299	6.07261	11.9665	6.69096e-11	5.29419e-09	15.1011	SLC30A7	148867
221599_at	-1.67561	7.07089	-11.9606	6.75211e-11	5.33485e-09	15.0919	AAMDC	28971
201584_s_at	-3.72764	5.6297	-11.9534	6.82852e-11	5.37968e-09	15.0806	DDX39A	10212
240390_at	1.97538	4.22756	11.9485	6.88082e-11	5.4053e-09	15.0729	GALNT5	11227
1570061_at	1.16735	4.59667	11.9461	6.90609e-11	5.41737e-09	15.0692	RAB7A	7879
232180_at	3.13821	7.33787	11.9326	7.05353e-11	5.5251e-09	15.0478	UGP2	7360
225571_at	2.34724	3.52687	11.9282	7.10192e-11	5.55504e-09	15.041	LIFR	3977
220221_at	2.82411	7.31221	11.9123	7.27957e-11	5.67775e-09	15.016	VPS13D	55187
220853_at	1.3583	5.14704	11.9003	7.41808e-11	5.76375e-09	14.997	GTDC1	79712
207021_at	-4.67827	7.78747	-11.9	7.42145e-11	5.76375e-09	14.9966	ZPBP	11055
224940_s_at	4.10315	6.59156	11.8629	7.86349e-11	6.05017e-09	14.9382	PAPPA	5069
228628_at	3.3444	5.91144	11.8581	7.92346e-11	6.08448e-09	14.9305	SRGAP2C	653464
215894_at	2.90873	3.92312	11.8552	7.95926e-11	6.1034e-09	14.926	PTGDR	5729
229368_s_at	1.47454	5.17301	11.8428	8.11565e-11	6.19725e-09	14.9063	ZFAND5	7763
225986_x_at	1.87607	6.86917	11.839	8.16423e-11	6.22565e-09	14.9003	CPSF2	53981
216153_x_at	1.41232	8.07742	11.8353	8.21146e-11	6.25295e-09	14.8945	RECK	8434
232044_at	1.21355	4.72855	11.825	8.34517e-11	6.33711e-09	14.8782	RBBP6	5930
239764_at	1.99023	4.04874	11.8088	8.55932e-11	6.49072e-09	14.8526	ITPR1-DT	100996539
1553706_at	2.75172	5.2913	11.8073	8.57989e-11	6.49731e-09	14.8502	HTRA4	203100
202045_s_at	1.2748	4.82388	11.7758	9.0154e-11	6.78949e-09	14.8002	ARHGAP35	2909
222250_s_at	-2.66472	6.28997	-11.77	9.09852e-11	6.84266e-09	14.791	INTS7	25896
201049_s_at	-3.34455	9.38796	-11.7664	9.14984e-11	6.86238e-09	14.7853	RPS18	6222
217106_x_at	-2.71802	6.95055	-11.7567	9.2905e-11	6.94881e-09	14.7699	DIMT1	27292
1553894_at	1.85904	3.77999	11.7494	9.39768e-11	7.01452e-09	14.7583	CCDC122	160857
235521_at	1.9408	6.51602	11.749	9.40401e-11	7.01452e-09	14.7577	HOXA3	3200
241585_at	3.83058	5.27561	11.7473	9.42979e-11	7.02417e-09	14.7549	LRRC4C	57689
223193_x_at	-2.41208	5.569	-11.7443	9.47397e-11	7.04747e-09	14.7502	FAM162A	26355
1554642_at	1.1566	5.88485	11.7421	9.5068e-11	7.0527e-09	14.7467	RNF32	140545
222380_s_at	3.1749	8.16553	11.7389	9.55522e-11	7.06944e-09	14.7415	PDCD6	10016
223067_at	-2.54605	6.68094	-11.7366	9.59038e-11	7.08298e-09	14.7378	CWC15	51503
201345_s_at	-2.27432	6.96967	-11.736	9.59943e-11	7.08298e-09	14.7369	UBE2D2	7322
226690_at	1.15896	4.889	11.7305	9.68212e-11	7.12476e-09	14.7282	ADCYAP1R1	117
213305_s_at	-3.85672	5.9611	-11.7117	9.97349e-11	7.32931e-09	14.6983	PPP2R5C	5527
242662_at	1.69703	4.44391	11.7061	1.00626e-10	7.38483e-09	14.6893	PCSK6	5046
225413_at	-2.96708	9.57932	-11.6924	1.02837e-10	7.53701e-09	14.6674	ATP5MD	84833
239949_at	0.956388	5.36784	11.6828	1.04397e-10	7.62578e-09	14.6522	THNSL2	55258
207570_at	1.64468	6.41127	11.6824	1.04467e-10	7.62578e-09	14.6515	SHOX	6473
236023_at	1.74346	4.68903	11.671	1.06372e-10	7.73387e-09	14.6333	CDK9	1025
241922_at	1.87329	4.01591	11.6655	1.07306e-10	7.77282e-09	14.6244	LMO4	8543
223060_at	-1.86505	5.80361	-11.6641	1.07544e-10	7.77771e-09	14.6222	C14orf119	55017
237552_at	1.4341	4.30338	11.6624	1.0784e-10	7.78886e-09	14.6194	LINC02582	100505817
213720_s_at	-2.51244	5.67977	-11.6591	1.08394e-10	7.81327e-09	14.6142	SMARCA4	6597
203584_at	-3.72561	6.99589	-11.6587	1.08464e-10	7.81327e-09	14.6136	EMC2	9694
1558903_at	0.871951	3.50774	11.6527	1.09511e-10	7.86794e-09	14.6039	LINC00907	284260
229439_s_at	1.00941	5.57074	11.6445	1.1093e-10	7.9428e-09	14.5909	RBM47	54502
202279_at	-2.86432	6.67166	-11.6442	1.10989e-10	7.9428e-09	14.5904	ATP5MPL	9556
206323_x_at	1.61345	10.3254	11.617	1.15882e-10	8.26055e-09	14.5468	OPHN1	4983
235570_at	1.38352	4.70366	11.6093	1.17318e-10	8.35202e-09	14.5344	RBMS3	27303
215114_at	0.929791	3.94807	11.6045	1.18214e-10	8.40485e-09	14.5267	SENP3	26168
1556629_a_at	1.52705	4.12243	11.6029	1.1852e-10	8.41569e-09	14.5241	SNAP25	6616
211025_x_at	-1.19499	5.47047	-11.6002	1.19017e-10	8.44003e-09	14.5199	COX5B	1329
1569307_s_at	1.50415	3.8332	11.5871	1.21538e-10	8.6076e-09	14.4987	LOC105371622	105371622
202810_at	-3.5261	8.22664	-11.5763	1.23646e-10	8.73427e-09	14.4813	DRG1	4733
200966_x_at	-2.22433	7.27727	-11.5627	1.26357e-10	8.91429e-09	14.4594	ALDOA	226
230742_at	1.38786	4.16189	11.549	1.29142e-10	9.09902e-09	14.4374	RBM5	10181
214328_s_at	-3.40368	10.7609	-11.5414	1.30713e-10	9.19783e-09	14.4252	HSP90AA1	3320
202371_at	-4.05636	6.99867	-11.5402	1.3097e-10	9.2041e-09	14.4232	TCEAL4	79921
207651_at	2.53884	4.98949	11.52	1.3527e-10	9.42842e-09	14.3906	GPR171	29909
229218_at	2.24765	6.39007	11.5179	1.35729e-10	9.44143e-09	14.3872	COL1A2	1278
205127_at	0.891413	5.57393	11.5101	1.3742e-10	9.53481e-09	14.3746	PTGS1	5742
227082_at	2.15396	5.14284	11.4837	1.43365e-10	9.90961e-09	14.3319	ZBTB20	26137
206406_at	-3.5671	10.3391	-11.4826	1.43622e-10	9.91482e-09	14.3301	SMCP	4184
208835_s_at	-2.66915	6.67911	-11.4804	1.44114e-10	9.92243e-09	14.3266	LUC7L3	51747
219862_s_at	-2.97248	7.34035	-11.4679	1.47046e-10	1.00749e-08	14.3063	NARF	26502
1556057_s_at	1.44018	4.8164	11.4654	1.47636e-10	1.01026e-08	14.3022	NEUROD1	4760
243998_at	1.0137	3.28531	11.4526	1.50707e-10	1.02742e-08	14.2814	KRT222	125113
209840_s_at	2.15403	5.02546	11.4487	1.51651e-10	1.03257e-08	14.2751	LRRN3	54674
200673_at	-3.67788	9.47526	-11.4449	1.52563e-10	1.03748e-08	14.269	LAPTM4A	9741
201068_s_at	-3.9171	8.44617	-11.4424	1.53189e-10	1.03891e-08	14.2649	PSMC2	5701
208645_s_at	-2.73751	8.18893	-11.4418	1.53342e-10	1.03891e-08	14.2639	RPS14	6208
218163_at	-2.86734	6.4623	-11.4409	1.53546e-10	1.039e-08	14.2626	MCTS1	28985
207062_at	2.02174	4.37783	11.4332	1.55472e-10	1.04685e-08	14.25	IAPP	3375
200602_at	-4.53921	6.18221	-11.4317	1.55835e-10	1.04801e-08	14.2476	APP	351
212410_at	-3.35714	6.17863	-11.4291	1.56497e-10	1.05116e-08	14.2433	MICU2	221154
1562761_at	1.70417	3.41679	11.4256	1.57387e-10	1.05584e-08	14.2376	NMRK1	54981
233080_s_at	-2.93683	5.60713	-11.4227	1.58112e-10	1.05941e-08	14.2329	PRPF40A	55660
242760_x_at	2.11965	5.43932	11.4178	1.59379e-10	1.0646e-08	14.2249	PIGB	9488
242970_at	1.43729	4.6525	11.4014	1.63641e-10	1.08978e-08	14.1982	DIP2B	57609
238187_at	-2.44112	7.18934	-11.3985	1.64388e-10	1.09342e-08	14.1936	TEX44	165100
223244_s_at	-3.54756	7.4325	-11.3805	1.69253e-10	1.12169e-08	14.1641	NDUFA12	55967
1560257_at	1.94101	4.72916	11.3766	1.70304e-10	1.12592e-08	14.1579	LOC101928988	101928988
1563090_at	1.07331	4.86092	11.3696	1.72256e-10	1.13608e-08	14.1464	CCDC33	80125
47560_at	0.980295	4.9688	11.3639	1.73848e-10	1.14382e-08	14.1371	ADGRL1	22859
200650_s_at	-3.13895	8.4554	-11.358	1.755e-10	1.1533e-08	14.1275	LDHA	3939
201106_at	-3.18172	9.83541	-11.3555	1.76213e-10	1.15659e-08	14.1234	GPX4	2879
206944_at	0.714027	5.4277	11.3471	1.78616e-10	1.16816e-08	14.1097	HTR6	3362
214806_at	3.3669	5.40926	11.3396	1.80805e-10	1.17825e-08	14.0974	BICD1	636
227952_at	4.16085	5.33509	11.3351	1.82121e-10	1.18541e-08	14.0901	ZNF595	152687
216452_at	1.75873	5.53822	11.3332	1.82684e-10	1.18625e-08	14.087	TRPM3	80036
236029_at	4.21568	7.2634	11.3253	1.85028e-10	1.19862e-08	14.0741	FAT3	120114
216086_at	1.62271	4.06125	11.315	1.88135e-10	1.21731e-08	14.0573	SV2C	22987
1554580_a_at	1.03045	5.44912	11.3121	1.89029e-10	1.22165e-08	14.0525	WWP2	11060
226847_at	1.69634	3.70407	11.3098	1.89738e-10	1.22432e-08	14.0487	FST	10468
231016_s_at	1.63789	4.16128	11.3093	1.8989e-10	1.22432e-08	14.0479	ARNT	405
223416_at	-3.37563	5.33629	-11.3065	1.90762e-10	1.22705e-08	14.0432	SF3B6	51639
238129_s_at	1.11554	5.64158	11.3023	1.92063e-10	1.23397e-08	14.0364	FZD2	2535
213677_s_at	-4.43875	9.0516	-11.2942	1.94602e-10	1.24735e-08	14.0231	PMS1	5378
225096_at	-3.18079	8.76861	-11.2795	1.99289e-10	1.27291e-08	13.999	COPRS	55352
1564373_a_at	1.12792	4.90573	11.275	2.00763e-10	1.28083e-08	13.9916	LINC02175	283887
235385_at	1.86131	4.05836	11.2628	2.04769e-10	1.29881e-08	13.9716	2020-03-01	55016
216550_x_at	-2.675	5.98164	-11.2598	2.05769e-10	1.30364e-08	13.9667	ANKRD12	23253
223017_at	-1.95863	7.29931	-11.2512	2.08681e-10	1.32056e-08	13.9525	TXNDC12	51060
1560485_at	1.42746	4.13401	11.2415	2.12017e-10	1.33857e-08	13.9365	HIVEP1	3096
219762_s_at	-2.13234	5.00177	-11.227	2.17058e-10	1.36882e-08	13.9127	RPL36	25873
1555913_at	-1.88948	5.87595	-11.2154	2.212e-10	1.39013e-08	13.8936	GON4L	54856
208200_at	2.45871	5.2052	11.2093	2.23422e-10	1.40248e-08	13.8835	IL1A	3552
236941_at	1.37642	5.53086	11.1953	2.28594e-10	1.43097e-08	13.8604	PRR14L	253143
201160_s_at	-3.76376	7.43682	-11.1952	2.28629e-10	1.43097e-08	13.8602	YBX3	8531
213465_s_at	-3.85437	6.49783	-11.1949	2.28745e-10	1.43097e-08	13.8597	PPP1R7	5510
237281_at	-3.50101	7.01299	-11.1873	2.31589e-10	1.4471e-08	13.8472	AKAP14	158798
1553976_a_at	-3.93701	8.09104	-11.1835	2.33047e-10	1.45289e-08	13.8408	DPCD	25911
240255_at	1.12992	5.78299	11.1763	2.3579e-10	1.46665e-08	13.829	LOC100507395	100507395
1562981_at	0.906565	7.24102	11.1592	2.42492e-10	1.4998e-08	13.8007	HBB	3043
211568_at	2.51116	3.63354	11.1572	2.43283e-10	1.50299e-08	13.7974	ADGRB3	577
227416_s_at	-2.24896	7.57041	-11.1477	2.47091e-10	1.52213e-08	13.7817	ZCRB1	85437
227373_at	-2.82371	6.25886	-11.1474	2.47216e-10	1.52213e-08	13.7812	ATXN1L	342371
1559884_at	1.36861	3.83259	11.1458	2.47864e-10	1.52441e-08	13.7785	CDKN2B-AS1	100048912
215186_at	1.20663	4.66589	11.14	2.50223e-10	1.53662e-08	13.7689	TBC1D30	23329
200734_s_at	-1.96375	6.82465	-11.1395	2.50418e-10	1.53662e-08	13.7682	ARF3	377
210986_s_at	-3.99723	6.27836	-11.1182	2.59336e-10	1.58782e-08	13.7328	TPM1	7168
1570009_at	2.10976	3.62364	11.1168	2.59942e-10	1.58975e-08	13.7304	LOC643711	643711
218881_s_at	0.942795	5.79989	11.1158	2.60373e-10	1.5906e-08	13.7287	FOSL2	2355
224159_x_at	2.21682	9.4154	11.1075	2.63928e-10	1.60693e-08	13.715	TRIM4	89122
212160_at	-2.81316	6.48597	-11.0971	2.68477e-10	1.62738e-08	13.6977	XPOT	11260
1556364_at	1.37464	5.44509	11.0796	2.76328e-10	1.66942e-08	13.6686	ADAMTS9-AS2	100507098
211662_s_at	-3.01632	7.64974	-11.0577	2.86469e-10	1.71956e-08	13.6321	VDAC2	7417
237741_at	1.6907	3.81372	11.0486	2.90774e-10	1.74289e-08	13.617	SLC25A36	55186
217950_at	-3.05335	8.11108	-11.0455	2.92265e-10	1.7445e-08	13.6119	NOSIP	51070
1563906_at	1.12718	4.75166	11.0397	2.95074e-10	1.75934e-08	13.6022	SOBP	55084
214257_s_at	3.34085	7.00463	11.0356	2.97119e-10	1.76961e-08	13.5952	SEC22B	9554
215096_s_at	-2.63845	8.37873	-11.0318	2.98972e-10	1.7787e-08	13.5889	ESD	2098
202076_at	-2.7544	6.35082	-11.0265	3.01569e-10	1.79221e-08	13.5802	BIRC2	329
207092_at	2.77327	5.32979	11.0143	3.07719e-10	1.81898e-08	13.5597	LEP	3952
220526_s_at	-3.33739	6.0958	-11.0143	3.07738e-10	1.81898e-08	13.5597	MRPL20	55052
222544_s_at	-2.04313	7.94845	-11.0123	3.08758e-10	1.82304e-08	13.5563	NSD3	54904
203982_s_at	1.04457	5.1868	11.0074	3.11266e-10	1.83586e-08	13.5481	ABCD4	5826
228863_at	-3.2147	7.462	-11.0064	3.1178e-10	1.83692e-08	13.5465	PCDH17	27253
1562982_at	0.977332	3.94927	11.0019	3.14105e-10	1.84862e-08	13.539	LINC01448	101928795
220232_at	3.06839	7.3596	10.9996	3.15276e-10	1.85352e-08	13.5352	SCD5	79966
229286_at	1.04193	5.89625	10.9983	3.15952e-10	1.8555e-08	13.533	MAGEE1	57692
209033_s_at	-3.30679	6.53259	-10.9972	3.16534e-10	1.85692e-08	13.5312	DYRK1A	1859
217168_s_at	-2.62925	7.80313	-10.9951	3.17674e-10	1.86161e-08	13.5275	HERPUD1	9709
222616_s_at	-1.65645	5.73475	-10.9931	3.18686e-10	1.86554e-08	13.5243	USP16	10600
219833_s_at	-4.19893	7.31011	-10.9904	3.20111e-10	1.87188e-08	13.5198	EFHC1	114327
219802_at	3.04199	7.1371	10.9876	3.21615e-10	1.87679e-08	13.5151	PYROXD1	79912
240807_at	0.944949	4.48841	10.9876	3.21637e-10	1.87679e-08	13.515	LINC01187	100507267
204093_at	-3.74252	7.74903	-10.984	3.23558e-10	1.88598e-08	13.509	CCNH	902
224666_at	-3.58539	7.93368	-10.9817	3.24803e-10	1.89123e-08	13.5051	NSMCE1	197370
214937_x_at	-4.06275	8.26669	-10.9806	3.25368e-10	1.89154e-08	13.5033	PCM1	5108
1556321_a_at	1.67691	4.66296	10.9803	3.25549e-10	1.89154e-08	13.5028	TLNRD1	59274
1552309_a_at	2.52189	5.75149	10.9742	3.28827e-10	1.90654e-08	13.4926	NEXN	91624
209036_s_at	-1.6105	5.83163	-10.9658	3.33449e-10	1.93129e-08	13.4785	MDH2	4191
214857_at	-1.6231	5.20095	-10.9556	3.39121e-10	1.96206e-08	13.4614	RPARP-AS1	100505761
225082_at	-2.91062	6.4504	-10.9441	3.45677e-10	1.99366e-08	13.4421	CPSF3	51692
218254_s_at	-3.86892	6.79539	-10.9432	3.46209e-10	1.99462e-08	13.4405	SAR1B	51128
214747_at	1.2769	4.88219	10.9408	3.47567e-10	1.99823e-08	13.4365	ZBED4	9889
229674_at	1.08985	5.00497	10.9374	3.49547e-10	2.0054e-08	13.4308	SERTAD4	56256
1554401_a_at	-4.12768	6.52055	-10.9297	3.54016e-10	2.02891e-08	13.4179	TCTE3	6991
231747_at	1.73565	4.06744	10.9205	3.59508e-10	2.05608e-08	13.4024	CYSLTR1	10800
213883_s_at	-3.3804	6.70844	-10.9149	3.62839e-10	2.07268e-08	13.393	TM2D1	83941
213754_s_at	-3.16237	5.33191	-10.9032	3.69973e-10	2.10492e-08	13.3733	PAIP1	10605
1554940_a_at	3.53718	8.51496	10.9004	3.717e-10	2.11035e-08	13.3686	FAM230I	388882
1569911_at	1.0943	5.49099	10.8992	3.72453e-10	2.11243e-08	13.3666	LINC00824	101927774
212773_s_at	-3.34615	6.88471	-10.8959	3.74518e-10	2.12187e-08	13.361	TOMM20	9804
242669_at	2.80141	5.39128	10.8952	3.74955e-10	2.12187e-08	13.3598	UFM1	51569
209945_s_at	-2.56264	6.0386	-10.8937	3.759e-10	2.12318e-08	13.3573	GSK3B	2932
208720_s_at	-2.31604	7.29675	-10.8868	3.80199e-10	2.14082e-08	13.3457	RBM39	9584
219370_at	0.753407	3.91359	10.8768	3.86612e-10	2.17469e-08	13.3288	RPRM	56475
209903_s_at	-3.12102	5.31625	-10.8701	3.90949e-10	2.19008e-08	13.3175	ATR	545
243020_at	1.83238	4.88385	10.8646	3.94532e-10	2.20332e-08	13.3083	FAM13A-AS1	285512
226597_at	-3.33662	7.85217	-10.8646	3.94555e-10	2.20332e-08	13.3082	REEP6	92840
215446_s_at	1.67162	3.59742	10.8644	3.94685e-10	2.20332e-08	13.3079	LOX	4015
221394_at	1.08309	6.0766	10.8636	3.95214e-10	2.20332e-08	13.3065	TAAR2	9287
207010_at	3.79649	5.48907	10.8634	3.95329e-10	2.20332e-08	13.3063	GABRB1	2560
235188_at	2.17755	4.28766	10.8565	3.99954e-10	2.22457e-08	13.2945	PCNX4	64430
208813_at	-2.87383	6.29776	-10.8423	4.09497e-10	2.27533e-08	13.2706	GOT1	2805
213392_at	-3.68795	6.36668	-10.8386	4.1203e-10	2.28708e-08	13.2644	IQCK	124152
200047_s_at	-3.30305	5.93231	-10.8369	4.13228e-10	2.2914e-08	13.2614	YY1	7528
203152_at	-1.82768	5.42594	-10.8337	4.15473e-10	2.30152e-08	13.256	MRPL40	64976
200037_s_at	-2.43985	6.81569	-10.8248	4.21704e-10	2.33131e-08	13.2409	CBX3	11335
221933_at	1.745	3.71091	10.8232	4.22812e-10	2.33362e-08	13.2382	NLGN4X	57502
219039_at	0.968629	6.00011	10.823	4.22975e-10	2.33362e-08	13.2378	SEMA4C	54910
238701_x_at	1.65166	9.7539	10.8173	4.27002e-10	2.35109e-08	13.2283	COLCA1	399948
208647_at	-2.59772	7.80742	-10.814	4.29365e-10	2.36172e-08	13.2227	FDFT1	2222
219897_at	0.939491	5.74179	10.8123	4.30592e-10	2.36426e-08	13.2198	RNF122	79845
212386_at	3.68344	7.24453	10.8034	4.37081e-10	2.39453e-08	13.2046	TCF4	6925
236808_at	1.4783	4.12087	10.7976	4.41296e-10	2.41031e-08	13.1949	FGFR1OP2	26127
207506_at	0.750732	4.33791	10.7974	4.41503e-10	2.41031e-08	13.1944	GLRX3	10539
233030_at	1.69197	4.46837	10.7971	4.41725e-10	2.41031e-08	13.1939	PNPLA3	80339
213527_s_at	-1.85733	6.72404	-10.7892	4.47574e-10	2.43979e-08	13.1806	ZNF688	146542
218789_s_at	-1.52675	5.95559	-10.7878	4.48656e-10	2.44325e-08	13.1782	C11orf71	54494
223234_at	-2.1618	5.96521	-10.7851	4.50648e-10	2.44679e-08	13.1737	MAD2L2	10459
208642_s_at	-2.19063	7.14191	-10.7834	4.51983e-10	2.4516e-08	13.1707	XRCC5	7520
212296_at	-2.62004	6.43202	-10.7684	4.63506e-10	2.50665e-08	13.1452	PSMD14	10213
213097_s_at	-3.04706	6.78893	-10.7659	4.65404e-10	2.51442e-08	13.1411	DNAJC2	27000
217494_s_at	1.4147	3.70762	10.7629	4.67784e-10	2.52479e-08	13.1359	PTENP1	11191
208827_at	-1.63152	7.08955	-10.7597	4.70313e-10	2.53593e-08	13.1305	PSMB6	5694
218563_at	-3.53103	7.95334	-10.7578	4.71797e-10	2.54143e-08	13.1273	NDUFA3	4696
209522_s_at	-3.22238	9.83542	-10.753	4.75643e-10	2.55763e-08	13.1191	CRAT	1384
224707_at	-2.12409	7.33573	-10.751	4.77222e-10	2.56308e-08	13.1157	CYSTM1	84418
1562736_at	2.91695	4.29675	10.749	4.78813e-10	2.5691e-08	13.1123	LHX9	56956
226169_at	-2.08832	5.11937	-10.743	4.83711e-10	2.58776e-08	13.102	SBF2	81846
222014_x_at	-2.9992	5.88087	-10.7421	4.84388e-10	2.58885e-08	13.1006	MTO1	25821
200067_x_at	-2.72993	7.87763	-10.7333	4.91614e-10	2.61818e-08	13.0856	SNX3	8724
209037_s_at	-2.65536	7.19844	-10.7324	4.92375e-10	2.61818e-08	13.0841	EHD1	10938
201199_s_at	-1.22656	6.11614	-10.7323	4.92445e-10	2.61818e-08	13.0839	PSMD1	5707
1557644_at	1.80936	3.9016	10.7271	4.96767e-10	2.63185e-08	13.0751	RUNDC3A-AS1	101926996
234103_at	2.93493	5.47463	10.7214	5.01562e-10	2.64981e-08	13.0653	KCNT2	343450
203439_s_at	1.13201	5.9353	10.7185	5.04031e-10	2.65746e-08	13.0604	STC2	8614
1562257_x_at	1.55497	7.00642	10.706	5.14824e-10	2.70654e-08	13.0389	NLRP1	22861
226919_at	1.97158	5.35709	10.7048	5.1585e-10	2.70846e-08	13.0369	LYRM2	57226
1569681_at	0.69967	5.14216	10.7044	5.1618e-10	2.70846e-08	13.0363	LINC01876	101929378
238956_at	1.49622	4.03628	10.7032	5.17181e-10	2.70908e-08	13.0343	EFNA2	1943
202690_s_at	-2.00591	5.15807	-10.7019	5.18331e-10	2.70908e-08	13.032	SNRPD1	6632
205212_s_at	0.873938	5.8136	10.7014	5.18776e-10	2.70908e-08	13.0312	ACAP1	9744
231773_at	1.84598	3.54877	10.7003	5.19762e-10	2.71164e-08	13.0293	ANGPTL1	9068
1565756_a_at	1.03439	4.55972	10.6994	5.20578e-10	2.71331e-08	13.0277	METAP1D	254042
202786_at	-3.40886	7.13271	-10.6931	5.26145e-10	2.73717e-08	13.0169	STK39	27347
213283_s_at	0.936017	5.63895	10.6926	5.26532e-10	2.73717e-08	13.0162	SALL2	6297
217774_s_at	-1.93945	6.59293	-10.6877	5.30902e-10	2.75138e-08	13.0078	TRMT112	51504
1558688_at	1.36414	9.31073	10.684	5.34208e-10	2.76328e-08	13.0015	STX17-AS1	441461
231718_at	-3.02825	7.22034	-10.6814	5.36567e-10	2.77104e-08	12.997	SLU7	10569
202941_at	-1.87936	5.26696	-10.6813	5.36723e-10	2.77104e-08	12.9967	NDUFV2	4729
218809_at	-2.49128	7.35753	-10.6779	5.39769e-10	2.78414e-08	12.991	PANK2	80025
203012_x_at	-2.52184	8.69411	-10.6726	5.44602e-10	2.80378e-08	12.982	RPL23A	6147
209974_s_at	-3.67371	7.62915	-10.6679	5.48968e-10	2.8196e-08	12.9739	BUB3	9184
200820_at	-1.57589	6.17804	-10.6676	5.49223e-10	2.8196e-08	12.9734	PSMD8	5714
223004_s_at	-2.49132	5.92617	-10.6612	5.55211e-10	2.84767e-08	12.9625	TIMMDC1	51300
243835_at	1.30673	3.56889	10.6591	5.57178e-10	2.84974e-08	12.9589	ZDHHC21	340481
228602_at	1.90104	5.35288	10.6572	5.59004e-10	2.85641e-08	12.9556	SGCD	6444
226190_at	-2.28346	8.3206	-10.6462	5.69466e-10	2.90444e-08	12.9368	MAP3K13	9175
1562255_at	1.74661	3.64378	10.6409	5.74646e-10	2.92664e-08	12.9276	SYTL3	94120
242119_at	0.826939	6.677	10.6383	5.77172e-10	2.93553e-08	12.9232	PROX1	5629
233640_x_at	1.61064	5.18009	10.6338	5.81613e-10	2.95536e-08	12.9154	KRTAP9-4	85280
230466_s_at	3.20572	4.91953	10.6315	5.8382e-10	2.96382e-08	12.9116	RASSF3	283349
210908_s_at	-3.11504	7.7521	-10.6157	5.99675e-10	3.03304e-08	12.8844	PFDN5	5204
228116_at	1.16674	6.00216	10.6027	6.13034e-10	3.08918e-08	12.8621	DUXAP10	503639
222605_at	-2.45389	7.45752	-10.6001	6.15785e-10	3.10019e-08	12.8576	RCOR3	55758
214055_x_at	-2.49547	6.31894	-10.5973	6.18718e-10	3.11209e-08	12.8528	PRRC2C	23215
236259_at	1.04235	5.12704	10.592	6.24288e-10	3.13722e-08	12.8437	STK4	6789
206310_at	-3.08794	7.82823	-10.5898	6.26632e-10	3.14611e-08	12.8399	SPINK2	6691
235365_at	-3.77893	7.617	-10.5754	6.42195e-10	3.21539e-08	12.8151	PJVK	494513
203675_at	-3.68822	7.01194	-10.5692	6.48927e-10	3.24315e-08	12.8045	NUCB2	4925
207687_at	1.12373	6.03018	10.548	6.72856e-10	3.35661e-08	12.7678	INHBC	3626
201260_s_at	-2.93441	5.968	-10.5446	6.76754e-10	3.37297e-08	12.762	SYPL1	6856
223705_s_at	-3.60313	6.8288	-10.5396	6.8252e-10	3.39552e-08	12.7534	GPBP1	65056
224495_at	0.912334	3.98838	10.5312	6.92391e-10	3.43837e-08	12.7388	TMEM107	84314
213245_at	1.50313	3.98779	10.5293	6.9466e-10	3.44651e-08	12.7355	ADCY1	107
215310_at	0.977757	4.17301	10.5267	6.97656e-10	3.45824e-08	12.7312	APC	324
200983_x_at	-2.41302	7.5082	-10.5198	7.06008e-10	3.4933e-08	12.7191	CD59	966
224913_s_at	-3.09325	6.85519	-10.5188	7.07189e-10	3.49598e-08	12.7174	TIMM50	92609
239884_at	1.20602	4.52487	10.5178	7.08365e-10	3.49863e-08	12.7157	CADPS	8618
201434_at	-1.64392	6.44263	-10.5171	7.09247e-10	3.49983e-08	12.7145	TTC1	7265
201807_at	-3.92205	7.1637	-10.5146	7.12222e-10	3.50818e-08	12.7102	VPS26A	9559
213939_s_at	-1.91005	7.08861	-10.5132	7.1395e-10	3.51036e-08	12.7078	RUFY3	22902
234526_at	1.2808	4.29239	10.5117	7.15791e-10	3.51407e-08	12.7052	OR51B6	390058
208391_s_at	1.02816	5.08322	10.5101	7.178e-10	3.5198e-08	12.7023	GLP1R	2740
217919_s_at	-2.66367	7.43453	-10.5021	7.27685e-10	3.55869e-08	12.6885	MRPL42	28977
206782_s_at	-2.13841	6.55722	-10.496	7.35282e-10	3.58622e-08	12.678	DNAJC4	3338
209393_s_at	-1.61584	6.16562	-10.4929	7.39167e-10	3.5974e-08	12.6726	EIF4E2	9470
1559500_at	2.13351	4.05646	10.4918	7.40514e-10	3.5974e-08	12.6708	VPS8	23355
218959_at	1.3407	5.49252	10.4916	7.40864e-10	3.5974e-08	12.6703	HOXC10	3226
225209_s_at	-2.26851	6.36224	-10.4908	7.41825e-10	3.59887e-08	12.669	UBE2J2	118424
218288_s_at	-3.73039	6.94213	-10.4746	7.62693e-10	3.69029e-08	12.6409	CCDC90B	60492
241600_at	2.43481	6.69095	10.4732	7.64494e-10	3.69573e-08	12.6385	WIPF3	644150
209659_s_at	-2.4814	6.76326	-10.4672	7.72365e-10	3.7239e-08	12.6281	CDC16	8881
233621_s_at	0.742292	4.03769	10.4657	7.74341e-10	3.73014e-08	12.6255	ARHGEF12	23365
211565_at	1.28351	3.58527	10.4644	7.76155e-10	3.73559e-08	12.6232	SH3GL3	6457
230375_at	1.86938	4.61035	10.457	7.85957e-10	3.77944e-08	12.6104	PNISR	25957
203405_at	-4.21451	7.36669	-10.452	7.9278e-10	3.80555e-08	12.6017	PSMG1	8624
1561061_at	1.17034	5.76821	10.4402	8.09004e-10	3.88002e-08	12.5812	LINC02226	729506
236843_at	0.677729	3.39825	10.436	8.14856e-10	3.90467e-08	12.5739	NOX4	50507
205209_at	1.44605	6.31705	10.4338	8.17964e-10	3.91613e-08	12.57	ACVR1B	91
239464_at	1.37998	6.38948	10.4322	8.20165e-10	3.9198e-08	12.5673	KCNJ15	3772
244508_at	1.71405	4.02053	10.4172	8.41579e-10	4.01513e-08	12.5412	SEPTIN7	989
1559946_s_at	-2.21742	5.49271	-10.4166	8.42484e-10	4.01594e-08	12.5401	RUVBL2	10856
200615_s_at	-3.39272	7.86321	-10.4155	8.43956e-10	4.01945e-08	12.5383	AP2B1	163
1570238_at	1.42764	4.40587	10.411	8.50546e-10	4.04396e-08	12.5304	ZNF527	84503
208948_s_at	-3.35739	6.62048	-10.4103	8.51535e-10	4.04497e-08	12.5293	STAU1	6780
238070_at	1.92423	5.63161	10.4089	8.53677e-10	4.04943e-08	12.5267	CHD1L	9557
231434_at	-4.08652	8.33848	-10.4087	8.53954e-10	4.04943e-08	12.5264	LOC100505841	100505841
231867_at	3.36671	5.73607	10.4059	8.58111e-10	4.06285e-08	12.5215	TENM2	57451
236911_at	1.6007	3.5786	10.4058	8.58271e-10	4.06285e-08	12.5213	RIMKLB	57494
217912_at	-1.50606	6.83198	-10.4045	8.60086e-10	4.06792e-08	12.5191	DUS1L	64118
230900_at	-4.64607	7.573	-10.4012	8.65008e-10	4.08767e-08	12.5133	CCDC110	256309
201923_at	-3.83616	7.3309	-10.3964	8.72196e-10	4.11452e-08	12.505	PRDX4	10549
208612_at	-1.54182	5.7461	-10.3915	8.79608e-10	4.14381e-08	12.4964	PDIA3	2923
213377_x_at	-3.17351	9.97163	-10.3913	8.79921e-10	4.14381e-08	12.496	RPS12	6206
1552836_at	1.21435	5.83683	10.3907	8.80785e-10	4.14428e-08	12.495	ZNF619	285267
214431_at	-2.84432	8.8472	-10.3889	8.83608e-10	4.15045e-08	12.4918	GMPS	8833
1559224_at	1.14166	6.92616	10.3866	8.87008e-10	4.16285e-08	12.4879	LCE1E	353135
1562403_a_at	1.21739	5.30902	10.3845	8.90258e-10	4.17452e-08	12.4842	SLC8A3	6547
240537_s_at	-3.20354	8.14338	-10.376	9.03308e-10	4.22942e-08	12.4695	CDIPTOSP	440356
225154_at	-2.12874	7.50279	-10.3759	9.03514e-10	4.22942e-08	12.4692	SYAP1	94056
234216_at	0.967809	5.91077	10.3713	9.10789e-10	4.25619e-08	12.4611	NSMCE1-DT	400512
216788_at	0.964979	4.32029	10.3642	9.2201e-10	4.30495e-08	12.4487	ZNF443	10224
211746_x_at	-2.53415	6.95698	-10.3636	9.22872e-10	4.30529e-08	12.4477	PSMA1	5682
233093_s_at	-2.28711	6.17768	-10.3522	9.41258e-10	4.38732e-08	12.4278	BIRC6	57448
218847_at	2.51879	7.94732	10.3493	9.4587e-10	4.40131e-08	12.4228	IGF2BP2	10644
239352_at	1.28709	3.62107	10.3462	9.51072e-10	4.41536e-08	12.4172	SLC6A15	55117
231211_s_at	-1.20136	6.37717	-10.3429	9.56418e-10	4.42824e-08	12.4116	YIF1B	90522
209094_at	-2.82621	7.65783	-10.3429	9.56517e-10	4.42824e-08	12.4115	DDAH1	23576
237625_s_at	1.08958	3.34103	10.339	9.62938e-10	4.45043e-08	12.4047	IGKC	3514
1552736_a_at	1.02735	3.65642	10.3347	9.70172e-10	4.46876e-08	12.3971	NETO1	81832
229742_at	-4.05421	7.09826	-10.3311	9.76076e-10	4.48839e-08	12.3909	C15orf61	145853
65635_at	0.936826	6.92133	10.3247	9.86984e-10	4.52713e-08	12.3797	ENGASE	64772
224072_s_at	0.791291	4.18262	10.324	9.88157e-10	4.52871e-08	12.3785	KCNK9	51305
222389_s_at	-2.94154	6.59796	-10.3136	1.00609e-09	4.59933e-08	12.3603	WAC	51322
244700_at	3.67595	5.402	10.3047	1.0218e-09	4.66726e-08	12.3445	SEC61B	10952
1554309_at	-4.32057	8.55059	-10.3039	1.02323e-09	4.66989e-08	12.3431	EIF4G3	8672
204937_s_at	-1.6044	5.94693	-10.3017	1.02701e-09	4.68321e-08	12.3394	ZNF274	10782
228390_at	3.42503	5.02495	10.2992	1.03154e-09	4.69994e-08	12.3349	RAB30	27314
219791_s_at	1.4823	4.0798	10.2964	1.03655e-09	4.71886e-08	12.33	HAND2-AS1	79804
36888_at	1.13934	7.30738	10.2907	1.04678e-09	4.76144e-08	12.3201	HAUS5	23354
1564190_x_at	2.74815	5.00714	10.2809	1.06472e-09	4.83369e-08	12.3028	ZNF519	162655
218061_at	-2.55133	8.78651	-10.2801	1.0662e-09	4.83369e-08	12.3014	MEA1	4201
211936_at	-3.54084	6.07346	-10.2758	1.07419e-09	4.86185e-08	12.2939	HSPA5	3309
205825_at	0.858425	3.78838	10.2692	1.08664e-09	4.91417e-08	12.2822	PCSK1	5122
214192_at	1.52475	6.62188	10.2645	1.09544e-09	4.94973e-08	12.274	NUP88	4927
1557065_at	2.19934	5.8078	10.2612	1.10171e-09	4.96997e-08	12.2682	YLPM1	56252
215652_at	1.37358	3.97279	10.2567	1.11051e-09	4.99728e-08	12.2602	SDHD	6392
229897_at	1.75736	5.74657	10.254	1.1156e-09	5.01607e-08	12.2555	ZNF641	121274
220744_s_at	-2.4638	6.94808	-10.2531	1.11731e-09	5.01962e-08	12.254	IFT122	55764
211428_at	0.635174	3.21482	10.2499	1.12361e-09	5.03965e-08	12.2483	SERPINA1	5265
227523_s_at	-2.27888	6.98015	-10.2492	1.12493e-09	5.04143e-08	12.2471	PHF20L1	51105
225115_at	1.01887	4.69965	10.2438	1.13555e-09	5.08072e-08	12.2376	HIPK2	28996
201092_at	-3.03356	8.68527	-10.2408	1.14154e-09	5.10332e-08	12.2322	RBBP7	5931
213325_at	-3.87169	6.05274	-10.2384	1.14628e-09	5.12033e-08	12.228	NECTIN3	25945
200840_at	-4.00891	9.08844	-10.2324	1.15832e-09	5.16568e-08	12.2175	KARS	3735
226243_at	-1.88078	7.6005	-10.2316	1.15999e-09	5.16892e-08	12.216	PTRHD1	391356
213963_s_at	1.19945	4.58472	10.2253	1.17274e-09	5.20873e-08	12.2049	SAP30	8819
201219_at	2.21955	4.79861	10.2172	1.18932e-09	5.26953e-08	12.1907	CTBP2	1488
239237_at	3.06171	5.22777	10.2133	1.19754e-09	5.30166e-08	12.1837	TRG-AS1	100506776
223962_at	-3.88643	6.52171	-10.2013	1.22276e-09	5.40455e-08	12.1626	TTC29	83894
228151_at	3.49172	6.88678	10.1964	1.23334e-09	5.44264e-08	12.1538	ARL15	54622
224403_at	1.47013	3.63638	10.1964	1.23337e-09	5.44264e-08	12.1538	FCRL4	83417
218357_s_at	-1.51651	6.88386	-10.1934	1.23964e-09	5.4659e-08	12.1487	TIMM8B	26521
235873_at	3.84385	4.65548	10.1826	1.26339e-09	5.56168e-08	12.1294	LOC100506235	100506235
223643_at	1.44448	3.9025	10.1791	1.27096e-09	5.58639e-08	12.1234	CRYGS	1427
236030_at	0.860318	5.93775	10.1791	1.27105e-09	5.58639e-08	12.1233	RCOR2	283248
212870_at	-2.72379	6.02907	-10.1663	1.29971e-09	5.70317e-08	12.1007	SOS2	6655
206982_at	1.19276	3.96927	10.1616	1.31048e-09	5.73663e-08	12.0923	CRYBA1	1411
217622_at	0.643619	5.98871	10.1486	1.34057e-09	5.85429e-08	12.0693	RHBDD3	25807
220051_at	-2.00902	5.94789	-10.1479	1.34235e-09	5.85607e-08	12.068	PRSS21	10942
207053_at	0.478416	3.39592	10.1475	1.34312e-09	5.85607e-08	12.0674	SLC8A1	6546
239486_at	2.50349	4.06614	10.14	1.36098e-09	5.9292e-08	12.054	REL	5966
221705_s_at	1.64444	4.99498	10.1383	1.36508e-09	5.94232e-08	12.051	SIKE1	80143
217854_s_at	-1.43878	5.99979	-10.1283	1.38912e-09	6.04219e-08	12.0333	POLR2E	5434
201845_s_at	-3.05029	5.42566	-10.1242	1.39918e-09	6.08108e-08	12.026	RYBP	23429
1556049_at	3.06869	5.25107	10.1216	1.40561e-09	6.10417e-08	12.0213	RTN4	57142
206835_at	0.968627	3.92758	10.1152	1.42137e-09	6.1621e-08	12.01	STATH	6779
201665_x_at	-3.10583	7.57048	-10.1123	1.42868e-09	6.1847e-08	12.0048	RPS17	6218
220547_s_at	-2.09992	7.5473	-10.1113	1.43101e-09	6.1899e-08	12.0031	SHLD2	54537
211014_s_at	1.07277	5.30434	10.1015	1.45601e-09	6.27325e-08	11.9856	PML	5371
1554154_at	1.27897	4.62188	10.0879	1.49108e-09	6.40416e-08	11.9614	GDAP2	54834
229404_at	0.787743	4.13815	10.0836	1.50248e-09	6.44804e-08	11.9537	TWIST2	117581
202139_at	-1.00998	4.83186	-10.0821	1.50645e-09	6.46003e-08	11.9511	AKR7A2	8574
226004_at	-2.29195	7.25399	-10.0771	1.51958e-09	6.5112e-08	11.9423	CABLES2	81928
200812_at	-2.30565	6.24637	-10.0759	1.52294e-09	6.519e-08	11.94	CCT7	10574
200019_s_at	-2.0793	7.83615	-10.0721	1.5332e-09	6.54905e-08	11.9332	FAU	2197
225112_at	-1.55953	6.23229	-10.0667	1.54782e-09	6.60633e-08	11.9236	ABI2	10152
1556421_at	1.27902	4.07401	10.0639	1.55538e-09	6.63343e-08	11.9186	C8orf34-AS1	286189
224595_at	1.85311	5.35185	10.0626	1.5589e-09	6.64323e-08	11.9164	SLC44A1	23446
222984_at	-3.53122	6.61548	-10.0608	1.56396e-09	6.65961e-08	11.9131	PAIP2	51247
239144_at	1.75904	4.58849	10.0531	1.58507e-09	6.74427e-08	11.8995	B3GAT2	135152
218350_s_at	-3.14794	6.51325	-10.0516	1.58936e-09	6.75723e-08	11.8967	GMNN	51053
1552519_at	1.43598	5.15074	10.0498	1.5945e-09	6.7726e-08	11.8935	ACVR1C	130399
206404_at	3.33472	8.50632	10.0462	1.60468e-09	6.80372e-08	11.887	FGF9	2254
201004_at	-2.79316	6.99399	-10.0368	1.63135e-09	6.90889e-08	11.8703	SSR4	6748
219943_s_at	0.801145	5.06416	10.0324	1.644e-09	6.95172e-08	11.8625	USP46	64854
225720_at	1.24349	4.9366	10.0279	1.65712e-09	6.99942e-08	11.8544	SYNPO2	171024
202776_at	-1.54547	6.41291	-10.0232	1.67101e-09	7.0408e-08	11.8459	DNTTIP2	30836
1553127_a_at	-3.7101	7.45837	-10.0222	1.67385e-09	7.04525e-08	11.8442	RNF168	165918
222742_s_at	-3.23026	7.71007	-10.0166	1.6904e-09	7.10395e-08	11.8342	IFT22	64792
1555057_at	2.5474	5.47044	10.01	1.71026e-09	7.17638e-08	11.8224	NDUFS4	4724
223480_s_at	-3.33188	7.19631	-10.0035	1.73019e-09	7.23984e-08	11.8106	MRPL47	57129
200015_s_at	-3.88879	8.12306	-9.99837	1.74584e-09	7.2921e-08	11.8015	SEPTIN2	4735
204684_at	1.03356	6.10818	9.99736	1.74895e-09	7.29295e-08	11.7997	NPTX1	4884
232523_at	1.06274	3.64257	9.99701	1.75004e-09	7.29295e-08	11.7991	MEGF10	84466
233451_at	0.955333	5.66891	9.9914	1.76747e-09	7.35435e-08	11.789	SLC52A3	113278
209544_at	0.820896	3.30712	9.99087	1.76913e-09	7.3557e-08	11.7881	RIPK2	8767
209577_at	-2.62017	7.6999	-9.98952	1.77334e-09	7.36759e-08	11.7857	PCYT2	5833
229895_s_at	1.34136	5.69873	9.98769	1.77909e-09	7.38551e-08	11.7824	NCK1	4690
213903_s_at	1.2927	4.73512	9.98729	1.78036e-09	7.38551e-08	11.7817	CNOT9	9125
207660_at	0.956993	4.75748	9.98115	1.79978e-09	7.44914e-08	11.7706	DMD	1756
203122_at	-3.06968	6.67408	-9.97959	1.80477e-09	7.46414e-08	11.7678	TRAPPC12	51112
224869_s_at	-2.12427	7.05474	-9.96331	1.85751e-09	7.64561e-08	11.7386	MRPS25	64432
215743_at	0.814643	3.26751	9.96303	1.85844e-09	7.64561e-08	11.7381	NMT2	9397
1559607_s_at	1.03227	3.62266	9.96076	1.86592e-09	7.67063e-08	11.734	GBP6	163351
214773_x_at	1.74596	5.48447	9.95721	1.87768e-09	7.71161e-08	11.7277	TIPRL	261726
207703_at	1.26815	3.78763	9.9569	1.87871e-09	7.71161e-08	11.7271	NLGN4Y	22829
1554059_at	1.20954	5.38653	9.94761	1.90992e-09	7.83383e-08	11.7104	SETMAR	6419
211185_s_at	-3.47233	6.20886	-9.9424	1.92763e-09	7.88872e-08	11.7011	SF3B1	23451
230206_at	2.66229	5.41638	9.94037	1.93458e-09	7.9053e-08	11.6974	DOCK5	80005
1568857_a_at	1.632	5.4971	9.93908	1.93904e-09	7.90805e-08	11.6951	NBR1	4077
208113_x_at	-3.36314	9.4987	-9.93888	1.9397e-09	7.90805e-08	11.6947	PABPC3	5042
235927_at	1.52754	5.15322	9.93874	1.94018e-09	7.90805e-08	11.6945	XPO1	7514
223103_at	-3.40914	5.86407	-9.92991	1.97083e-09	8.01155e-08	11.6786	STARD10	10809
227607_at	-2.95691	6.9338	-9.92703	1.98092e-09	8.04345e-08	11.6734	STAMBPL1	57559
218213_s_at	-2.6798	7.93041	-9.92672	1.982e-09	8.04345e-08	11.6728	TMEM258	746
1561448_at	1.30471	3.52519	9.92641	1.9831e-09	8.04345e-08	11.6723	LOC105375483	105375483
213737_x_at	-4.23539	10.0334	-9.92363	1.99291e-09	8.07728e-08	11.6673	GOLGA8N	643699
237320_at	-2.25304	7.60529	-9.92216	1.99813e-09	8.09244e-08	11.6646	FAM71F2	346653
214058_at	1.14051	5.59859	9.91913	2.00891e-09	8.13005e-08	11.6592	MYCL	4610
221588_x_at	-1.75274	5.86624	-9.9146	2.02513e-09	8.18348e-08	11.651	ALDH6A1	4329
242017_at	0.7335	4.65357	9.90887	2.04585e-09	8.24296e-08	11.6407	ZNF654	55279
239239_at	1.44505	6.09723	9.90608	2.05604e-09	8.27792e-08	11.6356	BANCR	100885775
216837_at	1.49549	4.41869	9.89684	2.09009e-09	8.39027e-08	11.619	EPHA5	2044
219704_at	-2.77513	8.22167	-9.89448	2.09889e-09	8.41942e-08	11.6147	YBX2	51087
227437_at	-1.98938	6.0821	-9.89278	2.10526e-09	8.43879e-08	11.6116	NRAV	100506668
201255_x_at	-1.65109	6.81095	-9.89163	2.10955e-09	8.44978e-08	11.6096	BAG6	7917
230895_at	2.16058	3.72728	9.88591	2.13115e-09	8.5218e-08	11.5992	HAPLN1	1404
212027_at	-2.71433	5.36124	-9.88557	2.13243e-09	8.5218e-08	11.5986	RBM25	58517
241308_at	-2.22992	6.50496	-9.88005	2.1535e-09	8.58807e-08	11.5887	LINC01255	101927433
202066_at	-3.02417	5.63071	-9.87821	2.16058e-09	8.61003e-08	11.5853	PPFIA1	8500
1568612_at	2.02734	3.92405	9.87766	2.16269e-09	8.61216e-08	11.5843	GABRG2	2566
244272_s_at	1.61469	3.66392	9.87489	2.17339e-09	8.63885e-08	11.5793	TC2N	123036
241935_at	0.916563	5.54451	9.8747	2.17413e-09	8.63885e-08	11.579	SHROOM1	134549
239367_at	1.16331	5.04669	9.87023	2.19148e-09	8.69515e-08	11.5709	BDNF	627
202258_s_at	-2.0876	5.44862	-9.8684	2.19865e-09	8.71096e-08	11.5676	N4BP2L2	10443
204053_x_at	-3.37048	7.59697	-9.86125	2.22685e-09	8.80354e-08	11.5547	PTEN	5728
217733_s_at	-2.53173	7.29217	-9.85319	2.2591e-09	8.90047e-08	11.5401	TMSB10	9168
207624_s_at	-3.34561	6.82908	-9.85282	2.26061e-09	8.90047e-08	11.5394	RPGR	6103
201955_at	-2.36147	6.06649	-9.85231	2.26266e-09	8.90047e-08	11.5385	CCNC	892
208792_s_at	-2.40556	7.4052	-9.84056	2.3106e-09	9.06256e-08	11.5172	CLU	1191
1556236_at	1.11534	5.10754	9.83697	2.32545e-09	9.10773e-08	11.5107	ZNF391	346157
217882_at	-2.20572	6.14582	-9.83622	2.32856e-09	9.1134e-08	11.5094	EMC3	55831
234759_at	1.27139	5.04837	9.83479	2.33452e-09	9.13016e-08	11.5068	LOC100287497	100287497
201588_at	-3.43251	8.40148	-9.83154	2.34813e-09	9.17029e-08	11.5009	TXNL1	9352
221104_s_at	1.12863	4.01849	9.82829	2.36179e-09	9.21389e-08	11.495	NIPSNAP3B	55335
1555266_a_at	-1.61778	5.45795	-9.82374	2.38106e-09	9.279e-08	11.4868	ASXL2	55252
229461_x_at	1.09625	2.94207	9.82222	2.38755e-09	9.29769e-08	11.484	NEGR1	257194
210045_at	0.593195	4.68938	9.82152	2.39053e-09	9.30263e-08	11.4827	IDH2	3418
219040_at	0.851897	4.81162	9.81822	2.40468e-09	9.34441e-08	11.4768	CORO7	79585
221923_s_at	-1.28942	7.90877	-9.81699	2.40999e-09	9.35839e-08	11.4745	NPM1	4869
225565_at	0.845152	5.18825	9.8051	2.46181e-09	9.53929e-08	11.4529	CREB1	1385
1564281_at	1.33665	8.04989	9.80413	2.46606e-09	9.54901e-08	11.4512	LINC00491	285708
1560506_at	1.02189	3.65443	9.80251	2.47325e-09	9.57005e-08	11.4482	NCKAP5-AS2	101928161
224851_at	1.44149	4.40037	9.80002	2.4843e-09	9.60601e-08	11.4437	CDK6	1021
209177_at	-2.81303	7.3398	-9.79207	2.51989e-09	9.73223e-08	11.4293	NDUFAF3	25915
214443_at	0.620688	3.88633	9.79194	2.5205e-09	9.73223e-08	11.429	PVR	5817
223334_at	-2.54462	6.50707	-9.78389	2.55709e-09	9.85265e-08	11.4144	TMEM126A	84233
224908_s_at	0.688356	5.12056	9.78318	2.56036e-09	9.85828e-08	11.4131	TTL	150465
224014_at	0.774595	4.93583	9.77977	2.57607e-09	9.89785e-08	11.4069	ZNF160	90338
235368_at	2.14618	6.65755	9.77771	2.58561e-09	9.91559e-08	11.4032	ADAMTS5	11096
230090_at	0.77115	5.26958	9.77387	2.60347e-09	9.96851e-08	11.3962	GDNF	2668
204847_at	-2.21259	7.2864	-9.77385	2.60357e-09	9.96851e-08	11.3961	ZBTB11	27107
230718_at	-3.96648	7.63022	-9.77263	2.60927e-09	9.98333e-08	11.3939	HSF5	124535
220524_at	1.01502	4.5929	9.76652	2.63801e-09	1.00811e-07	11.3828	EPB41L4B	54566
336_at	0.754456	6.21467	9.76642	2.63851e-09	1.00811e-07	11.3826	TBXA2R	6915
227207_x_at	-2.47461	7.98141	-9.76563	2.64221e-09	1.00882e-07	11.3812	ZNF213	7760
226616_s_at	-2.9694	6.90812	-9.75853	2.67611e-09	1.02105e-07	11.3683	NDUFV3	4731
236862_at	2.6978	6.71693	9.75646	2.68607e-09	1.02411e-07	11.3645	GOPC	57120
233814_at	1.55756	4.24714	9.75609	2.68787e-09	1.02411e-07	11.3638	EFNA5	1946
206858_s_at	2.77158	7.31458	9.75529	2.69172e-09	1.02486e-07	11.3624	HOXC6	3223
239082_at	3.17305	7.80757	9.75125	2.71134e-09	1.03127e-07	11.355	FZD3	7976
202154_x_at	-2.4457	7.04172	-9.75105	2.71233e-09	1.03127e-07	11.3546	TUBB3	10381
1553639_a_at	0.831706	3.91302	9.74437	2.74507e-09	1.04227e-07	11.3424	PPARGC1B	133522
239147_at	1.22809	4.25131	9.74265	2.75357e-09	1.04405e-07	11.3393	ARSK	153642
224825_at	-1.57184	6.01681	-9.73944	2.76948e-09	1.04717e-07	11.3335	DNTTIP1	116092
223207_x_at	-2.35281	7.95038	-9.73885	2.77242e-09	1.04756e-07	11.3324	PHPT1	29085
1564383_s_at	-3.36925	6.0521	-9.73803	2.77652e-09	1.04835e-07	11.3309	LINC02076	400579
205406_s_at	-4.53765	8.29807	-9.73468	2.79329e-09	1.05326e-07	11.3248	SPA17	53340
1557502_at	0.814048	3.93551	9.72958	2.81901e-09	1.06004e-07	11.3155	PCCB	5096
205130_at	-2.01132	5.67969	-9.7286	2.82401e-09	1.06119e-07	11.3137	MOK	5891
1553524_at	1.57219	3.76918	9.72713	2.83147e-09	1.06326e-07	11.311	DGKB	1607
202188_at	-1.61739	6.38639	-9.72594	2.83752e-09	1.06465e-07	11.3088	NUP93	9688
226334_s_at	-1.45641	5.69628	-9.72564	2.83907e-09	1.06465e-07	11.3083	AHSA2P	130872
201628_s_at	-2.34357	6.90195	-9.72235	2.85593e-09	1.07024e-07	11.3023	RRAGA	10670
225420_at	1.30167	4.23043	9.72187	2.85838e-09	1.07042e-07	11.3014	GPAM	57678
241998_at	1.0861	3.59099	9.72094	2.86319e-09	1.07149e-07	11.2997	C2orf80	389073
220115_s_at	1.60967	4.5249	9.71595	2.88903e-09	1.07968e-07	11.2906	CDH10	1008
244446_at	-3.36707	6.17297	-9.71519	2.89296e-09	1.08041e-07	11.2892	SMAD1-AS2	101927659
200802_at	-0.922463	6.15438	-9.71155	2.91199e-09	1.08604e-07	11.2826	SARS	6301
231551_at	-3.05323	7.2181	-9.71026	2.91877e-09	1.08782e-07	11.2802	TEX46	729059
222989_s_at	-1.91013	5.98586	-9.70334	2.9554e-09	1.09998e-07	11.2675	UBQLN1	29979
1563497_at	2.6735	9.07297	9.69539	2.99807e-09	1.11303e-07	11.253	USP25	29761
241644_at	0.611262	5.25724	9.69371	3.00715e-09	1.11544e-07	11.2499	BOLA2	552900
223754_at	-3.33685	7.98103	-9.69268	3.0127e-09	1.11674e-07	11.2481	C2orf88	84281
225574_at	3.02115	6.79312	9.69204	3.01622e-09	1.11729e-07	11.2469	RWDD4	201965
223378_at	0.590846	4.79063	9.69035	3.02544e-09	1.11871e-07	11.2438	GLIS2	84662
206547_s_at	-3.06678	6.51301	-9.6819	3.07191e-09	1.13367e-07	11.2283	PPEF1	5475
231529_at	1.1241	4.16274	9.68172	3.0729e-09	1.13367e-07	11.228	MEG3	55384
203024_s_at	-2.64321	6.33234	-9.67797	3.09376e-09	1.13907e-07	11.2211	C5orf15	56951
234003_at	0.826385	5.33808	9.67696	3.09942e-09	1.14038e-07	11.2193	ENOX2	10495
201662_s_at	-2.5274	7.20711	-9.66666	3.15759e-09	1.15944e-07	11.2004	ACSL3	2181
231112_at	0.909817	4.1112	9.66499	3.1671e-09	1.16137e-07	11.1973	SNRPE	6635
204274_at	-2.6924	6.16205	-9.66424	3.17143e-09	1.16213e-07	11.196	EBAG9	9166
31874_at	-2.52644	7.03015	-9.66368	3.17461e-09	1.16213e-07	11.1949	GAS2L1	10634
200040_at	-2.08122	7.35997	-9.66352	3.17553e-09	1.16213e-07	11.1946	KHDRBS1	10657
1559496_at	2.89582	6.37305	9.66244	3.18176e-09	1.16285e-07	11.1927	PPA2	27068
56919_at	-1.3915	7.48322	-9.65644	3.21641e-09	1.17317e-07	11.1817	WDR48	57599
202591_s_at	-3.60494	5.7508	-9.65255	3.23914e-09	1.17988e-07	11.1745	SSBP1	6742
213480_at	-1.6827	6.73497	-9.65087	3.24897e-09	1.18267e-07	11.1714	VAMP4	8674
221737_at	-0.85617	5.69888	-9.64879	3.26122e-09	1.18634e-07	11.1676	GNA12	2768
202244_at	-3.65148	6.85463	-9.64777	3.26725e-09	1.18774e-07	11.1658	PSMB4	5692
1554781_at	0.701797	3.4724	9.64688	3.27254e-09	1.18888e-07	11.1641	MGC32805	153163
218840_s_at	-1.48294	5.45301	-9.64492	3.28412e-09	1.19206e-07	11.1605	NADSYN1	55191
237750_at	1.64234	4.45088	9.63861	3.32185e-09	1.20359e-07	11.1489	XPNPEP3	63929
214023_x_at	2.2777	6.88427	9.6355	3.34058e-09	1.20855e-07	11.1432	TUBB2B	347733
219463_at	0.772241	5.73033	9.63493	3.34406e-09	1.20855e-07	11.1422	LAMP5	24141
217864_s_at	-2.11897	5.77473	-9.63488	3.34436e-09	1.20855e-07	11.1421	PIAS1	8554
220153_at	0.690108	4.42707	9.63408	3.34922e-09	1.2095e-07	11.1406	ENTPD7	57089
218628_at	-3.01182	7.50055	-9.63296	3.35602e-09	1.21116e-07	11.1386	WASHC3	51019
202671_s_at	-3.57431	7.91309	-9.63136	3.36576e-09	1.21387e-07	11.1356	PDXK	8566
200902_at	-3.25688	5.49315	-9.62638	3.39623e-09	1.22325e-07	11.1265	SELENOF	9403
203161_s_at	0.967101	4.63366	9.62393	3.41133e-09	1.22788e-07	11.122	RNF8	9025
208841_s_at	-3.392	6.66579	-9.61857	3.44464e-09	1.23742e-07	11.1121	G3BP2	9908
214356_s_at	-2.32728	7.53708	-9.6161	3.46006e-09	1.24214e-07	11.1076	ECPAS	23392
200710_at	-1.77303	6.33522	-9.61384	3.47425e-09	1.24561e-07	11.1034	ACADVL	37
212477_at	0.698388	3.21	9.61155	3.48874e-09	1.24834e-07	11.0992	ACAP2	23527
200668_s_at	-3.19283	6.89613	-9.60459	3.53306e-09	1.2609e-07	11.0864	UBE2D3	7323
243007_at	1.26349	5.35972	9.58828	3.6392e-09	1.2954e-07	11.0563	TTC5	91875
211971_s_at	-1.21721	4.10269	-9.58329	3.67233e-09	1.30549e-07	11.0471	LRPPRC	10128
1563586_at	0.704574	3.94947	9.58282	3.67544e-09	1.30575e-07	11.0463	LOC401324	401324
200645_at	-2.50553	8.04767	-9.57995	3.69471e-09	1.31174e-07	11.041	GABARAP	11337
240735_at	0.915747	3.35519	9.57477	3.72965e-09	1.32329e-07	11.0314	CDC42BPA	8476
206642_at	2.09249	4.13569	9.57304	3.74134e-09	1.32572e-07	11.0283	DSG1	1828
201227_s_at	-1.85831	7.37945	-9.57071	3.75726e-09	1.3305e-07	11.0239	NDUFB8	4714
230771_at	1.00283	5.19997	9.56938	3.76634e-09	1.33198e-07	11.0215	NKAIN4	128414
222835_at	2.13119	7.14913	9.56686	3.78366e-09	1.33656e-07	11.0168	THSD4	79875
225073_at	-2.49206	7.13526	-9.56678	3.78418e-09	1.33656e-07	11.0167	PPHLN1	51535
215816_at	0.903891	5.99313	9.56273	3.81218e-09	1.34558e-07	11.0092	GUSBP11	91316
239526_x_at	0.606883	5.90784	9.5573	3.85003e-09	1.35632e-07	10.9992	PTPN1	5770
218305_at	-2.18408	6.15813	-9.55448	3.86983e-09	1.36154e-07	10.994	IPO4	79711
220394_at	1.35596	4.06359	9.55303	3.88008e-09	1.36332e-07	10.9913	FGF20	26281
214630_at	0.946193	6.02444	9.55287	3.8812e-09	1.36332e-07	10.991	CYP11B2	1585
232822_x_at	0.842233	4.35494	9.5527	3.88237e-09	1.36332e-07	10.9907	LINC00629	100506757
205690_s_at	-2.02887	5.49826	-9.54766	3.91819e-09	1.37413e-07	10.9814	BUD31	8896
1568699_at	0.615521	4.56655	9.54671	3.92495e-09	1.37474e-07	10.9796	IFT43	112752
215903_s_at	-1.63044	6.29199	-9.5443	3.94223e-09	1.37991e-07	10.9752	MAST2	23139
1555001_at	0.977391	4.19528	9.54376	3.94611e-09	1.38038e-07	10.9742	IQCF1	132141
244804_at	3.74896	6.45974	9.53632	3.99997e-09	1.39654e-07	10.9604	SQSTM1	8878
211587_x_at	0.762519	5.89747	9.53209	4.03093e-09	1.40645e-07	10.9526	CHRNA3	1136
217982_s_at	-3.66187	8.14077	-9.52717	4.06724e-09	1.41731e-07	10.9435	MORF4L1	10933
201166_s_at	-3.06055	8.11486	-9.52265	4.10086e-09	1.4263e-07	10.9351	PUM1	9698
225591_at	-2.95761	8.07989	-9.52111	4.11243e-09	1.4276e-07	10.9323	FBXO25	26260
232107_at	0.777549	3.65467	9.5165	4.14717e-09	1.43783e-07	10.9237	SDHC	6391
218146_at	-2.34935	6.51478	-9.5132	4.17219e-09	1.44468e-07	10.9176	GLT8D1	55830
240191_at	2.05886	3.89635	9.51246	4.1778e-09	1.44479e-07	10.9163	ZNF543	125919
41553_at	0.710228	5.25964	9.507	4.21971e-09	1.45836e-07	10.9061	OSGIN2	734
208003_s_at	1.24512	5.20839	9.49494	4.31363e-09	1.48692e-07	10.8838	NFAT5	10725
224121_x_at	1.07573	6.18598	9.49465	4.31594e-09	1.48692e-07	10.8832	PLEKHB2	55041
201784_s_at	-3.20618	5.8799	-9.49289	4.32988e-09	1.49078e-07	10.88	C11orf58	10944
209091_s_at	-2.91059	6.52223	-9.49132	4.34232e-09	1.49413e-07	10.8771	SH3GLB1	51100
208705_s_at	-3.62894	7.43717	-9.49063	4.34775e-09	1.49505e-07	10.8758	EIF5	1983
219904_at	-1.69745	6.18799	-9.48737	4.37378e-09	1.50306e-07	10.8697	ZSCAN5A	79149
1555758_a_at	-3.34693	7.49773	-9.48127	4.42286e-09	1.51897e-07	10.8584	CDKN3	1033
242916_at	-2.05261	6.5633	-9.47893	4.44178e-09	1.52355e-07	10.8541	CNTRL	11064
223296_at	-2.94326	8.90131	-9.47602	4.46548e-09	1.53043e-07	10.8487	SLC25A33	84275
227913_at	1.09951	5.85786	9.47535	4.47099e-09	1.53069e-07	10.8474	EXOSC3	51010
32502_at	-2.16614	7.35714	-9.47176	4.50045e-09	1.53885e-07	10.8408	GDPD5	81544
229713_at	1.29521	5.38097	9.47096	4.50708e-09	1.54015e-07	10.8393	PIP4K2A	5305
222871_at	0.796245	5.42718	9.46768	4.53415e-09	1.54769e-07	10.8332	KLHDC8A	55220
209799_at	-4.04072	7.24297	-9.46549	4.55237e-09	1.55272e-07	10.8291	PRKAA1	5562
234864_s_at	1.00876	5.23045	9.46365	4.56776e-09	1.557e-07	10.8257	TRPM6	140803
208742_s_at	-2.88383	8.19039	-9.46159	4.58499e-09	1.5619e-07	10.8219	SAP18	10284
201857_at	-2.05509	7.91712	-9.46092	4.59069e-09	1.56286e-07	10.8206	ZFR	51663
226958_s_at	-0.84267	4.87295	-9.45982	4.59989e-09	1.56502e-07	10.8186	MED11	400569
228000_at	-1.53097	7.08067	-9.45663	4.62688e-09	1.57323e-07	10.8126	AZIN2	113451
241733_at	2.09733	4.3114	9.45448	4.64515e-09	1.57846e-07	10.8086	C18orf54	162681
223096_at	-2.8447	6.37914	-9.45352	4.65328e-09	1.57925e-07	10.8069	NOP58	51602
210800_at	1.57638	5.07101	9.45131	4.67224e-09	1.58372e-07	10.8027	TIMM8A	1678
1557146_a_at	1.25214	5.49769	9.45075	4.67697e-09	1.58422e-07	10.8017	SSTR5-AS1	146336
220244_at	0.953767	5.04267	9.44877	4.69404e-09	1.58816e-07	10.798	LINC00312	29931
219980_at	2.09354	4.53436	9.44397	4.73548e-09	1.60094e-07	10.7891	ABHD18	80167
204950_at	0.813591	4.72162	9.44372	4.73768e-09	1.60094e-07	10.7886	CARD8	22900
227255_at	1.14598	4.06915	9.44071	4.76387e-09	1.60681e-07	10.783	PDIK1L	149420
1555958_at	0.996025	4.79939	9.43681	4.79811e-09	1.61736e-07	10.7757	CRTAC1	55118
225852_at	-1.88512	6.47744	-9.4339	4.82375e-09	1.62501e-07	10.7703	ANKRD17	26057
240168_at	3.13862	4.91189	9.43198	4.84081e-09	1.62675e-07	10.7668	XPO7	23039
206747_at	1.05999	6.91618	9.43025	4.85616e-09	1.6309e-07	10.7635	GPRIN2	9721
203006_at	-2.91046	7.61534	-9.42734	4.88224e-09	1.63865e-07	10.7581	INPP5A	3632
200614_at	-2.46561	8.62398	-9.4267	4.88795e-09	1.63956e-07	10.7569	CLTC	1213
233540_s_at	-1.80213	6.56705	-9.42136	4.93605e-09	1.65468e-07	10.747	CDK5RAP2	55755
218859_s_at	-1.9978	8.52833	-9.42012	4.94734e-09	1.65745e-07	10.7447	ESF1	51575
1562619_at	0.971643	5.15964	9.41905	4.95705e-09	1.65968e-07	10.7427	NME9	347736
202021_x_at	-2.71634	7.30639	-9.41332	5.00951e-09	1.67418e-07	10.732	EIF1	10209
1568830_at	0.835397	3.94389	9.41243	5.0177e-09	1.67589e-07	10.7303	IRAK3	11213
201656_at	-2.56158	5.68547	-9.40935	5.04618e-09	1.68437e-07	10.7246	ITGA6	3655
1553438_at	0.970273	6.0562	9.40884	5.05092e-09	1.68492e-07	10.7236	C11orf72	100505621
1563897_at	0.975633	5.06276	9.40702	5.06787e-09	1.68955e-07	10.7202	CRABP1	1381
225948_at	-2.51716	6.51121	-9.40642	5.07345e-09	1.69038e-07	10.7191	COA8	84334
209103_s_at	-1.53654	6.21399	-9.40221	5.1129e-09	1.70248e-07	10.7112	UFD1	7353
228906_at	1.33085	4.52091	9.39965	5.13705e-09	1.70949e-07	10.7065	TET1	80312
202226_s_at	1.4577	5.59985	9.39811	5.15155e-09	1.71245e-07	10.7036	CRK	1398
71933_at	1.25045	7.37591	9.39715	5.16071e-09	1.71423e-07	10.7018	WNT6	7475
201948_at	-2.05583	5.30969	-9.39591	5.1725e-09	1.7171e-07	10.6995	GNL2	29889
207392_x_at	1.87221	6.47151	9.39282	5.20192e-09	1.72477e-07	10.6937	UGT2B15	7366
226153_s_at	2.84106	6.58725	9.39194	5.21037e-09	1.72653e-07	10.6921	CNOT6L	246175
233446_at	1.506	4.42453	9.39152	5.21442e-09	1.72682e-07	10.6913	ONECUT2	9480
238564_at	0.743196	3.95962	9.38928	5.23593e-09	1.73281e-07	10.6871	FAM171B	165215
242230_at	1.47684	5.08222	9.38898	5.23885e-09	1.73281e-07	10.6865	ATXN1	6310
235153_at	2.38146	6.64678	9.38736	5.25444e-09	1.73692e-07	10.6835	RNF183	138065
210014_x_at	-1.58065	6.4049	-9.38521	5.27532e-09	1.74277e-07	10.6795	IDH3B	3420
223211_at	-2.09735	6.04592	-9.37619	5.36368e-09	1.76344e-07	10.6626	HACL1	26061
228111_s_at	-2.11676	5.39978	-9.3703	5.42223e-09	1.78054e-07	10.6516	DNAH1	25981
230273_at	-2.73007	7.04794	-9.36919	5.43325e-09	1.78202e-07	10.6495	CFAP206	154313
222182_s_at	-2.50797	7.22218	-9.36861	5.43911e-09	1.78287e-07	10.6485	CNOT2	4848
232156_at	1.45835	3.41737	9.36476	5.47783e-09	1.79234e-07	10.6413	AP5M1	55745
201022_s_at	-4.03871	7.02265	-9.36414	5.48408e-09	1.79331e-07	10.6401	DSTN	11034
222999_s_at	-1.34222	5.65031	-9.36117	5.51425e-09	1.8021e-07	10.6345	CCNL2	81669
204250_s_at	-1.04686	5.8063	-9.36076	5.5184e-09	1.80238e-07	10.6338	CEP164	22897
221030_s_at	1.02843	4.72712	9.35723	5.55447e-09	1.812e-07	10.6271	ARHGAP24	83478
211954_s_at	-2.27354	5.99507	-9.35008	5.62815e-09	1.83494e-07	10.6138	IPO5	3843
228033_at	1.1219	3.74568	9.34889	5.64059e-09	1.8379e-07	10.6115	E2F7	144455
201994_at	-3.27788	8.45426	-9.3483	5.64672e-09	1.8388e-07	10.6104	MORF4L2	9643
209382_at	-2.43947	6.74276	-9.34058	5.72777e-09	1.86297e-07	10.596	POLR3C	10623
220790_s_at	-2.91149	8.7371	-9.33484	5.78875e-09	1.88057e-07	10.5852	MS4A5	64232
207789_s_at	0.860177	4.97746	9.33211	5.81805e-09	1.88673e-07	10.5801	DPP6	1804
230779_at	2.04703	4.82497	9.33135	5.82616e-09	1.88824e-07	10.5787	TNRC6B	23112
238530_at	3.45987	6.74741	9.3289	5.8526e-09	1.89568e-07	10.5741	NNT	23530
219300_s_at	1.26943	4.80329	9.32715	5.87165e-09	1.90073e-07	10.5708	CNTNAP2	26047
203796_s_at	1.5666	5.46883	9.32413	5.90453e-09	1.90911e-07	10.5651	BCL7A	605
1556917_a_at	-2.43726	6.84766	-9.32007	5.94891e-09	1.92086e-07	10.5575	LOC101928651	101928651
231297_at	-1.62479	6.87416	-9.31443	6.01138e-09	1.93672e-07	10.5469	DOT1L	84444
225317_at	-1.59228	5.74184	-9.31438	6.01193e-09	1.93672e-07	10.5468	ACBD6	84320
244377_at	1.56526	4.70659	9.31412	6.01473e-09	1.93672e-07	10.5463	SLC1A4	6509
228321_s_at	1.72338	3.72913	9.31223	6.03579e-09	1.94122e-07	10.5428	NAA30	122830
219128_at	-2.63188	8.53496	-9.30821	6.0809e-09	1.95343e-07	10.5352	C2orf42	54980
241624_at	1.1341	5.21077	9.3052	6.11488e-09	1.96204e-07	10.5296	LOC389834	389834
218138_at	-2.46596	6.20478	-9.30236	6.14714e-09	1.97008e-07	10.5242	MKKS	8195
240155_x_at	2.53146	6.96655	9.30134	6.15875e-09	1.97264e-07	10.5223	ZNF493	284443
203969_at	1.63304	5.09452	9.29913	6.18396e-09	1.9784e-07	10.5182	PEX3	8504
221173_at	1.17103	5.71106	9.29721	6.20601e-09	1.98429e-07	10.5145	USH1C	10083
232126_at	1.9432	4.42653	9.29686	6.21005e-09	1.98442e-07	10.5139	COQ2	27235
238755_at	1.15968	3.48137	9.29549	6.22578e-09	1.98829e-07	10.5113	RASSF10	644943
210187_at	-2.26942	6.18294	-9.29478	6.23398e-09	1.98962e-07	10.51	FKBP1A	2280
242575_at	1.14675	4.19763	9.2945	6.23725e-09	1.98962e-07	10.5094	SMG7	9887
233949_s_at	-2.02128	6.11867	-9.29303	6.2542e-09	1.99155e-07	10.5067	MYH7B	57644
225300_at	-2.72157	8.01709	-9.28959	6.29417e-09	2.00194e-07	10.5002	KNSTRN	90417
228926_s_at	0.915946	3.94897	9.28893	6.30187e-09	2.00323e-07	10.499	SMARCA2	6595
200048_s_at	-2.85265	6.09026	-9.28656	6.32968e-09	2.0109e-07	10.4945	JTB	10899
208833_s_at	-2.3548	6.90335	-9.28582	6.33838e-09	2.01249e-07	10.4931	ATXN10	25814
1556757_a_at	-3.2436	7.38194	-9.2854	6.34327e-09	2.01287e-07	10.4923	C2CD6	151254
235659_at	0.772749	5.90636	9.28221	6.38085e-09	2.02128e-07	10.4863	TMEM127	55654
244478_at	1.03415	4.72973	9.28182	6.38551e-09	2.02159e-07	10.4856	LRRC37A3	374819
237786_at	0.994261	4.27739	9.27699	6.44294e-09	2.03741e-07	10.4765	MAGI2	9863
1570393_at	0.55298	3.2922	9.27419	6.47644e-09	2.04445e-07	10.4712	EML5	161436
215878_at	1.09756	3.28921	9.26914	6.5374e-09	2.06132e-07	10.4617	ITGB1	3688
206233_at	0.563015	3.2846	9.26866	6.54324e-09	2.06197e-07	10.4608	B4GALT6	9331
1560910_at	0.531195	3.94524	9.26471	6.59134e-09	2.07474e-07	10.4534	PPIL6	285755
1556887_at	0.632119	6.39005	9.26389	6.60137e-09	2.0755e-07	10.4518	NPHP3-AS1	348808
200007_at	-2.5117	8.41305	-9.26171	6.6282e-09	2.08274e-07	10.4477	SRP14	6727
1565716_at	1.14298	4.20087	9.26057	6.64226e-09	2.08596e-07	10.4456	FUS	2521
206149_at	0.857277	5.19608	9.26016	6.64728e-09	2.08634e-07	10.4448	CHP2	63928
225925_s_at	-2.54498	5.52983	-9.25948	6.65566e-09	2.08777e-07	10.4435	USP48	84196
210996_s_at	-2.533	7.08511	-9.25727	6.68304e-09	2.09516e-07	10.4394	YWHAE	7531
1555851_s_at	-1.96103	8.68692	-9.25669	6.69028e-09	2.09622e-07	10.4383	SELENOW	6415
243335_at	1.57533	3.6549	9.25567	6.70295e-09	2.09698e-07	10.4363	P4HA1	5033
200091_s_at	-3.49958	10.2343	-9.25557	6.70421e-09	2.09698e-07	10.4361	RPS25	6230
207746_at	1.96899	4.53921	9.25395	6.72442e-09	2.10145e-07	10.4331	POLQ	10721
203693_s_at	2.26391	6.53134	9.2538	6.72619e-09	2.10145e-07	10.4328	E2F3	1871
219891_at	0.776202	6.4113	9.2482	6.79661e-09	2.12224e-07	10.4222	PGPEP1	54858
238033_at	0.526576	3.67666	9.24698	6.81196e-09	2.12461e-07	10.42	HEXD	284004
203401_at	-4.62695	6.32883	-9.2466	6.81676e-09	2.12489e-07	10.4192	PRPS2	5634
244038_at	1.15536	4.71742	9.24389	6.85119e-09	2.13319e-07	10.4141	WDR89	112840
242129_at	0.675891	3.74857	9.24062	6.89298e-09	2.14498e-07	10.408	SIN3B	23309
203999_at	0.918671	4.54785	9.23939	6.90872e-09	2.14744e-07	10.4056	SYT1	6857
200789_at	-0.833877	5.32528	-9.23852	6.91993e-09	2.1497e-07	10.404	ECH1	1891
221845_s_at	-3.46775	9.9025	-9.23511	6.96395e-09	2.16215e-07	10.3975	CLPB	81570
1564362_x_at	1.12673	8.07847	9.23333	6.98712e-09	2.16756e-07	10.3942	ZNF843	283933
212955_s_at	-2.77427	7.72476	-9.23204	7.00379e-09	2.17082e-07	10.3918	POLR2I	5438
237699_at	-2.60045	6.79524	-9.23047	7.0244e-09	2.17597e-07	10.3888	LINC00427	100507040
210596_at	1.32067	4.42549	9.22891	7.04476e-09	2.18104e-07	10.3858	MAGT1	84061
243520_x_at	-3.8647	6.1342	-9.22499	7.09634e-09	2.19329e-07	10.3784	ADAM30	11085
205624_at	1.12348	4.5172	9.22119	7.14664e-09	2.20509e-07	10.3713	CPA3	1359
202124_s_at	1.27113	4.39899	9.22074	7.15265e-09	2.2057e-07	10.3704	TRAK2	66008
231152_at	1.66218	4.16944	9.21701	7.20249e-09	2.21732e-07	10.3634	INO80D	54891
1568126_at	-2.96069	5.5534	-9.21324	7.25323e-09	2.23043e-07	10.3562	ANXA2	302
1567257_at	1.04682	5.80682	9.21214	7.26812e-09	2.23375e-07	10.3541	OR1J2	26740
208267_at	1.018	5.67627	9.21062	7.28878e-09	2.23884e-07	10.3513	TRPV5	56302
238298_at	1.04488	4.59977	9.20968	7.30156e-09	2.24025e-07	10.3495	LINC00845	100507058
232463_at	1.04096	4.54537	9.20856	7.31672e-09	2.24364e-07	10.3474	LINC00685	283981
215157_x_at	-3.50741	9.65802	-9.20658	7.34384e-09	2.24944e-07	10.3436	PABPC1	26986
232683_s_at	-2.44298	6.8913	-9.20458	7.37117e-09	2.25654e-07	10.3398	PARP6	56965
232080_at	1.16802	3.67458	9.20116	7.41839e-09	2.26719e-07	10.3334	HECW2	57520
223403_s_at	-3.30228	5.81497	-9.19911	7.44672e-09	2.27331e-07	10.3295	POLR1B	84172
216195_at	1.24189	4.49426	9.19874	7.45182e-09	2.27359e-07	10.3288	ANK2	287
227774_s_at	1.18542	3.79355	9.19676	7.47942e-09	2.28052e-07	10.325	IMPAD1	54928
222405_at	-1.40242	6.07088	-9.19347	7.52548e-09	2.29096e-07	10.3188	HACD3	51495
1552976_at	0.876222	4.92001	9.19259	7.53779e-09	2.29313e-07	10.3171	DNAJB13	374407
229684_s_at	0.859141	4.23731	9.19236	7.541e-09	2.29313e-07	10.3167	ZNF644	84146
201980_s_at	-1.50024	5.58743	-9.1877	7.60681e-09	2.31057e-07	10.3079	RSU1	6251
208936_x_at	-2.68057	6.36983	-9.18703	7.61638e-09	2.31219e-07	10.3066	LGALS8	3964
232075_at	-1.76817	7.82988	-9.18623	7.62782e-09	2.31438e-07	10.3051	WDR61	80349
212907_at	-2.50712	6.69403	-9.18505	7.64451e-09	2.31802e-07	10.3029	SLC30A1	7779
244797_at	0.773304	5.04759	9.18479	7.64828e-09	2.31802e-07	10.3024	LINC01159	102682016
206348_s_at	-2.96311	6.02817	-9.18254	7.68049e-09	2.32639e-07	10.2981	PDK3	5165
220574_at	1.28883	4.40365	9.18226	7.68444e-09	2.32639e-07	10.2976	SEMA6D	80031
1565775_at	1.04065	4.48871	9.18111	7.70095e-09	2.3301e-07	10.2954	LOC101927410	101927410
217030_at	0.967274	5.04231	9.17664	7.76551e-09	2.34268e-07	10.2869	LOC101929550	101929550
220223_at	1.29656	3.93722	9.17619	7.77199e-09	2.34268e-07	10.2861	ATAD5	79915
224864_at	-1.56891	6.67393	-9.17555	7.78135e-09	2.34268e-07	10.2849	SRA1	10011
203588_s_at	-2.30145	7.13981	-9.17552	7.78171e-09	2.34268e-07	10.2848	TFDP2	7029
200062_s_at	-3.40729	10.0333	-9.17527	7.78537e-09	2.34268e-07	10.2843	RPL30	6156
227533_at	-1.83161	4.88466	-9.1716	7.839e-09	2.35364e-07	10.2774	RALGPS2	55103
214147_at	-2.3646	7.08371	-9.1686	7.88294e-09	2.36553e-07	10.2717	MROH7	374977
208909_at	-2.8855	7.70896	-9.16762	7.89743e-09	2.36757e-07	10.2698	UQCRFS1	7386
229463_at	1.14255	4.50335	9.16335	7.96066e-09	2.38362e-07	10.2617	NTRK2	4915
38447_at	0.805294	8.18618	9.16028	8.0065e-09	2.39341e-07	10.2559	GRK2	156
235537_at	1.06754	4.93161	9.15927	8.02163e-09	2.39663e-07	10.254	OCIAD1	54940
207783_x_at	-2.41015	10.4042	-9.15792	8.04191e-09	2.40006e-07	10.2514	HUWE1	10075
225824_at	-1.9125	6.73947	-9.15523	8.08246e-09	2.40953e-07	10.2463	CCNK	8812
200090_at	-2.11709	7.08251	-9.1532	8.11322e-09	2.41521e-07	10.2424	FNTA	2339
1553803_at	-1.07475	7.53011	-9.15311	8.11445e-09	2.41521e-07	10.2423	SPATA32	124783
211702_s_at	-1.84746	6.53054	-9.1531	8.11474e-09	2.41521e-07	10.2423	USP32	84669
220940_at	-2.26945	6.68484	-9.15274	8.1202e-09	2.41552e-07	10.2416	ANKRD36B	57730
203275_at	1.50071	3.81495	9.15003	8.16142e-09	2.42514e-07	10.2364	IRF2	3660
47069_at	0.740639	5.15336	9.14559	8.22946e-09	2.43969e-07	10.228	PRR5	55615
213366_x_at	-2.85088	6.03623	-9.14504	8.23794e-09	2.43992e-07	10.227	ATP5F1C	509
32811_at	0.735046	8.018	9.1436	8.26016e-09	2.44518e-07	10.2242	MYO1C	4641
222460_s_at	-1.62914	7.43006	-9.14249	8.2773e-09	2.44893e-07	10.2221	FAM192A	80011
210414_at	1.0654	4.52994	9.13991	8.31743e-09	2.45814e-07	10.2172	FLRT1	23769
223807_at	0.984819	4.6615	9.13719	8.35989e-09	2.46884e-07	10.212	IGSF1	3547
219150_s_at	0.776015	5.35873	9.13701	8.36266e-09	2.46884e-07	10.2117	ADAP1	11033
224186_s_at	-1.66465	5.37433	-9.13519	8.39122e-09	2.47532e-07	10.2082	RNF123	63891
228086_at	1.58937	5.59057	9.1318	8.44457e-09	2.48497e-07	10.2018	STK33	65975
213917_at	0.929346	5.79554	9.12911	8.48723e-09	2.49618e-07	10.1967	PAX8	7849
207014_at	1.14961	3.5206	9.12824	8.50108e-09	2.49778e-07	10.195	GABRA2	2555
222239_s_at	-3.46235	7.06296	-9.12791	8.50639e-09	2.49778e-07	10.1944	INTS6	26512
217031_at	0.912858	4.00333	9.12513	8.55073e-09	2.50945e-07	10.1891	KRT84	3890
223070_at	-2.17536	7.49961	-9.12399	8.56898e-09	2.51346e-07	10.1869	SELENOK	58515
1562226_at	1.04487	3.26899	9.12331	8.57991e-09	2.51532e-07	10.1857	VWDE	221806
214131_at	1.01683	3.9728	9.12169	8.60614e-09	2.52166e-07	10.1826	TXLNGY	246126
222351_at	-3.05651	7.36205	-9.12126	8.61305e-09	2.52233e-07	10.1817	PPP2R1B	5519
202432_at	-2.22751	7.35249	-9.11978	8.63699e-09	2.52798e-07	10.1789	PPP3CB	5532
1555088_x_at	0.999393	7.79265	9.11612	8.69638e-09	2.544e-07	10.172	STAT5B	6777
201569_s_at	-2.30487	5.72961	-9.11492	8.71593e-09	2.54836e-07	10.1697	SAMM50	25813
201879_at	1.2172	5.33158	9.11289	8.74914e-09	2.55534e-07	10.1658	ARIH1	25820
229288_at	0.723229	4.4228	9.11089	8.78213e-09	2.56224e-07	10.162	EPHA7	2045
214184_at	1.0709	4.19631	9.10946	8.8056e-09	2.56771e-07	10.1593	NPFF	8620
201754_at	-3.17468	8.6543	-9.10711	8.84453e-09	2.57769e-07	10.1548	COX6C	1345
220801_s_at	0.747552	5.07937	9.10541	8.87284e-09	2.58406e-07	10.1516	HAO2	51179
208374_s_at	-3.00915	8.12698	-9.10379	8.89979e-09	2.58966e-07	10.1485	CAPZA1	829
213517_at	1.05066	5.45219	9.10168	8.93511e-09	2.59855e-07	10.1445	PCBP2	5094
1553869_at	0.792968	3.67758	9.10101	8.94626e-09	2.60041e-07	10.1432	SESN3	143686
201859_at	-5.1088	7.04245	-9.09718	9.01095e-09	2.61782e-07	10.1359	SRGN	5552
212082_s_at	-3.14409	8.33562	-9.09462	9.05434e-09	2.62719e-07	10.131	MYL6	4637
224444_s_at	-3.85176	10.1845	-9.09219	9.09562e-09	2.63402e-07	10.1264	LINC00467	84791
1563997_at	1.03536	4.92567	9.09048	9.12495e-09	2.64112e-07	10.1231	CEP41	95681
214560_at	0.866017	4.6307	9.08692	9.18615e-09	2.655e-07	10.1163	FPR3	2359
241812_at	2.30487	6.33733	9.08659	9.19188e-09	2.655e-07	10.1157	SPATS2L	26010
201174_s_at	-1.51387	6.64552	-9.08656	9.19236e-09	2.655e-07	10.1156	TERF2IP	54386
1555352_at	1.60166	3.70781	9.08541	9.21225e-09	2.65934e-07	10.1134	FOXP2	93986
219449_s_at	-3.67691	6.98743	-9.08422	9.23283e-09	2.66224e-07	10.1112	TMEM70	54968
1560827_at	0.798949	4.63754	9.08371	9.24175e-09	2.66224e-07	10.1102	LOC101928725	101928725
202824_s_at	-2.68965	8.53966	-9.08284	9.2568e-09	2.66517e-07	10.1085	ELOC	6921
205099_s_at	1.13513	4.95919	9.08137	9.28245e-09	2.66974e-07	10.1057	CCR1	1230
239854_at	-3.51674	7.22316	-9.07937	9.3173e-09	2.67836e-07	10.1019	SYCE3	644186
227465_at	-1.26581	7.94548	-9.07794	9.34238e-09	2.68415e-07	10.0992	MAU2	23383
213449_at	1.0855	5.26127	9.07521	9.39043e-09	2.69371e-07	10.094	POP1	10940
236310_at	0.986064	3.71447	9.07318	9.42632e-09	2.70259e-07	10.0901	ZNF37BP	100129482
222881_at	0.729354	3.59127	9.0722	9.44381e-09	2.70619e-07	10.0882	HPSE	10855
208630_at	-1.09412	6.41902	-9.06924	9.49655e-09	2.71869e-07	10.0826	HADHA	3030
1560416_at	0.570678	3.00438	9.06838	9.51189e-09	2.72141e-07	10.0809	DNAH11	8701
225797_at	-1.17251	4.79395	-9.0658	9.55803e-09	2.73176e-07	10.076	MRPL54	116541
1558452_at	0.664485	3.5812	9.0649	9.57433e-09	2.73499e-07	10.0743	TMEM144	55314
203167_at	-1.98247	6.68828	-9.06444	9.58263e-09	2.73593e-07	10.0734	TIMP2	7077
223661_at	0.883049	3.7597	9.0628	9.61219e-09	2.74128e-07	10.0703	NUCKS1	64710
218556_at	-2.20618	6.51092	-9.06257	9.61643e-09	2.74128e-07	10.0698	ORMDL2	29095
216359_at	2.02916	4.48673	9.06011	9.66102e-09	2.75014e-07	10.0651	MUC7	4589
226752_at	-3.13427	7.1793	-9.06001	9.66283e-09	2.75014e-07	10.0649	FAM174A	345757
1560714_at	1.13355	3.89185	9.05974	9.66763e-09	2.75014e-07	10.0644	EDRF1-DT	399821
219991_at	0.789726	5.6101	9.05881	9.68463e-09	2.75355e-07	10.0627	SLC2A9	56606
202166_s_at	-3.84741	7.21216	-9.0572	9.71399e-09	2.75903e-07	10.0596	PPP1R2	5504
225563_at	-3.57614	7.10558	-9.05564	9.74262e-09	2.76572e-07	10.0566	PAN3	255967
1559640_at	1.91409	4.92065	9.05337	9.78427e-09	2.7761e-07	10.0523	ANKFN1	162282
233008_at	0.848351	5.46698	9.05107	9.82674e-09	2.78526e-07	10.0479	FLJ12825	440101
1553798_a_at	-4.06425	7.87806	-9.05031	9.84074e-09	2.78779e-07	10.0464	FBXL13	222235
217477_at	1.58261	4.45445	9.04114	1.00122e-08	2.83488e-07	10.0289	PIP5K1B	8395
218085_at	-4.56015	7.97902	-9.04069	1.00208e-08	2.83584e-07	10.028	CHMP5	51510
228530_at	2.55058	3.96901	9.03859	1.00606e-08	2.84563e-07	10.024	MZT1	440145
226007_at	-1.57686	6.05619	-9.03724	1.00861e-08	2.85138e-07	10.0214	ISCA2	122961
224903_at	-1.60323	6.12494	-9.0358	1.01136e-08	2.85621e-07	10.0186	UTP4	84916
240521_at	1.07727	4.62777	9.03511	1.01266e-08	2.8584e-07	10.0173	KIZ	55857
1552424_at	-4.56621	6.97422	-9.02907	1.02426e-08	2.88369e-07	10.0058	KLHL10	317719
1554455_at	2.62572	4.79786	9.02784	1.02663e-08	2.88889e-07	10.0034	LINS1	55180
211304_x_at	0.842419	6.37699	9.02627	1.0297e-08	2.89602e-07	10.0004	KCNJ5	3762
208035_at	1.11441	5.02213	9.02335	1.03538e-08	2.90752e-07	9.9948	GRM6	2916
218480_at	-1.69826	6.46916	-9.0224	1.03722e-08	2.9112e-07	9.99299	AGBL5	60509
220298_s_at	-3.81318	8.57743	-9.02183	1.03834e-08	2.91136e-07	9.99189	SPATA6	54558
226414_s_at	-2.95944	7.36061	-9.0194	1.04312e-08	2.92026e-07	9.98723	ANAPC11	51529
222038_s_at	1.25658	3.84423	9.00572	1.0704e-08	2.98593e-07	9.96101	UTP18	51096
200868_s_at	-2.95956	8.33548	-9.00533	1.0712e-08	2.98664e-07	9.96025	RNF114	55905
1555882_at	0.585171	3.29882	9.00412	1.07364e-08	2.9904e-07	9.95794	SPIN3	169981
210868_s_at	0.765679	2.88837	9.00082	1.08037e-08	3.00759e-07	9.9516	ELOVL6	79071
233175_at	0.796414	3.32339	8.99556	1.09116e-08	3.03238e-07	9.94151	ZNF460	10794
214997_at	1.86415	3.82658	8.99539	1.09149e-08	3.03238e-07	9.94119	SCAI	286205
237842_at	0.656451	5.51021	8.98571	1.11166e-08	3.08528e-07	9.9226	MAP7D3	79649
221917_s_at	1.24573	5.50359	8.98197	1.11954e-08	3.10401e-07	9.91542	GRSF1	2926
1556528_at	0.846245	3.12336	8.9786	1.1267e-08	3.1191e-07	9.90895	LINC00692	285326
212689_s_at	-3.43432	8.69898	-8.97801	1.12796e-08	3.12102e-07	9.90781	KDM3A	55818
228332_s_at	-3.57876	6.80135	-8.97754	1.12897e-08	3.12223e-07	9.9069	SELENOH	280636
204237_at	-2.79456	5.70299	-8.9649	1.15631e-08	3.18655e-07	9.8826	GULP1	51454
208336_s_at	-2.50282	6.29619	-8.9642	1.15784e-08	3.18847e-07	9.88126	TECR	9524
1562510_at	0.746728	4.16032	8.96405	1.15817e-08	3.18847e-07	9.88097	LINC01343	339442
1552468_a_at	0.824277	5.28215	8.96348	1.15943e-08	3.19033e-07	9.87987	DSCR10	259234
235339_at	-2.14927	6.37862	-8.95887	1.1696e-08	3.21669e-07	9.871	SETDB2	83852
1557352_at	0.64671	3.58532	8.95603	1.1759e-08	3.23078e-07	9.86553	SQLE	6713
1553555_at	0.88028	6.28439	8.95431	1.17973e-08	3.23805e-07	9.86223	TAS2R38	5726
200826_at	-2.20225	6.23383	-8.95255	1.18367e-08	3.2456e-07	9.85885	SNRPD2	6633
230368_at	0.846247	5.45956	8.95062	1.18802e-08	3.25575e-07	9.85513	ERF	2077
218024_at	-1.8547	6.46532	-8.94066	1.21067e-08	3.30317e-07	9.83594	MPC1	51660
1561651_s_at	0.922259	5.60744	8.94008	1.212e-08	3.30501e-07	9.83482	TAL1	6886
225030_at	-2.11281	5.96671	-8.93776	1.21736e-08	3.31469e-07	9.83035	BOD1	91272
1559403_at	0.815754	4.07124	8.93347	1.22729e-08	3.33509e-07	9.82209	HMGN3-AS1	100288198
211730_s_at	-1.90327	5.95282	-8.93207	1.23056e-08	3.34232e-07	9.81939	POLR2L	5441
239691_at	1.12919	3.55315	8.92921	1.23725e-08	3.35882e-07	9.81388	C12orf77	196415
208270_s_at	-0.811402	5.70747	-8.92389	1.24981e-08	3.39124e-07	9.80362	RNPEP	6051
232572_at	0.854223	4.28704	8.92149	1.25553e-08	3.40281e-07	9.79899	PCA3	50652
218220_at	-2.12526	5.96997	-8.91909	1.26126e-08	3.41215e-07	9.79436	C12orf10	60314
1556123_a_at	-1.30556	4.59618	-8.91749	1.2651e-08	3.41936e-07	9.79127	RAB11B-AS1	100507567
232478_at	2.94598	5.91866	8.91725	1.26567e-08	3.41936e-07	9.79081	MIR181A2HG	100379345
201300_s_at	-2.09826	5.25549	-8.91699	1.26631e-08	3.41936e-07	9.7903	PRNP	5621
1561206_at	0.860429	3.14587	8.91694	1.26643e-08	3.41936e-07	9.79021	KLHL8	57563
200881_s_at	-3.1581	8.23757	-8.91507	1.27093e-08	3.42983e-07	9.7866	DNAJA1	3301
201772_at	-3.00511	7.80623	-8.91329	1.27523e-08	3.43804e-07	9.78317	AZIN1	51582
231793_s_at	1.31083	3.86694	8.90995	1.28336e-08	3.45421e-07	9.77672	CAMK2D	817
1559520_at	1.33226	3.48818	8.90979	1.28376e-08	3.45421e-07	9.7764	GYPA	2993
201997_s_at	-2.51183	7.33295	-8.90819	1.28766e-08	3.46301e-07	9.77332	SPEN	23013
1566190_at	0.84727	3.45659	8.90739	1.28962e-08	3.46317e-07	9.77177	SUZ12	23512
204555_s_at	1.24014	4.1497	8.90351	1.29917e-08	3.48246e-07	9.76428	PPP1R3D	5509
226254_s_at	-2.45494	8.04114	-8.90344	1.29935e-08	3.48246e-07	9.76414	CFAP97	57587
1570423_at	0.892143	3.55541	8.90258	1.30146e-08	3.48632e-07	9.76249	FLG-AS1	339400
1554724_at	0.579797	3.27963	8.90234	1.30207e-08	3.48632e-07	9.76202	SLC6A11	6538
203669_s_at	-1.80276	5.75344	-8.89983	1.30831e-08	3.50091e-07	9.75716	DGAT1	8694
228098_s_at	-2.55289	7.84282	-8.89955	1.309e-08	3.50091e-07	9.75662	MYLIP	29116
239977_at	-2.66502	7.25671	-8.89937	1.30944e-08	3.50091e-07	9.75628	C12orf42	374470
201414_s_at	-1.76229	6.8463	-8.89853	1.31154e-08	3.50482e-07	9.75465	NAP1L4	4676
230060_at	0.79872	3.83701	8.89806	1.3127e-08	3.50589e-07	9.75376	CDCA7	83879
240842_at	-2.75913	6.10373	-8.89785	1.31323e-08	3.50589e-07	9.75335	LOC101927020	101927020
231178_at	-3.16736	8.07643	-8.89383	1.32332e-08	3.53111e-07	9.74557	SPATA4	132851
201239_s_at	-2.27543	6.471	-8.89318	1.32495e-08	3.53301e-07	9.74433	SPCS2	9789
218629_at	0.92394	6.17388	8.89118	1.33001e-08	3.54031e-07	9.74045	SMO	6608
231567_s_at	-2.90502	8.1353	-8.88901	1.3355e-08	3.55148e-07	9.73627	CCDC62	84660
1559023_a_at	1.5153	5.78971	8.88669	1.34142e-08	3.56549e-07	9.73177	EFCAB14	9813
1552689_at	0.841303	5.41499	8.88602	1.34314e-08	3.56834e-07	9.73047	CASKIN1	57524
225951_s_at	-2.74664	6.66561	-8.88558	1.34427e-08	3.56877e-07	9.72962	LINC01578	100507217
214085_x_at	1.9382	5.25787	8.88423	1.34771e-08	3.57525e-07	9.72702	GLIPR1	11010
224968_at	-3.07471	6.40216	-8.88329	1.35013e-08	3.57648e-07	9.7252	CFAP36	112942
244269_at	0.685503	5.32311	8.88282	1.35135e-08	3.57775e-07	9.72428	LINC02218	102723526
1559992_a_at	1.9345	3.67557	8.88259	1.35192e-08	3.57775e-07	9.72385	LINC00645	100505967
221179_at	0.690448	6.08426	8.88179	1.35398e-08	3.57992e-07	9.72231	PRORY	100533178
211512_s_at	0.682354	5.74479	8.87904	1.3611e-08	3.59505e-07	9.71698	OGFR	11054
203336_s_at	-2.03509	5.04353	-8.87879	1.36175e-08	3.59505e-07	9.7165	ITGB1BP1	9270
203449_s_at	1.27137	4.06838	8.87846	1.36261e-08	3.5956e-07	9.71585	TERF1	7013
210219_at	0.720108	3.33139	8.8748	1.37213e-08	3.61723e-07	9.70878	SP100	6672
223603_at	0.748825	4.40967	8.8718	1.38001e-08	3.63448e-07	9.70297	RNF112	7732
217483_at	1.27751	4.68741	8.86732	1.39185e-08	3.66209e-07	9.69429	FOLH1	2346
1559796_at	0.698406	3.88545	8.86693	1.39288e-08	3.66209e-07	9.69354	EBF3	253738
210907_s_at	-2.65056	5.78778	-8.86656	1.39385e-08	3.66213e-07	9.69283	PDCD10	11235
219699_at	0.856756	5.96736	8.86443	1.39954e-08	3.6753e-07	9.68869	LGI2	55203
58696_at	-1.54405	7.20512	-8.85745	1.41829e-08	3.71739e-07	9.67517	EXOSC4	54512
220050_at	-2.62365	6.6958	-8.85691	1.41974e-08	3.71941e-07	9.67414	SPACA9	11092
202184_s_at	-2.30467	6.48043	-8.85515	1.42453e-08	3.72661e-07	9.67071	NUP133	55746
218946_at	-2.64334	5.35865	-8.85467	1.42583e-08	3.72822e-07	9.66979	NFU1	27247
228714_at	0.649194	4.26606	8.85222	1.43251e-08	3.74201e-07	9.66504	PRKRA-AS1	101927027
230068_s_at	0.96842	3.98562	8.85194	1.43328e-08	3.74201e-07	9.66449	PEG3-AS1	100169890
207541_s_at	-1.17406	3.82757	-8.85173	1.43384e-08	3.74201e-07	9.6641	EXOSC10	5394
241432_at	-3.07116	6.46186	-8.84855	1.44257e-08	3.76122e-07	9.65793	SLIT2-IT1	100505893
227406_at	1.51604	5.17308	8.84573	1.45037e-08	3.77793e-07	9.65246	GABPB1-AS1	100129387
214047_s_at	-2.38024	6.27005	-8.84447	1.45386e-08	3.78524e-07	9.65001	MBD4	8930
214137_at	0.978359	5.04947	8.83996	1.46643e-08	3.81614e-07	9.64126	PTPRJ	5795
201193_at	-2.81408	6.71979	-8.83464	1.48141e-08	3.84749e-07	9.63094	IDH1	3417
220072_at	-2.33516	8.07266	-8.83463	1.48144e-08	3.84749e-07	9.63092	CSPP1	79848
201024_x_at	-3.12747	8.12642	-8.83455	1.48167e-08	3.84749e-07	9.63076	EIF5B	9669
231441_at	-2.93111	7.28333	-8.83443	1.48199e-08	3.84749e-07	9.63054	TEX47	219557
1560018_at	0.461907	3.22033	8.83212	1.48854e-08	3.86081e-07	9.62607	ARPP21	10777
201381_x_at	-1.65466	7.44975	-8.82774	1.50107e-08	3.8906e-07	9.61755	CACYBP	27101
235540_at	1.07604	4.00781	8.82753	1.50168e-08	3.8906e-07	9.61714	GNRH1	2796
218447_at	-3.00668	8.52807	-8.8228	1.51529e-08	3.91708e-07	9.60797	CMC2	56942
203511_s_at	-2.27244	7.15765	-8.82278	1.51536e-08	3.91708e-07	9.60793	TRAPPC3	27095
1557617_at	2.40792	4.17756	8.82257	1.51596e-08	3.91708e-07	9.60752	DCTN1-AS1	100189589
210352_at	-3.21891	7.0975	-8.81862	1.52747e-08	3.94494e-07	9.59984	BRD8	10902
202375_at	-3.72593	6.13478	-8.81571	1.53599e-08	3.96319e-07	9.59419	SEC24D	9871
210610_at	0.88021	5.89216	8.81338	1.54286e-08	3.97905e-07	9.58966	CEACAM1	634
225676_s_at	-3.06745	6.03973	-8.81205	1.54679e-08	3.9855e-07	9.58707	DCAF13	25879
1561572_at	1.08637	3.86222	8.8103	1.55197e-08	3.99382e-07	9.58368	LINC02199	101929284
240275_at	-2.7466	7.78887	-8.81021	1.55224e-08	3.99382e-07	9.5835	ARMC3	219681
1562643_at	0.95247	4.94348	8.8053	1.5669e-08	4.02965e-07	9.57395	LOC101929279	101929279
202942_at	-1.29628	6.75429	-8.80484	1.56827e-08	4.03009e-07	9.57307	ETFB	2109
216988_s_at	-2.58921	6.31914	-8.80475	1.56855e-08	4.03009e-07	9.57288	PTP4A2	8073
243243_at	0.838858	4.49905	8.80419	1.57021e-08	4.03248e-07	9.5718	GPC3	2719
1559716_at	0.81396	6.07241	8.80297	1.5739e-08	4.04005e-07	9.56942	INO80C	125476
201196_s_at	-1.90332	7.37277	-8.80193	1.57705e-08	4.04622e-07	9.56739	AMD1	262
239695_at	1.065	3.95619	8.79698	1.59206e-08	4.07942e-07	9.55777	JAK1	3716
238034_at	1.04585	4.75294	8.79597	1.59514e-08	4.08308e-07	9.5558	CANX	821
222895_s_at	2.77492	5.7573	8.79512	1.59773e-08	4.08588e-07	9.55416	BCL11B	64919
203492_x_at	-3.17637	6.89243	-8.79376	1.60189e-08	4.09269e-07	9.55151	CEP57	9702
201597_at	-3.9122	10.1115	-8.79324	1.60351e-08	4.09491e-07	9.55049	COX7A2	1347
224516_s_at	-2.58953	7.47023	-8.79254	1.60566e-08	4.09849e-07	9.54913	CXXC5	51523
207614_s_at	-3.26483	7.37763	-8.79108	1.61016e-08	4.10805e-07	9.54628	CUL1	8454
1556136_at	1.2309	4.46104	8.79059	1.61166e-08	4.10996e-07	9.54534	MYLK4	340156
240709_at	2.45505	4.51914	8.78599	1.62592e-08	4.14439e-07	9.53639	SEZ6L	23544
200682_s_at	-2.15621	6.43005	-8.78535	1.62791e-08	4.14754e-07	9.53515	UBE2L3	7332
244656_at	0.885755	6.51523	8.78243	1.63705e-08	4.16787e-07	9.52946	RASL10B	91608
231179_at	1.09032	5.12577	8.78232	1.63742e-08	4.16787e-07	9.52923	IP6K3	117283
1569871_at	1.25205	7.79729	8.78114	1.64113e-08	4.17538e-07	9.52693	LMF1	64788
210195_s_at	0.672152	4.69696	8.78026	1.64388e-08	4.18042e-07	9.52523	PSG1	5669
205047_s_at	-3.28711	7.2132	-8.77879	1.64852e-08	4.19027e-07	9.52237	ASNS	440
218436_at	-1.10884	6.79284	-8.77817	1.65048e-08	4.19331e-07	9.52116	SIL1	64374
1557770_at	2.28571	4.68761	8.77683	1.65473e-08	4.19942e-07	9.51855	IPO11	51194
207445_s_at	0.923086	4.33058	8.77645	1.65596e-08	4.19942e-07	9.5178	CCR9	10803
200677_at	-2.50094	7.87062	-8.77503	1.66047e-08	4.20801e-07	9.51503	PTTG1IP	754
239384_at	0.632279	3.76373	8.77335	1.66582e-08	4.2166e-07	9.51176	SRSF1	6426
1557003_at	0.921912	5.50648	8.76801	1.68298e-08	4.25611e-07	9.50135	TTC23L	153657
237286_at	1.04495	5.60028	8.7671	1.68592e-08	4.25762e-07	9.49958	INTS9	55756
201786_s_at	-1.75627	7.52722	-8.76328	1.69832e-08	4.283e-07	9.49214	ADAR	103
208857_s_at	-2.94031	6.35659	-8.75653	1.72048e-08	4.32837e-07	9.47897	PCMT1	5110
1568934_at	1.09783	4.67872	8.75635	1.72106e-08	4.32837e-07	9.47863	CX3CR1	1524
1556429_a_at	0.929979	4.09253	8.75598	1.72229e-08	4.32948e-07	9.4779	TBC1D31	93594
214684_at	-1.79482	5.23929	-8.75549	1.72391e-08	4.33157e-07	9.47694	MEF2A	4205
201909_at	-2.84318	6.67117	-8.75459	1.72689e-08	4.33508e-07	9.47519	RPS4Y1	6192
219867_at	0.877408	5.07193	8.75425	1.72802e-08	4.33592e-07	9.47452	CHODL	140578
216180_s_at	0.715003	6.18866	8.74625	1.7548e-08	4.39102e-07	9.4589	SYNJ2	8871
219451_at	2.98266	6.21096	8.74336	1.76456e-08	4.4077e-07	9.45327	MSRB2	22921
1561894_at	0.852143	3.43621	8.74334	1.76464e-08	4.4077e-07	9.45322	CYREN	78996
205335_s_at	-2.81358	6.33486	-8.74332	1.76469e-08	4.4077e-07	9.45319	SRP19	6728
206408_at	2.23323	4.81129	8.74255	1.76731e-08	4.40842e-07	9.45169	LRRTM2	26045
213546_at	-1.23164	5.82151	-8.74253	1.76738e-08	4.40842e-07	9.45165	DKFZP586I1420	222161
1556721_at	0.92871	4.91648	8.74253	1.7674e-08	4.40842e-07	9.45163	C20orf203	284805
242949_x_at	1.50967	5.39553	8.74052	1.77422e-08	4.41938e-07	9.44772	CCDC157	550631
212742_at	-1.52517	5.67111	-8.73941	1.77803e-08	4.42685e-07	9.44554	RNF115	27246
235168_at	2.43813	4.75615	8.73756	1.78436e-08	4.44061e-07	9.44193	PIGM	93183
243534_at	-1.21408	5.75621	-8.73664	1.78751e-08	4.44499e-07	9.44014	CC2D2B	387707
208815_x_at	-2.19483	5.9731	-8.7334	1.79869e-08	4.46812e-07	9.43381	HSPA4	3308
218845_at	-1.78375	6.84304	-8.73267	1.8012e-08	4.47232e-07	9.43239	DUSP22	56940
1559427_at	1.08331	4.22505	8.73041	1.80907e-08	4.48771e-07	9.42796	MCF2L	23263
243116_at	0.806852	5.08109	8.73029	1.80949e-08	4.48771e-07	9.42772	PIP5KL1	138429
205399_at	1.01412	4.88139	8.73018	1.80986e-08	4.48771e-07	9.42752	DCLK1	9201
222691_at	-2.42274	5.81931	-8.72758	1.81895e-08	4.50412e-07	9.42243	SLC35B3	51000
202388_at	-2.56019	6.84742	-8.7254	1.82659e-08	4.521e-07	9.41817	RGS2	5997
200032_s_at	-2.10771	10.9968	-8.72434	1.83032e-08	4.52818e-07	9.4161	RPL9	6133
200039_s_at	-1.55257	6.62257	-8.72239	1.8372e-08	4.54314e-07	9.41229	PSMB2	5690
240317_at	1.48125	3.95869	8.7218	1.83929e-08	4.54589e-07	9.41113	PCDHB4	56131
34858_at	0.620791	6.42685	8.72126	1.84118e-08	4.54682e-07	9.41009	KCTD2	23510
201563_at	-3.05194	8.12459	-8.71867	1.85041e-08	4.56305e-07	9.40501	SORD	6652
1570125_at	1.02819	3.76918	8.71781	1.85347e-08	4.56684e-07	9.40333	GHET1	102723099
1552714_at	0.760552	3.53814	8.71447	1.86542e-08	4.59008e-07	9.3968	CREG2	200407
228892_at	-3.77808	8.86708	-8.71333	1.86953e-08	4.59813e-07	9.39456	SH3RF2	153769
223272_s_at	-1.88166	5.80053	-8.71293	1.87098e-08	4.59963e-07	9.39378	NTPCR	84284
201298_s_at	-1.72863	6.32809	-8.71192	1.8746e-08	4.60646e-07	9.39181	MOB1A	55233
212928_at	1.60642	9.19472	8.7115	1.87614e-08	4.60818e-07	9.39098	TSPYL4	23270
232724_at	0.893663	5.93121	8.71034	1.88032e-08	4.61636e-07	9.38872	MS4A6A	64231
231140_at	-3.61213	9.27554	-8.70838	1.88745e-08	4.62556e-07	9.38487	TPPP2	122664
222289_at	0.693213	4.28265	8.7059	1.89648e-08	4.64163e-07	9.38002	KCNC2	3747
231769_at	-1.68223	4.99029	-8.70484	1.90036e-08	4.64679e-07	9.37795	FBXO6	26270
212075_s_at	-1.60914	6.10748	-8.7042	1.90272e-08	4.65048e-07	9.37669	CSNK2A1	1457
237469_at	1.17649	4.4361	8.70359	1.90494e-08	4.65383e-07	9.3755	TOP2A	7153
217906_at	-3.1518	5.6543	-8.70238	1.90938e-08	4.66052e-07	9.37313	KLHDC2	23588
200001_at	-1.75671	6.25937	-8.70166	1.91205e-08	4.66495e-07	9.37171	CAPNS1	826
225601_at	1.14669	6.45959	8.69927	1.92087e-08	4.68019e-07	9.36704	HMGB3	3149
201301_s_at	-1.66649	6.48035	-8.69806	1.92537e-08	4.68907e-07	9.36466	ANXA4	307
208583_x_at	-1.2142	5.68881	-8.69764	1.92692e-08	4.69076e-07	9.36385	HIST1H2AJ	8331
227550_at	0.750689	4.83485	8.69715	1.92874e-08	4.691e-07	9.36289	GFRA1	2674
1564274_at	0.844646	4.44781	8.69589	1.93344e-08	4.70034e-07	9.36042	C9orf47	286223
244190_at	-3.99032	6.06504	-8.69145	1.95007e-08	4.73619e-07	9.35171	THAP5	168451
235030_at	0.889394	3.19963	8.6908	1.95251e-08	4.73619e-07	9.35044	NXPE3	91775
206559_x_at	-3.29384	11.482	-8.68662	1.9683e-08	4.76601e-07	9.34226	EEF1A1	1915
216304_x_at	-3.58215	6.47212	-8.68443	1.97666e-08	4.78125e-07	9.33796	YME1L1	10730
224307_x_at	0.825424	5.26528	8.68428	1.97721e-08	4.78125e-07	9.33767	MAGI3	260425
224217_s_at	-2.92429	5.93222	-8.67995	1.99383e-08	4.81718e-07	9.32917	FAF1	11124
212149_at	-2.75007	7.42874	-8.67923	1.99657e-08	4.81953e-07	9.32778	EFR3A	23167
1567245_at	0.810664	3.67902	8.67573	2.01011e-08	4.8458e-07	9.32091	OR5J2	282775
1556271_at	1.28896	4.5764	8.67154	2.02645e-08	4.88303e-07	9.31268	LOC101928896	101928896
229693_at	-1.54453	6.70204	-8.66815	2.03976e-08	4.91218e-07	9.30603	TMEM220	388335
223601_at	0.794035	5.76233	8.668	2.04034e-08	4.91218e-07	9.30574	OLFM2	93145
242352_at	-2.42613	6.15023	-8.66752	2.04225e-08	4.9146e-07	9.30479	NIPBL	25836
223924_at	-3.11743	6.03967	-8.66645	2.04646e-08	4.92259e-07	9.3027	TTC25	83538
227566_at	1.12055	4.35113	8.6659	2.04864e-08	4.92565e-07	9.30162	NTM	50863
1553581_s_at	-1.73429	7.26477	-8.66535	2.05084e-08	4.92879e-07	9.30053	SREK1IP1	285672
244396_at	1.50986	3.71563	8.66458	2.0539e-08	4.93179e-07	9.29901	G3BP1	10146
1561232_at	0.704863	4.91694	8.66458	2.0539e-08	4.93179e-07	9.29901	CASC11	100270680
239293_at	1.33002	4.82907	8.66162	2.06567e-08	4.9557e-07	9.29321	NRSN1	140767
1553715_s_at	-1.57456	6.33279	-8.66062	2.06966e-08	4.96309e-07	9.29125	MCRIP2	84331
218333_at	-2.79561	6.88499	-8.65886	2.07674e-08	4.97789e-07	9.28778	DERL2	51009
225392_at	-1.41827	5.19995	-8.65688	2.08469e-08	4.99257e-07	9.2839	GFM2	84340
223731_at	-2.46784	5.91904	-8.65659	2.08583e-08	4.99312e-07	9.28334	MYCBPAP	84073
210302_s_at	0.754824	4.21124	8.65547	2.09036e-08	4.99957e-07	9.28114	MAB21L2	10586
208872_s_at	-1.41919	6.84611	-8.65125	2.10751e-08	5.03524e-07	9.27284	REEP5	7905
230883_at	0.968953	3.55814	8.65089	2.10895e-08	5.03524e-07	9.27214	NXPH2	11249
208970_s_at	-1.82443	6.17172	-8.64984	2.11327e-08	5.04115e-07	9.27006	UROD	7389
218324_s_at	1.07225	4.71187	8.64898	2.11678e-08	5.04562e-07	9.26838	SPATS2	65244
228435_at	1.15772	4.55558	8.64893	2.11699e-08	5.04562e-07	9.26828	FEM1A	55527
202424_at	-1.27124	6.05071	-8.64832	2.11946e-08	5.04931e-07	9.26709	MAP2K2	5605
208002_s_at	-1.59008	6.34294	-8.64661	2.12649e-08	5.05958e-07	9.26373	ACOT7	11332
228422_at	1.04336	6.12986	8.6466	2.12655e-08	5.05958e-07	9.2637	LHFPL4	375323
228785_at	-2.02483	5.30792	-8.64634	2.12763e-08	5.05994e-07	9.26319	ZNF281	23528
214927_at	2.09715	4.75209	8.64597	2.12915e-08	5.06135e-07	9.26246	ITGBL1	9358
1557523_at	0.783504	5.01496	8.64446	2.13537e-08	5.07393e-07	9.2595	ATP6AP1L	92270
229770_at	-2.83793	8.04309	-8.64407	2.13699e-08	5.07557e-07	9.25873	GLT1D1	144423
210735_s_at	0.67232	4.97814	8.64303	2.1413e-08	5.08361e-07	9.25668	CA12	771
223035_s_at	-1.53145	8.08356	-8.64256	2.14325e-08	5.08603e-07	9.25575	FARSB	10056
209131_s_at	-3.06119	5.92634	-8.63909	2.15769e-08	5.11808e-07	9.24893	SNAP23	8773
219326_s_at	0.677667	3.81811	8.63827	2.16111e-08	5.12397e-07	9.24732	B3GNT2	10678
201306_s_at	-1.52447	8.78354	-8.63615	2.16999e-08	5.1428e-07	9.24315	ANP32B	10541
218219_s_at	-2.70728	6.60907	-8.63499	2.17486e-08	5.14987e-07	9.24088	LANCL2	55915
213044_at	-2.79634	7.48807	-8.63466	2.17627e-08	5.15098e-07	9.24022	ROCK1	6093
210853_at	1.73836	5.08427	8.6338	2.17989e-08	5.1522e-07	9.23853	SCN11A	11280
203065_s_at	0.897431	4.60248	8.63364	2.18056e-08	5.1522e-07	9.23822	CAV1	857
238049_at	1.41005	4.20057	8.63277	2.18423e-08	5.15721e-07	9.23651	GRAMD2B	65983
212284_x_at	-3.09149	11.5508	-8.63163	2.18905e-08	5.16557e-07	9.23427	TPT1	7178
237151_s_at	-2.90602	7.77198	-8.63028	2.1948e-08	5.17601e-07	9.23161	CFAP221	200373
217848_s_at	-2.67062	7.34163	-8.62962	2.1976e-08	5.17905e-07	9.23031	PPA1	5464
1554534_at	0.787577	4.62236	8.62572	2.21427e-08	5.21608e-07	9.22263	DPYD	1806
221920_s_at	-1.61576	4.42479	-8.62095	2.23483e-08	5.25772e-07	9.21324	SLC25A37	51312
211982_x_at	-1.50744	6.49588	-8.61981	2.23979e-08	5.26712e-07	9.21099	XPO6	23214
1562103_at	1.05481	7.00801	8.61716	2.25129e-08	5.29188e-07	9.20579	LINC01359	101927084
235344_at	0.604924	3.50055	8.61675	2.2531e-08	5.29386e-07	9.20497	PPM1A	5494
202616_s_at	1.37386	4.62535	8.61624	2.25534e-08	5.29416e-07	9.20396	MECP2	4204
229302_at	0.521817	3.17371	8.61606	2.25613e-08	5.29416e-07	9.20361	TMEM178A	130733
217871_s_at	-2.96027	6.20819	-8.61415	2.26448e-08	5.31147e-07	9.19985	MIF	4282
213593_s_at	2.53677	7.64216	8.61296	2.26971e-08	5.31917e-07	9.19751	TRA2A	29896
202956_at	-2.0601	5.49511	-8.61111	2.27786e-08	5.336e-07	9.19387	ARFGEF1	10565
204528_s_at	-1.97929	6.93268	-8.60931	2.28583e-08	5.35237e-07	9.19032	NAP1L1	4673
1558201_s_at	-1.74949	4.63527	-8.60803	2.29154e-08	5.36051e-07	9.18778	SLC4A1AP	22950
227833_s_at	-2.23345	5.79443	-8.60778	2.29263e-08	5.36051e-07	9.1873	MBD6	114785
224313_at	0.820382	3.64197	8.60763	2.29331e-08	5.36051e-07	9.187	AASDHPPT	60496
218291_at	-0.765495	4.63213	-8.60635	2.29901e-08	5.36256e-07	9.18448	LAMTOR2	28956
1555445_at	0.615779	3.63387	8.60568	2.30198e-08	5.36491e-07	9.18317	CA8	767
237131_at	-1.8601	6.5537	-8.60416	2.30881e-08	5.37625e-07	9.18016	RIIAD1	284485
234367_x_at	0.741092	6.16469	8.60211	2.31801e-08	5.39307e-07	9.17612	TMPRSS6	164656
210293_s_at	-2.88348	7.1418	-8.60118	2.32217e-08	5.40044e-07	9.1743	SEC23B	10483
237253_at	-4.01716	9.17836	-8.59796	2.33673e-08	5.4297e-07	9.16794	IGSF11-AS1	100506765
218998_at	-1.75966	6.56765	-8.59731	2.3397e-08	5.43428e-07	9.16666	ABITRAM	54942
202940_at	0.849422	5.41589	8.59523	2.34915e-08	5.45161e-07	9.16256	WNK1	65125
244654_at	0.76167	5.32239	8.59408	2.3544e-08	5.46147e-07	9.16029	MYO1G	64005
1554001_at	-2.9314	6.20301	-8.59274	2.36052e-08	5.47102e-07	9.15765	TRIM37	4591
243284_at	1.09814	4.34279	8.59036	2.37145e-08	5.49403e-07	9.15296	AAGAB	79719
208736_at	-2.77611	5.18985	-8.58756	2.3844e-08	5.51538e-07	9.14743	ARPC3	10094
203306_s_at	-2.16673	5.78869	-8.5875	2.3847e-08	5.51538e-07	9.1473	SLC35A1	10559
213301_x_at	-3.44096	7.89348	-8.58704	2.3868e-08	5.51558e-07	9.1464	TRIM24	8805
223699_at	1.02444	4.82747	8.58502	2.39619e-08	5.53187e-07	9.14242	CNDP1	84735
244122_at	0.943286	5.53154	8.58487	2.39689e-08	5.53187e-07	9.14212	MGST3	4259
202008_s_at	0.678525	4.27011	8.58408	2.40056e-08	5.53566e-07	9.14057	NID1	4811
224752_at	-2.49698	9.16383	-8.57984	2.42042e-08	5.5788e-07	9.1322	STMP1	647087
212398_at	0.82712	4.4292	8.57614	2.43792e-08	5.61471e-07	9.12488	RDX	5962
1568736_s_at	2.18476	4.66869	8.57421	2.44709e-08	5.63129e-07	9.12106	DLGAP1	9229
1557511_at	-2.93107	7.27953	-8.57332	2.45128e-08	5.63837e-07	9.11932	LINC02189	101928614
1562775_at	1.47612	3.55742	8.56823	2.47571e-08	5.68738e-07	9.10925	NUDT12	83594
214381_at	-3.01583	8.45403	-8.56573	2.48776e-08	5.71026e-07	9.10431	LOC441601	441601
220301_at	1.11896	3.06067	8.56486	2.49196e-08	5.71751e-07	9.1026	CCDC102B	79839
238154_at	-2.43606	6.57726	-8.56186	2.50656e-08	5.74376e-07	9.09667	CEP70	80321
227278_at	-3.38875	5.48062	-8.55906	2.52028e-08	5.77277e-07	9.09112	TAF13	6884
209003_at	1.35585	6.06629	8.55689	2.53091e-08	5.7947e-07	9.08684	SLC25A11	8402
236405_at	0.843976	4.95032	8.55447	2.54285e-08	5.81718e-07	9.08206	FBXO41	150726
213847_at	-2.10103	8.5905	-8.55362	2.54706e-08	5.82437e-07	9.08038	PRPH	5630
201558_at	-3.38363	8.53075	-8.55195	2.5554e-08	5.84099e-07	9.07706	RAE1	8480
217978_s_at	-1.37578	5.47185	-8.55045	2.56285e-08	5.85427e-07	9.0741	UBE2Q1	55585
240145_at	0.982487	4.43661	8.54722	2.57905e-08	5.88106e-07	9.0677	DGKH	160851
1556467_at	1.66182	4.03429	8.54476	2.59141e-08	5.90601e-07	9.06285	ZNF80	7634
231503_at	0.995874	3.62736	8.54441	2.59318e-08	5.90738e-07	9.06215	LOC102546299	102546299
206898_at	2.02979	4.86332	8.54251	2.60279e-08	5.92454e-07	9.05839	CDH19	28513
234683_at	0.704301	5.63561	8.54096	2.61066e-08	5.93999e-07	9.05532	KRTAP4-6	81871
226717_at	-2.46396	8.93515	-8.53962	2.61748e-08	5.95303e-07	9.05267	LRTOMT	220074
1569679_at	1.09121	6.58196	8.5385	2.62322e-08	5.96361e-07	9.05045	CDH22	64405
227466_at	-2.48282	6.92146	-8.53479	2.64227e-08	6.00191e-07	9.0431	FAM200B	285550
228489_at	0.957213	4.85106	8.53119	2.66086e-08	6.04164e-07	9.03597	TM4SF18	116441
231497_at	-2.02069	7.71718	-8.53002	2.66694e-08	6.05061e-07	9.03365	ZBTB20-AS1	100131117
1558571_at	0.612506	3.2715	8.53	2.66703e-08	6.05061e-07	9.03362	LOC101927377	101927377
231345_s_at	0.609986	5.02564	8.52974	2.66837e-08	6.05115e-07	9.03311	DHRS12	79758
212600_s_at	-2.95636	7.50629	-8.52934	2.67049e-08	6.05345e-07	9.0323	UQCRC2	7385
1562681_at	0.699439	4.61278	8.52542	2.69098e-08	6.09483e-07	9.02454	KRTAP5-AS1	338651
200736_s_at	-2.23363	6.69757	-8.5238	2.69949e-08	6.10945e-07	9.02133	GPX1	2876
236981_at	2.63372	4.63585	8.52377	2.69967e-08	6.10945e-07	9.02126	C17orf99	100141515
208652_at	-2.64839	5.03898	-8.52297	2.70384e-08	6.11636e-07	9.01969	PPP2CA	5515
227389_x_at	0.710055	5.72794	8.52017	2.71866e-08	6.14226e-07	9.01414	IRF2BP2	359948
224839_s_at	-1.08355	5.33781	-8.5194	2.72277e-08	6.147e-07	9.0126	GPT2	84706
213220_at	-4.072	7.88219	-8.51682	2.7365e-08	6.17492e-07	9.00749	BBIP1	92482
234941_s_at	0.995366	4.98031	8.51587	2.74155e-08	6.17799e-07	9.00562	GPHN	10243
236312_at	2.01934	3.9244	8.51482	2.74721e-08	6.18376e-07	9.00353	MAD2L1	4085
240982_at	0.72151	4.57308	8.51316	2.7561e-08	6.19868e-07	9.00024	CARS	833
239086_at	1.53184	4.87552	8.50532	2.79864e-08	6.28658e-07	8.98468	IDNK	414328
214831_at	0.81704	4.12301	8.50195	2.81713e-08	6.3205e-07	8.97799	ELK4	2005
58900_at	0.926187	8.59657	8.50193	2.8172e-08	6.3205e-07	8.97796	UBE2D4	51619
238893_at	2.27302	6.72342	8.49971	2.82947e-08	6.34281e-07	8.97355	ATP2B1-AS1	338758
225044_at	-1.94827	6.68687	-8.49771	2.84054e-08	6.36503e-07	8.96958	NT5C3B	115024
216073_at	1.06433	4.25748	8.49721	2.84331e-08	6.36861e-07	8.96859	ANKRD34C	390616
221729_at	1.57483	4.56949	8.49692	2.84494e-08	6.36967e-07	8.96801	COL5A2	1290
212447_at	-2.19796	6.5372	-8.49617	2.84912e-08	6.37498e-07	8.96652	KBTBD2	25948
203371_s_at	-1.71245	7.39327	-8.49607	2.84965e-08	6.37498e-07	8.96633	NDUFB3	4709
204113_at	1.65275	4.49472	8.49355	2.86372e-08	6.40384e-07	8.96133	CELF1	10658
208109_s_at	1.69766	4.65699	8.4916	2.87467e-08	6.42102e-07	8.95745	LINC00597	81698
209816_at	0.706922	4.74657	8.48943	2.88693e-08	6.44256e-07	8.95313	PTCH1	5727
220195_at	0.886961	4.96399	8.48712	2.89999e-08	6.46194e-07	8.94854	MBD5	55777
238813_at	0.685316	4.2008	8.48564	2.90838e-08	6.47721e-07	8.9456	APEX2	27301
221673_s_at	-3.12508	7.43953	-8.48229	2.92749e-08	6.51065e-07	8.93895	CSNK1G1	53944
207009_at	0.985048	5.0316	8.48217	2.92816e-08	6.51065e-07	8.93872	PHOX2B	8929
210171_s_at	-3.34575	5.77854	-8.48039	2.93839e-08	6.53074e-07	8.93517	CREM	1390
1562836_at	1.84793	5.32628	8.47981	2.94174e-08	6.53554e-07	8.93402	DDX6	1656
226524_at	-3.14064	7.04456	-8.4745	2.97243e-08	6.60104e-07	8.92347	C3orf38	285237
1569024_at	0.925318	3.87991	8.47383	2.97634e-08	6.60704e-07	8.92213	FAM13A	10144
1557700_at	0.894926	5.70959	8.47358	2.97781e-08	6.60763e-07	8.92163	POLH	5429
1563039_at	-3.35735	6.54506	-8.47116	2.99195e-08	6.63152e-07	8.91682	LARGE-AS1	100506195
213617_s_at	-2.27549	6.50378	-8.47066	2.99489e-08	6.63206e-07	8.91582	TPGS2	25941
207157_s_at	-1.60868	7.32738	-8.46959	3.00118e-08	6.64331e-07	8.91369	GNG5	2787
231114_at	-4.43385	8.38969	-8.4686	3.00699e-08	6.65348e-07	8.91172	SPATA22	84690
231024_at	2.15297	6.77098	8.46389	3.03487e-08	6.70939e-07	8.90235	PGM5-AS1	572558
231154_x_at	1.4057	5.7101	8.46004	3.0578e-08	6.74405e-07	8.8947	TINAG	27283
225930_at	-2.05006	5.50242	-8.45971	3.0598e-08	6.74575e-07	8.89404	NKIRAS1	28512
231884_at	0.791771	5.63386	8.45927	3.06241e-08	6.74879e-07	8.89317	CNTROB	116840
225866_at	-2.08755	7.74686	-8.45696	3.07632e-08	6.77671e-07	8.88857	RPF2	84154
223287_s_at	-1.53338	6.27012	-8.45596	3.08238e-08	6.78731e-07	8.88657	FOXP1	27086
213770_at	0.56578	6.4232	8.453	3.10028e-08	6.81849e-07	8.88068	KSR1	8844
230108_at	0.690265	5.36533	8.4503	3.11672e-08	6.84639e-07	8.87531	ERCC6	2074
1561476_at	1.00199	3.81506	8.44826	3.12921e-08	6.869e-07	8.87125	CASC6	101929083
236624_at	0.670584	4.77605	8.44817	3.12981e-08	6.869e-07	8.87105	LINC01128	643837
205889_s_at	1.27466	3.28866	8.44801	3.13078e-08	6.869e-07	8.87074	JAKMIP2	9832
215103_at	0.559868	3.35626	8.44701	3.13693e-08	6.87696e-07	8.86874	CYP2C18	1562
239651_at	0.618747	2.93451	8.44587	3.14396e-08	6.88963e-07	8.86647	ANAPC5	51433
232481_s_at	0.875238	4.05636	8.44532	3.14732e-08	6.89422e-07	8.86538	SLITRK6	84189
239397_at	1.1909	4.97027	8.44198	3.16802e-08	6.93122e-07	8.85872	ARHGEF7	8874
229198_at	0.872024	4.83608	8.43956	3.18309e-08	6.96142e-07	8.8539	USP35	57558
235672_at	-2.18585	7.17133	-8.43585	3.20633e-08	7.00385e-07	8.84651	MAP6	4135
202041_s_at	-2.09645	7.54969	-8.43438	3.21559e-08	7.01704e-07	8.84358	FIBP	9158
1559593_a_at	1.35327	6.21375	8.4341	3.21738e-08	7.01704e-07	8.84301	MED26	9441
238642_at	0.808936	5.24367	8.43386	3.21889e-08	7.01704e-07	8.84254	ANKRD13D	338692
225823_at	-3.19086	7.5448	-8.43367	3.22008e-08	7.01704e-07	8.84216	MICOS13	125988
1553750_a_at	-3.38164	7.19296	-8.43106	3.23664e-08	7.04753e-07	8.83695	FAM76B	143684
202678_at	-3.33139	8.46247	-8.42999	3.24346e-08	7.05955e-07	8.83481	GTF2A2	2958
204784_s_at	-3.4141	10.2415	-8.42959	3.24598e-08	7.06223e-07	8.83402	MLF1	4291
223915_at	2.80667	6.33919	8.42928	3.24798e-08	7.06235e-07	8.8334	BCOR	54880
1554903_at	1.02096	7.30409	8.42918	3.24862e-08	7.06235e-07	8.8332	FRMD8	83786
1557570_a_at	2.3295	4.19285	8.42857	3.25252e-08	7.06802e-07	8.83198	LINC01305	285084
231325_at	3.67291	6.26494	8.42728	3.26073e-08	7.08023e-07	8.82942	UNC5D	137970
209194_at	-2.86186	6.86804	-8.42575	3.27053e-08	7.09869e-07	8.82637	CETN2	1069
209662_at	-4.07793	6.40951	-8.42321	3.28687e-08	7.13133e-07	8.8213	CETN3	1070
218428_s_at	-2.03024	5.40458	-8.4226	3.29084e-08	7.13428e-07	8.82008	REV1	51455
1561238_at	0.56761	3.76113	8.41773	3.32249e-08	7.19371e-07	8.81035	PEX2	5828
236274_at	1.38275	7.10148	8.41757	3.32352e-08	7.19371e-07	8.81004	EIF3B	8662
1568191_at	1.09541	6.21841	8.41664	3.32958e-08	7.20399e-07	8.80819	MCAM	4162
218501_at	-1.4597	5.76143	-8.41455	3.34327e-08	7.22906e-07	8.80402	ARHGEF3	50650
237995_at	2.06356	4.34974	8.41447	3.34381e-08	7.22906e-07	8.80385	RIMBP2	23504
200834_s_at	-2.84485	7.47259	-8.41128	3.36482e-08	7.27161e-07	8.79749	RPS21	6227
222512_at	-1.20397	6.30257	-8.40869	3.38203e-08	7.3059e-07	8.79231	NUB1	51667
210386_s_at	-2.22277	8.13986	-8.40662	3.39582e-08	7.3299e-07	8.78817	MTX1	4580
206960_at	1.62169	3.74715	8.40264	3.42248e-08	7.38162e-07	8.78022	LPAR4	2846
223192_at	-1.61922	7.65076	-8.40188	3.42759e-08	7.38681e-07	8.77871	SLC25A28	81894
205562_at	-1.22471	6.03012	-8.39958	3.44318e-08	7.41457e-07	8.7741	RPP38	10557
201903_at	-1.65196	7.17848	-8.39786	3.45479e-08	7.43079e-07	8.77068	UQCRC1	7384
226283_at	-2.27034	7.83719	-8.39675	3.46235e-08	7.44413e-07	8.76846	POC1B	282809
1562785_at	0.935182	5.18887	8.3933	3.48595e-08	7.48603e-07	8.76155	HERC6	55008
217772_s_at	-2.55389	7.68228	-8.39199	3.49497e-08	7.49951e-07	8.75893	MTCH2	23788
238777_x_at	-3.7948	9.2296	-8.38827	3.52065e-08	7.55164e-07	8.75149	ATMIN	23300
227775_at	-2.37892	6.34098	-8.38712	3.52861e-08	7.56575e-07	8.7492	CELF6	60677
33767_at	-4.64882	8.75528	-8.38479	3.54482e-08	7.59754e-07	8.74454	NEFH	4744
229289_at	-2.38647	6.93672	-8.38455	3.54655e-08	7.59826e-07	8.74404	FAM71E1	112703
212350_at	-2.2431	6.83393	-8.38407	3.54985e-08	7.60234e-07	8.7431	TBC1D1	23216
1567878_at	0.4701	2.91974	8.38195	3.56475e-08	7.62978e-07	8.73884	DEFB114	245928
204155_s_at	0.545087	5.7827	8.38185	3.56545e-08	7.62978e-07	8.73865	SIK3	23387
226155_at	-2.30815	7.44922	-8.37978	3.57999e-08	7.65269e-07	8.73451	FAM160B1	57700
228130_at	0.936603	6.4578	8.37932	3.58325e-08	7.65589e-07	8.73358	ZSCAN30	100101467
242780_at	0.988011	4.84192	8.37591	3.60736e-08	7.69837e-07	8.72677	VAPA	9218
224772_at	1.59567	6.69154	8.37518	3.61258e-08	7.7065e-07	8.7253	NAV1	89796
224302_s_at	-1.85728	4.78215	-8.37201	3.63519e-08	7.74869e-07	8.71896	MRPS36	92259
218214_at	-1.21805	6.35815	-8.3696	3.6525e-08	7.77953e-07	8.71414	ATG101	60673
224332_s_at	-2.25834	6.58781	-8.36921	3.65534e-08	7.78254e-07	8.71335	MRPL43	84545
200006_at	-3.44604	9.37101	-8.36885	3.65789e-08	7.78495e-07	8.71264	PARK7	11315
206608_s_at	-2.73161	6.61666	-8.36645	3.67524e-08	7.81578e-07	8.70783	RPGRIP1	57096
211717_at	0.758303	4.05526	8.36572	3.6806e-08	7.82349e-07	8.70635	ANKRD40	91369
230844_at	-3.11079	6.64777	-8.36556	3.68173e-08	7.82349e-07	8.70604	CT75	440934
224736_at	-3.067	8.19834	-8.36476	3.68752e-08	7.83276e-07	8.70444	CCAR1	55749
212685_s_at	-2.44351	8.96386	-8.36246	3.70427e-08	7.85917e-07	8.69984	TBL2	26608
230430_at	0.680913	4.48601	8.36187	3.70863e-08	7.86233e-07	8.69864	ENTPD2	954
212077_at	-3.02144	6.1	-8.36073	3.71696e-08	7.87693e-07	8.69636	CALD1	800
206364_at	1.30072	5.13557	8.35615	3.75069e-08	7.93919e-07	8.68718	KIF14	9928
244521_at	1.06823	3.90578	8.35427	3.7646e-08	7.96134e-07	8.68342	TSHZ2	128553
210183_x_at	-1.27611	6.36555	-8.35415	3.76553e-08	7.96134e-07	8.68317	PNN	5411
1560105_at	1.0076	3.94824	8.35111	3.78817e-08	8.00612e-07	8.67708	PTPRB	5787
217559_at	-3.32124	7.39779	-8.34959	3.79954e-08	8.01306e-07	8.67403	RPL10L	140801
242685_at	1.84651	3.98716	8.34958	3.79962e-08	8.01306e-07	8.67401	GTPBP8	29083
214247_s_at	-2.12106	6.21399	-8.3495	3.80025e-08	8.01306e-07	8.67384	DKK3	27122
204195_s_at	-1.34189	5.10622	-8.34697	3.81928e-08	8.04698e-07	8.66877	PKNOX1	5316
1557215_at	0.825243	3.50588	8.34584	3.8278e-08	8.05873e-07	8.6665	LINC00648	100506433
232975_at	1.13522	5.86493	8.34415	3.84059e-08	8.07942e-07	8.66312	HCG18	414777
201833_at	-3.05584	6.65434	-8.34181	3.8584e-08	8.10441e-07	8.65841	HDAC2	3066
220694_at	1.16241	4.92641	8.34158	3.86011e-08	8.1049e-07	8.65796	ASAP1-IT1	29065
203534_at	-1.54324	6.38221	-8.34048	3.86851e-08	8.11225e-07	8.65576	LSM1	27257
224269_at	0.934857	4.2606	8.33774	3.88953e-08	8.14165e-07	8.65025	KRTAP4-12	83755
217878_s_at	-1.04187	5.69633	-8.33696	3.89548e-08	8.14929e-07	8.6487	CDC27	996
1554787_at	0.922713	4.56692	8.33651	3.89897e-08	8.14929e-07	8.64779	STKLD1	169436
210250_x_at	-1.24098	4.5988	-8.33635	3.90022e-08	8.14929e-07	8.64746	ADSL	158
228610_at	1.19605	4.18294	8.33629	3.90063e-08	8.14929e-07	8.64735	TM9SF3	56889
201823_s_at	-3.0071	6.46258	-8.33464	3.91338e-08	8.17281e-07	8.64404	RNF14	9604
221996_s_at	0.591671	3.29814	8.33411	3.91749e-08	8.17513e-07	8.64297	CLTB	1212
223488_s_at	0.843126	6.41232	8.33369	3.9207e-08	8.17873e-07	8.64214	GNB4	59345
205851_at	0.852458	4.03385	8.33343	3.92278e-08	8.17994e-07	8.6416	NME6	10201
203484_at	-3.30032	7.10206	-8.33225	3.93188e-08	8.19579e-07	8.63925	SEC61G	23480
216016_at	1.83501	4.13413	8.33104	3.9413e-08	8.2123e-07	8.63681	NLRP3	114548
226935_s_at	-0.85301	6.84334	-8.33043	3.94609e-08	8.21913e-07	8.63558	CLPTM1L	81037
1561370_at	0.642433	3.91873	8.3294	3.95413e-08	8.23275e-07	8.63351	LOC100505716	100505716
243610_at	-3.64804	6.6096	-8.32613	3.97978e-08	8.28301e-07	8.62694	C9orf135	138255
1567856_x_at	0.542924	3.46798	8.32478	3.99038e-08	8.30191e-07	8.62424	ZNF29P	7577
1559128_at	1.27993	3.71113	8.3214	4.01714e-08	8.35123e-07	8.61745	HSDL2	84263
221549_at	0.723694	6.30519	8.31795	4.04465e-08	8.40201e-07	8.61052	GRWD1	83743
219308_s_at	1.15796	4.546	8.31635	4.05746e-08	8.42544e-07	8.6073	AK5	26289
208107_s_at	-3.12496	7.28169	-8.31495	4.06871e-08	8.44558e-07	8.60449	REXO5	81691
228219_s_at	1.08271	6.42285	8.31324	4.08249e-08	8.46912e-07	8.60105	UPB1	51733
206509_at	-4.81703	8.66224	-8.31258	4.08788e-08	8.47473e-07	8.59971	PIP	5304
201274_at	-1.54426	6.72255	-8.31244	4.08895e-08	8.47473e-07	8.59945	PSMA5	5686
241259_at	1.12964	4.78406	8.31087	4.10171e-08	8.49474e-07	8.59628	GAB3	139716
210257_x_at	-3.52017	7.50784	-8.3075	4.1291e-08	8.54499e-07	8.58952	CUL4B	8450
223529_at	0.804923	5.0352	8.30311	4.16516e-08	8.60982e-07	8.58069	SYT4	6860
224843_at	0.681051	3.09258	8.30245	4.17062e-08	8.61786e-07	8.57935	SLAIN2	57606
1570025_at	0.981366	5.21909	8.30212	4.17334e-08	8.61844e-07	8.57869	TACC2	10579
220144_s_at	-1.42508	6.49472	-8.30184	4.17563e-08	8.61844e-07	8.57813	ANKEF1	63926
231713_s_at	-1.41213	5.91369	-8.29905	4.19883e-08	8.65001e-07	8.5725	ELP2	55250
211937_at	-1.35767	6.7299	-8.2983	4.20504e-08	8.65954e-07	8.571	EIF4B	1975
219007_at	-1.7551	5.24904	-8.29704	4.21554e-08	8.67789e-07	8.56847	NUP43	348995
1564002_a_at	-0.850226	4.26852	-8.29655	4.2196e-08	8.68297e-07	8.56749	AK9	221264
229881_at	1.40183	4.66127	8.29502	4.23247e-08	8.70563e-07	8.5644	KLF12	11278
241564_at	0.598809	3.03626	8.29486	4.23379e-08	8.70563e-07	8.56408	GLOD5	392465
200643_at	-1.96371	6.32661	-8.29423	4.23905e-08	8.71317e-07	8.56282	HDLBP	3069
1562934_at	1.18182	4.20013	8.29388	4.24198e-08	8.71591e-07	8.56211	LINC02240	101927460
200009_at	-3.00426	7.61101	-8.29263	4.25255e-08	8.73433e-07	8.55959	GDI2	2665
1557541_at	0.886648	3.78862	8.29098	4.26642e-08	8.75626e-07	8.55628	FAM201A	158228
221167_s_at	-3.16318	6.48906	-8.2895	4.27899e-08	8.77876e-07	8.55329	CCDC70	83446
209075_s_at	-2.91238	8.23207	-8.28911	4.28229e-08	8.78122e-07	8.55251	ISCU	23479
235631_at	0.665806	4.80123	8.28898	4.28341e-08	8.78122e-07	8.55224	DDR2	4921
225204_at	3.22657	8.75145	8.2875	4.29596e-08	8.79707e-07	8.54927	PPTC7	160760
204029_at	0.446858	6.18278	8.28689	4.3012e-08	8.80449e-07	8.54803	CELSR2	1952
237463_at	0.716108	6.13639	8.28668	4.303e-08	8.80488e-07	8.5476	ZFPM1	161882
225433_at	-2.15774	5.51772	-8.28595	4.30922e-08	8.8133e-07	8.54614	GTF2A1	2957
208898_at	-3.36387	7.33007	-8.28551	4.31293e-08	8.8133e-07	8.54526	ATP6V1D	51382
219865_at	0.878664	4.81625	8.28544	4.31356e-08	8.8133e-07	8.54511	LINC00339	29092
237280_at	-1.69393	5.72718	-8.28366	4.32882e-08	8.84118e-07	8.54152	TCTE1	202500
212122_at	-2.32733	4.63286	-8.28208	4.34241e-08	8.8623e-07	8.53834	RHOQ	23433
239500_at	0.563742	3.65177	8.28094	4.35218e-08	8.87893e-07	8.53606	EFCAB1	79645
201100_s_at	-1.42379	7.4534	-8.28056	4.35546e-08	8.88232e-07	8.53529	USP9X	8239
202653_s_at	-3.05362	6.28364	-8.27968	4.36312e-08	8.89461e-07	8.53351	2020-03-07	64844
222813_at	0.809697	3.76674	8.27929	4.36648e-08	8.89815e-07	8.53272	ZNF668	79759
1561714_a_at	0.984326	4.3016	8.2762	4.39331e-08	8.94282e-07	8.5265	B3GALNT2	148789
228986_at	0.686192	3.91343	8.27306	4.42078e-08	8.98871e-07	8.52016	OSBPL8	114882
222591_at	0.777198	4.33851	8.27273	4.42366e-08	8.9912e-07	8.51951	STYXL1	51657
200066_at	-2.26626	6.8102	-8.27237	4.42679e-08	8.99423e-07	8.51879	IK	3550
222053_at	1.12813	4.47084	8.27129	4.43633e-08	9.01026e-07	8.5166	TAF6L	10629
241402_at	1.07674	5.73071	8.27045	4.4437e-08	9.02188e-07	8.51491	TSEN54	283989
221824_s_at	-1.0924	6.08363	-8.26979	4.44955e-08	9.02756e-07	8.51358	2020-03-08	220972
226514_at	0.681635	5.4661	8.26957	4.45145e-08	9.02756e-07	8.51314	ZNF71	58491
218164_at	-2.173	8.35401	-8.26103	4.52752e-08	9.16483e-07	8.49592	SPATA20	64847
218403_at	-1.5405	7.00523	-8.25871	4.54847e-08	9.19702e-07	8.49123	TRIAP1	51499
204019_s_at	-2.91924	5.56365	-8.25622	4.57098e-08	9.22967e-07	8.48622	SH3YL1	26751
207507_s_at	-1.54879	6.67107	-8.25618	4.57137e-08	9.22967e-07	8.48613	ATP5MC3	518
215890_at	0.90017	4.99348	8.2554	4.57842e-08	9.24051e-07	8.48456	GM2A	2760
227275_at	0.893497	5.24527	8.25475	4.58436e-08	9.24844e-07	8.48325	MEX3C	51320
200686_s_at	-3.44926	8.77713	-8.2546	4.58574e-08	9.24844e-07	8.48294	SRSF11	9295
239297_at	0.73603	5.08259	8.25142	4.61482e-08	9.30365e-07	8.47652	TRMT9B	57604
1558856_at	1.37609	6.00295	8.24872	4.63966e-08	9.3503e-07	8.47106	DMRTA2	63950
216871_at	0.885973	4.06948	8.24842	4.64243e-08	9.35242e-07	8.47046	ZDHHC17	23390
1562282_at	1.58295	4.22022	8.24809	4.64539e-08	9.35493e-07	8.46981	ZNF568	374900
223857_x_at	-1.10776	7.92097	-8.24733	4.65243e-08	9.36568e-07	8.46827	EMC4	51234
1555439_at	0.568421	3.05642	8.24635	4.66149e-08	9.37736e-07	8.46629	GTF3C3	9330
47773_at	0.968508	5.00156	8.24633	4.66167e-08	9.37736e-07	8.46626	FBXO42	54455
218515_at	-1.56364	5.95183	-8.2461	4.66388e-08	9.37836e-07	8.46578	PAXBP1	94104
236508_at	0.773696	5.03254	8.24564	4.6681e-08	9.37995e-07	8.46486	SLC6A5	9152
228085_at	0.721793	4.25014	8.24248	4.69749e-08	9.4286e-07	8.45848	MMP25-AS1	100507419
212249_at	1.60483	3.6256	8.23962	4.7243e-08	9.47198e-07	8.4527	PIK3R1	5295
205369_x_at	0.76791	4.38126	8.2388	4.732e-08	9.48394e-07	8.45104	DBT	1629
201519_at	-2.20511	6.46685	-8.23508	4.7671e-08	9.5438e-07	8.44353	TOMM70	9868
244864_at	0.950643	5.50996	8.23222	4.79435e-08	9.59484e-07	8.43774	ITGB1-DT	101929475
228277_at	0.872659	4.9411	8.2303	4.81269e-08	9.6245e-07	8.43386	FBXL19	54620
225759_x_at	0.709029	4.56302	8.22948	4.82058e-08	9.62923e-07	8.4322	CLMN	79789
210122_at	-3.5369	10.0075	-8.2291	4.8242e-08	9.62991e-07	8.43143	PRM2	5620
237894_at	-1.74941	6.45634	-8.22827	4.83218e-08	9.63881e-07	8.42975	C3orf22	152065
229877_at	0.668349	3.21018	8.22661	4.84816e-08	9.66362e-07	8.4264	NEO1	4756
201467_s_at	0.640581	4.3487	8.22596	4.85438e-08	9.67249e-07	8.4251	NQO1	1728
206485_at	0.649268	6.16929	8.22285	4.88456e-08	9.72868e-07	8.4188	CD5	921
1556859_a_at	-2.60304	8.48933	-8.2226	4.88703e-08	9.72868e-07	8.41829	PHACTR2-AS1	285740
243529_at	0.950663	5.06347	8.2225	4.88792e-08	9.72868e-07	8.4181	MARS2	92935
205176_s_at	-3.09011	6.95019	-8.22101	4.90252e-08	9.7542e-07	8.41507	ITGB3BP	23421
202719_s_at	-2.435	7.50166	-8.2196	4.9163e-08	9.77806e-07	8.41222	TES	26136
214956_at	0.858518	4.70569	8.21695	4.94227e-08	9.81899e-07	8.40687	AAK1	22848
217969_at	-1.72825	7.29336	-8.21324	4.97891e-08	9.88516e-07	8.39936	VPS51	738
1561719_at	1.02822	3.62098	8.21261	4.98517e-08	9.8931e-07	8.39808	LOC101928196	101928196
243352_at	1.1629	4.59064	8.21051	5.00611e-08	9.92218e-07	8.39383	ALPK1	80216
210142_x_at	-0.644925	7.34003	-8.2092	5.01912e-08	9.94277e-07	8.39119	FLOT1	10211
211783_s_at	-1.64386	5.6215	-8.20891	5.02204e-08	9.94495e-07	8.3906	MTA1	9112
212630_at	-1.41876	7.00924	-8.20827	5.02841e-08	9.95395e-07	8.38931	EXOC3	11336
230035_at	0.837036	4.82302	8.20781	5.03302e-08	9.95738e-07	8.38838	BOC	91653
204587_at	-1.79478	7.44262	-8.20774	5.03378e-08	9.95738e-07	8.38822	SLC25A14	9016
202178_at	-2.31943	8.17143	-8.2071	5.04016e-08	9.96639e-07	8.38694	PRKCZ	5590
211438_at	0.710238	4.4792	8.20651	5.04616e-08	9.97104e-07	8.38573	TRHR	7201
202857_at	-1.74557	6.38009	-8.2063	5.04823e-08	9.97154e-07	8.38531	CNPY2	10330
228945_s_at	0.80879	5.17465	8.20571	5.05417e-08	9.97965e-07	8.38412	SLC39A8	64116
233486_at	0.841767	6.47502	8.20149	5.09688e-08	1.00531e-06	8.37557	LOC101928881	101928881
1553889_at	1.01041	5.86915	8.1996	5.11604e-08	1.00873e-06	8.37175	MRGPRX2	117194
219100_at	-1.23366	5.6969	-8.19852	5.12712e-08	1.01054e-06	8.36956	STN1	79991
224210_s_at	0.67235	4.2125	8.19634	5.14941e-08	1.01457e-06	8.36515	PXMP4	11264
1559142_at	1.32572	3.97683	8.19179	5.19641e-08	1.02273e-06	8.35592	KAT6A	7994
223560_s_at	-2.49899	6.94223	-8.19159	5.19849e-08	1.02277e-06	8.35551	NDUFAF7	55471
218532_s_at	-1.78019	5.98946	-8.19136	5.20085e-08	1.02287e-06	8.35505	RETREG1	54463
208120_x_at	1.69971	8.23914	8.19052	5.2096e-08	1.02422e-06	8.35334	FKSG49	400949
229125_at	1.05523	4.62582	8.18968	5.2183e-08	1.02556e-06	8.35165	KANK4	163782
217054_at	1.17476	6.1254	8.18716	5.24457e-08	1.02998e-06	8.34654	MUC3A	4584
210231_x_at	1.09864	7.57142	8.18506	5.2666e-08	1.03357e-06	8.34229	SET	6418
224431_s_at	0.601826	6.87209	8.18304	5.28784e-08	1.03736e-06	8.3382	KMT5C	84787
210883_x_at	0.759247	5.8955	8.18141	5.30517e-08	1.04039e-06	8.33487	EFNB3	1949
1555837_s_at	-2.65476	7.26159	-8.18101	5.30933e-08	1.04083e-06	8.33407	POLR2B	5431
206976_s_at	-2.76723	6.42258	-8.17854	5.33565e-08	1.04531e-06	8.32905	HSPH1	10808
220755_s_at	-1.32651	8.41949	-8.17496	5.37387e-08	1.05197e-06	8.3218	SNHG32	50854
240200_at	0.53771	5.53094	8.17423	5.38167e-08	1.05275e-06	8.32032	SULT1C2	6819
210879_s_at	-2.50655	8.39034	-8.17119	5.41446e-08	1.05743e-06	8.31415	RAB11FIP5	26056
207380_x_at	0.86826	5.23044	8.16827	5.44613e-08	1.0625e-06	8.30823	NOX1	27035
212371_at	-3.08112	7.77567	-8.16758	5.45363e-08	1.0634e-06	8.30683	DESI2	51029
227359_at	-2.53559	6.69371	-8.16609	5.46988e-08	1.06619e-06	8.3038	OSCP1	127700
206344_at	1.25651	3.77033	8.16529	5.47867e-08	1.06752e-06	8.30217	PON1	5444
1555555_at	0.512207	3.24121	8.16485	5.48353e-08	1.06809e-06	8.30127	BBS9	27241
211522_s_at	0.868205	3.54144	8.16434	5.48911e-08	1.06859e-06	8.30024	GNRHR	2798
226676_at	1.56898	4.17011	8.16416	5.49107e-08	1.06859e-06	8.29988	ZNF521	25925
220365_at	-2.56154	8.13033	-8.16408	5.49198e-08	1.06859e-06	8.29971	ALLC	55821
236561_at	2.33676	8.09567	8.16066	5.52955e-08	1.07485e-06	8.29278	TGFBR1	7046
240065_at	-3.47614	8.63968	-8.16062	5.53006e-08	1.07485e-06	8.29269	FAM81B	153643
1555210_at	0.567702	3.45011	8.1597	5.54018e-08	1.07644e-06	8.29083	DTWD1	56986
228646_at	-1.82274	6.73784	-8.1591	5.54683e-08	1.07713e-06	8.28961	PPP1R1C	151242
209938_at	-2.25232	7.68474	-8.15902	5.54771e-08	1.07713e-06	8.28945	TADA2A	6871
223718_at	-2.05829	7.19621	-8.15846	5.55399e-08	1.07797e-06	8.2883	ACRBP	84519
242579_at	1.45979	4.43183	8.15771	5.56227e-08	1.07881e-06	8.28679	BMPR1B	658
204710_s_at	-1.0497	6.52355	-8.15545	5.58745e-08	1.08254e-06	8.2822	WIPI2	26100
201603_at	-2.46298	5.04572	-8.15397	5.60409e-08	1.08538e-06	8.27917	PPP1R12A	4659
202413_s_at	-3.46832	8.09609	-8.15369	5.60721e-08	1.0856e-06	8.27861	USP1	7398
210032_s_at	-3.67696	7.34635	-8.15189	5.62737e-08	1.08796e-06	8.27496	SPAG6	9576
214628_at	0.821808	6.21098	8.14902	5.65981e-08	1.09308e-06	8.26912	NHLH1	4807
202325_s_at	-3.19023	7.8855	-8.14844	5.66638e-08	1.09385e-06	8.26794	ATP5PF	522
230785_at	0.715775	4.63433	8.14831	5.66779e-08	1.09385e-06	8.26769	SALL3	27164
1552718_at	0.69511	5.82152	8.14728	5.67949e-08	1.09533e-06	8.2656	DTD1	92675
234703_at	0.664189	3.68764	8.14471	5.70876e-08	1.1002e-06	8.26037	HHLA3	11147
242961_x_at	1.57044	5.53372	8.1441	5.71573e-08	1.10115e-06	8.25913	DDX58	23586
230004_at	0.827947	4.66737	8.14336	5.72425e-08	1.1018e-06	8.25762	USP24	23358
1561132_at	0.610787	4.38788	8.14328	5.72513e-08	1.1018e-06	8.25746	DHX35	60625
220168_at	-3.46769	7.07001	-8.14285	5.73011e-08	1.10237e-06	8.25658	CASC1	55259
1554355_a_at	0.752786	3.04665	8.14219	5.73763e-08	1.10343e-06	8.25525	SIAE	54414
226426_at	-2.38272	6.73196	-8.14116	5.74946e-08	1.10493e-06	8.25316	ADNP	23394
240689_at	-2.38335	6.70847	-8.14055	5.75653e-08	1.1059e-06	8.25191	REC114	283677
219651_at	0.446505	3.13212	8.13972	5.76612e-08	1.10735e-06	8.25022	DPPA4	55211
235107_at	1.19707	5.44045	8.13881	5.77662e-08	1.10897e-06	8.24837	PIAS2	9063
211731_x_at	0.990989	5.01837	8.13824	5.78316e-08	1.10926e-06	8.24722	SSX3	10214
206592_s_at	-0.897872	6.41082	-8.13815	5.78419e-08	1.10926e-06	8.24703	AP3D1	8943
240565_at	0.858317	4.91984	8.13662	5.80201e-08	1.11229e-06	8.24391	ZFP28	140612
1569753_at	1.0987	3.96664	8.13631	5.80561e-08	1.11259e-06	8.24328	LOC101928940	101928940
1560131_at	1.31262	5.02202	8.12994	5.88013e-08	1.126e-06	8.23032	LOC100506497	100506497
1552845_at	0.713504	4.29103	8.12917	5.88913e-08	1.12701e-06	8.22877	CLDN15	24146
208627_s_at	-2.16817	6.09131	-8.12608	5.92575e-08	1.13323e-06	8.22247	YBX1	4904
200627_at	-2.50119	6.81166	-8.12145	5.98096e-08	1.14299e-06	8.21305	PTGES3	10728
212921_at	1.10642	4.44894	8.12099	5.9865e-08	1.14308e-06	8.2121	SMYD2	56950
210111_s_at	-3.56621	8.08074	-8.12089	5.98774e-08	1.14308e-06	8.2119	KLHDC10	23008
243505_at	0.623774	3.69006	8.11942	6.00538e-08	1.14528e-06	8.20891	MAP3K3	4215
219454_at	0.734873	4.29525	8.1194	6.00554e-08	1.14528e-06	8.20888	EGFL6	25975
224637_at	-1.9397	6.78233	-8.11712	6.03313e-08	1.14854e-06	8.20422	OST4	100128731
201736_s_at	-2.43964	7.03809	-8.11688	6.03606e-08	1.1487e-06	8.20373	2020-03-06	10299
221871_s_at	0.951986	4.64546	8.11528	6.05542e-08	1.15198e-06	8.20047	TFG	10342
232057_at	0.83746	5.53138	8.1133	6.07953e-08	1.1554e-06	8.19644	SLC7A6OS	84138
1559507_at	0.743351	4.18547	8.1115	6.10148e-08	1.15873e-06	8.19278	LOC100130357	100130357
223178_s_at	2.70426	6.49498	8.11098	6.10785e-08	1.15938e-06	8.19172	NT5DC1	221294
215736_at	0.882587	5.17198	8.11079	6.11013e-08	1.15938e-06	8.19134	KCNV1	27012
207369_at	0.898474	4.53384	8.109	6.13212e-08	1.16253e-06	8.18769	BRS3	680
1563862_at	0.888204	5.39218	8.10821	6.14182e-08	1.16356e-06	8.18608	TCEANC	170082
230776_at	-3.51723	9.00392	-8.10788	6.14594e-08	1.16394e-06	8.1854	RNF157-AS1	100507218
216482_x_at	0.698083	4.05969	8.10726	6.15356e-08	1.16498e-06	8.18414	ZNF79	7633
237943_at	1.18432	4.19435	8.10683	6.15882e-08	1.16534e-06	8.18327	TMCC1	23023
1557756_a_at	2.02843	4.26894	8.10676	6.15972e-08	1.16534e-06	8.18312	CEP128	145508
212509_s_at	-1.59577	6.47257	-8.10366	6.19817e-08	1.17099e-06	8.1768	MXRA7	439921
234680_at	0.670748	5.55317	8.10338	6.20166e-08	1.17125e-06	8.17623	KRTAP17-1	83902
1569608_x_at	-2.24467	6.36605	-8.10315	6.20449e-08	1.17138e-06	8.17576	LOC105379426	105379426
237321_at	0.617092	5.49696	8.10085	6.23314e-08	1.17597e-06	8.17108	MIR3681HG	100506457
221426_s_at	0.654395	5.79621	8.10012	6.24239e-08	1.17731e-06	8.16958	OR3A3	8392
221425_s_at	-2.70531	6.70787	-8.09848	6.26297e-08	1.18079e-06	8.16623	ISCA1	81689
202505_at	-1.7353	4.91623	-8.09814	6.26725e-08	1.18119e-06	8.16554	SNRPB2	6629
202874_s_at	-3.05096	8.73012	-8.09671	6.28518e-08	1.18416e-06	8.16264	ATP6V1C1	528
205543_at	-2.80224	10.3013	-8.0926	6.33726e-08	1.19356e-06	8.15425	HSPA4L	22824
231064_s_at	0.808599	3.87904	8.09099	6.35773e-08	1.19618e-06	8.15097	NUP50	10762
202587_s_at	-2.00167	5.71568	-8.08957	6.37591e-08	1.1987e-06	8.14807	AK1	203
226273_at	1.2329	4.10713	8.08805	6.39539e-08	1.20161e-06	8.14497	CLCN5	1184
220783_at	0.612384	3.89902	8.0853	6.43081e-08	1.20743e-06	8.13936	MMP27	64066
1553466_at	0.874194	5.22756	8.08424	6.44462e-08	1.20939e-06	8.13718	CFAP47	286464
1554628_at	-1.93996	6.02551	-8.08415	6.44567e-08	1.20939e-06	8.13702	ZNF57	126295
219745_at	0.85485	4.82131	8.08245	6.46774e-08	1.21229e-06	8.13354	MFSD13A	79847
237101_at	1.55293	4.02485	8.08092	6.48769e-08	1.21506e-06	8.13041	GHSR	2693
1563657_at	0.805866	4.72006	8.07974	6.50312e-08	1.21683e-06	8.128	PLXND1	23129
222831_at	1.04622	5.08323	8.07941	6.50734e-08	1.2172e-06	8.12734	SAP30L	79685
218936_s_at	-2.45706	5.95655	-8.07887	6.51443e-08	1.21811e-06	8.12624	CCDC59	29080
200075_s_at	-1.62758	5.42366	-8.07735	6.53446e-08	1.22102e-06	8.12312	GUK1	2987
215856_at	1.16559	4.4914	8.07708	6.53797e-08	1.22126e-06	8.12257	SIGLEC15	284266
230968_at	1.09285	4.01709	8.07621	6.54943e-08	1.22236e-06	8.12079	HDAC9	9734
227013_at	-3.04258	7.68389	-8.07429	6.57474e-08	1.22645e-06	8.11687	LATS2	26524
215774_s_at	0.602853	3.42814	8.07405	6.57782e-08	1.22661e-06	8.1164	SUCLG2	8801
219244_s_at	-1.70017	5.91981	-8.07201	6.60498e-08	1.23084e-06	8.11221	MRPL46	26589
212021_s_at	0.766738	5.67256	8.07176	6.60823e-08	1.23102e-06	8.11171	MKI67	4288
1569421_at	0.829664	6.34644	8.07011	6.63016e-08	1.23469e-06	8.10834	CLDN4	1364
235553_at	0.553086	5.76031	8.06623	6.68208e-08	1.24308e-06	8.10042	GAPVD1	26130
235103_at	1.6173	3.49982	8.06536	6.69388e-08	1.24472e-06	8.09863	MAN2A1	4124
226314_at	0.70886	6.01613	8.06524	6.69541e-08	1.24472e-06	8.09839	CHST14	113189
219378_at	-2.89614	6.91157	-8.06391	6.71333e-08	1.24763e-06	8.09568	NAA16	79612
239173_at	1.04737	5.65611	8.06299	6.72576e-08	1.24951e-06	8.0938	PATJ	10207
217918_at	-2.02519	8.68296	-8.0623	6.73514e-08	1.25083e-06	8.09238	DYNLRB1	83658
215455_at	0.965376	4.74263	8.06126	6.74923e-08	1.25291e-06	8.09026	TIMELESS	8914
200608_s_at	-2.89251	5.12018	-8.06114	6.75092e-08	1.25291e-06	8.09	RAD21	5885
235480_at	0.662002	4.19083	8.05993	6.76741e-08	1.25554e-06	8.08752	LOC100506472	100506472
221081_s_at	-1.26598	5.85995	-8.05862	6.78518e-08	1.25841e-06	8.08486	DENND2D	79961
229180_at	0.782469	5.50031	8.05839	6.78842e-08	1.25859e-06	8.08438	WWC1	23286
223853_at	-2.41943	6.44664	-8.05793	6.79462e-08	1.25931e-06	8.08345	BVES	11149
232028_at	0.641978	3.79451	8.05634	6.81648e-08	1.26293e-06	8.08018	ZNF678	339500
202194_at	-3.61946	7.77399	-8.0561	6.81966e-08	1.26309e-06	8.07971	TMED5	50999
220462_at	0.667007	4.17833	8.05582	6.8235e-08	1.26337e-06	8.07914	CSRNP3	80034
208904_s_at	-2.52312	9.56901	-8.05533	6.83032e-08	1.26392e-06	8.07812	RPS28	6234
1555330_at	0.719797	4.80182	8.05528	6.83104e-08	1.26392e-06	8.07802	GCLC	2729
1553218_a_at	0.71515	6.28088	8.05497	6.83522e-08	1.26426e-06	8.0774	ZNF512	84450
215889_at	0.604804	3.5056	8.05329	6.85836e-08	1.26811e-06	8.07396	SKIL	6498
1553568_a_at	0.853258	4.48482	8.05248	6.86961e-08	1.26976e-06	8.0723	HIST1H1T	3010
238349_at	1.10179	4.8914	8.05181	6.87885e-08	1.27104e-06	8.07093	UBN2	254048
215040_at	1.62757	5.52367	8.05043	6.898e-08	1.27415e-06	8.06811	RNASEH2B	79621
230780_at	0.705393	4.79886	8.04865	6.92277e-08	1.27829e-06	8.06446	LINC00886	730091
233343_at	0.703132	3.67342	8.04707	6.94481e-08	1.2814e-06	8.06123	DEFB127	140850
203743_s_at	2.57614	8.84176	8.04483	6.97619e-08	1.28599e-06	8.05665	TDG	6996
218316_at	-1.94975	5.54897	-8.04373	6.99171e-08	1.28754e-06	8.0544	TIMM9	26520
1568977_at	0.830612	4.5195	8.04268	7.00653e-08	1.28941e-06	8.05224	RNASET2	8635
203766_s_at	0.801043	5.12768	8.03968	7.04892e-08	1.2959e-06	8.04612	LMOD1	25802
226769_at	0.644834	4.55733	8.03763	7.0782e-08	1.30084e-06	8.0419	FIBIN	387758
1552930_at	-1.44735	7.14684	-8.03745	7.08068e-08	1.30086e-06	8.04155	MMEL1	79258
223665_at	-2.671	7.18669	-8.03546	7.10914e-08	1.30565e-06	8.03747	ACTRT3	84517
209614_at	1.35612	5.34242	8.03471	7.11988e-08	1.30718e-06	8.03594	ADH1B	125
217338_at	0.872644	3.69222	8.0325	7.15169e-08	1.3117e-06	8.03141	KRT19P2	160313
216980_s_at	0.66077	4.94427	8.03099	7.17346e-08	1.31525e-06	8.02832	SPN	6693
226330_s_at	-2.92331	5.46712	-8.03056	7.17967e-08	1.31572e-06	8.02744	SUPT20H	55578
242146_at	3.84291	7.78233	8.03025	7.18415e-08	1.31589e-06	8.02681	SNRPA1	6627
212547_at	1.89563	7.15716	8.02871	7.20655e-08	1.31911e-06	8.02364	BRD3	8019
238617_at	0.744862	3.63053	8.02577	7.24934e-08	1.32632e-06	8.01763	KIF26B	55083
219590_x_at	0.95128	7.77098	8.02567	7.2508e-08	1.32632e-06	8.01742	DPH5	51611
228070_at	1.37806	6.6313	8.02425	7.27161e-08	1.32968e-06	8.01451	PPP2R5E	5529
242683_at	1.05117	5.50537	8.02145	7.31285e-08	1.33678e-06	8.00877	LINC00668	400643
1555433_at	0.560562	3.36437	8.01958	7.34051e-08	1.34139e-06	8.00493	SLC39A14	23516
225808_at	-2.61542	6.99148	-8.01906	7.34811e-08	1.34232e-06	8.00388	METTL23	124512
235500_at	1.41434	5.79158	8.01724	7.37523e-08	1.34683e-06	8.00014	HNRNPC	3183
201911_s_at	-2.24354	5.6217	-8.01686	7.3809e-08	1.34741e-06	7.99936	FARP1	10160
1569264_at	0.696578	4.8752	8.0155	7.4012e-08	1.35022e-06	7.99657	LOC400655	400655
234929_s_at	-2.45828	6.90835	-8.0148	7.41158e-08	1.35166e-06	7.99514	SPATA7	55812
215692_s_at	1.10295	3.67127	8.01338	7.43289e-08	1.35464e-06	7.99222	MPPED2	744
1557347_at	1.0893	5.00549	8.01292	7.43974e-08	1.35541e-06	7.99129	MCPH1	79648
223445_at	-1.26889	6.0001	-8.01026	7.47981e-08	1.36099e-06	7.98583	DTNBP1	84062
220173_at	-2.91371	6.86769	-8.00755	7.52094e-08	1.36796e-06	7.98026	BBOF1	80127
203087_s_at	-2.73782	6.78308	-8.00639	7.53848e-08	1.37023e-06	7.97789	KIF2A	3796
235152_at	1.42818	4.75685	8.0058	7.54754e-08	1.37142e-06	7.97667	FAM111A-DT	101927204
209222_s_at	-2.30306	6.18592	-8.00526	7.55566e-08	1.37218e-06	7.97558	OSBPL2	9885
236847_at	-2.05542	5.33434	-8.00294	7.5912e-08	1.37798e-06	7.97081	C19orf18	147685
228968_at	0.817255	5.94772	8.00185	7.60799e-08	1.38057e-06	7.96857	ZNF449	203523
210254_at	1.62682	4.30151	8.0002	7.63326e-08	1.38424e-06	7.9652	MS4A3	932
224318_s_at	-2.84829	8.56166	-7.99991	7.63782e-08	1.3845e-06	7.96459	KANSL3	55683
202001_s_at	-3.0196	7.23422	-7.99549	7.70639e-08	1.39519e-06	7.95551	NDUFA6	4700
1560988_a_at	0.675218	3.77431	7.99347	7.73777e-08	1.39948e-06	7.95138	LINC00556	100861551
206118_at	-1.95471	7.17266	-7.99323	7.74164e-08	1.39972e-06	7.95087	STAT4	6775
201697_s_at	-1.54744	5.01856	-7.99	7.79231e-08	1.40748e-06	7.94424	DNMT1	1786
207523_at	-2.63616	6.3038	-7.98509	7.87002e-08	1.41917e-06	7.93416	TSBP1	10665
1563725_at	0.780393	4.01945	7.98462	7.87758e-08	1.42007e-06	7.93319	ZNF583	147949
1557964_at	0.614485	6.41361	7.98352	7.89509e-08	1.42229e-06	7.93093	EIF4G2	1982
236939_at	0.763896	3.80238	7.98288	7.90521e-08	1.4231e-06	7.92963	HACD4	401494
220367_s_at	-2.72638	7.07526	-7.98274	7.90746e-08	1.4231e-06	7.92934	SAP130	79595
209185_s_at	-1.99531	6.90698	-7.98258	7.91001e-08	1.4231e-06	7.92901	IRS2	8660
208460_at	0.533245	4.43669	7.98214	7.91709e-08	1.42391e-06	7.9281	GJC1	10052
201652_at	-3.92586	8.49464	-7.98124	7.93155e-08	1.42557e-06	7.92625	COPS5	10987
217797_at	-2.9763	8.07339	-7.97938	7.96141e-08	1.43046e-06	7.92243	UFC1	51506
1554911_at	1.11733	6.52224	7.97834	7.97823e-08	1.43224e-06	7.92029	ABCC11	85320
238481_at	0.681614	2.99582	7.97816	7.98115e-08	1.43224e-06	7.91992	MGP	4256
229967_at	-2.75135	11.1545	-7.97812	7.9818e-08	1.43224e-06	7.91983	CMTM2	146225
238063_at	1.29756	4.39257	7.97646	8.00867e-08	1.4366e-06	7.91642	TMEM154	201799
217840_at	-0.60518	4.61351	-7.97316	8.06224e-08	1.44383e-06	7.90965	DDX41	51428
232435_at	0.761191	4.91873	7.97289	8.06669e-08	1.44416e-06	7.90908	ALG13	79868
214054_at	0.516993	5.01625	7.97006	8.11294e-08	1.45101e-06	7.90328	DOK2	9046
223609_at	-3.35562	8.97325	-7.96769	8.15205e-08	1.45735e-06	7.89839	ROPN1L	83853
1568896_at	0.375996	2.96589	7.96662	8.16975e-08	1.45974e-06	7.89619	STXBP5L	9515
203554_x_at	-3.1962	9.28885	-7.96319	8.22665e-08	1.46943e-06	7.88913	PTTG1	9232
201481_s_at	0.805796	5.56432	7.95892	8.29804e-08	1.48073e-06	7.88036	PYGB	5834
234950_s_at	-1.72725	6.02131	-7.95834	8.30783e-08	1.48151e-06	7.87916	COP1	64326
1554302_s_at	0.607613	3.62244	7.95793	8.3147e-08	1.48225e-06	7.87832	LHFPL3-AS1	645591
1561884_at	0.929488	4.16963	7.95728	8.32569e-08	1.48373e-06	7.87698	CEPT1	10390
235154_at	-1.02171	6.02727	-7.9555	8.35574e-08	1.48811e-06	7.87332	TAF3	83860
221478_at	-3.05659	6.39874	-7.95444	8.37376e-08	1.49084e-06	7.87113	BNIP3L	665
230193_at	-2.89924	6.39849	-7.95405	8.38029e-08	1.49148e-06	7.87033	WDR66	144406
217755_at	-2.57865	7.07172	-7.9539	8.38284e-08	1.49148e-06	7.87003	JPT1	51155
209437_s_at	0.637794	5.49612	7.95204	8.41453e-08	1.49614e-06	7.86619	SPON1	10418
209265_s_at	-2.34615	6.77858	-7.95073	8.43699e-08	1.49965e-06	7.86348	METTL3	56339
203656_at	-1.17859	6.38685	-7.94823	8.47981e-08	1.50501e-06	7.85834	FIG4	9896
1561352_at	0.930279	4.11531	7.94816	8.48091e-08	1.50501e-06	7.85821	LINC01204	101927528
223751_x_at	0.964206	4.98266	7.94751	8.49214e-08	1.50603e-06	7.85686	TLR10	81793
211920_at	0.599232	5.4118	7.94704	8.50032e-08	1.50699e-06	7.85589	CFB	629
222430_s_at	-2.44557	8.35637	-7.94478	8.53925e-08	1.51326e-06	7.85124	YTHDF2	51441
241779_at	0.841064	5.50822	7.9439	8.55462e-08	1.51419e-06	7.84942	MTX3	345778
218985_at	-1.31394	7.31093	-7.94389	8.55479e-08	1.51419e-06	7.8494	SLC2A8	29988
208887_at	-1.7327	6.49573	-7.94276	8.57434e-08	1.51667e-06	7.84708	EIF3G	8666
219192_at	-2.69385	8.90822	-7.93741	8.66788e-08	1.53222e-06	7.83605	UBAP2	55833
237045_at	0.830208	5.12064	7.93667	8.68085e-08	1.53402e-06	7.83453	FAM91A1	157769
210547_x_at	-2.00664	7.34803	-7.93625	8.6883e-08	1.53444e-06	7.83366	ICA1	3382
204467_s_at	1.28431	5.2017	7.93622	8.68882e-08	1.53444e-06	7.8336	SNCA	6622
35265_at	0.692918	5.4968	7.93508	8.70898e-08	1.53736e-06	7.83125	FXR2	9513
238660_at	0.949944	7.04319	7.93496	8.71103e-08	1.53736e-06	7.83101	WDFY3	23001
230976_at	-0.89088	5.90094	-7.93368	8.73365e-08	1.54036e-06	7.82837	AK8	158067
221516_s_at	2.34227	11.2787	7.93191	8.76518e-08	1.54543e-06	7.82471	MIEF1	54471
237509_at	0.542357	3.84797	7.93082	8.78446e-08	1.54832e-06	7.82248	LINC01616	106456574
208921_s_at	-1.9485	6.58439	-7.9283	8.82964e-08	1.55529e-06	7.81727	SRI	6717
221611_s_at	-3.00862	9.61494	-7.9272	8.84926e-08	1.55724e-06	7.81501	PHF7	51533
232543_x_at	-1.45245	5.84962	-7.92627	8.86603e-08	1.55918e-06	7.81309	ARHGAP9	64333
225207_at	-5.09497	7.2733	-7.92302	8.92475e-08	1.56901e-06	7.80638	PDK4	5166
204485_s_at	-2.65977	5.33956	-7.92226	8.93859e-08	1.57093e-06	7.80481	TOM1L1	10040
217768_at	-3.50483	8.57507	-7.92094	8.96244e-08	1.57462e-06	7.8021	RTRAF	51637
1562130_at	0.553665	3.36235	7.92033	8.97369e-08	1.5759e-06	7.80082	IQCA1	79781
210817_s_at	-1.54504	7.60749	-7.9197	8.98515e-08	1.57709e-06	7.79953	CALCOCO2	10241
201084_s_at	-3.03236	7.14467	-7.91944	8.98981e-08	1.5774e-06	7.799	BCLAF1	9774
206005_s_at	-2.63488	5.89816	-7.91927	8.99285e-08	1.57743e-06	7.79866	CEP162	22832
213526_s_at	-1.14623	3.60394	-7.91731	9.02888e-08	1.58324e-06	7.79459	LIN37	55957
207974_s_at	-3.48689	7.12721	-7.91629	9.04756e-08	1.58601e-06	7.7925	SKP1	6500
220926_s_at	1.29651	4.41128	7.91495	9.07217e-08	1.58945e-06	7.78974	EDEM3	80267
214807_at	1.4903	3.84935	7.91467	9.07732e-08	1.58945e-06	7.78916	PLXDC2	84898
216185_at	0.545004	3.1172	7.91459	9.07881e-08	1.58945e-06	7.78899	FUT9	10690
239461_at	1.47031	4.12824	7.91385	9.09252e-08	1.59134e-06	7.78746	GALNT15	117248
241842_x_at	-1.2894	5.80487	-7.91357	9.09768e-08	1.59173e-06	7.78688	TEX45	374877
231096_at	-2.97781	6.92848	-7.91244	9.11863e-08	1.59489e-06	7.78455	PCAT4	118425
202963_at	-1.07819	5.4746	-7.90868	9.18849e-08	1.60608e-06	7.77679	RFX5	5993
220622_at	0.558329	3.39516	7.90825	9.19653e-08	1.60697e-06	7.7759	LRRC31	79782
230724_s_at	1.14142	4.76963	7.90801	9.20112e-08	1.60726e-06	7.7754	NKAPD1	55216
241137_at	0.796338	4.42771	7.90758	9.20906e-08	1.60813e-06	7.77452	MUCL3	135656
235688_s_at	1.20896	5.34765	7.90629	9.23321e-08	1.61183e-06	7.77186	TRAF4	9618
217939_s_at	-1.43732	7.45209	-7.90426	9.27148e-08	1.61676e-06	7.76766	AFTPH	54812
244825_at	0.646713	5.3374	7.90416	9.27328e-08	1.61676e-06	7.76746	SHROOM4	57477
242937_at	0.892489	4.75606	7.90236	9.30738e-08	1.6216e-06	7.76373	FOXK2	3607
222867_s_at	-1.18654	7.15528	-7.90065	9.33976e-08	1.62524e-06	7.7602	MED31	51003
240209_at	-3.53336	7.3346	-7.89757	9.39837e-08	1.63367e-06	7.75385	C16orf78	123970
1556319_at	0.710899	3.78085	7.8963	9.42271e-08	1.63707e-06	7.75122	TRIM44	54765
225869_s_at	0.666954	4.70189	7.89526	9.44262e-08	1.64001e-06	7.74907	UNC93B1	81622
1558995_at	0.714906	4.13346	7.89498	9.44805e-08	1.64043e-06	7.74849	ZNF547	284306
223223_at	-1.98059	6.18766	-7.89119	9.52127e-08	1.65157e-06	7.74065	ARV1	64801
242571_at	0.373326	3.03353	7.88932	9.55738e-08	1.65731e-06	7.7368	REPS2	9185
225076_s_at	-0.902505	6.84157	-7.88871	9.56936e-08	1.65886e-06	7.73553	ZNFX1	57169
213807_x_at	0.747524	5.13526	7.888	9.58315e-08	1.65987e-06	7.73406	MET	4233
210541_s_at	0.757105	4.54136	7.88794	9.58426e-08	1.65987e-06	7.73395	TRIM27	5987
1569557_at	0.894709	5.97049	7.88767	9.58967e-08	1.66028e-06	7.73337	ZNF248	57209
204755_x_at	0.957324	3.53203	7.88721	9.59862e-08	1.6613e-06	7.73243	HLF	3131
225396_at	-0.774967	4.1413	-7.88629	9.61662e-08	1.66389e-06	7.73052	RBBP4	5928
205714_s_at	-1.57967	6.29242	-7.88549	9.63217e-08	1.66559e-06	7.72888	ZMYND10	51364
208764_s_at	-1.90385	6.12377	-7.88383	9.66489e-08	1.67013e-06	7.72544	ATP5MC2	517
208799_at	-1.38996	7.09585	-7.88352	9.67091e-08	1.67043e-06	7.7248	PSMB5	5693
216030_s_at	-5.88785	6.68731	-7.88343	9.67278e-08	1.67043e-06	7.72461	SEMG2	6407
1560826_at	1.23457	5.94984	7.88155	9.70977e-08	1.67576e-06	7.72073	LOC101929398	101929398
207082_at	0.770941	6.17258	7.87886	9.76305e-08	1.68443e-06	7.71517	CSF1	1435
203460_s_at	-2.57736	6.05776	-7.8782	9.77621e-08	1.68511e-06	7.7138	PSEN1	5663
225870_s_at	-1.89726	6.67924	-7.87804	9.77936e-08	1.68511e-06	7.71347	TRAPPC5	126003
238636_at	0.937635	4.50589	7.87713	9.79768e-08	1.68702e-06	7.71157	CACNA1C	775
1552848_a_at	1.16624	3.89501	7.8757	9.82615e-08	1.68951e-06	7.70862	PTCHD1	139411
200748_s_at	-4.0669	7.78158	-7.87511	9.83808e-08	1.69097e-06	7.70739	FTH1	2495
201098_at	-1.61878	5.4117	-7.87437	9.85282e-08	1.69218e-06	7.70587	COPB2	9276
229540_at	0.995645	4.07566	7.87429	9.85441e-08	1.69218e-06	7.70571	RBPJ	3516
1560587_s_at	-2.37679	6.39182	-7.8738	9.86423e-08	1.69251e-06	7.70469	PRDX5	25824
233087_at	2.04888	3.80076	7.87373	9.86563e-08	1.69251e-06	7.70455	FBXL17	64839
205365_at	0.474867	4.51536	7.86943	9.95256e-08	1.70475e-06	7.69564	HOXB6	3216
1558310_s_at	1.17264	3.8228	7.86884	9.96452e-08	1.70626e-06	7.69442	LOC100132356	100132356
1552993_at	-3.64316	5.5432	-7.86786	9.98439e-08	1.70913e-06	7.69239	DYDC1	143241
235244_at	0.90222	3.68221	7.86668	1.00084e-07	1.71166e-06	7.68996	CCDC58	131076
202205_at	0.678469	5.15272	7.86583	1.00258e-07	1.71408e-06	7.68819	VASP	7408
218793_s_at	-2.61322	5.97412	-7.8638	1.00673e-07	1.7201e-06	7.68399	SCML1	6322
238045_at	0.447371	3.70662	7.86317	1.00803e-07	1.72177e-06	7.68268	TMEM65	157378
210999_s_at	-2.0823	7.26382	-7.85917	1.01629e-07	1.73533e-06	7.67439	GRB10	2887
235020_at	0.824661	3.99375	7.85722	1.02032e-07	1.74168e-06	7.67037	TAF4B	6875
208683_at	-2.3929	7.26795	-7.85632	1.02221e-07	1.74419e-06	7.66849	CAPN2	824
222753_s_at	-1.26813	5.42217	-7.85621	1.02243e-07	1.74419e-06	7.66827	SPCS3	60559
1555372_at	1.72601	9.53154	7.85572	1.02345e-07	1.74539e-06	7.66726	BCL2L11	10018
231565_at	-3.68315	6.28688	-7.8554	1.02412e-07	1.74598e-06	7.66659	CFAP299	255119
1554258_a_at	-3.51692	8.88238	-7.8524	1.03041e-07	1.75616e-06	7.66037	DNAJC5B	85479
221169_s_at	1.19195	4.16831	7.85123	1.03287e-07	1.75981e-06	7.65794	HRH4	59340
201317_s_at	-2.19572	6.17312	-7.85077	1.03384e-07	1.76036e-06	7.657	PSMA2	5683
206596_s_at	0.753416	4.07584	7.84958	1.03635e-07	1.76353e-06	7.65453	NRL	4901
201400_at	-0.59019	5.24007	-7.84684	1.04216e-07	1.77122e-06	7.64885	PSMB3	5691
201252_at	-1.16416	5.45544	-7.84586	1.04424e-07	1.7742e-06	7.64682	PSMC4	5704
206734_at	0.494757	3.09614	7.84077	1.05516e-07	1.7883e-06	7.63626	JRKL	8690
222632_s_at	-2.70299	7.41954	-7.84031	1.05615e-07	1.78944e-06	7.6353	LZTFL1	54585
210430_x_at	0.779384	5.77297	7.83657	1.06424e-07	1.80203e-06	7.62755	RHD	6007
200675_at	-2.39521	6.00406	-7.8355	1.06656e-07	1.80372e-06	7.62534	CD81	975
202703_at	-1.44828	5.6504	-7.83465	1.06842e-07	1.8063e-06	7.62357	DUSP11	8446
1557873_at	0.631061	5.46455	7.83394	1.06997e-07	1.80837e-06	7.62209	LOC102546294	102546294
219502_at	1.0145	3.94529	7.83279	1.0725e-07	1.81208e-06	7.6197	NEIL3	55247
1555298_a_at	-3.16864	7.5751	-7.82932	1.08011e-07	1.82381e-06	7.61251	VWA3B	200403
232930_at	0.894546	4.08685	7.82808	1.08285e-07	1.82787e-06	7.60994	DOCK1	1793
243140_at	0.607846	3.57274	7.82704	1.08515e-07	1.83062e-06	7.60778	ACTA2	59
1553708_at	0.882459	3.87489	7.82662	1.08609e-07	1.83107e-06	7.60691	LINC00525	84847
243875_at	-3.03315	8.20063	-7.8258	1.08792e-07	1.83304e-06	7.60519	CCDC158	339965
216481_at	0.768343	6.17454	7.82201	1.09638e-07	1.84558e-06	7.59733	GRIP2	80852
217568_at	-3.56721	6.66138	-7.81935	1.10234e-07	1.8539e-06	7.59182	EDDM3A	10876
208337_s_at	0.70181	3.87682	7.81716	1.10729e-07	1.86166e-06	7.58726	NR5A2	2494
204690_at	-2.49458	8.59239	-7.8141	1.11423e-07	1.87103e-06	7.58091	STX8	9482
216183_at	0.974197	4.92131	7.81231	1.11832e-07	1.8756e-06	7.57719	TGM2	7052
215688_at	0.797209	4.38437	7.80971	1.1243e-07	1.88446e-06	7.57178	RASGRF1	5923
1570251_at	0.764958	4.16213	7.80729	1.12987e-07	1.89238e-06	7.56676	HECTD1	25831
31861_at	1.0091	7.57106	7.80721	1.13006e-07	1.89238e-06	7.56658	IGHMBP2	3508
223086_x_at	-2.70737	6.86817	-7.80644	1.13185e-07	1.89479e-06	7.56498	MRPL51	51258
214224_s_at	-2.0776	7.37137	-7.8046	1.1361e-07	1.90074e-06	7.56117	PIN4	5303
200665_s_at	-2.27207	6.09757	-7.80322	1.13932e-07	1.90555e-06	7.55829	SPARC	6678
210331_at	1.17903	5.20933	7.80272	1.14049e-07	1.90635e-06	7.55725	HECW1	23072
1564683_at	0.830057	5.75802	7.8026	1.14078e-07	1.90635e-06	7.557	TBL3	10607
239392_s_at	1.18084	3.39085	7.80242	1.14118e-07	1.90635e-06	7.55664	POGK	57645
1567253_at	0.993441	5.39604	7.80242	1.1412e-07	1.90635e-06	7.55662	OR10D3	26497
221625_at	1.32855	3.81357	7.80199	1.1422e-07	1.9068e-06	7.55573	ZNF506	440515
210831_s_at	0.454015	4.62969	7.80174	1.14277e-07	1.9068e-06	7.55522	PTGER3	5733
218586_at	-2.40276	7.55356	-7.8017	1.14286e-07	1.9068e-06	7.55514	MRGBP	55257
224366_s_at	-1.28951	5.69392	-7.80131	1.14377e-07	1.90774e-06	7.55433	REPS1	85021
216231_s_at	-4.10218	7.24991	-7.79976	1.14742e-07	1.91325e-06	7.55109	B2M	567
225148_at	-0.870135	6.43189	-7.7981	1.15131e-07	1.91801e-06	7.54766	RPS19BP1	91582
1558324_a_at	-1.80912	6.23479	-7.79809	1.15133e-07	1.91801e-06	7.54764	TMEM72	643236
212596_s_at	-2.5763	7.20092	-7.79542	1.15767e-07	1.92682e-06	7.54206	HMGXB4	10042
1557684_at	1.44668	4.54433	7.7953	1.15793e-07	1.92682e-06	7.54183	ZNF286A	57335
201336_at	-2.30394	7.08755	-7.79526	1.15803e-07	1.92682e-06	7.54175	VAMP3	9341
51146_at	-2.86598	7.08402	-7.79395	1.16114e-07	1.93141e-06	7.53902	PIGV	55650
202477_s_at	-0.637063	4.8914	-7.79099	1.16821e-07	1.9414e-06	7.53285	TUBGCP2	10844
215219_at	0.478493	3.53727	7.78865	1.17383e-07	1.95014e-06	7.52798	DOP1B	9980
239421_at	0.76375	4.16468	7.78821	1.17487e-07	1.95128e-06	7.52707	DLGAP1-AS1	649446
231137_at	0.678152	4.96492	7.78726	1.17716e-07	1.95389e-06	7.5251	IDH3A	3419
1553599_a_at	-1.89554	6.48354	-7.78704	1.17768e-07	1.95417e-06	7.52465	SYCP3	50511
1557443_s_at	2.25433	4.97828	7.78356	1.18612e-07	1.96519e-06	7.51739	LINC02148	100505811
233349_at	0.456837	3.42618	7.78252	1.18866e-07	1.96745e-06	7.51522	TLK2	11011
200967_at	-1.85459	4.66649	-7.78239	1.18896e-07	1.96745e-06	7.51497	PPIB	5479
209285_s_at	-1.23436	3.90268	-7.78226	1.18928e-07	1.96745e-06	7.51469	TASOR	23272
216919_at	0.96382	6.0795	7.78191	1.19014e-07	1.96828e-06	7.51395	TP53I11	9537
242626_at	1.21061	4.61403	7.78149	1.19116e-07	1.96929e-06	7.51309	SAMD5	389432
235486_at	0.68688	4.20534	7.78111	1.19208e-07	1.96929e-06	7.5123	KIAA1549L	25758
228052_x_at	0.581888	5.65769	7.78107	1.1922e-07	1.96929e-06	7.5122	TCF3	6929
220868_s_at	0.603738	4.31234	7.77903	1.19718e-07	1.97655e-06	7.50797	SLC7A10	56301
219709_x_at	-1.28532	5.38137	-7.77897	1.19732e-07	1.97655e-06	7.50785	FAM173A	65990
201192_s_at	-2.03038	6.2499	-7.77753	1.20086e-07	1.9818e-06	7.50485	PITPNA	5306
1559213_at	0.60955	3.16864	7.77699	1.2022e-07	1.98341e-06	7.50372	LINC01419	103352670
227316_at	0.510879	3.5309	7.77591	1.20485e-07	1.98719e-06	7.50148	PET117	100303755
243495_s_at	1.61461	4.96267	7.77522	1.20658e-07	1.98944e-06	7.50002	ZNF652	22834
[truncated: 13,177 more rows]

## Sheet: GSE6967
	logFC	AveExpr	t	P.Value	adj.P.Val	B
FOPNL	-1.04641	7.1142	-20.2731	7.30065e-11	9.07836e-07	14.673
NUB1	-1.55703	7.41144	-18.4572	2.25119e-10	1.39968e-06	13.774
ACAP2	-1.7896	7.60061	-16.3276	9.69952e-10	3.21465e-06	12.5489
DOHH	1.42864	7.73846	16.2397	1.03406e-09	3.21465e-06	12.4938
SPEN	-1.97059	7.76248	-15.6714	1.57623e-09	3.92009e-06	12.1282
LRBA	-1.86218	7.45869	-15.0335	2.57329e-09	4.58444e-06	11.6973
OPTN	-2.70505	11.7636	-15.0298	2.58071e-09	4.58444e-06	11.6947
NDUFB5	-1.49577	7.17959	-14.3576	4.41685e-09	6.86544e-06	11.2154
LDHB	-1.51159	7.54218	-14.059	5.64856e-09	7.62796e-06	10.9937
EIF2D	-1.33073	7.31027	-13.9601	6.13427e-09	7.62796e-06	10.9191
SEPHS2	-0.923247	7.20305	-13.7692	7.20376e-09	8.14352e-06	10.7732
PAN3	-1.96178	7.68536	-13.1042	1.28114e-08	1.32758e-05	10.246
SLC35A1	-1.29854	7.09083	-12.6882	1.86084e-08	1.62485e-05	9.90061
GSTA4	-0.675064	6.76418	-12.6339	1.95534e-08	1.62485e-05	9.85457
EPHX2	-0.903543	6.97095	-12.6312	1.96001e-08	1.62485e-05	9.85235
ARCN1	-0.804729	7.0371	-12.0363	3.41402e-08	2.65333e-05	9.33329
AACS	-0.633354	6.97452	-11.7775	4.37839e-08	3.20266e-05	9.09877
AHSA2	-0.866543	7.23316	-11.7093	4.67836e-08	3.23197e-05	9.03613
TNS3	-0.821015	7.00222	-11.4054	6.3123e-08	4.01354e-05	8.75201
XPO5	-0.801129	7.10724	-11.3285	6.81709e-08	4.01354e-05	8.6788
YIPF4	-1.671	7.60958	-11.3245	6.84465e-08	4.01354e-05	8.67495
TMEM60	-1.9609	7.77551	-11.2149	7.64303e-08	4.01354e-05	8.56979
ARPC2	-1.38212	11.8531	-11.2098	7.68216e-08	4.01354e-05	8.56492
CLDN11	-1.29131	7.07778	-11.171	7.99035e-08	4.01354e-05	8.52738
ATAD2	-1.92767	7.55012	-11.1613	8.06904e-08	4.01354e-05	8.51802
UBXN4	-1.92234	7.656	-11.0098	9.41907e-08	4.50485e-05	8.3701
RPL31	-3.03951	9.62591	-10.9536	9.9793e-08	4.59602e-05	8.31477
ARPC1A	-1.37056	7.48007	-10.9013	1.05329e-07	4.67772e-05	8.26301
RFX5	-0.816332	7.10438	-10.7533	1.22871e-07	5.18363e-05	8.11509
PRNP	-1.67133	7.48878	-10.7284	1.26123e-07	5.18363e-05	8.08997
TRAM1	-2.80336	8.03467	-10.7052	1.29226e-07	5.18363e-05	8.06659
ENOPH1	-1.07012	7.02742	-10.5138	1.58251e-07	6.14952e-05	7.87135
PRDX6	-1.7251	7.27703	-10.4732	1.65255e-07	6.2271e-05	7.82955
GTF2B	-1.28846	7.05211	-10.3976	1.79226e-07	6.25651e-05	7.75113
RPL3	-3.36056	10.4771	-10.3936	1.79996e-07	6.25651e-05	7.74698
MRPL20	-1.97383	8.17631	-10.381	1.82458e-07	6.25651e-05	7.73384
SLTM	-1.31708	7.12441	-10.3623	1.86161e-07	6.25651e-05	7.71442
SAV1	-0.748961	6.78092	-10.2815	2.03173e-07	6.59645e-05	7.62977
RPS3A	-2.95634	10.2852	-10.2419	2.12127e-07	6.59645e-05	7.58799
UBP1	-0.736021	7.0331	-10.2416	2.1219e-07	6.59645e-05	7.5877
PSMB1	-2.6946	8.10002	-10.1362	2.38116e-07	7.22188e-05	7.4759
SNIP1	-0.968196	7.00779	-10.0788	2.53651e-07	7.39639e-05	7.41452
SLC35E2B	-0.763831	7.04112	-10.0535	2.60826e-07	7.39639e-05	7.38742
ERAP2	2.00348	12.2567	10.0504	2.61714e-07	7.39639e-05	7.38412
DKC1	-1.15653	7.08293	-10.0041	2.7549e-07	7.4532e-05	7.33424
XPO4	-0.764545	7.01215	-10.0016	2.76257e-07	7.4532e-05	7.33153
ICE1	-0.702508	6.77212	-9.98403	2.81705e-07	7.4532e-05	7.31254
POLD3	-2.22917	9.0208	-9.94665	2.93675e-07	7.53419e-05	7.27204
CMAS	-1.6194	7.57641	-9.9369	2.96884e-07	7.53419e-05	7.26146
ATP6V1B2	-2.12926	7.81013	-9.9029	3.08379e-07	7.66939e-05	7.22447
ZMAT3	1.72004	12.7185	9.86195	3.22859e-07	7.87207e-05	7.17976
LACTB	-3.55182	9.1164	-9.84298	3.29811e-07	7.88692e-05	7.159
MKRN2	-0.500067	6.89446	-9.80191	3.45421e-07	8.10437e-05	7.1139
ZNF106	-0.902662	6.92106	-9.77159	3.57454e-07	8.14015e-05	7.08049
RPL34	-0.855352	6.91247	-9.76521	3.60039e-07	8.14015e-05	7.07346
SEC11A	-3.57662	11.4757	-9.71224	3.82322e-07	8.48959e-05	7.01483
SLC35G5	2.18986	8.9083	9.65921	4.06114e-07	8.76407e-05	6.95584
TCEAL8	-1.25007	7.45331	-9.65125	4.09819e-07	8.76407e-05	6.94696
EEF1G	-2.33515	11.6176	-9.63851	4.15826e-07	8.76407e-05	6.93274
NASP	3.77643	9.43712	9.53635	4.67553e-07	9.69003e-05	6.81802
PAIP2	-1.51183	7.20946	-9.5167	4.78266e-07	9.74957e-05	6.79584
ISCA2	-2.49661	8.45783	-9.49235	4.91911e-07	9.75144e-05	6.76828
GLOD4	-1.11846	7.31872	-9.48862	4.94041e-07	9.75144e-05	6.76405
EIF3D	-1.49914	7.42177	-9.46677	5.06697e-07	9.84496e-05	6.73926
FERMT2	-1.66772	7.56664	-9.34938	5.80929e-07	0.000110101	6.60516
ALG2	-1.50162	7.35923	-9.34432	5.84375e-07	0.000110101	6.59935
NFXL1	-2.22858	7.50554	-9.31341	6.05935e-07	0.00011246	6.56378
SLC36A4	-0.469957	6.82421	-9.29688	6.17818e-07	0.000112979	6.5447
DDAH1	-1.67405	7.49672	-9.27441	6.34362e-07	0.000112997	6.51874
ANTXR1	-0.469085	6.85524	-9.25855	6.46328e-07	0.000112997	6.50037
FAM175B	-0.919886	7.00251	-9.25175	6.51532e-07	0.000112997	6.49249
LAMTOR3	-1.15937	7.12466	-9.24364	6.57796e-07	0.000112997	6.48309
COX7A2L	-0.569994	6.95338	-9.23652	6.63353e-07	0.000112997	6.47482
HSPBAP1	-1.05082	7.02476	-9.18793	7.02619e-07	0.000118068	6.41826
PARL	-1.85953	7.82932	-9.17231	7.15766e-07	0.000118167	6.40002
RSL24D1	-3.38412	8.34307	-9.13193	7.50982e-07	0.000118167	6.35275
PPP2R5A	-0.621638	7.07105	-9.1204	7.61372e-07	0.000118167	6.33922
HMGN4	-0.860266	7.01839	-9.11986	7.61865e-07	0.000118167	6.33858
IQCK	-1.96123	7.68589	-9.11208	7.68971e-07	0.000118167	6.32944
TBP	-1.90575	7.53352	-9.11123	7.6975e-07	0.000118167	6.32844
REEP5	-1.20484	7.3289	-9.10338	7.76996e-07	0.000118167	6.31922
RPL6	-2.12885	7.7961	-9.10099	7.79225e-07	0.000118167	6.3164
NUP93	-1.44373	7.24058	-9.07322	8.0553e-07	0.000118302	6.28369
TXNDC12	-2.11156	7.96293	-9.06868	8.09922e-07	0.000118302	6.27833
RBL2	-1.59689	7.79513	-9.05762	8.20728e-07	0.000118302	6.26527
CCDC113	-1.64017	7.44662	-9.05184	8.26445e-07	0.000118302	6.25843
MRPL17	-1.11612	7.31575	-9.05059	8.27685e-07	0.000118302	6.25696
S100PBP	-0.819886	6.93067	-9.02668	8.51785e-07	0.000120363	6.22866
XPNPEP3	0.599246	15.0135	9.00029	8.79274e-07	0.000122851	6.19735
PUM2	-1.11278	7.45067	-8.96833	9.13837e-07	0.000126262	6.15932
NSMCE2	-0.497551	6.86873	-8.93024	9.56929e-07	0.000129974	6.11385
GMPR2	-0.63505	7.0504	-8.91732	9.72034e-07	0.000129974	6.09839
ANKRD50	-0.764316	6.9795	-8.9173	9.72062e-07	0.000129974	6.09836
RPS7	-4.08779	10.9306	-8.90221	9.90037e-07	0.00013078	6.08027
MRPS14	-1.69303	7.68435	-8.88775	1.00759e-06	0.00013078	6.06292
RPS10	-1.80283	9.78608	-8.88607	1.00964e-06	0.00013078	6.06091
MKRN1	-2.54255	12.5463	-8.86135	1.04049e-06	0.000133387	6.03117
HNRNPF	-0.448571	6.87176	-8.84017	1.06773e-06	0.000134392	6.00564
MFSD14B	-0.598587	6.84952	-8.83121	1.07949e-06	0.000134392	5.99482
RPL24	-2.97573	9.61828	-8.82851	1.08304e-06	0.000134392	5.99157
RNF34	-1.80479	7.47528	-8.8221	1.09157e-06	0.000134392	5.98382
DAP3	-1.383	7.4867	-8.8107	1.1069e-06	0.000134944	5.97004
DUSP22	-1.25485	7.445	-8.76902	1.16495e-06	0.000140642	5.91949
POLR1B	-0.574362	6.86189	-8.69957	1.26902e-06	0.000151733	5.83483
NDN	-0.456191	6.85085	-8.67382	1.31009e-06	0.000154171	5.8033
SMAD4	-0.607337	6.85273	-8.67129	1.3142e-06	0.000154171	5.8002
RCOR3	-1.07104	7.1409	-8.60503	1.42694e-06	0.000165832	5.71866
GPC2	3.88752	10.8494	8.58757	1.45834e-06	0.0001676	5.69709
CD47	-1.85348	7.51375	-8.58167	1.46911e-06	0.0001676	5.68979
EIF2S1	-1.19984	7.03084	-8.56701	1.49627e-06	0.000169146	5.67164
MRPS9	-2.18015	7.74649	-8.52997	1.56726e-06	0.000174051	5.62567
EEF1AKMT1	-0.429704	7.06099	-8.52978	1.56765e-06	0.000174051	5.62543
CPSF2	2.35344	9.27595	8.51132	1.60438e-06	0.000175522	5.60245
CCP110	-1.07586	7.01768	-8.50897	1.60913e-06	0.000175522	5.59952
ZNF451	-0.964657	6.94447	-8.49933	1.62873e-06	0.000175571	5.5875
POGK	-0.558351	6.86079	-8.49491	1.63782e-06	0.000175571	5.58198
FBXO15	-1.494	7.39284	-8.48512	1.6581e-06	0.000176226	5.56977
DENR	-0.718311	6.84907	-8.43138	1.77442e-06	0.00018699	5.50247
CEP19	1.96668	11.5563	8.40929	1.82471e-06	0.000189159	5.47471
SNX3	-3.16738	8.41628	-8.40899	1.82542e-06	0.000189159	5.47432
FAM188A	-0.806565	6.94354	-8.38989	1.87016e-06	0.000189351	5.45027
PTPDC1	-0.55776	6.93583	-8.38208	1.88878e-06	0.000189351	5.44042
MORC3	-0.852187	6.90642	-8.38083	1.89179e-06	0.000189351	5.43884
PITPNB	-2.71146	8.48888	-8.37951	1.89496e-06	0.000189351	5.43718
DYNC1H1	-3.61	10.4316	-8.37261	1.91166e-06	0.000189351	5.42846
OVOL2	2.57753	12.4036	8.36974	1.91864e-06	0.000189351	5.42484
BLOC1S2	-2.49509	7.90669	-8.27492	2.16548e-06	0.000210613	5.30451
FAM172A	2.98132	9.30612	8.27403	2.16795e-06	0.000210613	5.30338
LRRC59	-0.426024	6.74667	-8.25929	2.20932e-06	0.000212212	5.28457
WDR20	-0.855842	6.97608	-8.25605	2.21854e-06	0.000212212	5.28043
MFSD7	1.00736	7.94796	8.24094	2.262e-06	0.000214718	5.26112
MRPL57	1.62384	12.5922	8.19509	2.3996e-06	0.000226053	5.20234
LEMD3	-0.782751	6.82266	-8.18567	2.42896e-06	0.000227099	5.19023
MZT2B	1.91648	8.2313	8.1791	2.44969e-06	0.000227327	5.18177
HNRNPA0	2.5481	8.74088	8.12411	2.63055e-06	0.000240612	5.11082
ACLY	-1.00805	7.17359	-8.12382	2.63154e-06	0.000240612	5.11044
2020-09-02	-2.7808	9.06932	-8.1079	2.68655e-06	0.000242171	5.08983
PCNX4	-0.602277	6.9773	-8.10139	2.70938e-06	0.000242171	5.08139
PDK4	-3.6353	8.34299	-8.09441	2.73411e-06	0.000242171	5.07234
CAB39	-2.98584	8.55449	-8.08892	2.75373e-06	0.000242171	5.06521
AHI1	-1.78586	7.41808	-8.08702	2.76055e-06	0.000242171	5.06274
IFT57	-0.811959	7.20851	-8.08567	2.76544e-06	0.000242171	5.06098
NR1D2	-1.0504	7.21068	-8.07815	2.79267e-06	0.000242845	5.05121
SLF2	-1.30524	7.3709	-8.06289	2.84882e-06	0.000246007	5.03137
DCAF11	2.4043	9.60194	8.03323	2.96144e-06	0.000253969	4.9927
ZC3H8	-1.66827	7.82889	-8.00499	3.07308e-06	0.000260844	4.95579
PSMA5	-1.18324	7.1765	-8.0024	3.08356e-06	0.000260844	4.9524
PNPLA8	2.85468	12.0944	7.98624	3.1497e-06	0.000264639	4.93122
ZMYM2	-1.67034	8.01657	-7.96899	3.22197e-06	0.000268894	4.90858
B4GALT2	2.73269	9.63299	7.94564	3.32265e-06	0.000272628	4.87787
RFWD2	-1.13531	7.19444	-7.94277	3.33528e-06	0.000272628	4.87408
FBXO11	-1.55424	7.67117	-7.94125	3.34198e-06	0.000272628	4.87208
FSIP2	3.32951	9.33012	7.93843	3.35441e-06	0.000272628	4.86837
DERL2	-1.70447	7.56929	-7.92628	3.40868e-06	0.000273872	4.85235
MDH1	-0.707079	6.88656	-7.92271	3.42481e-06	0.000273872	4.84763
FAM167A	-0.464649	6.86417	-7.91665	3.45237e-06	0.000273872	4.83963
HNRNPR	-0.719989	7.06107	-7.91545	3.45781e-06	0.000273872	4.83806
FKBP5	-0.871923	7.04634	-7.90222	3.51891e-06	0.000276947	4.82057
MRPS22	-1.75395	7.32883	-7.89328	3.56083e-06	0.000278484	4.80874
FAM217B	2.44266	12.7231	7.88066	3.6209e-06	0.000280831	4.79203
TRIM4	-1.12465	7.23253	-7.87454	3.65044e-06	0.000280831	4.78391
NDUFA6	-0.615288	7.0325	-7.8645	3.69944e-06	0.000280831	4.77059
SAAL1	-1.01398	7.15287	-7.86405	3.70162e-06	0.000280831	4.77
MRTO4	1.87489	12.0424	7.86285	3.70753e-06	0.000280831	4.76841
UBE3A	-2.30838	8.31323	-7.85904	3.72634e-06	0.000280831	4.76335
CEP70	-0.829821	6.93377	-7.82472	3.90053e-06	0.000292187	4.7177
ZNF549	2.2138	11.49	7.8153	3.94983e-06	0.000293563	4.70514
RAD51C	-0.593088	7.00624	-7.80853	3.98569e-06	0.000293563	4.69611
KCNH6	2.24749	12.0354	7.80777	3.98972e-06	0.000293563	4.6951
XKR3	-1.27669	7.14915	-7.77115	4.18998e-06	0.000306484	4.64613
DDX47	-1.23223	7.29211	-7.76201	4.24164e-06	0.000306584	4.63388
PTBP2	-0.575958	6.69496	-7.76084	4.24828e-06	0.000306584	4.63232
ETV2	2.69362	10.1158	7.75786	4.26531e-06	0.000306584	4.62831
RGS1	-0.71044	6.80119	-7.75169	4.30076e-06	0.000307337	4.62003
MORC4	-0.91758	7.07186	-7.74502	4.33944e-06	0.000307337	4.61108
MIS12	-1.71209	7.48727	-7.74322	4.34993e-06	0.000307337	4.60866
SUV39H2	1.4662	12.9014	7.72723	4.4444e-06	0.000311234	4.58717
RUNDC1	-0.426714	6.94322	-7.72543	4.45514e-06	0.000311234	4.58476
FUCA1	-1.78199	7.53301	-7.70833	4.55889e-06	0.000315965	4.56172
USP8	-0.693901	6.88256	-7.70592	4.57368e-06	0.000315965	4.55848
VPS26A	-2.58582	7.72105	-7.6974	4.62653e-06	0.000317072	4.54699
TOR1AIP1	-1.6611	7.34817	-7.68918	4.67809e-06	0.000317072	4.53589
SMC4	-0.901619	6.78569	-7.68885	4.68017e-06	0.000317072	4.53545
CLDND1	-2.65003	8.84964	-7.68703	4.6917e-06	0.000317072	4.53299
SETD3	-1.66256	7.41846	-7.67886	4.74376e-06	0.000318857	4.52194
NUMBL	2.21351	8.62967	7.67215	4.78695e-06	0.000320031	4.51287
GRXCR1	-0.656492	6.7436	-7.65423	4.90433e-06	0.000326125	4.48862
SLC38A6	-0.526109	7.00838	-7.63615	5.02592e-06	0.00033224	4.4641
TUBGCP4	2.75872	12.0684	7.63202	5.05416e-06	0.00033224	4.45849
SIAH1	-1.76252	7.40475	-7.62456	5.10554e-06	0.00033224	4.44836
TSG101	-1.19418	7.50429	-7.62098	5.13041e-06	0.00033224	4.44349
PSMC2	-2.38167	8.12033	-7.61655	5.16135e-06	0.00033224	4.43747
PSMA7	-2.04095	7.94233	-7.61499	5.17231e-06	0.00033224	4.43535
PAM	-1.07994	7.27282	-7.61343	5.18332e-06	0.00033224	4.43322
RTP5	3.25355	10.114	7.60822	5.22008e-06	0.00033288	4.42614
MAPK6	-0.636093	6.85253	-7.58632	5.37799e-06	0.000341201	4.39629
AKTIP	-1.27002	7.40062	-7.56754	5.51733e-06	0.000345238	4.37066
EIF3K	-1.50649	7.74895	-7.56589	5.52981e-06	0.000345238	4.3684
RPL27	-2.68618	9.39643	-7.55888	5.58294e-06	0.000345238	4.35882
CYB5B	-1.23154	7.1459	-7.55397	5.62047e-06	0.000345238	4.3521
2020-09-12	-1.59927	7.70557	-7.55367	5.62282e-06	0.000345238	4.35169
ALG5	-1.24837	7.35609	-7.55197	5.63588e-06	0.000345238	4.34936
C2orf47	-0.538543	6.88291	-7.55043	5.64772e-06	0.000345238	4.34726
DDX19B	-1.62376	7.54792	-7.54836	5.66374e-06	0.000345238	4.34442
EMC4	-0.883165	7.33932	-7.53634	5.75758e-06	0.000348475	4.32795
ACTRT3	-0.501975	6.71051	-7.53439	5.77289e-06	0.000348475	4.32529
HINT1	-3.45993	9.9496	-7.52654	5.83527e-06	0.000348889	4.31452
RHOU	-1.5708	7.42178	-7.52647	5.83586e-06	0.000348889	4.31442
PSMD7	-0.707324	6.99028	-7.51583	5.92149e-06	0.000352005	4.29981
MRPL22	-1.34894	7.40653	-7.51299	5.94459e-06	0.000352005	4.29591
BIRC2	-1.02549	6.88766	-7.46515	6.34828e-06	0.000373258	4.23004
AFTPH	-1.28551	7.08585	-7.46341	6.36355e-06	0.000373258	4.22763
LRFN4	2.20296	9.21983	7.43911	6.58018e-06	0.000384153	4.19405
PARK7	-3.06667	9.03441	-7.42949	6.66819e-06	0.000387472	4.18072
GRPEL1	-0.439505	6.86671	-7.42395	6.71936e-06	0.000388629	4.17305
MRPS23	-0.760932	7.02074	-7.41892	6.7662e-06	0.000389526	4.16608
QRICH1	-1.86017	8.10115	-7.41383	6.81403e-06	0.000390472	4.15902
CEP350	-1.89038	7.84295	-7.40638	6.88464e-06	0.000392708	4.14867
THSD1	-0.685341	6.97333	-7.39654	6.97898e-06	0.000394176	4.13502
ANKRD44	2.5527	11.891	7.39397	7.00392e-06	0.000394176	4.13144
AGBL2	-1.51557	7.26412	-7.3921	7.02204e-06	0.000394176	4.12884
STAM	-0.607495	6.83288	-7.39055	7.03715e-06	0.000394176	4.12669
GGNBP2	-2.02811	8.02658	-7.35695	7.37303e-06	0.000411138	4.07989
C3orf38	-1.78028	7.64969	-7.35229	7.42094e-06	0.000411961	4.07339
EED	-1.13644	7.16947	-7.33957	7.55343e-06	0.000415648	4.05562
STX2	-1.57332	7.56249	-7.3395	7.55419e-06	0.000415648	4.05552
NDUFA4	-1.98357	8.03382	-7.33306	7.62224e-06	0.000415699	4.04652
NSA2	-2.51965	7.77134	-7.33116	7.64243e-06	0.000415699	4.04386
RPL5	-2.3545	7.94126	-7.32994	7.65542e-06	0.000415699	4.04216
TBK1	-3.0255	9.13721	-7.30221	7.95727e-06	0.000430211	4.00333
MRPS15	-2.00009	8.73489	-7.2968	8.01766e-06	0.000430561	3.99573
ZFYVE21	-0.682924	6.92492	-7.29543	8.03298e-06	0.000430561	3.99381
PSMB5	-1.74362	7.73364	-7.28767	8.12057e-06	0.000432599	3.98292
CCNYL1	-0.813395	7.29144	-7.28297	8.17418e-06	0.000432599	3.97631
PPP1R2	-0.848304	6.87476	-7.28287	8.17538e-06	0.000432599	3.97617
NDUFS6	-2.27126	12.1225	-7.27363	8.28177e-06	0.000435184	3.96318
CCT4	-3.24249	8.54367	-7.26995	8.32447e-06	0.000435184	3.95801
TM2D3	-1.97378	7.55886	-7.26955	8.32922e-06	0.000435184	3.95744
CANX	-2.15878	8.02871	-7.26317	8.40395e-06	0.000437252	3.94847
YBX3	-1.66027	7.60909	-7.25552	8.49452e-06	0.000440122	3.9377
ZNF615	-0.556994	7.07197	-7.24434	8.6289e-06	0.00044523	3.92193
BTBD3	-1.04912	7.29941	-7.22396	8.8795e-06	0.000456267	3.89316
CAMK2D	-0.35271	6.8175	-7.20433	9.12833e-06	0.000467122	3.86539
ISCA1	-0.84306	7.02676	-7.19787	9.21183e-06	0.000468819	3.85623
RPUSD4	-0.569046	6.93693	-7.19351	9.26859e-06	0.000468819	3.85006
ZBED5	-0.754418	7.01875	-7.19305	9.2746e-06	0.000468819	3.84941
EEF1A1	-3.45394	10.1499	-7.18741	9.34867e-06	0.000469544	3.84141
SEC11C	-0.662265	7.05914	-7.18558	9.37291e-06	0.000469544	3.83881
EEF2K	-1.08582	7.57833	-7.18337	9.40221e-06	0.000469544	3.83567
CIDEA	2.46551	8.72011	7.18017	9.4447e-06	0.000469779	3.83114
TAPT1	-0.430471	6.69496	-7.16866	9.59952e-06	0.000475033	3.81479
GSK3B	-1.20523	7.42998	-7.16617	9.63339e-06	0.000475033	3.81125
ATP5O	-2.6369	9.41775	-7.16386	9.66493e-06	0.000475033	3.80796
PSMB2	-1.205	7.35238	-7.15881	9.73422e-06	0.000476555	3.80078
TMEM126B	-0.566547	6.86186	-7.13598	1.0054e-05	0.000490282	3.76828
VDAC3	-2.19782	10.9035	-7.128	1.01684e-05	0.000493674	3.7569
SLC38A9	-1.5752	7.34723	-7.12561	1.0203e-05	0.000493674	3.75349
TMEM50B	-0.92371	6.97986	-7.10292	1.05371e-05	0.000507863	3.72108
SACM1L	-0.641594	6.80174	-7.09613	1.06393e-05	0.000510352	3.71136
BTF3	-1.48845	8.49805	-7.09406	1.06708e-05	0.000510352	3.70839
MSRA	-0.466174	7.03592	-7.09106	1.07164e-05	0.00051057	3.7041
AP3M1	-1.77077	7.73324	-7.08092	1.08722e-05	0.000515065	3.68959
SLC20A1	-0.828871	7.03947	-7.07954	1.08936e-05	0.000515065	3.6876
SCD	-0.73447	7.15194	-7.06921	1.10552e-05	0.000520686	3.67279
JADE3	-1.15917	7.17681	-7.06191	1.11709e-05	0.000520686	3.66232
RUNDC3B	2.52675	8.67004	7.06125	1.11814e-05	0.000520686	3.66137
WDR19	-1.37388	7.51534	-7.06079	1.11889e-05	0.000520686	3.6607
COPS8	-1.30859	7.39165	-7.05872	1.12219e-05	0.000520686	3.65774
SRSF8	-0.525815	7.01009	-7.05427	1.12935e-05	0.000522062	3.65133
CRYGS	-0.464745	6.93533	-7.04752	1.14029e-05	0.000525168	3.64163
BET1L	-0.823592	7.30157	-7.04352	1.14683e-05	0.000525539	3.63588
INAFM1	1.31573	7.94148	7.04186	1.14955e-05	0.000525539	3.63349
XKR4	3.04207	8.93559	7.0284	1.17189e-05	0.00053379	3.61412
C9orf3	-0.468293	6.88598	-7.02256	1.18174e-05	0.000534701	3.6057
WDR77	-0.336888	6.7848	-7.01808	1.18933e-05	0.000534701	3.59925
MRPS35	-0.402257	6.83617	-7.01794	1.18958e-05	0.000534701	3.59904
CALM2	-2.87045	8.61449	-7.01705	1.19109e-05	0.000534701	3.59776
MYL12B	-1.58897	8.73752	-7.00996	1.20326e-05	0.000538221	3.58753
ATP6V1B1	1.3577	7.82242	6.98932	1.23944e-05	0.000552416	3.55771
AGBL4	3.41261	9.7388	6.9732	1.2685e-05	0.000563348	3.53438
TFB2M	-0.431553	6.75543	-6.9599	1.293e-05	0.000567181	3.51511
CCPG1	-0.565424	7.03749	-6.95989	1.29301e-05	0.000567181	3.5151
WTAP	-0.472404	6.78397	-6.95697	1.29847e-05	0.000567181	3.51087
MTHFD1L	-0.486949	6.8008	-6.95647	1.29941e-05	0.000567181	3.51014
C2CD5	-1.74794	7.44242	-6.95619	1.29993e-05	0.000567181	3.50973
VSIG1	2.19167	12.4618	6.95017	1.31125e-05	0.000570117	3.501
ZMPSTE24	-0.716772	6.93812	-6.94611	1.31895e-05	0.000571468	3.49511
COTL1	-1.66364	7.498	-6.93503	1.34021e-05	0.000576546	3.479
SLC17A8	0.311979	6.71941	6.93325	1.34365e-05	0.000576546	3.47642
AGPAT1	1.51168	8.62021	6.93277	1.34458e-05	0.000576546	3.47572
P3H3	0.901974	7.50531	6.92113	1.36739e-05	0.000581204	3.45878
RNF20	-0.788454	6.94738	-6.92018	1.36925e-05	0.000581204	3.45741
IKBKAP	-0.442097	6.73616	-6.92008	1.36946e-05	0.000581204	3.45725
NMNAT1	2.74776	10.7019	6.90952	1.39054e-05	0.000588141	3.44187
BLMH	-0.876593	7.3868	-6.90186	1.40603e-05	0.000592678	3.43071
TMEM19	2.63291	11.2636	6.89652	1.41694e-05	0.000595058	3.42292
MSRB3	2.17908	12.8388	6.89443	1.42125e-05	0.000595058	3.41986
USP47	-2.22328	9.62168	-6.88287	1.44525e-05	0.000603075	3.403
SYT13	-0.38839	6.98712	-6.87469	1.46252e-05	0.000608241	3.39103
GLIPR1L1	-3.41484	8.54437	-6.86633	1.48036e-05	0.000611697	3.37881
MRPL49	-0.52841	6.82516	-6.86619	1.48067e-05	0.000611697	3.3786
NIF3L1	-1.55818	7.56867	-6.85769	1.49906e-05	0.000617244	3.36616
ISLR2	4.33321	11.7628	6.8531	1.50909e-05	0.000619207	3.35944
CHRNA5	2.3039	11.8536	6.85097	1.51378e-05	0.000619207	3.35631
KDM3A	-1.622	8.80404	-6.84707	1.5224e-05	0.000620688	3.35059
ZNF492	2.30015	12.8341	6.84442	1.52827e-05	0.000621048	3.34671
SNX4	-0.752724	6.98902	-6.83316	1.55353e-05	0.000628126	3.33019
CLDN6	2.42852	8.80045	6.8319	1.55639e-05	0.000628126	3.32833
IFIH1	-1.15503	7.82956	-6.82952	1.5618e-05	0.000628126	3.32484
ZIC2	-0.644562	6.92062	-6.82687	1.56783e-05	0.000628126	3.32096
VPS29	-1.27167	7.38517	-6.82551	1.57095e-05	0.000628126	3.31895
NUBPL	2.65019	10.9392	6.81224	1.60164e-05	0.000637964	3.29945
ALG14	-1.93602	7.56451	-6.80997	1.60697e-05	0.000637964	3.2961
MPHOSPH8	-1.15138	7.28525	-6.80785	1.61195e-05	0.000637964	3.29298
DYNC1I2	-1.17546	7.52871	-6.80511	1.61841e-05	0.000637964	3.28895
KLF4	-1.40955	7.87533	-6.80393	1.6212e-05	0.000637964	3.28721
TBC1D15	-2.15684	7.82355	-6.79107	1.65197e-05	0.000647962	3.26826
CYP2J2	-1.41546	7.70124	-6.78789	1.65966e-05	0.000647962	3.26358
MRPL13	-0.391071	6.69728	-6.78562	1.66517e-05	0.000647962	3.26024
AP1G1	-1.14428	7.04756	-6.78469	1.66745e-05	0.000647962	3.25885
FAM109B	1.01669	7.68584	6.77257	1.69728e-05	0.000657497	3.24098
KIAA0196	-0.423404	6.95498	-6.76956	1.70479e-05	0.000658354	3.23653
AURKA	-2.11874	7.6589	-6.76066	1.72718e-05	0.000664938	3.22337
UTP14A	-0.327391	6.76601	-6.74327	1.77182e-05	0.000680019	3.19764
AP5M1	-0.776314	6.92624	-6.73955	1.78152e-05	0.000681637	3.19213
HARS	-0.578558	7.15807	-6.73564	1.79179e-05	0.000683463	3.18634
RPL41	-1.62788	14.252	-6.73156	1.80257e-05	0.000683784	3.18029
MFSD1	-0.816537	6.90364	-6.73116	1.80363e-05	0.000683784	3.1797
DCN	2.27814	8.07522	6.70657	1.87009e-05	0.000705473	3.1432
PUS7L	-0.278833	6.67981	-6.70581	1.87219e-05	0.000705473	3.14207
NRSN1	1.61116	7.73115	6.69744	1.89543e-05	0.000712074	3.12962
SCOC	-0.463309	6.90067	-6.69356	1.9063e-05	0.000713419	3.12386
SKIL	-0.784133	7.07022	-6.69208	1.91048e-05	0.000713419	3.12164
TTC25	-3.20611	8.56485	-6.6874	1.92372e-05	0.00071621	3.11468
NEK1	-0.713093	6.95128	-6.68165	1.9401e-05	0.000717812	3.10612
MDGA1	0.607387	7.30533	6.67995	1.94499e-05	0.000717812	3.10358
PSMB4	-0.748903	7.06507	-6.67983	1.94534e-05	0.000717812	3.1034
RNPEP	-0.385866	6.81606	-6.67468	1.9602e-05	0.000721155	3.09573
RAB18	-2.07574	9.13649	-6.66853	1.97809e-05	0.000725591	3.08656
RGPD4	2.10079	11.1558	6.64867	2.03707e-05	0.0007387	3.05692
PRIM2	-0.792967	7.13283	-6.6466	2.04334e-05	0.0007387	3.05381
CALCOCO2	-0.702181	6.87559	-6.64496	2.04831e-05	0.0007387	3.05136
PTCD3	-0.668997	6.99503	-6.64428	2.05036e-05	0.0007387	3.05036
LY96	-0.494967	6.99194	-6.64222	2.05663e-05	0.0007387	3.04727
MTHFD2	-0.592554	6.90542	-6.64181	2.05788e-05	0.0007387	3.04666
ZFP62	-1.56595	7.66449	-6.64124	2.05962e-05	0.0007387	3.04581
RNF32	-0.891408	7.2646	-6.63864	2.06759e-05	0.0007387	3.04191
NACA	-2.06708	7.52289	-6.63686	2.07305e-05	0.0007387	3.03925
MIB1	-1.41398	7.58245	-6.6368	2.07323e-05	0.0007387	3.03916
TMEM117	-0.521817	6.90105	-6.6279	2.10078e-05	0.000746376	3.02584
EXOC1	-1.137	6.88348	-6.6184	2.13063e-05	0.000754825	3.0116
CCDC63	-0.407964	6.75901	-6.61423	2.14385e-05	0.00075735	3.00536
ACTR3	-1.73823	8.30271	-6.60006	2.18949e-05	0.000771284	2.9841
COBL	-0.400975	6.82477	-6.59574	2.2036e-05	0.000772099	2.97761
PNN	-0.516606	6.71845	-6.59555	2.20422e-05	0.000772099	2.97733
SYDE2	1.86638	13.237	6.59306	2.21241e-05	0.000772791	2.97358
WDR61	-1.04586	7.09426	-6.58702	2.23242e-05	0.000774563	2.9645
ANLN	-0.585249	6.71209	-6.58567	2.23688e-05	0.000774563	2.96248
TMED5	-1.41571	7.19187	-6.58442	2.24107e-05	0.000774563	2.96059
RPS21	-1.75322	10.13	-6.58211	2.24878e-05	0.000774563	2.95713
CCDC138	-1.2882	7.42904	-6.58199	2.24919e-05	0.000774563	2.95694
HDAC4	-0.590317	6.97406	-6.5803	2.25486e-05	0.000774563	2.9544
UBE4A	-2.37939	8.03946	-6.5761	2.26902e-05	0.00077532	2.94808
YTHDF1	-1.46803	7.85784	-6.57595	2.26953e-05	0.00077532	2.94785
RYK	-0.65007	6.94845	-6.5739	2.27649e-05	0.000775565	2.94476
SNAPIN	-0.428846	6.87154	-6.56565	2.30466e-05	0.000781904	2.93235
RPL7A	-3.00084	8.59036	-6.56478	2.30767e-05	0.000781904	2.93103
MTERF1	-0.570856	6.78951	-6.55574	2.33901e-05	0.000790368	2.91741
PPIL4	-1.59152	7.31353	-6.5425	2.38577e-05	0.000803984	2.89743
CSNK1A1	-1.46617	7.69946	-6.53906	2.39805e-05	0.00080594	2.89224
DNAAF1	-0.426955	6.89058	-6.5364	2.40763e-05	0.000806978	2.88822
TBPL1	-2.45996	7.97067	-6.51543	2.48443e-05	0.000828338	2.85651
PFKM	-1.00544	7.25733	-6.51536	2.48468e-05	0.000828338	2.85641
NXPE2	2.5164	11.4822	6.51291	2.49382e-05	0.000829163	2.8527
TMEM17	1.90702	11.6511	6.49636	2.55652e-05	0.000847743	2.82762
EIF4G3	-2.34167	12.1259	-6.4943	2.56446e-05	0.000848115	2.82449
ZNF646	2.0326	8.54905	6.49131	2.57599e-05	0.000848725	2.81996
YRDC	-0.96972	7.26933	-6.48961	2.58257e-05	0.000848725	2.81739
RPL32	-1.88679	8.95047	-6.48853	2.58679e-05	0.000848725	2.81574
DBI	-3.76393	9.75715	-6.48557	2.59831e-05	0.000850262	2.81125
FRMD6	-0.748098	7.09599	-6.48193	2.61256e-05	0.00085123	2.80572
TRIM68	-0.508351	6.81623	-6.48061	2.61776e-05	0.00085123	2.80372
CD38	-0.671261	6.85847	-6.47958	2.6218e-05	0.00085123	2.80216
SNRPB	-0.308524	6.71601	-6.47722	2.63112e-05	0.000852029	2.79858
MRPL47	-2.0347	7.78678	-6.47295	2.64809e-05	0.0008553	2.79208
ENY2	-2.35422	8.69354	-6.4689	2.66427e-05	0.000857027	2.78593
MAP7D1	1.17569	8.27354	6.46817	2.66722e-05	0.000857027	2.78481
SPCS3	-0.51048	7.08973	-6.46592	2.67624e-05	0.000857217	2.7814
ANKS1A	-0.521719	6.82787	-6.46459	2.6816e-05	0.000857217	2.77938
APPL2	-0.415691	6.63776	-6.46211	2.69166e-05	0.000858226	2.7756
MAP2K4	-0.310845	6.74952	-6.45957	2.70198e-05	0.000859313	2.77173
RPS6	-3.63788	9.71641	-6.45088	2.73759e-05	0.000866538	2.75851
COX5A	-1.97802	7.96326	-6.44967	2.74259e-05	0.000866538	2.75666
CUL4A	-2.5971	8.34805	-6.44894	2.74561e-05	0.000866538	2.75555
TMEM267	2.53416	12.196	6.44053	2.78065e-05	0.000875378	2.74274
XBP1	-0.373263	6.94904	-6.43417	2.80749e-05	0.00088141	2.73304
ATP6V1D	-2.46168	8.18041	-6.43264	2.81399e-05	0.00088141	2.7307
MCEE	-0.555636	7.00858	-6.42442	2.84913e-05	0.000888518	2.71816
NOP10	-0.543227	6.88635	-6.42305	2.85506e-05	0.000888518	2.71606
ZNF33A	2.20701	12.7682	6.42234	2.85812e-05	0.000888518	2.71498
ANKLE1	2.40815	10.7216	6.41259	2.90059e-05	0.000899471	2.70008
WDR11	-0.699697	6.95018	-6.40671	2.92651e-05	0.000903228	2.69109
SUPT16H	-0.583869	7.04822	-6.40654	2.92723e-05	0.000903228	2.69084
RAD23A	-0.548111	6.87003	-6.40347	2.9409e-05	0.000905199	2.68613
PSMA1	-1.61796	7.28499	-6.39881	2.96171e-05	0.000907388	2.679
RPS4X	-4.17056	10.3579	-6.39606	2.97408e-05	0.000907388	2.6748
DDX21	-0.520974	6.8426	-6.39547	2.97675e-05	0.000907388	2.67389
TRIB3	-0.340261	6.90127	-6.39537	2.9772e-05	0.000907388	2.67374
TMEM175	-0.290978	6.68401	-6.39285	2.98857e-05	0.000908628	2.66988
IFT22	1.24968	7.79878	6.3889	3.00653e-05	0.000911859	2.66383
THOC7	-0.725322	6.95308	-6.37875	3.05318e-05	0.000923307	2.64827
PTGR1	-1.36529	7.22356	-6.37746	3.05913e-05	0.000923307	2.6463
RNF114	-1.59069	7.88549	-6.36977	3.09506e-05	0.000931891	2.6345
ZNF454	2.29704	10.9091	6.36228	3.1305e-05	0.000936227	2.623
LLPH	2.34351	10.7631	6.36191	3.13224e-05	0.000936227	2.62243
TAP1	-0.385193	6.76414	-6.36108	3.13621e-05	0.000936227	2.62116
CPD	-0.868317	6.86977	-6.36037	3.13958e-05	0.000936227	2.62007
FGGY	-0.768766	7.20467	-6.35416	3.16936e-05	0.000942587	2.61053
COPB1	-0.651281	7.05372	-6.35277	3.17607e-05	0.000942587	2.60839
HIBCH	-1.33822	7.69567	-6.34982	3.19038e-05	0.000944581	2.60385
COQ3	-0.820314	6.97922	-6.34366	3.22042e-05	0.000951211	2.59437
SHROOM3	-1.13739	7.09437	-6.34203	3.22843e-05	0.000951315	2.59187
DPY30	-0.837683	7.15309	-6.33447	3.26579e-05	0.000960049	2.58024
RSPH3	-1.63293	7.64296	-6.32417	3.31746e-05	0.000971446	2.56437
ESD	-0.60589	6.79707	-6.32244	3.32623e-05	0.000971446	2.5617
ATP5F1	-2.77894	11.2452	-6.32183	3.32935e-05	0.000971446	2.56075
TOP2B	-0.713834	6.78383	-6.32056	3.33581e-05	0.000971446	2.55879
TUBA3FP	1.60831	13.4006	6.31834	3.34709e-05	0.000972454	2.55538
PRDX1	-3.05667	8.90865	-6.31235	3.37783e-05	0.000979099	2.54614
DCUN1D1	-2.36059	11.9515	-6.3073	3.40398e-05	0.000984385	2.53834
IBA57	3.41723	10.3519	6.30114	3.43617e-05	0.000991387	2.52883
CEPT1	-1.43097	7.49216	-6.2983	3.45112e-05	0.000993396	2.52444
MTMR6	-0.845717	6.8832	-6.29385	3.47467e-05	0.000997864	2.51756
COPS6	-0.551398	6.90779	-6.28393	3.52782e-05	0.00101079	2.50222
MAGED1	-0.556459	7.08987	-6.28041	3.54686e-05	0.00101391	2.49678
GLTSCR1L	-0.531225	7.09123	-6.27208	3.59239e-05	0.00102457	2.48388
PIGF	-0.728857	6.90186	-6.2685	3.61215e-05	0.00102783	2.47833
MRPL3	-1.50391	7.47875	-6.26564	3.62803e-05	0.00102783	2.4739
RALBP1	-0.712915	6.88933	-6.26554	3.6286e-05	0.00102783	2.47374
LACC1	1.03696	7.21391	6.25824	3.66942e-05	0.00103703	2.46243
HELQ	-1.43165	7.24906	-6.24769	3.72933e-05	0.00105157	2.44605
TPTE	-2.14272	8.08172	-6.24522	3.74352e-05	0.00105318	2.44221
ZMYND12	-1.26045	7.1228	-6.24254	3.75897e-05	0.00105514	2.43805
NPC2	-2.69758	8.89958	-6.23555	3.79954e-05	0.00106093	2.42719
GNL3L	2.05168	11.5193	6.23511	3.80209e-05	0.00106093	2.42651
NBPF3	-0.588774	6.73017	-6.23421	3.80738e-05	0.00106093	2.42511
SFT2D1	-1.4538	7.86299	-6.23313	3.81371e-05	0.00106093	2.42343
CCDC65	-1.87101	7.37354	-6.23064	3.82832e-05	0.00106095	2.41956
PCNA	2.38653	9.33875	6.23017	3.83109e-05	0.00106095	2.41883
LNX2	-0.308504	6.6104	-6.22877	3.83938e-05	0.00106095	2.41665
MED7	-1.6563	7.67851	-6.22661	3.85211e-05	0.00106211	2.4133
RPS14	-2.48963	11.2033	-6.21996	3.89175e-05	0.00107053	2.40294
CCDC14	-1.51954	7.36333	-6.21733	3.90752e-05	0.00107053	2.39885
C6orf62	-1.97964	8.19196	-6.21685	3.91043e-05	0.00107053	2.3981
RBM15	-1.86293	8.27359	-6.2145	3.92462e-05	0.00107053	2.39444
FEM1C	-2.18838	9.12985	-6.21432	3.92572e-05	0.00107053	2.39416
TMEM203	-0.42172	6.91326	-6.21063	3.94805e-05	0.00107427	2.38842
MRPS7	-0.541866	7.0473	-6.20113	4.00628e-05	0.00108741	2.37361
RPS27L	-2.05474	8.56999	-6.19985	4.01419e-05	0.00108741	2.37162
ERLEC1	-0.993625	6.89679	-6.1985	4.02259e-05	0.00108741	2.3695
TFDP1	-1.38512	7.42644	-6.19193	4.06353e-05	0.0010928	2.35926
PLIN2	-0.631431	7.03799	-6.19152	4.0661e-05	0.0010928	2.35862
SHCBP1	1.32313	14.1568	6.19077	4.07084e-05	0.0010928	2.35745
ASTE1	-0.963844	7.20525	-6.18968	4.07769e-05	0.0010928	2.35574
COPS5	-3.3438	9.13894	-6.18508	4.10672e-05	0.00109822	2.34857
SOD2	-3.07435	9.58817	-6.18077	4.13415e-05	0.00110318	2.34184
PSMB7	-2.19812	10.4198	-6.17705	4.158e-05	0.00110717	2.33602
COX7C	-2.28117	8.8525	-6.17547	4.16814e-05	0.0011075	2.33355
RPA2	-1.38284	7.7415	-6.17238	4.18812e-05	0.00111043	2.32872
CCNB1	-1.85208	7.75841	-6.16148	4.25929e-05	0.0011269	2.31167
KIAA1429	-0.340765	6.90573	-6.15847	4.27921e-05	0.001127	2.30695
MED4	-1.74572	7.3953	-6.15683	4.29005e-05	0.001127	2.30439
SLC4A7	-0.669583	6.88399	-6.15651	4.29223e-05	0.001127	2.30388
RAB22A	-0.609027	6.78703	-6.15479	4.30363e-05	0.001127	2.3012
STRAP	-1.81278	7.63131	-6.15459	4.305e-05	0.001127	2.30088
FAM20B	-0.326302	6.96647	-6.14664	4.35834e-05	0.00113857	2.28842
EFHC2	-1.20951	7.16899	-6.14436	4.37373e-05	0.00114019	2.28485
DRG1	-1.83917	7.56844	-6.14042	4.40051e-05	0.00114478	2.27868
TPST1	-0.954509	7.21155	-6.13352	4.4479e-05	0.00115469	2.26784
AUTS2	-0.612434	6.75976	-6.13038	4.46958e-05	0.0011579	2.26292
PSMA8	-0.99278	7.03315	-6.12626	4.49829e-05	0.00116291	2.25645
NUP88	-1.92846	7.79258	-6.12211	4.52733e-05	0.00116799	2.24994
EIF1AY	-1.10506	7.12408	-6.11898	4.54941e-05	0.00117126	2.24501
UPF2	-2.33694	9.78315	-6.10972	4.61532e-05	0.00118577	2.23046
DNAJC27	-1.16748	7.11002	-6.10261	4.66664e-05	0.00119649	2.21927
SHTN1	-1.10476	7.21648	-6.09987	4.68652e-05	0.00119911	2.21497
AQP2	-1.50898	7.19801	-6.09435	4.72699e-05	0.00120698	2.20627
TSPYL2	0.795079	7.84475	6.09213	4.74337e-05	0.00120835	2.20277
VBP1	-0.577563	6.8261	-6.09023	4.75744e-05	0.00120835	2.19978
ZNF184	-1.02127	7.0278	-6.08486	4.79738e-05	0.00120835	2.19132
UXT	-1.41703	7.94202	-6.0844	4.80078e-05	0.00120835	2.1906
UBE2R2	-1.67072	11.1828	-6.08435	4.80114e-05	0.00120835	2.19052
KANSL1L	-0.413806	6.87636	-6.0843	4.80153e-05	0.00120835	2.19044
CIPC	-0.209435	6.57844	-6.0839	4.80455e-05	0.00120835	2.18981
PPM1B	-1.51525	7.42966	-6.08316	4.81007e-05	0.00120835	2.18864
TTF2	1.77155	11.8788	6.07838	4.84605e-05	0.00121493	2.1811
ANGPTL8	0.710831	7.48338	6.07567	4.86658e-05	0.00121762	2.17683
RNF4	-0.341565	6.83616	-6.07307	4.88634e-05	0.00121895	2.17273
ACBD3	-1.48936	7.3735	-6.0724	4.89147e-05	0.00121895	2.17166
ALDH1A2	-2.34999	8.21963	-6.07079	4.90376e-05	0.00121957	2.16912
ATP5A1	-2.15243	7.9878	-6.0652	4.94671e-05	0.00122779	2.1603
HECW2	0.7365	7.06384	6.06185	4.97265e-05	0.00123177	2.15501
HSPA8	-2.0124	7.71815	-6.06031	4.98457e-05	0.00123227	2.15259
R3HCC1L	-1.82439	8.57034	-6.04833	5.07875e-05	0.00125306	2.13364
NADK2	-1.48292	7.6736	-6.04442	5.10988e-05	0.00125824	2.12746
PNMAL1	-1.33658	7.52648	-6.0344	5.19061e-05	0.0012756	2.1116
TROVE2	-1.99359	9.10847	-6.03075	5.22035e-05	0.00128038	2.10582
SUCLA2	-0.792831	6.88675	-6.02821	5.24113e-05	0.00128145	2.1018
MORN5	-1.57498	7.83538	-6.02675	5.25313e-05	0.00128145	2.09948
WDR75	-0.372189	6.79193	-6.02645	5.25566e-05	0.00128145	2.09899
CCDC110	-2.96262	9.24881	-6.02096	5.30102e-05	0.00128998	2.0903
METTL4	-0.543309	6.81214	-6.01506	5.35023e-05	0.00129819	2.08094
DCBLD2	-0.491403	6.93405	-6.01442	5.35563e-05	0.00129819	2.07992
NDUFB6	2.36231	9.85977	6.01207	5.37543e-05	0.00130046	2.07619
RSU1	1.10145	14.5559	6.00956	5.39659e-05	0.00130304	2.07221
KDM5B	-2.39886	9.94594	-6.00325	5.45032e-05	0.00131346	2.06219
AGO4	-0.729985	7.25663	-6.00046	5.47422e-05	0.00131667	2.05776
ZMYM1	-0.609389	6.89089	-5.99423	5.52802e-05	0.00132445	2.04786
APOBEC3A	1.41498	14.4542	5.99397	5.53022e-05	0.00132445	2.04746
EAPP	-1.53805	7.43435	-5.99154	5.5514e-05	0.00132445	2.04359
OLR1	-0.571971	7.01177	-5.99048	5.56066e-05	0.00132445	2.0419
SURF4	-0.938043	7.43451	-5.99002	5.56469e-05	0.00132445	2.04117
POMP	-2.48613	8.96057	-5.98785	5.58367e-05	0.00132445	2.03772
MOGAT1	3.10373	8.87799	5.98708	5.59042e-05	0.00132445	2.0365
DNAJA4	-0.767707	7.21012	-5.98693	5.59176e-05	0.00132445	2.03626
ORC5	-1.51156	8.05906	-5.97697	5.67998e-05	0.00134156	2.02041
NDUFC2	2.50521	10.4216	5.97499	5.6977e-05	0.00134156	2.01726
NUP37	-0.992003	7.14854	-5.97445	5.70257e-05	0.00134156	2.01639
NEUROG2	-0.32167	6.82532	-5.97394	5.70714e-05	0.00134156	2.01558
SUB1	-0.39891	6.8117	-5.96728	5.76725e-05	0.00135313	2.00498
ACP6	-0.348414	6.7515	-5.96125	5.82229e-05	0.00136347	1.99536
MLLT1	2.41183	9.86596	5.95884	5.84442e-05	0.00136608	1.99152
DEK	-0.949614	7.04033	-5.95754	5.85642e-05	0.00136631	1.98945
PRMT3	-0.390027	6.76527	-5.95354	5.89347e-05	0.00137056	1.98306
PI4K2A	-0.262812	6.93997	-5.95275	5.90082e-05	0.00137056	1.9818
TKTL2	-1.4538	7.27833	-5.95201	5.9077e-05	0.00137056	1.98062
FAF2	-0.631077	7.20801	-5.94999	5.9265e-05	0.00137237	1.97741
XIAP	1.93099	11.8196	5.94585	5.96535e-05	0.00137489	1.97079
FAM160B1	-1.73456	8.47473	-5.94585	5.9654e-05	0.00137489	1.97079
ANKRD49	-0.375653	6.70304	-5.9453	5.97057e-05	0.00137489	1.96991
VN1R2	2.27947	9.38243	5.93831	6.0367e-05	0.00138469	1.95876
TFPI	-0.94002	7.34775	-5.93754	6.04407e-05	0.00138469	1.95752
AUNIP	-0.434457	6.76839	-5.93728	6.04653e-05	0.00138469	1.95711
GLYATL1	2.56026	8.28642	5.93483	6.06997e-05	0.0013875	1.95319
NTAN1	-1.48898	8.73835	-5.9314	6.10297e-05	0.00139248	1.94771
FNBP4	-1.7116	7.87687	-5.9267	6.14843e-05	0.00139866	1.94019
MTFR1	-0.33021	6.69978	-5.92628	6.15252e-05	0.00139866	1.93952
TMEM57	-0.445991	6.7898	-5.9203	6.2109e-05	0.00140921	1.92996
CPVL	-0.307652	6.81471	-5.91921	6.2216e-05	0.00140921	1.92822
USH1G	2.46061	9.46242	5.91059	6.30709e-05	0.00142411	1.9144
H3F3A	0.505999	7.47401	5.90931	6.3198e-05	0.00142411	1.91236
TCEB1	-2.59977	9.64149	-5.90912	6.32175e-05	0.00142411	1.91205
LCE3A	0.690036	7.39034	5.90788	6.33413e-05	0.00142432	1.91007
GPR155	2.13047	10.9943	5.90489	6.3642e-05	0.0014285	1.90527
TMEM9B	-2.30563	7.82811	-5.89941	6.41964e-05	0.00143835	1.89649
KIAA1191	-0.616081	6.92265	-5.89766	6.43742e-05	0.00143974	1.89369
POLR2F	-1.94452	8.29704	-5.88655	6.55183e-05	0.00146269	1.87586
USP1	-1.24103	7.13967	-5.88134	6.60621e-05	0.00147063	1.86749
ZNF671	-0.523527	6.97347	-5.88088	6.61102e-05	0.00147063	1.86675
PRDM13	0.750742	7.41903	5.87058	6.7199e-05	0.00149066	1.85021
TCERG1	-0.749376	6.94336	-5.87004	6.7257e-05	0.00149066	1.84934
MLF1	-0.968834	7.36185	-5.86898	6.73704e-05	0.00149066	1.84763
DDX3X	-1.37266	7.44337	-5.85837	6.85151e-05	0.00151015	1.83058
SLC7A11	1.22095	13.8717	5.85823	6.85305e-05	0.00151015	1.83035
CENPN	-0.881206	7.52137	-5.85745	6.86155e-05	0.00151015	1.82909
CHCHD2	-1.85843	8.81446	-5.84618	6.98563e-05	0.00153392	1.81095
HEBP1	-0.49976	6.98157	-5.84541	6.99424e-05	0.00153392	1.8097
RPS18	-1.34093	7.83088	-5.84098	7.04378e-05	0.00154207	1.80255
SULT4A1	-0.500591	6.88531	-5.83953	7.06e-05	0.0015429	1.80022
CTNND1	-0.430941	6.81263	-5.83501	7.11098e-05	0.0015482	1.79294
SEMG2	-2.33625	7.52029	-5.83408	7.12155e-05	0.0015482	1.79143
TCEAL4	-2.41935	7.91853	-5.83288	7.1352e-05	0.0015482	1.7895
HSPA4L	-2.40613	11.238	-5.83206	7.14447e-05	0.0015482	1.78818
TRIM74	2.08576	11.2819	5.83181	7.1474e-05	0.0015482	1.78777
NOSTRIN	-1.38058	7.42329	-5.83079	7.15894e-05	0.0015482	1.78613
NBR1	-2.60981	8.49597	-5.82842	7.18602e-05	0.00155023	1.78231
CMSS1	-0.351102	6.80873	-5.82779	7.19326e-05	0.00155023	1.78129
ASTN2	1.94151	9.73832	5.82421	7.23441e-05	0.0015564	1.77551
UBR2	-1.21514	7.10706	-5.8204	7.27848e-05	0.00155717	1.76936
SUGP2	-2.37658	10.548	-5.81996	7.28369e-05	0.00155717	1.76864
BRSK2	1.47121	7.90253	5.81948	7.28923e-05	0.00155717	1.76787
PTPRF	-0.540882	7.02507	-5.81915	7.29303e-05	0.00155717	1.76734
LMF2	1.75779	8.6923	5.81843	7.30139e-05	0.00155717	1.76618
HOXD3	0.620879	7.42618	5.81743	7.31311e-05	0.00155717	1.76456
STX12	-0.749101	7.0615	-5.81404	7.3527e-05	0.00156064	1.75909
LYRM7	2.70111	9.57155	5.81389	7.35454e-05	0.00156064	1.75884
NUDT5	-0.60319	6.93951	-5.81141	7.38372e-05	0.00156168	1.75483
STK4	-1.0548	7.16299	-5.81081	7.39077e-05	0.00156168	1.75386
PCF11	-0.537233	6.86499	-5.80927	7.40889e-05	0.00156168	1.75138
TTC3	-2.02404	7.91485	-5.80921	7.40965e-05	0.00156168	1.75128
TRIM58	1.6778	12.052	5.8057	7.45132e-05	0.0015678	1.7456
PCM1	-3.14618	8.67934	-5.7974	7.55074e-05	0.00158604	1.73218
FASTKD1	-0.413603	6.8035	-5.7924	7.61132e-05	0.00159607	1.72409
RACK1	-0.586156	7.23638	-5.79066	7.63256e-05	0.00159636	1.72126
RGL4	-1.15537	7.11078	-5.79018	7.6384e-05	0.00159636	1.72049
KPNA4	-0.98716	7.19086	-5.78809	7.66401e-05	0.00159803	1.7171
PPIL6	-1.87328	7.38687	-5.78743	7.67209e-05	0.00159803	1.71603
LRPPRC	-0.575202	6.70117	-5.77408	7.83773e-05	0.00162768	1.6944
MAGEB10	2.16943	10.5079	5.77385	7.84063e-05	0.00162768	1.69403
LMAN2L	-0.741022	7.04862	-5.77263	7.85589e-05	0.00162813	1.69206
ZNF667	2.75135	10.3736	5.7699	7.89031e-05	0.00163142	1.68763
UGP2	-1.22935	7.32625	-5.7693	7.898e-05	0.00163142	1.68664
NSUN2	-1.50933	7.69966	-5.76667	7.93126e-05	0.00163558	1.68239
SPRED1	-0.693707	6.82349	-5.76231	7.98685e-05	0.00164325	1.67531
JAKMIP1	-0.274638	6.68452	-5.76169	7.99488e-05	0.00164325	1.6743
SRGAP3	-0.583019	6.93893	-5.75758	8.04764e-05	0.0016505	1.66763
INIP	1.14819	13.8968	5.75688	8.05673e-05	0.0016505	1.66649
TXNRD1	-1.40645	8.38566	-5.75264	8.11173e-05	0.00165904	1.6596
PYCR2	-0.507075	6.82394	-5.7446	8.21702e-05	0.00167761	1.64654
NBPF15	-1.8363	8.10468	-5.74366	8.22951e-05	0.00167761	1.645
SPATA7	-1.30303	8.44701	-5.74142	8.25908e-05	0.00168088	1.64137
IL13RA2	-2.41963	9.93289	-5.73877	8.29437e-05	0.0016853	1.63705
ATP5B	-2.55896	9.38887	-5.73653	8.32421e-05	0.00168689	1.63342
C7orf62	-1.60758	7.20729	-5.73615	8.32933e-05	0.00168689	1.63279
ZNF14	1.52225	11.8447	5.73427	8.35447e-05	0.00168785	1.62974
RPGRIP1	-1.37136	7.42497	-5.73377	8.3612e-05	0.00168785	1.62892
SCIN	2.27814	12.8025	5.73167	8.38956e-05	0.00168823	1.6255
ITCH	2.159	10.8877	5.73161	8.39026e-05	0.00168823	1.62541
METTL3	-1.07008	7.13248	-5.72986	8.41398e-05	0.00169027	1.62255
C2orf16	2.03476	9.84686	5.72614	8.46441e-05	0.00169766	1.6165
ZC3H7A	-0.306438	6.87706	-5.7233	8.50319e-05	0.00170192	1.61187
DYNLRB1	2.60969	9.44754	5.72258	8.51303e-05	0.00170192	1.6107
GPR1	1.34597	13.7453	5.72153	8.52744e-05	0.00170207	1.60899
ADAM32	-2.02385	7.52437	-5.71679	8.5927e-05	0.00171234	1.60126
LAYN	-0.496278	6.79281	-5.7102	8.68432e-05	0.00172783	1.59052
LBHD1	-1.3983	7.58368	-5.70633	8.73856e-05	0.00173461	1.58422
RBBP7	-0.508163	6.82207	-5.70579	8.74627e-05	0.00173461	1.58332
NCOA6	-0.649429	7.03185	-5.70428	8.76753e-05	0.00173605	1.58086
FAM135A	-0.561573	6.70841	-5.70062	8.81937e-05	0.00174354	1.57489
HIKESHI	-1.08284	7.23641	-5.6945	8.90684e-05	0.00175777	1.5649
REPS1	-0.302144	6.80098	-5.69361	8.91961e-05	0.00175777	1.56345
MTDH	-1.17506	7.20313	-5.69153	8.94953e-05	0.00176088	1.56005
WDR26	-0.400455	6.8001	-5.68958	8.97778e-05	0.00176215	1.55686
SEC31A	1.09866	8.57423	5.68875	8.98975e-05	0.00176215	1.55551
ALG8	-0.802551	7.10855	-5.68815	8.99853e-05	0.00176215	1.55452
TAF9B	-0.332783	6.76984	-5.68344	9.06715e-05	0.00177086	1.54683
PER2	-0.722965	6.82454	-5.68314	9.0715e-05	0.00177086	1.54634
2020-09-09	1.83449	8.83933	5.67299	9.22145e-05	0.00179732	1.52974
ASXL2	-0.497614	7.12017	-5.67078	9.2544e-05	0.00180076	1.52613
CYP1A2	0.403461	7.18433	5.66987	9.26809e-05	0.00180076	1.52463
ZNF17	-0.382324	6.85414	-5.6668	9.31417e-05	0.00180689	1.51961
KCP	2.34114	8.90525	5.66403	9.35589e-05	0.00181096	1.51508
DENND2A	1.75618	8.33911	5.66348	9.3643e-05	0.00181096	1.51417
SCAP	1.85383	9.89119	5.66048	9.40982e-05	0.00181694	1.50926
NDUFAF2	-0.7519	7.16158	-5.64955	9.57762e-05	0.00184648	1.49135
C16orf62	-0.213214	6.63042	-5.64832	9.59674e-05	0.0018473	1.48933
SARNP	-1.64328	9.95501	-5.64183	9.69821e-05	0.00186395	1.47868
C15orf57	-1.5489	7.59018	-5.63837	9.75272e-05	0.00187153	1.473
ZNF638	-0.347012	6.84659	-5.63702	9.77408e-05	0.00187221	1.47079
CEBPG	-1.01067	7.14453	-5.63624	9.78636e-05	0.00187221	1.46951
SLFN13	0.532944	15.135	5.6267	9.93901e-05	0.00189849	1.45384
CKLF	-0.35285	6.69273	-5.6251	9.96469e-05	0.00190048	1.45122
TRAPPC10	-0.382819	6.5622	-5.62384	9.98513e-05	0.00190146	1.44915
TAF4B	1.97821	8.19196	5.62228	0.000100105	0.00190338	1.44657
DEFB126	-0.839265	7.09841	-5.61937	0.000100578	0.00190829	1.4418
HORMAD2	-1.07575	7.09658	-5.61881	0.00010067	0.00190829	1.44087
MCM3	-1.52748	7.30093	-5.61407	0.000101447	0.00191855	1.43309
TMEM241	2.28683	8.4278	5.61305	0.000101616	0.00191855	1.4314
ELMOD3	2.3267	10.3252	5.61269	0.000101675	0.00191855	1.43082
C19orf18	-0.548232	6.99136	-5.61114	0.000101931	0.00192047	1.42827
CDKN3	-3.11138	9.76498	-5.60416	0.000103094	0.00193898	1.41678
RAB31	-1.0343	6.99738	-5.60338	0.000103225	0.00193898	1.41549
YWHAH	-1.26059	7.19389	-5.60149	0.000103542	0.001942	1.41238
SNX5	-0.911515	6.9249	-5.59735	0.000104242	0.00195024	1.40556
TSPAN8	-1.29941	7.36168	-5.59657	0.000104373	0.00195024	1.40429
SVIL	-0.38296	6.82676	-5.59611	0.000104452	0.00195024	1.40352
RIT1	-0.533172	6.88493	-5.5931	0.000104964	0.00195687	1.39856
PPFIA1	-1.88538	7.84024	-5.59046	0.000105417	0.00195878	1.39421
ACAD11	-1.56757	7.35929	-5.59039	0.000105427	0.00195878	1.3941
MRPL45	-1.17815	7.33019	-5.58974	0.000105539	0.00195878	1.39303
FEN1	-0.430668	6.91674	-5.58843	0.000105765	0.00196004	1.39087
STXBP4	2.38513	9.41572	5.58608	0.000106171	0.00196463	1.38699
ZNF606	-0.418035	6.68846	-5.58041	0.000107154	0.00197988	1.37765
CLPX	-2.11526	12.008	-5.57882	0.000107432	0.00198207	1.37503
TMEM102	0.292535	7.08107	5.57604	0.00010792	0.00198733	1.37043
ALG6	-0.400243	6.70705	-5.57538	0.000108037	0.00198733	1.36934
ARID4A	-0.360446	6.8416	-5.57177	0.000108673	0.00199071	1.36339
SSH2	-0.470164	6.80994	-5.57063	0.000108876	0.00199071	1.3615
BAIAP2L1	-1.18892	7.4854	-5.56949	0.000109079	0.00199071	1.35961
PRPS1L1	-2.05523	7.74076	-5.56921	0.000109127	0.00199071	1.35916
PSTPIP1	1.99101	8.91617	5.56903	0.000109161	0.00199071	1.35885
SMARCA4	-0.980908	7.64667	-5.5683	0.00010929	0.00199071	1.35765
CWF19L1	-0.955559	7.08139	-5.56793	0.000109355	0.00199071	1.35705
PRPS2	-0.849245	7.01371	-5.56712	0.000109501	0.00199071	1.3557
RPL21	-0.581363	7.05639	-5.56165	0.000110482	0.00200414	1.34667
TTC26	-1.2151	7.17825	-5.5612	0.000110562	0.00200414	1.34593
PATZ1	0.209082	6.67654	5.55806	0.000111131	0.00201152	1.34073
LENG8	0.950852	7.8721	5.5563	0.000111449	0.00201435	1.33784
CSGALNACT1	-0.546853	6.83965	-5.55431	0.000111813	0.00201799	1.33454
MGST3	-1.30771	7.46378	-5.55209	0.000112218	0.00202237	1.33087
PLK4	-1.99074	9.4545	-5.55038	0.000112532	0.0020249	1.32804
MRPL14	-0.734127	7.2309	-5.54955	0.000112684	0.0020249	1.32667
NWD1	0.88329	13.7016	5.54394	0.000113722	0.0020406	1.31738
TTC29	-2.5069	7.99586	-5.54071	0.000114323	0.00204842	1.31205
TMEM14C	-0.529066	6.85077	-5.53918	0.00011461	0.00204884	1.30951
TMEM190	2.07581	9.23094	5.53883	0.000114676	0.00204884	1.30892
HNRNPLL	-0.441421	6.76968	-5.53603	0.000115201	0.00205527	1.3043
FAR2	-0.442019	6.72948	-5.53475	0.000115443	0.00205663	1.30217
SEC23B	-1.426	7.4979	-5.53057	0.000116234	0.00206777	1.29525
ATG10	1.68742	13.314	5.52811	0.000116703	0.00207128	1.29117
YES1	-0.438027	6.87687	-5.52779	0.000116765	0.00207128	1.29064
ZCCHC14	-1.12772	7.39948	-5.52544	0.000117215	0.00207349	1.28674
ZC3H12A	1.47743	8.79416	5.52539	0.000117223	0.00207349	1.28667
ZNF616	-0.400633	6.92087	-5.52286	0.000117709	0.00207914	1.28248
CCDC77	-1.09576	7.22275	-5.52176	0.000117921	0.00207993	1.28065
FNBP1	-1.5504	7.5953	-5.52087	0.000118094	0.00208003	1.27917
TMEM43	-0.358559	6.79258	-5.51812	0.000118626	0.00208362	1.27462
ATP10D	-0.604494	6.96157	-5.51688	0.000118867	0.00208362	1.27256
CUL9	1.17539	8.17725	5.51574	0.000119089	0.00208362	1.27067
VTA1	-0.568065	7.0507	-5.51565	0.000119106	0.00208362	1.27052
ZNF430	2.06946	10.848	5.51391	0.000119446	0.00208362	1.26764
FBXL5	-2.11358	7.83472	-5.51372	0.000119485	0.00208362	1.26731
FDFT1	-1.42304	7.84088	-5.51321	0.000119584	0.00208362	1.26647
ERLIN1	-0.59534	7.05871	-5.51216	0.00011979	0.00208362	1.26473
C1orf52	-0.78025	7.0938	-5.51156	0.000119907	0.00208362	1.26373
CDC16	-1.24637	7.59459	-5.51123	0.000119974	0.00208362	1.26318
C1orf131	-0.352351	6.6918	-5.51034	0.000120148	0.00208374	1.2617
KXD1	0.737216	7.65589	5.50828	0.000120555	0.00208704	1.25828
HPSE	1.84038	8.44523	5.50767	0.000120674	0.00208704	1.25728
LYG1	-0.551315	6.72184	-5.50648	0.000120911	0.00208823	1.25529
IDI1	-2.58804	8.46749	-5.50304	0.000121593	0.00209469	1.24959
ERMP1	-1.35381	8.47664	-5.5029	0.000121622	0.00209469	1.24935
SIAH2	-1.12859	7.24577	-5.49852	0.000122497	0.00210685	1.24209
CDR2	-1.60315	7.30696	-5.49764	0.000122675	0.002107	1.24062
MBLAC1	1.84691	11.8102	5.49402	0.000123405	0.00211524	1.23461
FHDC1	-0.477983	6.89003	-5.49358	0.000123495	0.00211524	1.23387
RBM25	-1.58307	7.44973	-5.49011	0.000124199	0.00212437	1.22811
TUT1	2.45776	10.5663	5.4845	0.000125349	0.00214109	1.21878
CIAO1	-0.191606	6.7453	-5.48193	0.00012588	0.00214721	1.21449
ZDHHC16	-0.362813	6.85167	-5.48081	0.000126111	0.0021482	1.21264
MYPOP	-0.427384	6.77448	-5.4785	0.00012659	0.00215342	1.20879
PIGX	2.43372	10.0221	5.47702	0.000126899	0.00215572	1.20632
FASTKD5	-0.726688	6.95437	-5.47318	0.000127701	0.00216588	1.19994
TMSB15A	-0.34653	6.89295	-5.4725	0.000127845	0.00216588	1.1988
FAU	-1.98397	11.029	-5.47027	0.000128314	0.00217087	1.19509
N4BP2	2.20664	12.5971	5.46942	0.000128493	0.00217093	1.19368
DMC1	2.58787	11.1392	5.46857	0.000128673	0.00217103	1.19226
EDEM3	0.93502	7.72217	5.46587	0.000129245	0.00217773	1.18776
PDZD9	-0.935392	7.27473	-5.46384	0.000129678	0.00218206	1.18438
ZNF23	-0.388674	6.76687	-5.45899	0.000130717	0.00219441	1.1763
LTN1	-0.694253	7.24547	-5.458	0.00013093	0.00219441	1.17465
CRELD1	-0.567918	7.04473	-5.45795	0.000130941	0.00219441	1.17456
ZNF440	2.31362	9.63578	5.45352	0.000131899	0.00220749	1.16717
TTC30A	-0.677689	7.23379	-5.45147	0.000132344	0.00220925	1.16376
MYDGF	-0.408609	6.83658	-5.4514	0.00013236	0.00220925	1.16364
ZNF605	-0.270865	7.00691	-5.45023	0.000132615	0.00221055	1.16169
SEC22B	-0.553709	7.01892	-5.44858	0.000132975	0.00221358	1.15895
DAZAP2	-0.428845	6.76689	-5.44693	0.000133337	0.00221663	1.15619
CALM1	-1.15648	7.64366	-5.44601	0.00013354	0.00221705	1.15465
GTF2H1	-0.591211	6.66677	-5.44173	0.000134486	0.00222885	1.1475
PFDN5	-2.03416	10.2244	-5.44117	0.000134609	0.00222885	1.14657
RPL30	-0.432249	7.02613	-5.43866	0.000135167	0.0022351	1.14238
SRSF4	-0.92328	8.00421	-5.43461	0.000136074	0.00224649	1.13561
MAK	-0.400393	6.79679	-5.43397	0.000136217	0.00224649	1.13454
WFDC9	-1.67086	7.38344	-5.43105	0.000136873	0.00225433	1.12968
ASIC4	1.31793	7.76622	5.42392	0.000138493	0.00227373	1.11776
CDC42EP5	0.883215	7.66047	5.42311	0.000138678	0.00227373	1.1164
C17orf58	-1.38609	7.43108	-5.42277	0.000138756	0.00227373	1.11584
RIN2	-0.300597	6.82062	-5.42239	0.000138844	0.00227373	1.1152
MTA3	-1.95219	8.74064	-5.42186	0.000138966	0.00227373	1.11431
GNMT	-0.274375	6.84822	-5.41511	0.000140523	0.00229318	1.10301
COQ10B	-1.03459	7.062	-5.41361	0.000140871	0.00229318	1.10051
POM121	-2.20298	8.55327	-5.4136	0.000140873	0.00229318	1.1005
RPL4	-2.29713	7.70908	-5.41352	0.000140892	0.00229318	1.10036
CCT6A	-0.250498	6.7874	-5.41225	0.000141188	0.00229333	1.09823
DPCD	-2.0678	8.94388	-5.41147	0.000141371	0.00229333	1.09692
DUSP19	1.80845	11.7761	5.41111	0.000141454	0.00229333	1.09633
ZBTB4	-2.18133	8.96398	-5.40956	0.000141816	0.0022962	1.09374
FBXO38	2.08666	8.2782	5.40438	0.000143035	0.00231293	1.08507
SENP2	-1.53411	7.63291	-5.40348	0.00014325	0.00231339	1.08355
SMN1	-0.923313	6.9468	-5.4014	0.000143743	0.00231834	1.08007
CWC25	-0.548862	6.92632	-5.40008	0.000144056	0.00231964	1.07786
EFR3A	-1.37668	7.27843	-5.39949	0.000144196	0.00231964	1.07688
STON1	2.1398	10.0872	5.3966	0.000144888	0.00232776	1.07203
LHFPL2	-0.944684	7.22411	-5.39197	0.000146003	0.00234265	1.06426
MAPK8IP1	1.36325	8.13041	5.38931	0.000146647	0.00234741	1.0598
C6orf10	-1.50624	7.31662	-5.38918	0.000146678	0.00234741	1.05959
MFF	-1.54261	7.44403	-5.38536	0.000147608	0.00235927	1.05318
ZNF317	-0.341395	7.01305	-5.38389	0.000147968	0.00236197	1.05072
GABBR2	1.53427	8.22788	5.38308	0.000148168	0.00236214	1.04935
STK25	-0.478305	7.1985	-5.38062	0.000148771	0.00236843	1.04524
RPL9	-1.11409	7.35592	-5.37992	0.000148943	0.00236843	1.04406
PJA2	-2.86255	8.16354	-5.36952	0.000151533	0.00240653	1.0266
RPL19	-1.60298	8.49537	-5.36721	0.000152115	0.00240912	1.02272
NGLY1	-1.83743	10.4501	-5.36666	0.000152253	0.00240912	1.0218
TEP1	1.94307	11.4202	5.36657	0.000152278	0.00240912	1.02164
QTRT2	1.57349	8.7668	5.35942	0.000154093	0.0024326	1.00963
ALS2	-0.898113	7.45267	-5.35885	0.000154239	0.0024326	1.00867
DARS2	-0.421551	6.7533	-5.35713	0.000154681	0.0024326	1.00577
SERPINA5	-1.72062	10.3845	-5.35695	0.000154727	0.0024326	1.00547
HMGN1	-2.12481	8.58924	-5.3569	0.000154739	0.0024326	1.00539
NBPF1	-1.92083	8.13756	-5.35233	0.000155917	0.00244802	0.997708
CRBN	-1.88036	7.63035	-5.34983	0.000156566	0.0024551	0.993503
MYNN	-0.722303	7.00465	-5.34741	0.000157197	0.00246189	0.98943
BBS2	-1.42932	7.71282	-5.34484	0.00015787	0.00246933	0.9851
C12orf50	-1.7101	8.29307	-5.34404	0.000158078	0.00246948	0.983763
ANKRD37	-0.350597	6.78895	-5.34218	0.000158569	0.00247137	0.980627
CREB3L4	-0.31036	6.8084	-5.34207	0.000158597	0.00247137	0.980447
MTA1	-0.778498	7.18333	-5.33798	0.000159679	0.00247979	0.97356
PRKAA1	-1.77648	8.13535	-5.33788	0.000159707	0.00247979	0.973378
TERF2	-0.563702	6.99399	-5.33736	0.000159845	0.00247979	0.972505
MED12L	-0.252706	6.65331	-5.33702	0.000159935	0.00247979	0.971937
ATP6V1G1	-2.11383	7.86824	-5.33477	0.000160533	0.002484	0.968153
BCL11A	2.98293	9.26993	5.3345	0.000160606	0.002484	0.967695
PRELID1	-0.422953	6.8754	-5.33135	0.00016145	0.00249281	0.962384
ALDH9A1	-1.98076	8.39734	-5.33061	0.00016165	0.00249281	0.961131
ARL6IP1	-0.828333	7.30977	-5.33013	0.000161777	0.00249281	0.960333
EXOSC2	1.12351	14.0182	5.32449	0.000163304	0.00251322	0.950819
DDX55	-0.466275	6.77554	-5.32255	0.000163831	0.00251734	0.947557
GCSH	-0.369905	6.78749	-5.32202	0.000163977	0.00251734	0.946655
ZNF350	-1.26227	7.42808	-5.31949	0.000164668	0.00252483	0.942396
DENND6A	-0.432341	6.76263	-5.3175	0.000165213	0.00252832	0.939044
ASCL4	-0.342564	6.74764	-5.31718	0.000165302	0.00252832	0.938503
SEC16A	-0.960837	7.21426	-5.31634	0.000165535	0.00252878	0.937074
ALPP	2.79588	9.5712	5.31401	0.000166179	0.002531	0.933142
FAM170A	-1.5067	7.60898	-5.31363	0.000166283	0.002531	0.932506
HIGD2A	-0.25113	6.50193	-5.3136	0.000166291	0.002531	0.932457
RPLP0	-1.18161	7.23719	-5.31255	0.000166582	0.00253233	0.930689
COMMD8	-1.78436	7.31689	-5.30454	0.000168822	0.00256325	0.917157
WDR82	2.32867	10.3645	5.30224	0.00016947	0.00256995	0.913277
MRPL16	-0.772464	7.17592	-5.30088	0.000169854	0.00257264	0.910982
MPP6	-3.01813	8.40566	-5.29777	0.000170739	0.00258009	0.90572
SNRNP70	1.45503	8.44049	5.29756	0.000170797	0.00258009	0.905376
DNAJB4	-1.4939	9.68	-5.29549	0.000171389	0.00258009	0.90187
NFE2L2	-0.794476	6.96175	-5.29528	0.000171448	0.00258009	0.901521
HSPA14	-2.21561	7.66684	-5.29525	0.000171456	0.00258009	0.901474
CCNB2	-2.6972	9.33161	-5.29478	0.000171591	0.00258009	0.900676
ZSCAN26	-0.566068	7.09953	-5.29273	0.000172179	0.0025858	0.897213
KLC1	-0.435501	6.75445	-5.28562	0.000174236	0.00261354	0.885183
ADIPOR1	-1.17775	8.39566	-5.28205	0.000175275	0.00262596	0.879157
TEKT1	-1.37417	7.78852	-5.27484	0.0001774	0.00265079	0.866952
RPL29	-2.45009	9.25819	-5.27467	0.000177451	0.00265079	0.866664
AIMP2	-1.93491	8.14357	-5.27426	0.000177572	0.00265079	0.865969
2020-03-03	-1.09722	7.3348	-5.27239	0.00017813	0.00265593	0.862792
UBA5	-0.514336	6.61626	-5.27082	0.000178596	0.00265734	0.860148
DHRS3	-0.842999	7.23639	-5.27063	0.000178652	0.00265734	0.859829
FBXO3	-0.818906	7.94108	-5.2654	0.000180222	0.00267749	0.850967
FAM107B	-1.75289	7.47674	-5.26045	0.000181723	0.00268763	0.842567
ALDH18A1	-0.322879	6.79141	-5.25984	0.000181906	0.00268763	0.841543
DUSP13	-1.75815	8.12761	-5.25982	0.000181913	0.00268763	0.841505
ARV1	-0.884761	7.20279	-5.25891	0.000182189	0.00268763	0.839971
RPN2	-1.27864	7.68422	-5.25881	0.00018222	0.00268763	0.8398
SLC41A2	-0.341453	6.66853	-5.25857	0.000182292	0.00268763	0.839396
CT47A11	-1.08038	7.31859	-5.25772	0.000182552	0.00268763	0.837953
YTHDF3	-1.32891	7.55221	-5.25746	0.000182633	0.00268763	0.837503
CCDC38	-0.642033	6.97584	-5.25348	0.000183854	0.00270239	0.830756
EXOC6B	-0.921909	7.3326	-5.25	0.000184928	0.00271339	0.824856
GPR83	-0.443548	6.99669	-5.24964	0.000185039	0.00271339	0.824251
SAR1A	-0.496647	6.96699	-5.24642	0.000186041	0.00272488	0.818777
CCNH	-1.04412	6.99491	-5.24415	0.000186749	0.00273203	0.814929
E2F5	-1.09868	7.23492	-5.24334	0.000187002	0.00273252	0.813558
PDZD8	-2.40295	11.7964	-5.24205	0.000187408	0.00273464	0.811361
MUL1	-0.191009	6.67817	-5.24148	0.000187587	0.00273464	0.810396
SLC35B3	-1.23849	7.20548	-5.23647	0.000189168	0.00275445	0.801895
SPA17	-2.86084	9.22133	-5.2349	0.000189667	0.00275849	0.799227
EPC2	-0.461446	6.84755	-5.23117	0.000190858	0.00277256	0.792888
ZC3H18	1.86732	8.75066	5.22636	0.000192403	0.00279092	0.784719
SURF6	-0.396745	6.90141	-5.22584	0.00019257	0.00279092	0.78384
TRIM13	-1.93372	10.5497	-5.22163	0.000193935	0.00280743	0.776687
LMBR1	-1.01689	7.23084	-5.22005	0.000194451	0.00281163	0.773995
PSENEN	-1.11879	7.42565	-5.21637	0.000195656	0.0028227	0.767739
SIPA1L3	2.0907	9.09469	5.21633	0.000195671	0.0028227	0.767661
C4orf22	-1.36095	7.21741	-5.20927	0.000198005	0.00285306	0.755651
DDX23	-0.534558	6.77093	-5.20625	0.000199012	0.0028622	0.750514
BRIX1	-0.972892	7.26111	-5.20576	0.000199174	0.0028622	0.749687
MCTP1	-0.284601	6.62642	-5.2053	0.00019933	0.0028622	0.748898
GALM	-0.377222	6.77757	-5.20411	0.000199729	0.00286463	0.746871
SRSF10	-1.36039	7.41816	-5.20145	0.000200624	0.00287415	0.742341
TATDN1	-0.319066	6.81162	-5.20036	0.000200993	0.00287612	0.74048
TMPRSS12	-2.38129	7.75005	-5.19949	0.000201286	0.002877	0.739005
DCUN1D4	-1.77256	9.19105	-5.19776	0.000201874	0.00288209	0.736054
CMTM6	-0.50378	6.73674	-5.19509	0.000202783	0.00289175	0.7315
GMFB	-0.350274	6.73465	-5.1928	0.000203563	0.00289943	0.727614
PCGF3	0.506152	7.13345	5.19215	0.000203788	0.00289943	0.726496
AKR7A2	-0.890043	7.37979	-5.1904	0.000204388	0.00290349	0.723517
TOR1B	-0.349139	6.65128	-5.18996	0.00020454	0.00290349	0.722765
ADNP	-0.973709	7.25469	-5.18813	0.000205169	0.00290909	0.719654
OLIG3	2.23345	9.0361	5.18624	0.000205823	0.00291504	0.716433
TMEM9	-0.577702	7.38196	-5.18031	0.000207891	0.00294098	0.706306
ACTL7B	1.83209	10.1499	5.17869	0.000208458	0.00294565	0.703549
DDIT3	-0.515249	6.95222	-5.17679	0.000209126	0.00295173	0.700309
PAPOLA	-0.781221	7.06184	-5.17409	0.000210081	0.00296108	0.69569
PALLD	-1.87802	8.14744	-5.17357	0.000210264	0.00296108	0.694812
ALMS1	-0.329483	6.67719	-5.16975	0.000211621	0.00297682	0.688296
CHMP2A	-3.21207	10.7658	-5.16701	0.000212601	0.00298723	0.683615
RPS23	-0.751855	7.28342	-5.16615	0.000212911	0.0029882	0.682141
RHPN2	-0.69471	6.90208	-5.16467	0.000213444	0.00298998	0.679609
IFI44	-1.03845	7.11538	-5.16446	0.000213519	0.00298998	0.679255
LYL1	1.17438	9.78715	5.16378	0.000213763	0.00299003	0.678097
TSPAN10	1.69209	8.24642	5.16059	0.000214916	0.00300081	0.67265
NDFIP1	-0.23752	6.64659	-5.16032	0.000215016	0.00300081	0.672178
ARSK	0.966014	14.3564	5.15733	0.0002161	0.00301028	0.667083
ZNRF2	-0.951126	7.23402	-5.15712	0.000216178	0.00301028	0.666716
ANKRD27	-1.29454	7.26009	-5.15425	0.000217229	0.00302152	0.661808
PDIA6	-0.670258	6.86212	-5.14995	0.000218813	0.00304015	0.65445
IFT88	-1.57262	8.77745	-5.14917	0.000219099	0.00304073	0.653127
DNTTIP1	-0.335627	6.77229	-5.14833	0.000219412	0.00304073	0.65168
SCP2	-1.92694	8.55623	-5.14779	0.000219611	0.00304073	0.650764
NCK1	-0.636949	7.02887	-5.14719	0.000219833	0.00304073	0.649741
CDCA7L	-1.48641	7.63974	-5.14571	0.000220385	0.00304499	0.647199
C11orf63	-0.996741	7.067	-5.14262	0.000221538	0.00305752	0.641915
RPL35	-1.68336	12.2862	-5.14104	0.000222128	0.00306096	0.639222
COQ8A	-0.971226	7.20967	-5.14064	0.00022228	0.00306096	0.63853
NAA35	-0.449681	6.89237	-5.13951	0.000222702	0.00306339	0.636606
SLC5A8	2.21075	9.24032	5.13696	0.000223666	0.00307325	0.632232
TM9SF3	-1.39716	7.49189	-5.13002	0.000226306	0.00310118	0.620352
SPATA2L	0.607281	7.29317	5.12973	0.000226416	0.00310118	0.61986
NME5	-2.34354	9.3348	-5.12965	0.000226447	0.00310118	0.619718
2020-09-10	-0.925315	6.92296	-5.12307	0.000228983	0.00313245	0.608443
LRFN5	1.4275	7.71353	5.12145	0.000229612	0.0031376	0.605666
PRRT2	2.05861	8.50279	5.11901	0.000230561	0.00314711	0.601489
AKR1B1	-1.55901	7.46403	-5.11767	0.000231085	0.00314897	0.599186
IL18	2.31511	11.7208	5.11737	0.000231203	0.00314897	0.598672
GNA13	-1.11496	7.14982	-5.11555	0.000231915	0.00315522	0.595556
RERE	-1.77892	8.42414	-5.11389	0.000232569	0.00316065	0.592706
SPATA4	-2.08802	7.5333	-5.11032	0.000233979	0.00317344	0.586584
SPATA22	-2.40532	8.76106	-5.11022	0.000234021	0.00317344	0.586405
SERP1	-1.24042	7.22525	-5.10836	0.000234758	0.00317997	0.583221
TPRG1L	-0.617706	7.17393	-5.10604	0.000235681	0.003189	0.579247
NELFA	-0.622135	7.05091	-5.10356	0.000236674	0.00319895	0.574989
RNASEH2B	-1.66002	7.6238	-5.09929	0.000238392	0.00321474	0.567664
VPS41	2.47837	9.36311	5.09896	0.000238529	0.00321474	0.567085
DNAJC10	-0.842247	7.2352	-5.09874	0.000238617	0.00321474	0.566709
MEIOB	-0.969192	7.08967	-5.09712	0.000239274	0.0032201	0.563924
TACO1	-1.04787	7.67674	-5.09618	0.000239654	0.00322173	0.562317
RNF19A	-3.07232	9.59883	-5.08953	0.000242372	0.00325144	0.5509
NUDT9	-0.719709	7.02846	-5.0895	0.000242387	0.00325144	0.550836
STAT1	-0.732578	6.93821	-5.08491	0.000244279	0.00327329	0.542962
NT5C3B	-0.7658	7.31003	-5.08221	0.000245405	0.00328483	0.538307
C20orf24	-1.84763	9.29537	-5.0779	0.000247206	0.00330376	0.530902
TRIM37	-2.28286	8.05777	-5.07756	0.00024735	0.00330376	0.530313
CD83	-0.99248	7.37705	-5.0766	0.000247754	0.00330501	0.528662
TPX2	-0.720824	6.73561	-5.07607	0.000247976	0.00330501	0.527755
ERI2	-0.582292	7.2187	-5.07467	0.000248566	0.00330934	0.525346
NCOA4	-3.0831	9.138	-5.07278	0.000249365	0.00331642	0.522099
ACTL6A	-1.05838	7.22067	-5.06918	0.000250896	0.00333322	0.515899
MRGBP	-1.77903	7.98354	-5.06741	0.000251653	0.00333971	0.512848
ZNF444	2.14624	10.3341	5.06116	0.000254339	0.00337176	0.502099
MDP1	-0.618129	7.06048	-5.05942	0.000255095	0.00337817	0.499097
DDX31	-0.284239	6.83349	-5.05802	0.000255704	0.00338263	0.496682
DYNLRB2	-2.39619	8.49567	-5.05578	0.00025668	0.00339195	0.492822
ZBTB47	1.10603	7.65855	5.05493	0.000257052	0.00339325	0.491358
MTOR	-0.678563	6.96875	-5.05283	0.000257972	0.00340179	0.487738
ESPL1	-0.351035	6.95522	-5.0522	0.000258248	0.00340181	0.486658
BUD31	-0.951511	7.39756	-5.0504	0.000259038	0.00340861	0.483566
KLHL23	-1.29424	7.68689	-5.0497	0.000259348	0.00340909	0.482353
C12orf57	-1.45074	7.63594	-5.0489	0.000259703	0.00341015	0.480968
CYTH3	-0.447309	7.00779	-5.04776	0.000260208	0.00341318	0.479
P2RY11	0.572468	7.34648	5.04591	0.000261026	0.00342029	0.475826
FAM96A	-0.49983	6.93479	-5.04143	0.000263025	0.00344286	0.4681
AP3S2	-0.357386	6.80292	-5.03715	0.000264951	0.00346186	0.460712
ACVR1	-0.200438	6.76436	-5.03697	0.000265033	0.00346186	0.460399
RANGAP1	1.94634	9.25015	5.03261	0.000267009	0.003484	0.452881
PRDM2	-0.357083	6.89093	-5.02886	0.000268724	0.00349972	0.446398
ISG20	-0.765914	7.1863	-5.02874	0.000268776	0.00349972	0.446201
SMCO1	2.02368	8.17105	5.02494	0.000270526	0.00351881	0.439633
ZC3H14	-2.44491	10.5326	-5.02338	0.000271246	0.0035245	0.43694
SLC16A5	-0.386207	6.868	-5.0194	0.000273092	0.00354478	0.430073
ATIC	-0.374752	6.83394	-5.01792	0.000273785	0.00355007	0.427508
NEK7	0.606802	6.8826	5.0157	0.000274822	0.0035598	0.423683
CDK14	-0.334256	6.96569	-5.01483	0.000275234	0.00356143	0.422164
NUDT4	-0.863746	6.9981	-5.01332	0.00027594	0.00356686	0.41957
ANK3	-0.527405	6.98025	-5.00599	0.000279419	0.00360807	0.406888
DNAJB11	-1.5929	7.30583	-5.00232	0.000281175	0.00362342	0.400546
UBE3B	-0.541476	7.08518	-5.00174	0.000281454	0.00362342	0.399541
SNX14	-0.97289	7.08322	-5.00128	0.000281678	0.00362342	0.398736
FKBP1B	-0.354555	6.73656	-5.00108	0.000281773	0.00362342	0.398394
RAB3IP	-2.23883	13.3654	-5.00035	0.000282123	0.00362418	0.397137
CNEP1R1	-0.459464	6.9117	-4.99735	0.000283573	0.00363904	0.391947
TPSB2	0.388572	7.0532	4.99629	0.00028409	0.00364116	0.390104
SEC13	-0.879694	7.47057	-4.99581	0.000284324	0.00364116	0.389273
HNRNPH3	-0.333752	6.84844	-4.99059	0.000286873	0.00367002	0.380237
ADPGK	-0.427387	6.84621	-4.98703	0.000288624	0.00368864	0.374075
CSRNP2	-0.399489	7.071	-4.9848	0.000289727	0.0036933	0.370214
ILDR1	-0.42798	6.73587	-4.9846	0.000289827	0.0036933	0.369866
DHX40	-0.424427	6.85827	-4.98449	0.00028988	0.0036933	0.36968
TSC22D1	-0.776284	6.94455	-4.98277	0.000290733	0.00370037	0.366706
PHYHIPL	-0.551802	6.86637	-4.9787	0.000292768	0.00372246	0.359646
EMC1	-0.437837	6.71157	-4.97769	0.000293276	0.00372512	0.357889
DMAP1	-0.615168	7.21722	-4.97666	0.000293791	0.00372784	0.356116
CCT5	-0.951611	7.1347	-4.97604	0.000294103	0.00372801	0.35504
PON1	1.98544	7.81359	4.97088	0.000296717	0.00375731	0.346084
HNRNPCL1	1.78383	8.36032	4.96958	0.000297378	0.0037593	0.343831
PBOV1	2.16061	10.637	4.96899	0.000297677	0.0037593	0.342813
FAM46C	-2.06398	13.056	-4.96879	0.000297781	0.0037593	0.34246
C17orf74	1.52238	9.13188	4.96754	0.000298418	0.00376352	0.340297
RNASEH2A	-0.310049	6.9174	-4.96536	0.000299533	0.00377301	0.336523
CD209	-0.253201	6.72808	-4.96435	0.000300051	0.00377301	0.334773
MYL6	-1.1065	7.64318	-4.9643	0.000300081	0.00377301	0.334673
TRAK2	-0.535476	6.91821	-4.96216	0.000301181	0.003781	0.330969
HINT3	-0.532738	6.99412	-4.96188	0.000301324	0.003781	0.330487
RAB11A	-3.10619	10.0166	-4.96126	0.000301645	0.00378121	0.32941
IVNS1ABP	-0.780473	7.25358	-4.96026	0.000302166	0.00378122	0.327663
NDUFA2	-1.21195	7.13443	-4.96009	0.000302254	0.00378122	0.327368
LOC81691	-2.03727	7.71147	-4.95777	0.000303455	0.00379242	0.323357
CIAPIN1	-1.02942	7.16802	-4.95441	0.00030521	0.00381053	0.317517
NPEPPS	-0.316365	6.78621	-4.95343	0.000305727	0.00381315	0.315807
TMEM263	-1.62842	7.45714	-4.95027	0.000307385	0.00382744	0.310333
ARMC3	-1.75385	7.80553	-4.95008	0.000307488	0.00382744	0.309993
LETMD1	-1.47813	7.76068	-4.94809	0.00030854	0.0038367	0.306534
CCDC90B	-2.44598	8.93259	-4.94609	0.000309597	0.00384599	0.303074
SPHK2	1.86646	8.96057	4.94368	0.000310883	0.00385811	0.298879
PCP2	1.27398	9.10142	4.94288	0.000311309	0.00385955	0.297492
STAMBPL1	-0.800053	6.89141	-4.93959	0.000313076	0.00387759	0.291765
PRR15L	-0.52553	7.19804	-4.93776	0.000314059	0.00388294	0.288593
WDR86	0.240937	6.98215	4.93709	0.000314419	0.00388294	0.287433
NOP58	-1.15408	7.2146	-4.93705	0.000314444	0.00388294	0.28735
CRTAP	-0.255908	6.55556	-4.93492	0.000315594	0.00389327	0.283656
THOC3	-1.51669	8.22	-4.93226	0.000317039	0.00390722	0.279033
TCTN3	-0.468003	6.96641	-4.93066	0.000317915	0.00390872	0.276239
FOXA1	-1.1703	7.02695	-4.93055	0.000317974	0.00390872	0.276054
SAMD13	-2.21186	7.94882	-4.92993	0.000318314	0.00390872	0.274971
RFX3	0.753315	7.52473	4.92929	0.000318664	0.00390872	0.273859
COG4	-0.51034	6.86883	-4.92916	0.000318733	0.00390872	0.273641
OCRL	-0.936429	7.13235	-4.92795	0.0003194	0.00391304	0.271524
STK36	-2.71883	9.69158	-4.92351	0.000321845	0.00393574	0.263807
PTPRR	0.370038	6.62574	4.92295	0.000322153	0.00393574	0.262838
IK	-1.56771	7.3192	-4.92286	0.000322202	0.00393574	0.262684
EMC2	-1.0806	7.15274	-4.92081	0.000323343	0.00394464	0.259108
TMEM139	1.53524	8.52864	4.92041	0.000323565	0.00394464	0.258413
TRIM24	-1.81032	7.56259	-4.91934	0.000324164	0.00394807	0.256541
NOP16	-0.86462	7.30674	-4.91358	0.00032739	0.00398346	0.246518
DHRS12	-0.473162	6.89021	-4.91242	0.000328042	0.00398749	0.244506
USP38	-1.22403	7.28084	-4.90779	0.00033067	0.00401551	0.236432
ANAPC5	-0.714999	7.55796	-4.90425	0.000332691	0.00403611	0.230264
SOX9	-1.41	7.642	-4.9034	0.000333178	0.00403808	0.228784
EXO5	2.1404	10.4508	4.9007	0.000334729	0.00405292	0.224085
PPP6R2	-0.678672	7.20235	-4.8995	0.000335425	0.00405307	0.221983
FAM206A	-0.572257	6.98351	-4.89943	0.000335464	0.00405307	0.221865
EIF1	-1.42909	7.94047	-4.89883	0.000335812	0.00405307	0.220817
MALT1	-0.362317	6.92249	-4.89833	0.0003361	0.00405307	0.219949
MAP4K5	-0.291569	7.00007	-4.89732	0.000336685	0.00405307	0.218189
AP3B1	-1.17144	7.49547	-4.8973	0.000336697	0.00405307	0.218154
XPA	-0.642385	6.83714	-4.89622	0.000337325	0.00405567	0.216266
MAGEL2	1.15546	8.12241	4.89581	0.000337565	0.00405567	0.215547
IGF2BP2	1.94556	9.16921	4.8943	0.00033844	0.00406225	0.212929
RHOA	-1.14785	7.50821	-4.88823	0.000342001	0.00409794	0.202336
WSB2	-1.19398	7.30415	-4.88811	0.000342071	0.00409794	0.202128
HNRNPA1	1.61444	9.52778	4.88681	0.000342841	0.0041032	0.199855
SBDS	-1.24963	7.50039	-4.88594	0.000343356	0.00410541	0.198336
OR8B4	0.565366	7.08432	4.88498	0.000343921	0.00410822	0.196672
ZFP91	-1.99803	9.32701	-4.8818	0.000345818	0.00412692	0.191105
CD74	-0.621108	7.08322	-4.88063	0.000346514	0.00413126	0.18907
CAMLG	-1.84653	9.65124	-4.87801	0.000348086	0.00414603	0.18449
PEAK1	-1.02671	7.47924	-4.87662	0.000348917	0.00414937	0.182077
ANAPC16	-1.00316	8.29173	-4.87559	0.000349542	0.00414937	0.180269
EPSTI1	-1.66059	8.29793	-4.87544	0.000349631	0.00414937	0.18001
VAMP7	-0.765264	6.84556	-4.87532	0.000349702	0.00414937	0.179806
MAP1LC3A	2.07651	10.5307	4.87241	0.000351463	0.0041663	0.174721
UBE2E3	-0.438282	6.84969	-4.86768	0.000354345	0.00419646	0.166458
SDF2	-0.20072	6.90606	-4.8657	0.000355561	0.00420685	0.162992
PCDHB9	2.43436	9.07419	4.86117	0.000358352	0.00423554	0.155083
PBX3	-0.766139	7.19276	-4.86066	0.000358667	0.00423554	0.154194
RWDD4	-0.586153	7.04103	-4.85991	0.000359134	0.00423704	0.152876
METTL21C	-0.502243	6.94494	-4.85772	0.000360495	0.00424905	0.149051
ANKMY2	-0.958382	7.07165	-4.85646	0.000361281	0.00425428	0.146847
NPM1	1.99287	8.91768	4.85518	0.000362083	0.0042597	0.144601
PTPN22	-0.205419	6.64186	-4.8516	0.00036433	0.00428208	0.138343
NEIL1	1.72285	8.34144	4.84983	0.000365448	0.00428775	0.135244
LYSMD4	-0.34195	6.68001	-4.8494	0.00036572	0.00428775	0.134491
PIH1D3	0.682239	14.8685	4.8492	0.000365846	0.00428775	0.134141
SENP5	-1.03909	7.48603	-4.84834	0.000366393	0.00429011	0.132632
ASB12	2.09624	9.55568	4.84773	0.000366775	0.00429055	0.131576
TMED7	-0.704503	6.86044	-4.84654	0.000367533	0.00429362	0.129487
SPINT2	-2.04434	8.19939	-4.84615	0.000367781	0.00429362	0.128805
PRSS36	0.401325	7.17959	4.84569	0.000368074	0.00429362	0.128001
WASF3	-0.97638	7.32157	-4.84197	0.000370449	0.00431728	0.121492
SLC44A5	-0.439102	6.91734	-4.83808	0.000372954	0.0043357	0.114675
AKT3	-0.691318	7.0905	-4.83804	0.000372979	0.0043357	0.114606
SNRNP25	-0.356858	7.00415	-4.83789	0.000373076	0.0043357	0.114345
CORO1B	1.75345	8.33018	4.8332	0.000376115	0.00436694	0.106136
ARMC4	-2.52702	8.14945	-4.82906	0.000378821	0.00439425	0.0988852
PRKCH	-0.71784	6.96628	-4.82725	0.000380014	0.00440399	0.0957031
IMP4	-0.505834	7.07773	-4.82363	0.000382403	0.00442755	0.0893634
CAMK4	-1.57134	8.28942	-4.82041	0.000384542	0.00444155	0.0837216
TRIM69	-0.77369	7.09495	-4.82035	0.000384587	0.00444155	0.0836038
RPS13	-0.967383	7.02862	-4.81933	0.000385266	0.00444155	0.0818183
TEX9	-0.31165	6.7059	-4.8192	0.000385348	0.00444155	0.0816022
ZNF540	-0.364313	6.88839	-4.81913	0.000385398	0.00444155	0.0814712
CNNM2	1.90068	9.03623	4.81829	0.000385958	0.00444388	0.0800034
SGTA	1.66971	9.01014	4.81697	0.000386845	0.0044475	0.0776823
FAM60A	1.44886	8.91158	4.81676	0.000386988	0.0044475	0.0773082
DDA1	2.26404	10.2466	4.81489	0.000388242	0.0044578	0.0740341
CCDC7	-2.11921	9.81527	-4.81339	0.00038925	0.0044619	0.0714119
MIGA1	2.24213	10.1901	4.81329	0.000389317	0.0044619	0.071238
ZNF669	2.18742	8.90536	4.80896	0.000392254	0.0044877	0.0636361
AKAP8	-0.455792	7.11262	-4.80891	0.00039229	0.0044877	0.063542
ACAD9	-0.997066	7.35061	-4.80691	0.000393651	0.00449913	0.060039
GINM1	-2.14798	11.3897	-4.80582	0.000394395	0.0045035	0.0581286
PPP1R14A	-0.411921	6.95601	-4.80526	0.00039478	0.00450375	0.0571437
GABPB2	1.70448	13.539	4.80254	0.00039665	0.00452071	0.0523616
IARS2	-0.610865	7.03947	-4.80204	0.000396994	0.00452071	0.0514869
TTC32	-0.396643	6.83351	-4.80083	0.00039783	0.00452608	0.0493593
TDRD3	-0.458225	6.98868	-4.79976	0.00039857	0.00453036	0.0474783
PHC1	-1.2596	7.56117	-4.79758	0.000400082	0.0045434	0.0436478
C1orf185	-1.56712	7.51217	-4.79656	0.000400789	0.00454728	0.0418618
C12orf43	2.16684	9.78925	4.79097	0.000404697	0.00458743	0.0320484
SPPL2A	-1.56916	7.68396	-4.7898	0.000405525	0.00458852	0.0299816
TMEM101	-0.97786	7.31025	-4.78937	0.000405826	0.00458852	0.0292315
ELL2	-0.364152	6.85293	-4.78801	0.000406784	0.00458852	0.0268455
ZNF786	2.01185	10.6091	4.78779	0.000406943	0.00458852	0.0264499
RAB4A	-0.52208	7.12367	-4.78774	0.000406979	0.00458852	0.0263613
DHRS7B	-0.904065	7.31302	-4.7877	0.000407007	0.00458852	0.0262914
PNISR	-0.556028	6.81329	-4.78686	0.000407596	0.00459099	0.0248301
CPXM2	-0.364662	6.91572	-4.78559	0.000408498	0.00459698	0.0225944
YWHAQ	-1.88199	9.30983	-4.78377	0.000409793	0.00460739	0.0193929
FAM24A	-0.819059	7.02194	-4.78285	0.000410451	0.00460871	0.0177688
FBN1	-0.775334	7.02533	-4.78257	0.000410652	0.00460871	0.0172746
PAQR9	-1.78327	8.58498	-4.78133	0.000411538	0.0046145	0.0150937
PYURF	-1.29777	7.57758	-4.78019	0.000412355	0.00461949	0.0130896
MAFB	-0.446371	6.70929	-4.77941	0.000412913	0.00462051	0.0117218
FAM3B	-0.748016	6.90651	-4.77867	0.000413439	0.00462051	0.0104324
CSDE1	-2.1624	11.1683	-4.77842	0.000413622	0.00462051	0.0099851
RAB2B	-0.996541	7.07045	-4.77799	0.000413933	0.00462051	0.0092264
ZNF609	-0.298478	6.73558	-4.77509	0.000416026	0.00463972	0.00412379
ZNF768	1.66207	8.24829	4.77245	0.000417941	0.0046569	-0.00051956
COX11	-0.799556	7.10447	-4.77127	0.0004188	0.00466229	-0.00259612
BROX	-0.505009	6.84641	-4.76994	0.000419767	0.00466888	-0.00492974
MYH14	0.93224	7.9052	4.76853	0.000420801	0.00467446	-0.00741695
SMG1	1.38958	12.5651	4.76809	0.000421119	0.00467446	-0.00818076
CYB561D1	1.57025	8.20789	4.76772	0.000421397	0.00467446	-0.00884714
CAV1	0.855574	7.62272	4.76568	0.000422895	0.0046869	-0.0124371
BORA	-1.02293	7.11379	-4.76423	0.000423959	0.00469171	-0.0149785
IL7	-0.903315	7.42696	-4.76406	0.000424084	0.00469171	-0.0152755
FAM98B	0.568196	14.573	4.7626	0.000425166	0.0046995	-0.0178531
MTMR4	-1.38069	8.21496	-4.75883	0.000427962	0.0047262	-0.0244811
TMTC4	-0.372105	6.70398	-4.75442	0.000431268	0.00475849	-0.0322637
PSMC6	-1.08806	7.28279	-4.75214	0.000432981	0.00476954	-0.0362718
SETDB2	-1.56868	9.31008	-4.75186	0.000433194	0.00476954	-0.0367702
LRIT1	-0.939139	7.05981	-4.75156	0.00043342	0.00476954	-0.0372969
MARK3	-1.57813	7.56296	-4.75104	0.000433809	0.00476959	-0.0382029
DTX3L	0.676161	7.37858	4.74977	0.00043477	0.00477594	-0.0404413
WBP11	-1.39838	8.93304	-4.74827	0.000435915	0.00478429	-0.0431005
SLC25A33	-1.6367	9.86548	-4.74757	0.000436441	0.00478584	-0.0443206
CARM1	1.95879	9.80793	4.74703	0.000436857	0.00478618	-0.045283
SIRT1	-0.694564	6.98119	-4.74627	0.000437435	0.0047883	-0.0466206
ZFAND1	-0.687239	6.87408	-4.74273	0.000440145	0.00481372	-0.0528653
SPAG16	-1.75666	7.39465	-4.74032	0.000441997	0.00482973	-0.0571107
PLCL2	-0.42475	6.80638	-4.73795	0.000443824	0.00484303	-0.0612826
TRNT1	-0.478746	6.80207	-4.73773	0.000443993	0.00484303	-0.0616684
C1orf87	-0.996324	7.13869	-4.73221	0.000448291	0.00488294	-0.0714092
COQ10A	-0.249276	6.68178	-4.73202	0.000448438	0.00488294	-0.0717387
TCTN1	-0.817644	7.19125	-4.73116	0.000449112	0.00488601	-0.0732592
EIF2S2	-1.82493	9.48528	-4.72984	0.000450149	0.00489301	-0.0755903
MRPS21	1.85879	8.82127	4.7292	0.000450653	0.00489421	-0.0767222
ALOX5AP	-1.75532	7.67941	-4.72746	0.000452027	0.00490484	-0.0797989
NARF	-1.15828	8.09403	-4.72614	0.000453065	0.00491182	-0.0821183
CD1D	-0.228317	6.70023	-4.72515	0.000453848	0.00491603	-0.0838653
CBX1	-0.503591	6.85288	-4.72428	0.000454537	0.00491921	-0.0853991
FAM122B	-0.265729	6.70082	-4.72328	0.000455337	0.00492358	-0.0871771
RPS19	-1.42136	9.81064	-4.72237	0.000456057	0.00492708	-0.0887738
IPO11	-0.501928	6.91283	-4.72076	0.000457342	0.00493667	-0.0916176
PRKAB1	-0.509215	6.92676	-4.72002	0.00045793	0.00493763	-0.0929179
BCOR	-0.212082	6.76429	-4.71966	0.000458225	0.00493763	-0.0935682
PGR	-1.18677	7.30256	-4.71633	0.000460892	0.00496207	-0.0994363
TMEM164	-0.567895	6.97967	-4.71527	0.00046175	0.00496378	-0.101315
PPP3CB	-1.06017	7.67312	-4.71515	0.000461849	0.00496378	-0.101533
RER1	-0.632514	6.91241	-4.71244	0.000464039	0.00498301	-0.106316
SRGAP2	-0.198419	6.66208	-4.71028	0.000465796	0.00499757	-0.110137
RECQL	-0.619798	6.81431	-4.70744	0.000468115	0.0050145	-0.115157
PSMA3	-0.668686	7.04251	-4.70721	0.0004683	0.0050145	-0.115557
KCNMB1	0.90322	7.58894	4.70686	0.000468585	0.0050145	-0.11617
TAS2R14	0.42904	7.13969	4.70611	0.000469203	0.0050168	-0.117504
MATR3	-1.58761	7.36499	-4.70434	0.000470658	0.00502586	-0.120633
SRSF12	-1.89208	7.67015	-4.70409	0.000470858	0.00502586	-0.121064
MRPL15	-0.580027	7.18166	-4.70256	0.000472122	0.00503266	-0.123773
TCF7L1	-0.486774	6.94022	-4.70234	0.000472305	0.00503266	-0.124165
METAP2	-1.54819	7.34933	-4.69885	0.000475198	0.00505508	-0.130339
NAE1	-0.796043	7.53017	-4.69882	0.000475222	0.00505508	-0.13039
CEP128	-0.394688	6.64986	-4.69536	0.000478105	0.00508139	-0.136503
NUP35	-1.43301	8.33412	-4.69423	0.000479051	0.0050871	-0.138502
KRT38	1.47347	8.06715	4.69146	0.00048138	0.00510748	-0.143405
PTGES3	-0.68624	7.0157	-4.68945	0.000483074	0.00512101	-0.146956
FAM151B	-0.223428	6.70908	-4.68862	0.000483777	0.00512101	-0.148426
MGEA5	-2.09728	8.39588	-4.68849	0.000483891	0.00512101	-0.148664
EIF4G1	1.44071	8.35286	4.68569	0.000486268	0.00514179	-0.153617
HDAC11	2.20412	11.0642	4.68433	0.00048743	0.0051497	-0.15603
RIMS2	1.49699	8.31248	4.68153	0.000489823	0.00516938	-0.160979
TPPP2	-1.62109	13.2886	-4.68118	0.000490125	0.00516938	-0.161602
MTPAP	1.34849	9.13049	4.67937	0.000491675	0.00517438	-0.164795
ZNF385B	-0.996226	7.23447	-4.67922	0.000491809	0.00517438	-0.165069
WDR5	-0.769413	8.10346	-4.67917	0.000491847	0.00517438	-0.165149
TMEM167B	-1.35606	7.27212	-4.6784	0.000492518	0.00517706	-0.166526
PPP1R3D	-0.58399	6.99801	-4.67412	0.000496221	0.00521158	-0.174097
CTNNBL1	-0.946096	7.29463	-4.67124	0.000498736	0.00523357	-0.179207
LRRC6	-2.18535	7.99989	-4.6677	0.000501843	0.00525752	-0.185483
METTL2A	2.00867	9.75034	4.66732	0.000502176	0.00525752	-0.186155
IL23A	-0.553374	7.02976	-4.66707	0.000502395	0.00525752	-0.186594
CD46	-1.24046	7.24508	-4.66671	0.00050271	0.00525752	-0.187228
FAM63A	1.69257	10.2678	4.66589	0.000503435	0.00526069	-0.188686
DDX43	-0.872697	7.02485	-4.66466	0.000504525	0.00526765	-0.190871
TAF5	-0.829141	7.00945	-4.66292	0.000506065	0.0052793	-0.193952
TMEM14B	-0.235026	6.81785	-4.66086	0.000507898	0.00529398	-0.197606
EIF2S3	-0.843133	7.53454	-4.66007	0.000508597	0.00529682	-0.198995
ZNF362	0.917362	7.68905	4.65796	0.000510489	0.00531128	-0.202747
FAM219A	1.14631	7.69015	4.65756	0.00051084	0.00531128	-0.203442
SH3GLB1	-1.13913	7.71573	-4.65633	0.000511944	0.00531467	-0.205625
RWDD2A	-1.6438	7.62716	-4.65625	0.000512021	0.00531467	-0.205776
HOXD8	-0.628776	6.89792	-4.65479	0.000513328	0.00531958	-0.208353
COPS3	-0.512645	6.97526	-4.65477	0.000513349	0.00531958	-0.208394
HPCAL4	-0.454316	6.88501	-4.65279	0.000515136	0.00533124	-0.211906
SCNM1	-0.73425	7.10287	-4.65211	0.000515751	0.00533124	-0.213112
BAZ1B	-0.207197	6.70958	-4.6521	0.000515761	0.00533124	-0.213131
RSF1	-0.65448	7.04052	-4.65121	0.000516565	0.00533512	-0.214705
SESN3	-2.25669	9.48041	-4.64661	0.00052076	0.00537146	-0.222879
CHSY1	-1.54895	7.39992	-4.64634	0.000521006	0.00537146	-0.223356
DEUP1	-0.556768	6.96034	-4.64593	0.000521379	0.00537146	-0.224081
TMEM94	-0.334845	6.80023	-4.64388	0.000523256	0.00538633	-0.227711
WDR73	-0.390296	7.02711	-4.64319	0.000523891	0.0053884	-0.228936
HOXB7	-0.520798	6.83816	-4.638	0.000528694	0.00543332	-0.23816
ZW10	-1.00604	6.92204	-4.63656	0.000530036	0.00544261	-0.240721
BUB1B	-0.349426	6.83461	-4.63293	0.000533421	0.00547285	-0.247155
ABRA	-0.586902	6.95987	-4.6323	0.000534012	0.00547439	-0.248272
NEDD1	-1.01932	7.37437	-4.62905	0.000537078	0.00550129	-0.254057
WDR63	-0.706441	6.96	-4.62713	0.000538891	0.00551532	-0.257463
BEX4	-2.47012	8.13755	-4.62624	0.000539738	0.00551944	-0.259049
LYRM1	-1.87892	8.92738	-4.62548	0.000540453	0.00552221	-0.260388
NDUFAF5	0.658151	7.4358	4.62481	0.000541097	0.00552426	-0.261592
DHX32	-1.55005	9.06948	-4.62415	0.000541719	0.00552606	-0.262751
TXNDC15	1.19123	7.70704	4.62331	0.000542521	0.00552971	-0.264247
HSF5	-1.92478	7.4669	-4.62258	0.000543226	0.00553236	-0.265558
RPA1	-0.907319	7.39413	-4.62205	0.000543728	0.00553295	-0.266493
UBE2G1	-1.1194	7.31657	-4.62131	0.000544434	0.0055356	-0.267803
RABEPK	-1.21982	7.46357	-4.6199	0.000545789	0.00554484	-0.270314
NCBP2	-1.21038	7.52048	-4.61893	0.00054672	0.00554977	-0.272037
CFAP53	-2.18892	8.89765	-4.61784	0.000547771	0.0055559	-0.273978
LAPTM4B	-0.443619	6.87283	-4.61625	0.000549305	0.00556691	-0.276802
G3BP1	-1.85534	7.87405	-4.61548	0.000550047	0.00556989	-0.278166
FAM110B	-0.410798	6.82896	-4.61492	0.000550591	0.00557087	-0.279165
AAMDC	-1.6882	8.35667	-4.61205	0.000553385	0.00559459	-0.284279
ALPK1	-0.609422	7.10132	-4.61155	0.000553864	0.00559488	-0.285153
PFDN2	-0.710037	7.29647	-4.61	0.000555385	0.00560569	-0.287923
UAP1	-0.869077	7.18013	-4.60652	0.000558797	0.00563556	-0.294112
HNRNPA3	2.55218	10.6272	4.60293	0.000562341	0.0056667	-0.300499
CCL16	1.41502	7.74012	4.60053	0.000564725	0.0056786	-0.304773
SLC9B1	-2.35849	8.87633	-4.60012	0.000565135	0.0056786	-0.305506
ZBBX	-1.11796	7.40148	-4.60003	0.000565222	0.0056786	-0.305662
C15orf48	-2.72596	9.63746	-4.59974	0.000565511	0.0056786	-0.306178
TREML1	0.272174	6.98654	4.59944	0.000565805	0.0056786	-0.306703
ST13	-0.277381	6.82626	-4.59845	0.000566795	0.00568264	-0.30847
ZNF827	0.825351	7.69557	4.59777	0.000567475	0.00568264	-0.30968
ZBTB41	-0.303685	6.79308	-4.59767	0.000567578	0.00568264	-0.309864
ZNHIT3	-1.46624	8.27399	-4.59704	0.000568209	0.00568437	-0.310986
HNRNPC	1.50868	9.45434	4.59491	0.000570342	0.00569721	-0.314772
NSD1	0.989142	7.64306	4.59485	0.000570408	0.00569721	-0.314889
NCAPD3	-0.337757	6.97506	-4.59248	0.000572787	0.00571638	-0.319093
EGR1	-0.93356	7.49556	-4.59182	0.000573456	0.00571847	-0.320272
RABGGTB	-0.562003	7.05393	-4.59051	0.000574789	0.00572716	-0.322617
TIAL1	-0.555934	6.88378	-4.58787	0.000577462	0.0057492	-0.327305
MAPK1IP1L	-0.357218	6.78046	-4.58669	0.000578667	0.00575658	-0.329411
ROPN1	-3.25805	10.3745	-4.58466	0.000580743	0.00577261	-0.333027
TMEM116	-0.558627	6.97017	-4.5838	0.000581627	0.00577679	-0.334565
RACGAP1	-0.631726	6.92092	-4.58284	0.000582612	0.00578195	-0.336273
IL20RB	-0.381514	6.99823	-4.58112	0.000584386	0.00579492	-0.339344
OXCT2	1.35574	9.78826	4.58014	0.000585397	0.00580033	-0.341091
SULT1A1	2.04866	10.0408	4.57771	0.000587912	0.00581992	-0.345421
MCF2	-0.3128	6.84509	-4.57732	0.000588311	0.00581992	-0.346105
FAM83D	-0.903635	7.02306	-4.57335	0.000592449	0.0058562	-0.353185
IMMP1L	-0.63868	7.05033	-4.57217	0.000593685	0.00585941	-0.355291
NEK8	1.19638	7.61236	4.57214	0.000593716	0.00585941	-0.355342
GTF2H3	-0.551844	6.79214	-4.56916	0.000596854	0.00588571	-0.360668
NPRL2	1.13578	9.18561	4.56863	0.000597411	0.00588653	-0.361609
COX7A2	-1.24539	7.30898	-4.56784	0.000598244	0.00588699	-0.363017
GYG1	-1.83967	8.14744	-4.56769	0.000598404	0.00588699	-0.363287
TTYH2	-0.197935	6.68175	-4.56335	0.000603005	0.00592756	-0.371023
TMED2	-0.269818	6.71556	-4.56151	0.000604974	0.00594222	-0.374315
GOLPH3	-0.188048	6.97662	-4.56082	0.000605713	0.00594478	-0.375548
MGST2	-2.02112	8.06667	-4.55922	0.000607424	0.00595374	-0.378397
RNF26	1.2667	7.86764	4.55907	0.000607583	0.00595374	-0.378661
NLGN4X	1.72237	7.77678	4.55679	0.000610035	0.00596895	-0.382729
FIBCD1	1.55824	8.19534	4.55657	0.000610279	0.00596895	-0.383133
TFAP2D	1.58845	7.48837	4.55629	0.000610575	0.00596895	-0.383623
FOXN3	-0.706337	7.57904	-4.55461	0.000612394	0.00598202	-0.386627
BCL2L12	1.15021	7.81223	4.55325	0.000613866	0.00598844	-0.389052
YIPF6	-0.761391	7.21852	-4.55312	0.000614013	0.00598844	-0.389294
LSM14A	-1.64459	9.49488	-4.5521	0.000615115	0.00599003	-0.391104
DBN1	0.868781	7.51651	4.55208	0.00061514	0.00599003	-0.391145
RASA1	-1.81881	7.39521	-4.54748	0.000620164	0.00603088	-0.39936
SEC62	-0.453566	6.95729	-4.54713	0.000620546	0.00603088	-0.399981
MIER3	1.40925	7.74919	4.54691	0.00062079	0.00603088	-0.400378
CCDC136	-2.47386	11.722	-4.54559	0.000622244	0.00603923	-0.402741
SERPINB6	-1.94071	11.8656	-4.54524	0.000622621	0.00603923	-0.403352
ASPHD2	1.84812	8.59824	4.54367	0.000624358	0.00605136	-0.406166
NSF	-1.20592	7.81681	-4.54295	0.000625149	0.0060543	-0.407444
EIF2A	-0.769749	7.00878	-4.5423	0.000625866	0.00605654	-0.408603
CEP55	-1.35715	7.84292	-4.54186	0.000626357	0.00605657	-0.409394
DPYSL2	-0.758932	7.00857	-4.53579	0.000633121	0.00611423	-0.42024
SLX4	-0.434825	6.97689	-4.53527	0.000633707	0.00611423	-0.421174
POLR3F	-0.908039	7.27512	-4.53519	0.000633795	0.00611423	-0.421315
DIP2B	1.70497	11.6501	4.53198	0.00063741	0.00614434	-0.427058
WDR70	-0.259091	6.81229	-4.52853	0.000641312	0.00617579	-0.43322
RASSF7	1.01912	8.23618	4.52822	0.000641667	0.00617579	-0.433778
REEP1	-0.276621	6.88621	-4.52487	0.000645484	0.00620773	-0.439768
COPRS	-1.33437	7.86838	-4.52306	0.000647555	0.00622283	-0.443001
PIGA	-1.72998	7.47739	-4.52195	0.000648835	0.00622643	-0.444996
RTF1	-0.259347	6.80635	-4.52186	0.00064893	0.00622643	-0.445144
FZD4	-0.547386	6.93554	-4.51962	0.000651513	0.00624456	-0.449154
DCTN6	-0.248677	6.77963	-4.51935	0.000651825	0.00624456	-0.449637
BRAP	-1.79736	8.22709	-4.51492	0.000656961	0.00627991	-0.457562
MAOA	-1.40328	7.35879	-4.51489	0.000656997	0.00627991	-0.457617
CCDC3	-0.254286	6.7505	-4.51487	0.000657029	0.00627991	-0.457666
ASB2	0.301466	7.09116	4.51421	0.000657793	0.00628237	-0.458839
TLL1	0.216226	6.67387	4.51324	0.000658921	0.00628833	-0.460569
PDCD5	-0.816678	7.1956	-4.50988	0.000662861	0.0063199	-0.466588
IDO2	2.03446	9.4	4.50955	0.000663246	0.0063199	-0.467174
ROPN1L	-2.75696	9.7695	-4.50879	0.000664142	0.00632359	-0.468537
TMEM168	-0.582721	6.80501	-4.5003	0.00067422	0.00641463	-0.483741
LGALS12	1.67303	8.31675	4.49935	0.000675359	0.00642056	-0.485445
HEXB	-1.53907	7.65315	-4.49835	0.000676564	0.0064271	-0.487244
ENDOV	-0.299892	6.7412	-4.49685	0.00067837	0.00643934	-0.489935
ZNF473	-0.786242	7.08483	-4.49222	0.000683966	0.00648725	-0.498228
PADI1	1.51317	8.07207	4.49163	0.000684676	0.00648725	-0.499276
DNAJB12	-0.363394	6.78109	-4.49138	0.000684983	0.00648725	-0.499728
ZDHHC8	0.855287	7.39576	4.48744	0.000689796	0.00652786	-0.506795
ZNF136	1.91337	10.5487	4.48588	0.000691709	0.00654099	-0.50959
NTPCR	-0.56285	6.82217	-4.48388	0.000694164	0.00655652	-0.513166
IRX1	0.171437	6.81669	4.48369	0.000694405	0.00655652	-0.513518
C14orf28	-1.48563	8.03051	-4.48292	0.00069536	0.00656055	-0.514904
SWSAP1	1.98901	11.0405	4.48221	0.000696228	0.00656376	-0.516163
C11orf1	2.27315	9.43998	4.48047	0.000698393	0.00657918	-0.519297
ETS2	-0.177445	6.64789	-4.47801	0.000701445	0.00660245	-0.523699
NKX2-2	1.2793	8.08884	4.47733	0.0007023	0.00660245	-0.524928
MFAP4	0.673657	7.45513	4.4772	0.000702456	0.00660245	-0.525152
PPM1D	-0.628772	6.92145	-4.47544	0.000704664	0.0066182	-0.528319
ELF5	-0.82856	7.06512	-4.4738	0.000706722	0.00663252	-0.531262
APTX	-0.268234	6.8403	-4.47172	0.000709337	0.00665204	-0.53499
HTRA2	-0.363313	6.78387	-4.47053	0.000710833	0.00665863	-0.537117
PRKAG2	-0.654897	7.21474	-4.47031	0.000711111	0.00665863	-0.537511
PTEN	-1.51269	7.5294	-4.46954	0.000712094	0.00666261	-0.538905
PRDM5	-0.307482	6.67764	-4.46839	0.000713542	0.00666261	-0.540955
GINS1	2.05066	10.2265	4.46836	0.000713583	0.00666261	-0.541013
RALGPS2	-1.66081	9.80983	-4.46829	0.000713679	0.00666261	-0.541148
TLR2	-0.461284	6.86028	-4.46545	0.00071729	0.0066913	-0.546242
ARHGAP32	-0.397179	6.8701	-4.463	0.000720416	0.00671543	-0.550631
SOCS2	-0.833044	7.07183	-4.46182	0.000721939	0.00672458	-0.552762
FTL	-1.44633	7.35717	-4.46135	0.00072254	0.00672514	-0.553601
LYPLAL1	-0.598833	7.06896	-4.46021	0.000724002	0.00673082	-0.555641
STAT4	-1.47876	7.82892	-4.46003	0.000724233	0.00673082	-0.555963
AP3D1	-0.435476	7.0585	-4.45957	0.000724827	0.00673131	-0.556791
OR52D1	1.25498	7.72533	4.45817	0.000726639	0.0067431	-0.55931
MRPL51	-0.208174	6.73039	-4.45763	0.000727333	0.00674451	-0.560273
TOE1	-0.416613	6.80487	-4.45619	0.000729208	0.00675686	-0.562872
DNAJC1	-0.288501	6.77795	-4.45462	0.000731242	0.00677066	-0.565683
CREB1	1.82038	10.9207	4.45377	0.000732347	0.00677584	-0.567206
ZNF416	-0.50308	6.90174	-4.45306	0.000733281	0.00677945	-0.568493
CORO1C	-0.859852	7.19136	-4.44981	0.00073754	0.00681375	-0.574336
ILKAP	-1.04552	7.26046	-4.44606	0.000742473	0.00685423	-0.581062
CBFA2T2	-0.499025	6.73219	-4.44485	0.000744083	0.006864	-0.583247
ALS2CR11	-2.04291	7.97867	-4.44291	0.000746655	0.00688262	-0.586729
CYSLTR1	0.789075	7.16263	4.44215	0.000747665	0.00688683	-0.588094
TNFSF15	2.32439	9.4904	4.44103	0.000749156	0.00688996	-0.590104
IFIT2	-0.586454	6.73767	-4.4408	0.000749472	0.00688996	-0.59053
BLZF1	2.05691	11.9076	4.44065	0.000749668	0.00688996	-0.590793
MFSD14A	-0.686505	7.02507	-4.43938	0.000751364	0.00689716	-0.593073
YARS	-0.419199	7.0531	-4.43896	0.000751932	0.00689716	-0.593836
METTL21A	1.61921	11.8795	4.43837	0.000752715	0.00689716	-0.594886
RTN1	-0.739112	7.37874	-4.4381	0.000753083	0.00689716	-0.595378
POLR3GL	-1.1241	7.04787	-4.43798	0.000753241	0.00689716	-0.595591
UBE2A	-0.488025	6.86931	-4.43728	0.000754182	0.00689716	-0.59685
RBMXL1	-0.234069	6.70159	-4.437	0.000754559	0.00689716	-0.597354
SCFD2	2.11922	8.58645	4.43657	0.000755138	0.00689716	-0.598129
PIGN	-0.311632	6.81462	-4.43634	0.000755443	0.00689716	-0.598536
NRG4	-0.805557	7.23843	-4.4352	0.00075698	0.00690083	-0.600586
C4orf17	-1.17695	7.09225	-4.43486	0.000757444	0.00690083	-0.601204
ADH4	1.38356	8.03084	4.43481	0.00075751	0.00690083	-0.601293
MARS	-1.72488	8.2415	-4.43364	0.000759089	0.00691015	-0.603393
TRPM1	-0.232569	6.71037	-4.43293	0.000760056	0.0069139	-0.604678
TTC37	-0.739822	7.27279	-4.43063	0.000763181	0.00693725	-0.608817
BDH2	-0.344022	6.67627	-4.42965	0.000764514	0.00694034	-0.610578
ZNF428	2.78112	10.2894	4.42956	0.000764637	0.00694034	-0.610741
C2orf15	1.67023	11.69	4.42729	0.000767737	0.00695764	-0.614823
TMEM248	-1.56391	7.54282	-4.4272	0.00076786	0.00695764	-0.614983
GLUD2	-0.358914	6.96804	-4.42693	0.000768222	0.00695764	-0.615459
BVES	-1.34465	7.4188	-4.42597	0.000769538	0.00696448	-0.617185
NIP7	-0.257033	6.71257	-4.42119	0.000776132	0.00701757	-0.625793
GLI3	1.27968	7.9792	4.42082	0.000776652	0.00701757	-0.626469
OARD1	-1.83855	9.7947	-4.42015	0.000777575	0.00701757	-0.627667
GKAP1	-1.73405	7.84222	-4.41914	0.000778975	0.00701757	-0.629482
LOC283710	1.17722	7.73162	4.41867	0.000779632	0.00701757	-0.630332
DCP2	-1.20428	7.14993	-4.41866	0.00077964	0.00701757	-0.630343
ERICH6	-1.63065	7.69865	-4.41841	0.000779987	0.00701757	-0.630791
BCL3	0.764908	7.56841	4.41834	0.000780084	0.00701757	-0.630917
ATP6AP2	-1.09502	7.08169	-4.41804	0.000780514	0.00701757	-0.631473
POMZP3	-0.321364	6.79334	-4.41743	0.00078136	0.00701757	-0.632565
CCNT1	1.25176	8.98393	4.4169	0.000782094	0.00701757	-0.633513
FAM217A	-2.13107	9.06362	-4.41684	0.000782176	0.00701757	-0.633618
RBM42	0.557231	7.66483	4.4156	0.000783917	0.00702398	-0.635861
ME1	-0.292904	6.88675	-4.41553	0.000784019	0.00702398	-0.635993
TIMD4	-1.77691	7.81602	-4.41217	0.000788734	0.00706113	-0.642041
CDK5RAP2	-0.864748	7.89095	-4.41174	0.000789339	0.00706146	-0.642815
GOLGA2	1.14585	13.1838	4.41106	0.0007903	0.00706498	-0.644042
GABRB1	2.41133	8.39816	4.41059	0.000790958	0.00706578	-0.644882
AMOT	-0.304567	6.83913	-4.41005	0.00079172	0.00706655	-0.645853
JAM2	-0.399624	6.73357	-4.40972	0.000792181	0.00706655	-0.64644
GOLGA8A	-1.96964	9.40465	-4.40702	0.000796019	0.0070957	-0.651315
CDK15	-0.347115	6.97633	-4.40525	0.000798543	0.00711309	-0.654507
PUM1	-2.05273	7.61615	-4.40423	0.000799995	0.00712092	-0.656339
PCDHA13	-0.212974	6.59177	-4.40166	0.000803676	0.00714339	-0.660971
SLU7	-0.541781	6.9945	-4.40157	0.000803801	0.00714339	-0.661127
CHMP4A	-0.807737	7.2794	-4.40126	0.000804241	0.00714339	-0.66168
MRPS30	-0.71039	6.95695	-4.40074	0.000804999	0.00714501	-0.662629
SAMM50	-1.25164	7.60605	-4.39959	0.000806644	0.0071545	-0.664688
ZNF33B	-0.403542	6.84331	-4.39704	0.000810336	0.00718213	-0.669294
RPL39L	-1.33253	7.49156	-4.39609	0.000811716	0.00718924	-0.67101
SPDL1	-0.545494	7.12613	-4.3946	0.00081388	0.00720327	-0.673695
TRAPPC12	-1.53154	7.99788	-4.39331	0.000815748	0.00721369	-0.676007
SSB	-0.872739	7.49669	-4.39299	0.000816217	0.00721369	-0.676587
ATF7IP2	-1.91153	8.12236	-4.39147	0.000818446	0.00722825	-0.679338
NAT14	1.62464	8.6096	4.38893	0.000822172	0.00725091	-0.683919
PDE7A	0.149808	6.58577	4.38892	0.000822177	0.00725091	-0.683925
TMEM202	-0.516276	7.135	-4.38664	0.000825546	0.00727546	-0.688049
CIR1	-0.595022	6.91962	-4.38464	0.0008285	0.00729632	-0.69165
NLRX1	0.73212	7.43399	4.38346	0.000830251	0.00730656	-0.693779
DISP2	0.9059	7.63772	4.3823	0.000831973	0.00731653	-0.695868
PYM1	-0.703279	7.05344	-4.38169	0.000832882	0.00731936	-0.69697
DENND2D	-0.395511	7.06144	-4.37786	0.000838605	0.00736444	-0.703875
FAM47B	-0.604447	6.91983	-4.37575	0.000841775	0.00738707	-0.70768
CTCFL	-0.219342	6.57574	-4.37423	0.000844076	0.00739854	-0.710432
SLC35G3	2.03775	9.31132	4.3741	0.000844273	0.00739854	-0.710667
TERB2	-0.35211	6.6451	-4.37183	0.000847714	0.00741797	-0.714769
PDIA3	-0.944231	7.20848	-4.37182	0.000847728	0.00741797	-0.714786
RPL7	-0.588798	6.99124	-4.37145	0.000848279	0.00741797	-0.715442
CTSK	-0.459185	6.86353	-4.36748	0.000854339	0.00746571	-0.722618
CAMSAP2	-0.664788	7.06025	-4.3656	0.000857216	0.00748559	-0.726008
ITM2B	-1.32651	7.19053	-4.36466	0.000858667	0.007493	-0.727714
DALRD3	-0.55541	6.7785	-4.36301	0.000861202	0.00750985	-0.730685
MRPS17	-1.19476	7.39131	-4.36259	0.000861854	0.00751027	-0.731449
XRCC5	-2.33307	8.56723	-4.36115	0.000864075	0.00752435	-0.734043
CDC25C	-0.578378	6.80407	-4.36031	0.000865377	0.00752667	-0.735561
SUPV3L1	-0.736718	7.18077	-4.3602	0.000865552	0.00752667	-0.735765
ALPI	0.340415	7.00621	4.3591	0.000867257	0.00753623	-0.73775
PACS1	1.06646	7.5916	4.3585	0.000868182	0.007539	-0.738825
DEPDC1	0.404441	7.11655	4.35764	0.000869528	0.00754411	-0.740386
SLC12A2	-1.48908	8.02911	-4.35735	0.000869985	0.00754411	-0.740915
ZNF10	-0.344793	6.82308	-4.35643	0.000871411	0.00755122	-0.742567
ASIP	0.610119	7.42116	4.3545	0.000874439	0.00757218	-0.746064
FN1	-0.689381	6.9005	-4.35358	0.000875882	0.00757537	-0.747726
FAM214A	-0.783288	6.94684	-4.35348	0.000876026	0.00757537	-0.747893
PIAS2	-1.57458	10.0787	-4.35257	0.000877465	0.00758088	-0.749546
UQCRB	1.07306	7.83446	4.35196	0.000878417	0.00758088	-0.75064
MS4A5	-2.61867	10.3349	-4.35192	0.000878492	0.00758088	-0.750726
RPS25	1.79165	9.19462	4.35007	0.000881406	0.00760075	-0.754064
COG3	-0.428714	7.28155	-4.34805	0.00088461	0.00762028	-0.757723
RPS2	-1.18371	8.37246	-4.34786	0.000884897	0.00762028	-0.758049
TANC2	-0.650518	7.04853	-4.34454	0.000890188	0.00765565	-0.764059
HOXA6	1.70179	8.21957	4.34451	0.000890235	0.00765565	-0.764112
PRR5L	0.253127	7.0106	4.34316	0.00089239	0.00766578	-0.766549
SLC15A4	-0.480273	6.78627	-4.343	0.000892645	0.00766578	-0.766837
NAA16	-0.361537	6.76076	-4.34116	0.000895595	0.00767927	-0.770163
THAP1	-0.316936	6.8697	-4.34102	0.000895821	0.00767927	-0.770417
FKBP7	-0.37711	6.92279	-4.3403	0.000896985	0.00767927	-0.771726
TIGD7	-1.31382	7.13874	-4.33969	0.000897961	0.00767927	-0.772822
UBXN10	0.700806	7.50134	4.33962	0.00089808	0.00767927	-0.772956
DLGAP5	-0.673799	7.07453	-4.33943	0.00089839	0.00767927	-0.773304
SYNCRIP	1.51499	9.97641	4.33933	0.00089854	0.00767927	-0.773472
PDZD11	-0.22354	6.85089	-4.33841	0.000900036	0.00768678	-0.775149
SLC22A5	-0.433339	6.82287	-4.33688	0.000902497	0.0077025	-0.777901
ARHGEF6	-0.646701	6.94826	-4.33452	0.000906326	0.00772988	-0.782169
ELP4	-0.416567	6.95485	-4.3333	0.000908325	0.00774162	-0.78439
ARHGAP9	-0.943372	7.4025	-4.33216	0.000910173	0.00775204	-0.786438
POLE3	-0.640938	7.04433	-4.33178	0.000910795	0.00775204	-0.787126
RPS3	-2.4308	7.78205	-4.33098	0.000912102	0.00775258	-0.788572
ARPC3	-1.50239	8.29813	-4.33098	0.000912105	0.00775258	-0.788576
PGM1	-0.650775	7.09765	-4.33022	0.000913355	0.0077579	-0.789956
MCAT	-0.355967	6.70864	-4.32936	0.000914758	0.00776128	-0.791503
MAP3K19	0.42325	7.20812	4.32864	0.000915951	0.00776128	-0.792816
CELF5	2.14758	10.0366	4.3284	0.000916342	0.00776128	-0.793246
COQ5	-0.851789	6.84216	-4.32837	0.000916398	0.00776128	-0.793308
CORO2A	0.226685	6.9014	4.32794	0.000917104	0.00776128	-0.794084
CCDC91	-2.87093	10.7989	-4.3277	0.000917497	0.00776128	-0.794516
ZKSCAN4	-0.825405	7.17343	-4.32708	0.000918514	0.0077646	-0.795633
LRRC26	0.791036	7.69147	4.32301	0.000925258	0.00780332	-0.803005
ZNF26	-0.383936	6.80305	-4.32295	0.000925359	0.00780332	-0.803115
FAM200A	1.57526	11.1051	4.32288	0.000925478	0.00780332	-0.803245
2020-03-07	-1.3235	7.45977	-4.3228	0.000925605	0.00780332	-0.803384
STARD6	-0.756964	6.93242	-4.3192	0.000931613	0.00784865	-0.809904
MDH2	-0.817092	7.23258	-4.31868	0.000932479	0.00785063	-0.81084
VAPB	-0.695876	7.03694	-4.31728	0.000934821	0.00786502	-0.813369
SRSF6	-1.73704	9.41235	-4.31558	0.000937693	0.00787993	-0.81646
CDH10	0.994281	7.66443	4.31548	0.000937861	0.00787993	-0.81664
PSMD8	-0.971745	7.93055	-4.31296	0.000942107	0.00791027	-0.821192
TMEM254	-0.184011	6.71258	-4.30972	0.000947618	0.00794747	-0.82707
SMARCAD1	-0.22239	6.65454	-4.3096	0.000947817	0.00794747	-0.827281
RAB11FIP5	-2.22483	8.83331	-4.30697	0.000952304	0.00797972	-0.83204
CCDC93	-1.62228	7.66111	-4.30585	0.000954233	0.00799049	-0.834079
FAM153A	0.57852	7.20579	4.30504	0.000955613	0.00799667	-0.835535
SSX2	0.897521	7.27421	4.30283	0.000959422	0.00802219	-0.839544
C8orf48	-1.3351	7.66617	-4.30252	0.000959954	0.00802219	-0.840102
OR2AG2	1.37379	7.97013	4.30168	0.000961415	0.00802901	-0.841635
RBM45	-0.703591	6.89688	-4.29991	0.000964483	0.00804684	-0.844845
RAD23B	-0.34748	7.15819	-4.2997	0.000964844	0.00804684	-0.845222
CPNE8	-0.63322	6.96535	-4.29795	0.000967884	0.00806678	-0.848392
CCDC191	-0.233567	6.78486	-4.29748	0.000968693	0.00806811	-0.849233
ZNF775	1.79399	9.33007	4.29511	0.000972839	0.00809723	-0.853537
CAPSL	-1.43558	7.52542	-4.29419	0.000974458	0.00810528	-0.855212
RNF10	-0.510281	7.11006	-4.29262	0.000977212	0.00812275	-0.858055
AP1S2	-1.01371	7.18567	-4.29146	0.000979245	0.00813148	-0.860149
RPS9	-1.32713	8.39428	-4.2911	0.000979876	0.00813148	-0.860798
C1orf198	-0.363052	6.93394	-4.29091	0.000980224	0.00813148	-0.861156
SHCBP1L	-2.24745	8.66091	-4.28915	0.00098332	0.00814864	-0.864333
NEFH	-1.75519	8.17479	-4.28899	0.000983604	0.00814864	-0.864624
SC5D	-0.290093	6.75783	-4.28777	0.000985778	0.00816122	-0.866849
RBMY1F	-0.610606	6.8589	-4.28731	0.000986581	0.00816244	-0.867669
H2AFZ	-1.12799	7.24554	-4.28567	0.000989515	0.00818126	-0.87066
CPNE9	0.295238	6.82863	4.28526	0.000990231	0.00818174	-0.871389
DNAJC30	1.5791	8.93723	4.28463	0.000991355	0.00818559	-0.872532
INSIG2	-0.277723	6.97978	-4.28216	0.000995784	0.00821671	-0.877023
RPS27A	-0.275339	6.83078	-4.28	0.000999661	0.00824323	-0.880937
RECQL5	0.670705	7.60315	4.27916	0.00100117	0.00825023	-0.88246
DEDD	-0.286959	6.87561	-4.27853	0.00100231	0.00825414	-0.883605
TCTE3	-2.04994	7.71764	-4.27649	0.00100599	0.00827437	-0.887296
RDX	-0.285462	6.65099	-4.27643	0.0010061	0.00827437	-0.887404
HSPA9	-0.998294	7.42361	-4.27597	0.00100694	0.00827567	-0.888246
IPO5	-0.97621	7.07416	-4.27561	0.00100759	0.00827567	-0.888893
ATP23	-0.856231	7.11127	-4.27496	0.00100878	0.00827997	-0.890082
SYCE1	-0.383712	6.81457	-4.27298	0.00101239	0.00830413	-0.893682
CD53	-0.328917	6.82246	-4.27213	0.00101393	0.00831132	-0.895218
GFM1	-1.01929	7.1356	-4.27137	0.00101532	0.00831375	-0.896597
RPL38	-1.65378	7.92459	-4.27121	0.00101562	0.00831375	-0.896887
FGF12	0.615976	7.07997	4.27087	0.00101624	0.00831375	-0.897502
NUP50	-1.09881	7.33514	-4.26883	0.00101997	0.00833578	-0.901198
RPS5	-1.62599	9.53548	-4.26867	0.00102027	0.00833578	-0.901493
ABHD12	-1.04659	7.20466	-4.26797	0.00102156	0.0083408	-0.902761
CASC4	-0.593798	7.18543	-4.26613	0.00102496	0.00836308	-0.906108
KLK9	1.75699	8.99205	4.26046	0.00103548	0.00844338	-0.916394
HNRNPD	-2.27973	8.66539	-4.25982	0.00103669	0.00844771	-0.917571
ADH5	-0.76976	6.95387	-4.25941	0.00103744	0.0084483	-0.9183
USP14	1.86111	10.1135	4.25537	0.00104503	0.00850453	-0.92564
NOP14	-0.63493	7.20166	-4.25494	0.00104584	0.00850556	-0.926422
ZNF750	0.78326	7.59072	4.25257	0.00105032	0.00853641	-0.930726
SMIM19	-1.1208	7.52785	-4.25163	0.0010521	0.00854102	-0.932433
TMEM156	2.21217	8.54879	4.25155	0.00105226	0.00854102	-0.932586
CCDC88B	1.07411	8.12023	4.25071	0.00105385	0.00854465	-0.934103
C18orf54	-0.684324	7.02123	-4.25042	0.00105441	0.00854465	-0.934642
LAS1L	-0.65748	7.11787	-4.25023	0.00105477	0.00854465	-0.934983
CAMTA2	0.609394	7.18233	4.24668	0.00106155	0.00859396	-0.941434
PCDHGB1	0.788947	7.72783	4.24273	0.00106913	0.00864976	-0.948607
SGMS2	-0.827871	7.08684	-4.24204	0.00107047	0.00865491	-0.94986
BEX1	-0.777565	7.10259	-4.23711	0.00108003	0.00872659	-0.95882
LYPD6B	-0.634174	7.5852	-4.23656	0.00108111	0.00872964	-0.959825
DRAM2	-0.407038	6.7219	-4.23476	0.00108464	0.00875246	-0.963108
ITK	-0.309322	6.79379	-4.23439	0.00108536	0.00875254	-0.96377
TRIM50	0.284456	7.06255	4.23354	0.00108704	0.00876039	-0.965326
MOB3A	1.08686	7.63411	4.23265	0.00108878	0.00876875	-0.966938
CEP41	-0.783979	7.17815	-4.23152	0.001091	0.00877467	-0.968994
DENND1C	0.292147	6.92799	4.2314	0.00109124	0.00877467	-0.969217
PASK	-0.917451	7.10463	-4.2312	0.00109163	0.00877467	-0.969572
TSPYL5	-0.79672	7.13186	-4.2287	0.00109658	0.00880879	-0.97413
PCBP1	-1.89939	8.40257	-4.22723	0.0010995	0.00882632	-0.976805
ASXL1	-1.14516	7.73143	-4.22688	0.00110018	0.00882632	-0.977432
RPF1	-0.773999	6.99617	-4.22307	0.00110778	0.00888152	-0.984357
PRRC2C	-0.471827	6.71206	-4.22194	0.00111006	0.00889405	-0.986426
PSMD1	-0.533404	6.86895	-4.22061	0.00111273	0.00890969	-0.988843
C1QB	-0.367871	6.80017	-4.21909	0.00111578	0.00892475	-0.9916
PRPF19	1.71264	8.74473	4.21896	0.00111604	0.00892475	-0.991839
KIRREL2	0.323358	7.14643	4.21842	0.00111714	0.00892709	-0.992826
MFSD6L	-1.7366	8.46359	-4.21811	0.00111777	0.00892709	-0.993396
GGCT	-0.846338	6.96854	-4.21734	0.00111932	0.00893373	-0.994792
HLA-DQB1	-0.468205	7.00084	-4.21518	0.0011237	0.00896289	-0.998718
MOB2	0.861186	7.65346	4.2145	0.00112509	0.00896828	-0.999969
RB1CC1	-0.3491	6.83319	-4.21336	0.00112741	0.00898099	-1.00204
CHERP	-0.294801	6.91552	-4.21274	0.00112867	0.00898532	-1.00317
TAF7L	-0.400817	6.70391	-4.21174	0.00113071	0.00899575	-1.00498
ZNF385D	1.14171	9.29698	4.2113	0.0011316	0.00899599	-1.00578
ZNF417	1.23305	13.9912	4.21102	0.00113218	0.00899599	-1.00629
NAA30	-0.775652	6.78115	-4.20964	0.00113502	0.00901272	-1.00881
TCP11L1	0.839299	7.43823	4.20586	0.0011428	0.0090645	-1.01569
DHX36	-1.35203	7.71905	-4.20577	0.00114299	0.0090645	-1.01586
ZNF746	-0.322697	6.84101	-4.20245	0.00114987	0.00911324	-1.0219
ATP10B	2.05216	8.81462	4.20138	0.00115211	0.00912512	-1.02385
CRTC3	-0.863034	7.39251	-4.19962	0.00115579	0.00914844	-1.02706
DENND1A	-0.448638	6.98913	-4.19813	0.00115889	0.0091672	-1.02976
PPP2R2A	-0.993707	7.3813	-4.19695	0.00116138	0.00918106	-1.03192
SORCS1	0.703175	7.44311	4.19473	0.00116606	0.00920756	-1.03597
METTL14	-1.5918	8.01699	-4.19465	0.00116622	0.00920756	-1.0361
PFN4	-1.66117	8.52947	-4.19394	0.00116773	0.00921247	-1.03741
CCNI	-1.0586	7.18654	-4.19366	0.00116832	0.00921247	-1.03792
LYPLA1	-1.00539	7.78877	-4.19122	0.00117349	0.00924735	-1.04236
C9orf135	-1.53059	7.51277	-4.18928	0.00117761	0.00926868	-1.04589
MAP3K7	-0.853831	7.49437	-4.18925	0.00117768	0.00926868	-1.04595
TPK1	-0.624979	6.84928	-4.18814	0.00118006	0.00928068	-1.04798
ADAD1	-1.70573	8.47721	-4.18784	0.0011807	0.00928068	-1.04852
FAM76B	-0.542588	6.89793	-4.18632	0.00118395	0.0093003	-1.05129
RNF168	-1.10586	7.4967	-4.18576	0.00118514	0.00930381	-1.0523
TULP4	-0.78464	7.0569	-4.18527	0.0011862	0.00930622	-1.0532
POP1	-0.218914	6.81459	-4.18452	0.00118782	0.00930823	-1.05457
FBXL13	-1.72436	7.44937	-4.18446	0.00118795	0.00930823	-1.05468
RTCB	-0.39068	6.9666	-4.18397	0.00118901	0.00931066	-1.05558
MFSD10	-0.548271	6.92964	-4.18248	0.00119222	0.00932997	-1.0583
OGT	-1.43753	7.35932	-4.18018	0.0011972	0.0093602	-1.06248
TMEM167A	-0.410493	6.88456	-4.18	0.00119759	0.0093602	-1.06282
NDUFS2	-0.672537	7.27522	-4.17922	0.00119928	0.00936753	-1.06424
JKAMP	-0.236738	6.72278	-4.17848	0.00120089	0.00937421	-1.06559
DLG5	-2.03958	9.35664	-4.17395	0.00121079	0.00944555	-1.07385
WLS	-1.23218	7.35436	-4.17163	0.0012159	0.00947943	-1.07808
ORMDL3	1.63033	8.3796	4.16963	0.00122031	0.00950676	-1.08172
UVRAG	-0.189507	6.60583	-4.1693	0.00122103	0.00950676	-1.08232
CREBRF	-0.346246	6.82513	-4.169	0.0012217	0.00950676	-1.08287
CCDC89	-1.11275	7.13854	-4.16713	0.00122586	0.00953318	-1.08629
DERL1	-1.38292	7.97637	-4.16555	0.00122937	0.00954929	-1.08916
FZD8	0.718741	7.4233	4.16519	0.00123016	0.00954929	-1.08981
POMGNT2	0.943826	7.72809	4.16493	0.00123076	0.00954929	-1.0903
ZFYVE16	-0.3405	6.79447	-4.16482	0.001231	0.00954929	-1.0905
FAM204A	-0.4232	6.93593	-4.16305	0.00123496	0.00957401	-1.09373
ZNF160	1.92336	9.17319	4.16185	0.00123764	0.00958882	-1.09591
LONRF1	-1.17904	7.60969	-4.1614	0.00123866	0.00959077	-1.09674
BRD9	1.49575	9.36428	4.16104	0.00123948	0.0095911	-1.0974
LONP2	-0.227382	6.82848	-4.15993	0.00124197	0.00960445	-1.09943
NELFCD	-1.21293	7.43453	-4.15829	0.00124566	0.00962491	-1.10241
ATP5J	-1.67926	8.5164	-4.15781	0.00124674	0.00962491	-1.10328
NAV2	-0.458505	6.76682	-4.15773	0.00124694	0.00962491	-1.10344
SNRNP27	-0.742831	6.95485	-4.15701	0.00124856	0.00963145	-1.10475
GTF2E2	-1.16182	9.91524	-4.15456	0.00125413	0.00966842	-1.10923
TXNDC8	-1.15981	7.02809	-4.15379	0.00125589	0.00967198	-1.11063
NPTX2	-0.296784	6.675	-4.15367	0.00125615	0.00967198	-1.11085
UBE2G2	-0.611526	6.88007	-4.15101	0.00126223	0.00971268	-1.1157
ZSCAN16	-0.600763	6.94067	-4.15068	0.001263	0.00971268	-1.11631
NDUFAB1	-0.49867	6.81594	-4.1479	0.00126939	0.00974414	-1.12139
ZDHHC6	-0.853776	7.36373	-4.14781	0.0012696	0.00974414	-1.12156
TMEM106C	-1.1268	7.2249	-4.14762	0.00127003	0.00974414	-1.12189
LAMTOR5	-1.67518	8.19574	-4.14753	0.00127022	0.00974414	-1.12205
TMEM123	-0.409864	6.75728	-4.14671	0.00127213	0.009751	-1.12356
SNX27	1.91091	10.4538	4.14627	0.00127314	0.009751	-1.12435
PIN4	-0.169549	6.62446	-4.14613	0.00127347	0.009751	-1.12462
SKIV2L2	-0.580589	6.83845	-4.14573	0.0012744	0.00975209	-1.12535
CDV3	-1.42226	7.35367	-4.14532	0.00127533	0.00975324	-1.12609
TMEM259	0.797667	7.52515	4.14421	0.00127791	0.00976149	-1.12812
CMTM2	-2.78811	11.9671	-4.14368	0.00127914	0.00976149	-1.12909
MED21	-0.216485	6.74651	-4.14352	0.00127951	0.00976149	-1.12938
CPSF3	-1.46362	7.89155	-4.1435	0.00127955	0.00976149	-1.12941
DNAJC5B	-2.6509	9.18289	-4.14271	0.00128141	0.00976965	-1.13087
SAA4	1.24487	8.75698	4.14075	0.00128597	0.00979653	-1.13444
TEX11	-0.981788	8.16175	-4.14052	0.00128651	0.00979653	-1.13486
FAM101B	1.20628	8.03658	4.13924	0.0012895	0.0098133	-1.1372
TNFAIP1	0.709326	7.56695	4.13508	0.00129929	0.00988178	-1.14481
ADGRL1	0.658313	7.3378	4.13438	0.00130093	0.00988643	-1.14607
CCDC83	-1.78392	8.27981	-4.13414	0.0013015	0.00988643	-1.14651
FBXO9	-1.93209	9.12964	-4.13298	0.00130426	0.00990139	-1.14864
TAS1R2	0.373461	7.03418	4.12999	0.00131135	0.0099469	-1.15409
D2HGDH	1.72405	8.85079	4.12957	0.00131236	0.0099469	-1.15487
ZSWIM4	1.15057	7.8668	4.12945	0.00131266	0.0099469	-1.1551
SORD	-3.26824	9.96945	-4.12854	0.00131482	0.00995725	-1.15675
ZNF496	-0.264925	6.83745	-4.12754	0.00131721	0.0099693	-1.15858
G0S2	-1.93609	7.91951	-4.12664	0.00131937	0.00997284	-1.16023
DSN1	1.75284	9.09683	4.12652	0.00131965	0.00997284	-1.16044
ZNF620	1.97486	9.05465	4.12634	0.00132009	0.00997284	-1.16077
FAM156A	-0.898948	7.13462	-4.12591	0.00132111	0.00997452	-1.16155
OTULIN	-0.629042	7.14422	-4.12523	0.00132275	0.00997756	-1.1628
FAM131C	0.448185	7.15639	4.12508	0.00132312	0.00997756	-1.16308
CLINT1	-0.395482	6.86815	-4.12388	0.001326	0.00999321	-1.16527
COX6A1	-0.538311	6.91378	-4.12077	0.00133351	0.0100438	-1.17095
ANO6	-0.445179	6.92994	-4.12015	0.00133503	0.0100491	-1.17209
TTC4	-0.556255	7.24537	-4.11905	0.00133769	0.010063	-1.17409
CYP4A11	2.04696	8.55341	4.11792	0.00134044	0.0100776	-1.17616
LEKR1	-0.431438	6.85981	-4.11679	0.00134322	0.010087	-1.17824
RARS	-1.03985	8.1664	-4.11673	0.00134335	0.010087	-1.17834
TNS4	0.913218	7.64464	4.11642	0.00134412	0.010087	-1.17891
SLC35G2	-0.476287	7.02628	-4.1149	0.00134782	0.0101009	-1.18168
ZDHHC5	-0.843846	7.44329	-4.11476	0.00134818	0.0101009	-1.18194
SPACA4	1.89241	9.53609	4.11427	0.00134939	0.0101009	-1.18285
TOMM22	-0.717388	7.07159	-4.11413	0.00134973	0.0101009	-1.1831
EBPL	-0.330314	7.04868	-4.114	0.00135004	0.0101009	-1.18333
SETD6	-0.877767	7.23613	-4.11333	0.00135169	0.0101054	-1.18456
SRRM2	1.4437	8.67653	4.1131	0.00135226	0.0101054	-1.18499
NUP43	2.03497	8.9889	4.11276	0.0013531	0.0101056	-1.18561
CNST	-1.50909	8.68426	-4.11199	0.001355	0.0101111	-1.18701
NMNAT3	-1.24242	7.96127	-4.11178	0.00135551	0.0101111	-1.1874
MFSD11	1.5329	8.29699	4.11147	0.00135628	0.0101111	-1.18797
NME7	-1.54539	7.28315	-4.10985	0.00136027	0.0101348	-1.19092
THAP6	0.915321	7.53684	4.10841	0.00136384	0.0101499	-1.19356
STK17B	-0.236522	6.82626	-4.10801	0.00136483	0.0101499	-1.19429
TP53INP1	-1.71125	10.0815	-4.10787	0.00136518	0.0101499	-1.19454
CHMP5	-2.98334	8.46806	-4.10747	0.00136619	0.0101499	-1.19528
TCP11	-1.95433	13.5332	-4.10716	0.00136696	0.0101499	-1.19585
MEGF10	1.06269	7.38656	4.10706	0.00136719	0.0101499	-1.19602
ALK	1.33713	8.56187	4.10508	0.00137214	0.0101805	-1.19966
FAM126A	-0.703026	6.94738	-4.10289	0.00137763	0.0102151	-1.20367
SUCLG1	-1.46623	8.15559	-4.1006	0.00138338	0.0102517	-1.20786
HAX1	-0.798934	7.55756	-4.0999	0.00138514	0.0102537	-1.20913
DENND4A	-0.348252	6.80176	-4.09983	0.0013853	0.0102537	-1.20925
SRPK1	-1.20703	7.71508	-4.09884	0.00138781	0.0102662	-1.21107
PSMB6	-1.52712	8.61447	-4.09835	0.00138906	0.0102692	-1.21197
LAMP3	-1.53118	8.47932	-4.09802	0.00138987	0.0102692	-1.21256
EPM2AIP1	-0.321929	7.02206	-4.09632	0.0013942	0.0102951	-1.21569
HERC4	-1.44864	7.72251	-4.09435	0.00139921	0.0103259	-1.21929
EFHD1	-0.639116	6.99754	-4.09322	0.0014021	0.0103263	-1.22136
VAV3	-0.211554	6.85822	-4.0932	0.00140213	0.0103263	-1.22139
MAP4K2	1.39939	8.24153	4.09299	0.00140267	0.0103263	-1.22177
CRIPAK	-1.78353	8.01278	-4.09275	0.00140328	0.0103263	-1.22221
SIRPD	-1.21662	7.26637	-4.0927	0.00140342	0.0103263	-1.22231
CHD6	-0.202743	6.62617	-4.09234	0.00140433	0.0103269	-1.22296
NOX1	1.10088	7.68629	4.09168	0.00140602	0.0103333	-1.22417
MESP2	0.219122	7.09201	4.08831	0.00141469	0.0103884	-1.23035
MIPOL1	-1.39229	7.88533	-4.08809	0.00141524	0.0103884	-1.23074
TSC22D3	-1.03576	7.47091	-4.08779	0.00141602	0.0103884	-1.2313
C10orf107	-0.625606	6.75167	-4.08665	0.00141897	0.0104038	-1.23338
KLHL10	-2.33012	11.1424	-4.0848	0.00142375	0.0104327	-1.23677
KDM6B	1.04314	8.30778	4.08403	0.00142575	0.0104412	-1.23818
RTN4R	0.838828	7.53892	4.08228	0.00143031	0.0104685	-1.24139
ACTL8	1.51271	8.10896	4.08141	0.00143259	0.010479	-1.24298
B9D1	-0.329024	6.93299	-4.08109	0.00143343	0.010479	-1.24358
MCM3AP	-0.386427	6.83794	-4.08073	0.00143436	0.0104796	-1.24423
YTHDC1	-2.22506	8.61993	-4.07751	0.0014428	0.0105351	-1.25012
METTL7A	-0.691127	6.87392	-4.07662	0.00144514	0.0105459	-1.25175
TMEM234	0.443905	7.53465	4.07469	0.00145023	0.0105769	-1.25529
ACAP1	1.97651	10.24	4.07416	0.00145165	0.0105811	-1.25627
SVOPL	-0.203233	6.70018	-4.07248	0.00145609	0.0105962	-1.25933
ST6GALNAC6	1.61227	8.50266	4.07247	0.00145612	0.0105962	-1.25935
RASGRP3	0.213748	6.8464	4.07225	0.00145671	0.0105962	-1.25976
FAM109A	0.476954	7.23347	4.07209	0.00145714	0.0105962	-1.26006
FAM184A	-1.18119	7.13186	-4.07144	0.00145886	0.0106025	-1.26125
CHN1	-1.99621	8.26259	-4.0711	0.00145978	0.010603	-1.26188
APH1B	-2.47898	11.6648	-4.07014	0.00146233	0.0106154	-1.26364
GSS	1.80839	10.1079	4.06896	0.00146548	0.010632	-1.2658
RMDN2	-1.27252	7.78198	-4.06852	0.00146666	0.0106344	-1.26661
LIMS1	-0.879376	7.38379	-4.06681	0.00147123	0.0106613	-1.26973
KCNJ6	0.958544	7.34845	4.06636	0.00147244	0.0106638	-1.27056
RPL15	-2.33984	8.00893	-4.06536	0.00147513	0.0106771	-1.27239
ABI2	-0.721297	7.58001	-4.06431	0.00147795	0.0106913	-1.27431
MTMR9	-0.39537	7.14555	-4.06356	0.00147997	0.0106997	-1.27568
ZER1	-0.379645	6.9968	-4.06018	0.00148915	0.0107598	-1.28189
SIN3B	0.850172	7.80778	4.05727	0.00149707	0.0108107	-1.28722
SLC30A2	0.156147	6.73812	4.05582	0.00150104	0.0108331	-1.28988
TPM3	0.839544	7.9237	4.05526	0.00150256	0.0108378	-1.2909
C12orf45	-0.218858	6.63242	-4.05409	0.00150578	0.0108547	-1.29305
COQ7	-0.1947	6.6732	-4.05206	0.00151138	0.0108887	-1.29677
RBM12	-0.678289	7.08091	-4.04877	0.00152047	0.0109479	-1.3028
MMP7	-0.541819	6.97878	-4.04644	0.00152695	0.0109882	-1.30708
NDUFB4	-0.380662	6.8316	-4.04562	0.00152925	0.0109984	-1.30858
CLEC14A	0.640928	7.21586	4.04382	0.00153428	0.0110255	-1.31189
GPR171	1.03929	7.30964	4.04364	0.00153479	0.0110255	-1.31222
COL21A1	-0.340055	6.55552	-4.04233	0.00153846	0.0110442	-1.31461
DAW1	-1.40044	7.39558	-4.04208	0.00153918	0.0110442	-1.31508
CCND2	-0.503013	7.10853	-4.04054	0.0015435	0.0110657	-1.3179
WDR66	-1.32464	7.65238	-4.04038	0.00154395	0.0110657	-1.31819
BCAM	0.315006	7.04166	4.03831	0.0015498	0.0111012	-1.32199
ZNF443	-0.210992	6.75032	-4.03612	0.00155601	0.0111393	-1.32601
SCARB2	-1.20355	7.17621	-4.03349	0.00156351	0.0111862	-1.33084
TTLL7	-0.676022	6.93153	-4.03303	0.00156484	0.0111862	-1.33169
KLHL24	-0.525522	6.80033	-4.03288	0.00156526	0.0111862	-1.33196
SEPSECS	-0.152036	6.61625	-4.03135	0.00156964	0.0112066	-1.33477
CDC40	-1.32314	8.73227	-4.03126	0.00156992	0.0112066	-1.33494
MRPL27	-1.20587	7.92186	-4.03056	0.00157192	0.0112145	-1.33622
MTSS1L	0.78274	7.33514	4.0297	0.00157439	0.0112211	-1.3378
PPP1R36	-1.92976	8.92064	-4.02961	0.00157466	0.0112211	-1.33797
GDPD3	1.65546	9.83614	4.02773	0.00158006	0.0112532	-1.34141
ZNF385A	0.867561	7.51499	4.0261	0.00158479	0.0112804	-1.34441
MRPL48	-0.218869	6.85299	-4.02398	0.00159094	0.0113177	-1.3483
IPCEF1	1.56812	7.81335	4.02327	0.00159301	0.0113259	-1.3496
CDH18	-0.525685	6.81541	-4.02289	0.00159412	0.0113273	-1.3503
RUFY1	-0.241694	6.71224	-4.02086	0.00160005	0.011363	-1.35403
DEDD2	0.442126	7.15814	4.01947	0.00160411	0.0113853	-1.35658
KIRREL	0.540652	7.22953	4.01756	0.00160972	0.0114187	-1.36008
MYL12A	-2.58866	8.1091	-4.01704	0.00161125	0.0114229	-1.36103
CHRNE	0.621214	7.34331	4.01644	0.00161303	0.0114291	-1.36214
DYDC1	-0.840319	6.77794	-4.01592	0.00161457	0.0114335	-1.3631
CXorf40A	-0.489209	7.23375	-4.01506	0.00161709	0.0114448	-1.36467
TBX10	1.04732	7.71722	4.01065	0.00163021	0.0115259	-1.37278
PTPN23	0.863461	7.88778	4.01058	0.0016304	0.0115259	-1.3729
PMEPA1	-1.32749	7.62528	-4.01012	0.00163178	0.0115291	-1.37375
SEC63	-0.536702	6.90239	-4.0097	0.00163305	0.0115315	-1.37453
EIF4EBP2	-0.950691	7.48084	-4.0092	0.00163454	0.0115355	-1.37544
CASC1	-2.00781	9.166	-4.00835	0.00163707	0.0115468	-1.377
SNAPC1	2.11344	9.11634	4.00205	0.00165607	0.0116668	-1.38858
SEL1L3	-0.450004	6.84519	-4.00186	0.00165665	0.0116668	-1.38893
NEUROD6	0.261983	6.91737	4.00177	0.0016569	0.0116668	-1.38908
FOLH1B	-0.484414	6.90346	-3.9981	0.00166809	0.0117389	-1.39584
KLHL8	2.12495	8.61064	3.99741	0.0016702	0.0117459	-1.39711
COBLL1	-1.20004	6.93492	-3.99698	0.0016715	0.0117459	-1.39789
SRP54	-1.25264	13.0439	-3.99685	0.00167192	0.0117459	-1.39814
AXL	-0.464051	7.02548	-3.99597	0.00167461	0.0117582	-1.39976
PTH1R	1.13919	8.63953	3.99522	0.00167689	0.0117676	-1.40112
IFT74	-0.887506	7.15391	-3.99482	0.00167814	0.0117697	-1.40187
TRAF3IP1	-1.06402	7.31855	-3.99436	0.00167956	0.0117726	-1.40272
IQGAP1	-1.82552	8.02049	-3.99407	0.00168045	0.0117726	-1.40325
MAPK11	0.243074	6.89648	3.99201	0.00168678	0.0118103	-1.40702
LIPJ	-0.71145	7.11924	-3.99057	0.00169126	0.011835	-1.40968
KRT85	0.555417	7.40317	3.98972	0.00169388	0.0118467	-1.41124
NUP58	-0.90533	7.22075	-3.98868	0.00169713	0.0118627	-1.41316
COL9A3	1.80093	11.5675	3.98799	0.00169926	0.0118709	-1.41442
PHOX2B	0.344128	6.95967	3.98666	0.00170342	0.0118933	-1.41687
PPM1E	-0.488735	6.77127	-3.98526	0.00170779	0.0119171	-1.41944
RABEP1	-0.392251	6.76752	-3.9849	0.00170891	0.0119183	-1.4201
TMEM243	-0.541651	7.02789	-3.98432	0.00171073	0.0119243	-1.42117
RAB1A	-1.78907	10.0123	-3.98103	0.00172106	0.011986	-1.42721
VPS28	-0.36412	6.89872	-3.98063	0.00172232	0.011986	-1.42795
RPL8	-0.590964	6.71256	-3.98058	0.00172248	0.011986	-1.42804
TNFAIP6	-1.38226	7.77327	-3.9786	0.00172876	0.012023	-1.43169
KRT73	1.05427	7.65067	3.97717	0.0017333	0.0120446	-1.43432
DES	1.24519	7.82069	3.97701	0.0017338	0.0120446	-1.43461
CNOT11	-0.872122	7.22865	-3.97622	0.00173631	0.0120553	-1.43606
NFYC	-0.480367	6.97504	-3.97545	0.00173876	0.0120613	-1.43748
DHTKD1	-0.230689	6.75466	-3.97534	0.00173912	0.0120613	-1.43769
RNF14	-0.280007	6.79773	-3.97493	0.00174042	0.0120636	-1.43844
GRPEL2	-0.419413	6.75234	-3.97257	0.00174796	0.0121091	-1.44277
SPAG6	-2.1206	7.74899	-3.97203	0.00174969	0.0121143	-1.44376
CNOT8	-0.917264	7.13202	-3.97138	0.00175179	0.0121222	-1.44497
NPFFR2	0.482617	7.17115	3.96968	0.00175725	0.0121531	-1.44809
KCTD3	-1.21481	7.29998	-3.96741	0.00176457	0.0121925	-1.45226
MRPL54	-0.197621	6.4489	-3.96732	0.00176489	0.0121925	-1.45245
ASIC1	1.1191	7.67936	3.96631	0.00176816	0.0122082	-1.4543
TC2N	-0.210978	6.7406	-3.96521	0.00177171	0.012226	-1.45631
SEMA3F	0.74469	7.42336	3.96354	0.00177715	0.0122567	-1.45939
TWF1	-1.17695	7.20588	-3.96277	0.00177969	0.0122674	-1.46082
FAM188B	0.850042	7.51987	3.96052	0.00178703	0.0123112	-1.46495
SYAP1	1.26355	12.4676	3.96004	0.0017886	0.0123152	-1.46583
ZBTB8OS	-0.542269	7.22754	-3.95957	0.00179016	0.0123191	-1.4667
ZDHHC17	-0.456297	6.83803	-3.95878	0.00179273	0.01233	-1.46814
TMEM126A	-0.714736	7.37376	-3.95769	0.00179635	0.012348	-1.47017
PTOV1	1.35645	9.82973	3.95614	0.00180145	0.0123763	-1.47301
EVI5	1.7893	8.45681	3.95561	0.0018032	0.0123815	-1.47399
DCTN4	-0.255465	6.55862	-3.95468	0.00180629	0.0123903	-1.4757
FXN	1.9239	8.63069	3.95462	0.00180648	0.0123903	-1.47581
MUC13	-0.19073	6.76012	-3.95324	0.00181105	0.0124148	-1.47834
ZNF274	-0.409008	7.1433	-3.95253	0.00181342	0.0124242	-1.47965
ST3GAL5	-0.466599	7.2095	-3.95118	0.00181791	0.0124481	-1.48214
HOXA2	0.952796	7.74799	3.95	0.00182187	0.0124628	-1.48432
MYD88	-0.239998	6.82288	-3.94994	0.00182206	0.0124628	-1.48442
NEPRO	-0.320901	6.82431	-3.94934	0.00182409	0.0124698	-1.48554
CLDN12	-0.974668	7.09063	-3.94653	0.00183353	0.0125273	-1.49071
CCDC81	-1.7028	8.00614	-3.94605	0.00183514	0.0125273	-1.4916
KRAS	-1.78681	7.42026	-3.94593	0.00183553	0.0125273	-1.49181
PUM3	-0.436752	6.97272	-3.94506	0.00183847	0.0125405	-1.49341
UBR1	-0.412122	6.83211	-3.9429	0.00184576	0.0125834	-1.49738
COPE	-0.210622	6.63017	-3.94171	0.00184981	0.0125933	-1.49958
CSNK2B	-2.20829	8.37569	-3.94159	0.00185023	0.0125933	-1.49981
DPEP3	-0.769685	7.37485	-3.94158	0.00185025	0.0125933	-1.49982
LRRC3B	-0.204644	6.73964	-3.93979	0.00185633	0.0126277	-1.50311
CNTNAP4	-0.564782	6.86332	-3.93922	0.00185831	0.0126343	-1.50418
OPA3	1.16524	7.70478	3.93814	0.00186198	0.0126523	-1.50616
SOX18	-0.372102	6.99616	-3.93638	0.00186801	0.0126863	-1.5094
GRIPAP1	-0.371085	6.86249	-3.93555	0.00187087	0.0126988	-1.51093
ACSS3	-0.756843	6.98445	-3.93501	0.00187273	0.0127003	-1.51193
HARS2	-0.351964	6.95155	-3.93489	0.00187312	0.0127003	-1.51214
MMGT1	-0.414438	6.85379	-3.933	0.00187966	0.0127376	-1.51563
ARHGEF2	0.76145	8.07359	3.93216	0.00188256	0.0127461	-1.51718
SLC35D1	-1.32415	7.66708	-3.93173	0.00188404	0.0127461	-1.51797
NATD1	0.603255	7.4126	3.93141	0.00188515	0.0127461	-1.51856
STXBP6	-0.292405	6.92083	-3.93118	0.00188595	0.0127461	-1.51898
CXorf58	-0.825676	7.10007	-3.93116	0.00188603	0.0127461	-1.51902
HRASLS	-2.69538	8.31563	-3.9307	0.0018876	0.0127498	-1.51986
AGAP4	1.64493	9.67267	3.92873	0.00189445	0.0127891	-1.52349
SPATA12	1.7539	9.44733	3.9267	0.00190154	0.0128299	-1.52723
REG3A	1.73763	10.1081	3.92444	0.00190944	0.0128763	-1.53139
NSUN6	-0.929998	7.57431	-3.92259	0.00191595	0.0129132	-1.5348
SGCE	-0.333798	6.83316	-3.92161	0.00191941	0.0129295	-1.53661
FAAP24	1.21153	7.86225	3.9209	0.00192193	0.0129395	-1.53793
TMEM99	-2.79889	9.57441	-3.91979	0.00192586	0.0129589	-1.53997
PHPT1	-1.14639	9.05067	-3.9181	0.00193182	0.0129881	-1.54308
FGFBP3	0.995942	7.62307	3.91797	0.00193229	0.0129881	-1.54332
ZNF438	-0.935928	7.29929	-3.91689	0.00193613	0.0130069	-1.54531
KCNJ10	0.635175	7.15017	3.91418	0.00194581	0.0130648	-1.55031
MAP3K12	-0.184361	6.54828	-3.91341	0.00194856	0.0130763	-1.55172
LDHAL6A	-0.555715	6.7543	-3.91105	0.00195706	0.013124	-1.55609
ANKRD9	1.86711	10.4911	3.91084	0.00195779	0.013124	-1.55646
BRAF	-0.489073	7.10607	-3.91053	0.0019589	0.0131244	-1.55703
RNF183	1.8855	8.39587	3.90991	0.00196115	0.0131281	-1.55818
ZNF800	-1.08612	7.09856	-3.9098	0.00196156	0.0131281	-1.55839
ENKD1	1.63033	8.86832	3.90589	0.00197572	0.0132088	-1.5656
C5orf24	1.80236	10.8498	3.90573	0.00197628	0.0132088	-1.56588
LRP2BP	0.82852	7.42822	3.90559	0.0019768	0.0132088	-1.56614
SNRNP35	-0.460525	7.00016	-3.9034	0.00198477	0.0132549	-1.57018
SRP14	-1.12493	9.50139	-3.90192	0.00199021	0.0132841	-1.57292
COL2A1	0.56158	7.51384	3.90136	0.00199224	0.0132905	-1.57394
PRPF18	-0.682342	7.17518	-3.90098	0.00199363	0.0132927	-1.57464
RFTN2	-0.711946	7.03064	-3.90049	0.00199544	0.0132976	-1.57555
TMEM165	-0.775884	7.099	-3.89996	0.00199741	0.0133008	-1.57654
HNF4G	0.552537	7.20543	3.89978	0.00199807	0.0133008	-1.57687
NAP1L1	-0.64515	7.09322	-3.89854	0.00200261	0.0133239	-1.57914
SLC44A1	-0.404364	6.85	-3.89822	0.00200381	0.0133248	-1.57974
USP37	-0.730349	7.18248	-3.89718	0.00200765	0.0133432	-1.58166
UBE2Q2	-0.739795	6.95669	-3.89427	0.00201842	0.0134076	-1.58703
FBXO36	-0.431326	6.98617	-3.89322	0.00202231	0.0134263	-1.58896
B3GALNT1	-0.497488	6.85881	-3.89119	0.00202989	0.0134694	-1.5927
DGCR6L	1.21471	10.2742	3.89021	0.00203358	0.0134801	-1.59452
C9orf24	-1.33797	10.4863	-3.88999	0.00203437	0.0134801	-1.59491
RARB	0.212607	6.48878	3.88989	0.00203476	0.0134801	-1.5951
AP5Z1	1.13399	8.08702	3.88934	0.00203681	0.0134866	-1.59611
NUP62	-0.856506	7.78036	-3.88883	0.00203876	0.0134876	-1.59707
CAAP1	-0.646287	6.92969	-3.88872	0.00203914	0.0134876	-1.59726
CAPN2	-1.63286	8.78441	-3.88804	0.00204172	0.0134975	-1.59853
VWA3B	-1.28407	8.37519	-3.88669	0.00204679	0.0135238	-1.60101
ALDH6A1	-0.239904	6.98305	-3.88581	0.00205011	0.0135386	-1.60263
TADA2A	-1.04233	9.5055	-3.88198	0.00206462	0.0136271	-1.6097
CLN8	-0.200938	6.74118	-3.87927	0.00207497	0.0136882	-1.61471
FBXO8	-1.92743	8.43185	-3.87777	0.00208071	0.0137158	-1.61748
RAB9A	-0.961133	7.0573	-3.8776	0.00208135	0.0137158	-1.61779
ACTR6	-1.18291	7.02918	-3.87672	0.00208473	0.0137285	-1.61941
TCF25	0.981534	8.86038	3.87652	0.0020855	0.0137285	-1.61978
HOXA1	0.14822	6.63132	3.87456	0.00209304	0.0137709	-1.6234
RNF112	0.566497	7.36347	3.87392	0.00209553	0.0137749	-1.62459
MEX3C	-0.271587	6.77277	-3.87383	0.00209587	0.0137749	-1.62475
CPED1	0.151257	6.66581	3.87282	0.00209975	0.0137931	-1.6266
RPL35A	-1.48991	8.30239	-3.87052	0.00210869	0.0138446	-1.63086
PRPS1	-0.1917	6.69277	-3.87019	0.00210995	0.0138455	-1.63146
CES1	0.894627	7.73211	3.86917	0.00211394	0.0138644	-1.63335
GSTA1	-0.271893	6.72314	-3.86856	0.0021163	0.0138725	-1.63447
HACD1	-0.76926	6.98111	-3.86826	0.00211749	0.013873	-1.63503
NAV1	1.74157	8.73962	3.86761	0.00212002	0.0138823	-1.63623
SPR	-0.354746	6.7503	-3.86683	0.00212306	0.0138949	-1.63766
RGS22	-2.03552	11.6038	-3.86651	0.00212433	0.0138959	-1.63826
IL36G	-0.481793	6.70854	-3.86494	0.00213049	0.0139288	-1.64116
CTSB	-0.519964	6.94361	-3.86161	0.0021436	0.0139994	-1.64731
CCDC126	-1.07643	9.73864	-3.86139	0.00214447	0.0139994	-1.64771
KIFAP3	-1.5496	8.48945	-3.86134	0.00214467	0.0139994	-1.6478
SRBD1	-0.584376	6.92414	-3.85956	0.00215171	0.0140368	-1.65109
C11orf70	-1.03418	7.09868	-3.85933	0.00215265	0.0140368	-1.65152
GSG2	-0.335912	6.98698	-3.85789	0.00215836	0.0140602	-1.65417
UGT2B28	1.18687	7.44729	3.85786	0.00215849	0.0140602	-1.65424
TMEFF2	-0.41096	6.68791	-3.85701	0.00216186	0.0140748	-1.6558
PDGFB	0.495033	7.23255	3.85632	0.00216463	0.0140854	-1.65708
NOC3L	-0.351576	6.79932	-3.85493	0.00217016	0.014114	-1.65964
CCNL2	-0.723341	8.12045	-3.85028	0.00218886	0.0142281	-1.66823
PTTG1IP	-1.62953	8.86266	-3.84961	0.00219157	0.0142383	-1.66947
ARL6IP6	-0.721272	6.99384	-3.84892	0.00219436	0.014249	-1.67074
PCYOX1	1.93547	9.09848	3.84699	0.00220222	0.0142926	-1.67432
MPZ	0.556628	7.35359	3.84548	0.00220836	0.014325	-1.67711
MS4A7	-0.183982	6.61348	-3.84499	0.00221034	0.0143283	-1.678
KLHL25	1.83317	8.97195	3.84478	0.00221118	0.0143283	-1.67838
ANKS1B	-0.215264	6.71815	-3.84335	0.00221704	0.0143588	-1.68104
FMR1NB	-0.59195	6.92787	-3.84216	0.00222193	0.014383	-1.68324
CTSD	-0.401412	6.75937	-3.84101	0.00222662	0.0144058	-1.68535
TMEM209	-0.676517	6.96299	-3.83838	0.00223746	0.0144685	-1.69021
C19orf12	-0.268521	6.87993	-3.83776	0.00224004	0.0144776	-1.69137
MRPS18A	-0.333116	6.81228	-3.83678	0.00224408	0.0144962	-1.69317
CRYGA	0.646332	7.29924	3.83476	0.00225248	0.0145414	-1.69691
CTU1	0.370939	7.19381	3.83447	0.0022537	0.0145414	-1.69745
TPD52L3	-2.02147	8.59998	-3.83425	0.0022546	0.0145414	-1.69785
LRRC47	-0.511301	7.19293	-3.83348	0.00225779	0.0145481	-1.69927
OMA1	-1.00713	7.44142	-3.83344	0.00225797	0.0145481	-1.69935
LAT2	-0.192603	6.79435	-3.83313	0.00225929	0.014549	-1.69993
ZNF35	-0.577174	7.11975	-3.8247	0.0022947	0.0147695	-1.7155
NAA25	-0.58557	7.11846	-3.82364	0.00229922	0.0147888	-1.71747
IKZF1	0.552528	7.08605	3.82343	0.00230009	0.0147888	-1.71784
SETX	-0.296931	6.95812	-3.82279	0.00230282	0.0147987	-1.71903
AASS	-0.364895	6.84977	-3.82076	0.00231147	0.0148467	-1.72279
CXorf66	-0.283815	6.79674	-3.82029	0.00231349	0.014852	-1.72366
CDK20	-0.756477	6.86094	-3.81881	0.0023198	0.0148848	-1.72639
IPO4	-0.567723	6.89149	-3.81584	0.00233259	0.0149591	-1.73189
USP54	-0.279086	7.00168	-3.81491	0.0023366	0.0149771	-1.73361
SPATS1	-0.678897	7.03687	-3.81387	0.00234111	0.0149983	-1.73553
RAP2B	1.2691	7.84437	3.81323	0.00234385	0.0150081	-1.73671
NRSN2	0.510991	7.34997	3.81234	0.00234772	0.0150252	-1.73836
UBE2D2	1.51722	8.04915	3.81106	0.00235327	0.015053	-1.74072
PATE1	-1.68562	7.77428	-3.80858	0.0023641	0.0151145	-1.74531
A1CF	1.13871	7.3151	3.80753	0.0023687	0.0151361	-1.74726
LCLAT1	1.20041	7.64649	3.80584	0.0023761	0.0151755	-1.75038
PDHA2	-0.905824	7.11598	-3.80129	0.00239616	0.0152958	-1.75879
NEXN	0.547218	7.34118	3.80087	0.00239802	0.0152999	-1.75957
MRPS16	-0.387647	7.06743	-3.80037	0.00240025	0.0153008	-1.7605
TIMP3	-1.04157	7.05741	-3.80029	0.00240063	0.0153008	-1.76066
SAMD14	0.369761	7.1279	3.79961	0.00240363	0.015312	-1.7619
PSMC5	-1.48748	10.1553	-3.79884	0.00240706	0.0153184	-1.76333
LDHAL6B	-0.456173	6.77783	-3.79883	0.00240709	0.0153184	-1.76334
SNAP29	-0.675302	7.06374	-3.79795	0.002411	0.0153309	-1.76497
TRIM52	0.345833	7.13161	3.79784	0.00241153	0.0153309	-1.76519
PDRG1	-1.12586	7.78656	-3.79443	0.00242675	0.0154199	-1.77148
RFC4	-0.67844	7.06374	-3.79364	0.00243033	0.0154347	-1.77295
SPATA5	-0.19846	6.69805	-3.79333	0.00243173	0.0154357	-1.77353
LRRC34	-1.35638	7.27295	-3.79266	0.00243475	0.015447	-1.77477
CCZ1B	-1.0832	7.64816	-3.79206	0.00243743	0.0154561	-1.77587
NT5C2	0.680879	13.9554	3.79152	0.00243986	0.0154636	-1.77687
APMAP	-0.624954	6.94964	-3.78837	0.00245414	0.0155462	-1.78271
ADSS	-0.522975	7.12909	-3.78631	0.00246352	0.0155902	-1.78652
HM13	0.279387	7.10808	3.78606	0.00246463	0.0155902	-1.78697
PSMG3	-0.192628	6.68014	-3.78578	0.00246591	0.0155902	-1.78749
LAGE3	-0.644976	6.99053	-3.78574	0.0024661	0.0155902	-1.78757
SGK223	0.748222	8.13019	3.78481	0.00247036	0.0156092	-1.78929
CCNY	-1.22464	7.66202	-3.78395	0.00247429	0.0156261	-1.79088
DDIT4L	-0.297207	6.8163	-3.78323	0.00247759	0.015639	-1.79222
CCDC42	-2.22913	8.63101	-3.78293	0.00247895	0.0156396	-1.79276
MSANTD2	-0.173699	6.72024	-3.78017	0.00249167	0.015712	-1.79789
RABL3	-0.128181	6.70573	-3.77958	0.00249438	0.0157176	-1.79897
BANK1	-0.197669	6.72055	-3.77908	0.00249671	0.0157176	-1.7999
MXRA8	-0.163499	6.67439	-3.779	0.00249706	0.0157176	-1.80004
PARP9	-0.331218	6.69459	-3.77888	0.00249762	0.0157176	-1.80027
STX18	-0.628737	7.16647	-3.77654	0.00250846	0.0157778	-1.8046
FNDC5	2.01969	9.28564	3.7744	0.00251842	0.0158324	-1.80856
C12orf10	-0.39737	7.03527	-3.77286	0.00252559	0.0158695	-1.81141
KCNN1	0.312838	7.02651	3.7723	0.00252825	0.0158781	-1.81245
PBX2	0.828764	7.44579	3.77175	0.00253082	0.0158835	-1.81347
ZNF410	-0.596977	7.16229	-3.77157	0.00253165	0.0158835	-1.8138
NKX3-1	-2.27457	10.0019	-3.77039	0.00253716	0.0159101	-1.81598
SHKBP1	0.148538	6.86974	3.76957	0.00254106	0.0159264	-1.81751
BTBD16	-0.736592	7.22715	-3.76922	0.00254269	0.0159286	-1.81815
EPB41L1	0.637937	7.22774	3.76848	0.00254619	0.0159425	-1.81953
DCAF4	-0.301522	6.72584	-3.76673	0.00255443	0.0159823	-1.82275
CCL8	1.00758	7.58855	3.76659	0.00255511	0.0159823	-1.82302
SOCS5	-1.57954	10.3422	-3.76614	0.00255722	0.0159874	-1.82385
SPATA31D1	1.55649	10.2061	3.76541	0.00256067	0.016001	-1.8252
TMEM158	-0.406583	6.59191	-3.76504	0.00256247	0.0160042	-1.8259
SCYL3	-0.224188	6.71693	-3.76325	0.00257095	0.0160491	-1.8292
DCAF12	-1.38275	7.6824	-3.76149	0.00257935	0.0160934	-1.83246
PTCD1	0.744699	7.49533	3.75822	0.00259501	0.016183	-1.83851
GSDMD	0.235502	6.96538	3.75651	0.00260324	0.0162195	-1.84168
CATSPERB	-0.618613	7.21205	-3.75647	0.00260347	0.0162195	-1.84177
PTK7	1.80354	8.68678	3.75579	0.00260672	0.0162305	-1.84301
UBAP1	-0.698802	7.20045	-3.75556	0.00260785	0.0162305	-1.84344
IQCH	-0.161073	6.64614	-3.75523	0.00260945	0.0162324	-1.84406
[truncated: 10,436 more rows]

## Sheet: GSE6968
	logFC	AveExpr	t	P.Value	adj.P.Val	B
ARHGAP4	-1.54241	6.7267	-11.0756	7.55484e-07	0.00713393	4.84958
TGFBI	-0.866358	6.2553	-10.93	8.5222e-07	0.00713393	4.78153
RUNX3	-0.754074	6.00179	-7.68169	1.91535e-05	0.106889	2.75745
CACNA2D3	-0.871631	6.36637	-7.36453	2.73544e-05	0.114492	2.49505
TMCO2	-1.52404	11.2073	-6.1741	0.000115759	0.169694	1.37724
CD93	-0.502111	6.0629	-6.14708	0.000119859	0.169694	1.34925
LPXN	-1.2097	6.66236	-6.08614	0.000129692	0.169694	1.28568
RIMBP3C	-2.14754	9.58811	-6.07372	0.000131803	0.169694	1.27264
ADCY3	-0.623781	6.05326	-6.04064	0.000137603	0.169694	1.23779
NCKAP1L	-1.3054	6.54526	-6.02651	0.000140164	0.169694	1.22285
ZFP36	-1.17209	6.55436	-6.02155	0.000141075	0.169694	1.2176
ZHX2	-0.610076	6.26204	-6.01448	0.000142384	0.169694	1.21011
PLA2G16	-1.21056	6.51908	-5.98988	0.000147045	0.169694	1.18397
FAM170A	-0.477693	6.10537	-5.83785	0.000179756	0.169694	1.0201
RLF	-0.393368	5.98799	-5.83148	0.000181288	0.169694	1.01315
TPP1	-1.51811	7.04656	-5.81609	0.000185046	0.169694	0.996326
PTTG2	0.600404	7.07994	5.81442	0.000185459	0.169694	0.994497
CRNDE	-0.372036	5.78465	-5.77511	0.000195472	0.169694	0.951313
ITPKA	-2.20247	8.2488	-5.76651	0.000197739	0.169694	0.941829
ARIH1	-0.264197	5.84992	-5.6862	0.000220325	0.169694	0.852668
C3orf35	-0.372018	5.93733	-5.66702	0.000226122	0.169694	0.831198
UQCRFS1	-0.366144	6.12185	-5.64477	0.000233052	0.169694	0.806218
TNFRSF18	-0.520728	6.28934	-5.58726	0.00025204	0.169694	0.741259
TNFAIP8	-0.288501	5.9182	-5.56845	0.000258607	0.169694	0.719883
YWHAH	-0.53558	6.00997	-5.42905	0.000313401	0.169694	0.559511
NWD1	1.86915	11.606	5.41816	0.000318177	0.169694	0.546841
ADAP2	-0.487072	6.15253	-5.3259	0.00036193	0.169694	0.438616
ALOX5AP	-0.713385	6.21152	-5.26408	0.000394831	0.169694	0.365249
KCNH6	2.26493	10.6983	5.2533	0.000400891	0.169694	0.352382
ZC3H8	-0.752135	6.3402	-5.24577	0.00040518	0.169694	0.343387
NXPE2	1.4128	10.0861	5.23313	0.000412492	0.169694	0.328264
SORCS1	-0.842251	6.47372	-5.21013	0.000426164	0.169694	0.300668
MILR1	0.262529	6.09205	5.20735	0.000427854	0.169694	0.297319
EFCAB5	-0.462109	6.19368	-5.20351	0.000430194	0.169694	0.292698
POLR2I	-1.00572	6.75859	-5.19759	0.000433826	0.169694	0.285576
TF	-0.519065	5.88188	-5.19204	0.000437261	0.169694	0.278892
DAGLB	-0.354019	6.0553	-5.17464	0.00044823	0.169694	0.257886
DMC1	2.49167	9.62784	5.1697	0.000451392	0.169694	0.251922
F2RL3	1.02285	7.45088	5.15917	0.000458224	0.169694	0.239174
MSH3	2.80786	10.0985	5.15617	0.000460192	0.169694	0.235536
FAM83F	-2.96292	9.88677	-5.15583	0.000460411	0.169694	0.235133
TAF1C	-0.925763	6.20234	-5.11222	0.000490046	0.169694	0.182118
FGFBP3	0.552639	6.93281	5.0889	0.000506728	0.169694	0.153624
TRIM58	2.41649	10.0202	5.08478	0.000509738	0.169694	0.148578
IL18	2.30219	10.3619	5.06637	0.000523422	0.169694	0.126002
HTR3E	0.397668	6.53112	5.0519	0.000534452	0.169694	0.108217
ZFP91	-1.2922	7.63756	-5.04663	0.000538529	0.169694	0.101733
CYP7B1	-0.380262	6.00352	-5.04507	0.000539738	0.169694	0.0998185
ACOT12	0.748712	6.49579	5.03039	0.000551311	0.169694	0.0817076
IL4R	-0.639506	5.974	-5.01171	0.00056641	0.169694	0.0586221
SPTBN5	0.469438	6.44301	4.98602	0.000587907	0.169694	0.0267645
VAV2	-0.271569	6.09378	-4.98553	0.000588324	0.169694	0.026157
ZFP62	-0.626974	6.47778	-4.97311	0.000599037	0.169694	0.0107109
B3GALT6	-0.444188	6.07126	-4.95375	0.00061615	0.169694	-0.0134181
DNMT1	-0.338995	6.03203	-4.93945	0.00062912	0.169694	-0.0312761
MRAS	-0.679774	6.47502	-4.93144	0.000636518	0.169694	-0.0413033
TNN	0.529536	6.95659	4.92932	0.00063849	0.169694	-0.0439569
DNAJB1	-0.50026	6.38002	-4.91831	0.000648841	0.169694	-0.0577573
OLAH	2.84547	9.44857	4.89869	0.000667731	0.169694	-0.0824013
FCHO1	0.518473	6.50273	4.89089	0.000675404	0.169694	-0.0922182
METTL25	-0.268605	5.89696	-4.89081	0.000675488	0.169694	-0.0923257
ZMAT3	1.89629	10.9379	4.88716	0.000679114	0.169694	-0.0969271
SEMA3E	2.17289	9.47083	4.88354	0.000682726	0.169694	-0.101487
IL1B	-0.535817	6.05633	-4.87806	0.000688234	0.169694	-0.108395
HECA	-0.286129	5.9779	-4.87736	0.000688941	0.169694	-0.109277
TTF2	2.21225	9.52834	4.87479	0.000691543	0.169694	-0.11252
GAS2L1	-0.337522	6.295	-4.86892	0.00069753	0.169694	-0.119934
NFKBIA	-1.02543	6.24607	-4.8519	0.000715199	0.169694	-0.14146
HLA-C	-0.850292	6.75882	-4.85119	0.000715948	0.169694	-0.142362
ADSL	-1.2442	7.11734	-4.84786	0.000719469	0.169694	-0.146585
BLZF1	1.98942	11.2235	4.83678	0.000731295	0.169694	-0.160627
SMG1	2.54364	10.4644	4.79373	0.000779282	0.169694	-0.215426
SH2B3	-0.21324	5.89062	-4.78109	0.000794006	0.169694	-0.231584
FBXL22	3.20672	10.95	4.75874	0.00082076	0.169694	-0.260213
ATF4	0.473596	6.33711	4.75674	0.000823199	0.169694	-0.262778
HAUS2	1.82519	9.08402	4.75425	0.000826252	0.169694	-0.265977
ECEL1	-0.800995	6.68126	-4.74858	0.000833235	0.169694	-0.273254
PGAM2	-0.920471	6.62862	-4.74711	0.000835056	0.169694	-0.275142
NLRP4	-0.44492	6.063	-4.74239	0.000840939	0.169694	-0.281212
ZNF549	2.11933	9.58169	4.73741	0.000847184	0.169694	-0.287612
EXOSC3	-1.66554	7.24322	-4.73083	0.000855524	0.169694	-0.296088
AIRE	0.692395	12.6443	4.72513	0.000862814	0.169694	-0.303431
CFAP20	-1.26386	7.42151	-4.72393	0.000864359	0.169694	-0.30498
F12	-0.523902	6.13322	-4.71689	0.000873478	0.169694	-0.314065
ATP12A	0.414632	6.28191	4.70245	0.00089249	0.169694	-0.332713
ABCC2	-0.498173	5.86711	-4.70241	0.00089254	0.169694	-0.332761
ZNF14	2.57836	9.47779	4.69828	0.00089806	0.169694	-0.338103
PNPLA8	1.68189	11.296	4.68607	0.000914602	0.169694	-0.353921
FAM160B1	-1.0701	6.74198	-4.67545	0.000929236	0.169694	-0.367685
NPM1	1.82518	7.16583	4.67446	0.000930616	0.169694	-0.368972
EML4	-1.91122	7.40892	-4.67248	0.000933385	0.169694	-0.371549
GPRIN2	-0.888886	6.48526	-4.66359	0.000945886	0.169694	-0.383091
SYAP1	2.21778	10.863	4.65859	0.000953003	0.169694	-0.389596
G0S2	-0.602296	6.19534	-4.65762	0.000954387	0.169694	-0.390856
CD74	-0.780773	6.32928	-4.64171	0.000977446	0.169694	-0.411582
RSPH3	-0.283239	5.95291	-4.63928	0.000981006	0.169694	-0.41474
SLC26A4	1.28853	11.2393	4.63302	0.000990283	0.169694	-0.422915
SLC46A3	0.266898	6.29766	4.6307	0.000993732	0.169694	-0.425936
LRFN2	-0.469995	6.01389	-4.61988	0.00101004	0.169694	-0.440081
EPB41	0.691115	7.10684	4.61755	0.00101358	0.169694	-0.443123
EQTN	-0.880262	6.39586	-4.60897	0.00102677	0.170199	-0.454361
CHSY1	-0.601027	6.06904	-4.58766	0.00106029	0.174032	-0.482307
GNG3	-1.08142	6.78093	-4.57595	0.00107919	0.175416	-0.497691
RAD51B	2.33667	11.7419	4.55922	0.00110683	0.177384	-0.519716
WRN	-1.49875	7.39046	-4.55089	0.00112088	0.177384	-0.53071
ZNF257	-0.186747	5.74096	-4.54959	0.00112309	0.177384	-0.532424
GPR155	2.52461	8.94777	4.52935	0.00115807	0.17985	-0.559171
PCGF3	0.347773	6.26527	4.5265	0.0011631	0.17985	-0.562947
GLRX2	0.526962	7.24683	4.52204	0.001171	0.17985	-0.568855
VPS52	0.319607	6.40769	4.504	0.00120354	0.17985	-0.592775
OVOL2	1.48612	10.9444	4.50338	0.00120468	0.17985	-0.593601
ZNF579	0.613006	6.60161	4.50195	0.0012073	0.17985	-0.595502
DUSP19	2.58718	9.59917	4.48988	0.00122968	0.17985	-0.611545
TMEM151A	0.600157	6.56066	4.48587	0.00123722	0.17985	-0.616881
NLRX1	0.551469	6.61791	4.48487	0.00123912	0.17985	-0.61822
FAM98B	0.986114	13.0405	4.47878	0.00125066	0.17985	-0.626324
METTL21A	2.43067	9.86374	4.465	0.00127722	0.17985	-0.644694
CBR4	1.79268	7.56898	4.46019	0.00128663	0.17985	-0.651115
ZNF384	0.486979	6.46803	4.45618	0.00129455	0.17985	-0.656476
STK38	-1.67564	6.84025	-4.45131	0.00130421	0.17985	-0.662984
TRAF2	-0.68732	6.33177	-4.44771	0.00131141	0.17985	-0.667801
COPS5	-0.665653	6.3207	-4.44291	0.00132108	0.17985	-0.674229
CRIPAK	-0.353382	6.04701	-4.43845	0.00133012	0.17985	-0.680196
OR51B6	-0.184682	5.70422	-4.4375	0.00133206	0.17985	-0.681471
ACAT1	-1.57313	7.08055	-4.4193	0.0013697	0.183452	-0.705866
UBXN1	-0.484343	6.22175	-4.395	0.00142175	0.18497	-0.738549
TEP1	2.61801	9.38576	4.39498	0.00142179	0.18497	-0.738571
CLDN2	-0.50759	6.01446	-4.39265	0.00142689	0.18497	-0.741708
ARSG	2.37123	11.9836	4.39048	0.00143166	0.18497	-0.744633
TMBIM4	2.48434	9.96241	4.38838	0.00143628	0.18497	-0.747457
PSMD14	-0.282851	5.96545	-4.37438	0.00146756	0.187392	-0.766354
STK17A	0.41426	6.62445	4.36908	0.00147957	0.187392	-0.773504
CBLN1	-1.9454	10.0115	-4.3646	0.00148981	0.187392	-0.779556
ZMIZ2	-0.808598	6.34137	-4.35388	0.00151464	0.187392	-0.794067
RAI14	0.26409	6.16749	4.3416	0.00154361	0.187392	-0.810699
FLNA	-1.04378	6.97418	-4.33878	0.00155034	0.187392	-0.814518
LAMTOR1	0.637224	6.85231	4.33789	0.00155247	0.187392	-0.815727
PEX11A	-0.461232	6.31205	-4.33532	0.00155866	0.187392	-0.819221
TACC1	-0.451293	6.15586	-4.33518	0.00155898	0.187392	-0.819404
IFNGR2	-1.47449	7.02562	-4.33186	0.00156701	0.187392	-0.823916
STK33	-0.554809	6.2419	-4.32131	0.00159278	0.188229	-0.838245
RAB24	-0.387355	5.84081	-4.3198	0.0015965	0.188229	-0.840296
ALOX15B	0.295217	6.23413	4.31258	0.00161443	0.189012	-0.850112
PCYT2	-2.12116	9.57936	-4.30039	0.00164519	0.191276	-0.866706
C2orf15	2.82734	9.54705	4.2892	0.00167398	0.192563	-0.881967
WDR82	2.78797	8.36948	4.2836	0.00168859	0.192563	-0.889616
ALPP	2.37603	8.68123	4.28277	0.00169077	0.192563	-0.890747
UBTD2	-1.25074	9.35515	-4.2735	0.00171527	0.194034	-0.903412
MIB1	-0.604136	6.40669	-4.26351	0.0017421	0.194553	-0.917073
GNPNAT1	1.7015	11.3456	4.25856	0.00175556	0.194553	-0.923855
ZBTB47	0.552214	7.0468	4.2483	0.00178382	0.194553	-0.937921
TRIM24	-0.334148	6.01361	-4.24552	0.00179154	0.194553	-0.941725
PPM1A	-1.12678	6.61779	-4.2443	0.00179497	0.194553	-0.943408
ACD	-0.468018	6.63957	-4.23841	0.0018115	0.194553	-0.951486
CTC1	-1.09649	7.00216	-4.23808	0.00181243	0.194553	-0.951938
LARS	-0.342822	5.9877	-4.23676	0.00181618	0.194553	-0.953757
NLRP1	0.521468	6.42159	4.23384	0.00182444	0.194553	-0.95776
REG1B	0.234797	6.10051	4.22577	0.00184754	0.195572	-0.968851
GNL3L	2.41222	9.55297	4.22155	0.00185975	0.195572	-0.974655
LECT2	-0.482817	6.03417	-4.21693	0.00187321	0.195572	-0.981015
STAT2	-0.533945	6.16668	-4.21437	0.00188072	0.195572	-0.984545
ZNF136	2.21154	8.60394	4.1982	0.00192884	0.199024	-1.00683
POLR2D	-1.55355	7.13874	-4.19269	0.00194552	0.199024	-1.01443
DNASE1L1	0.259154	6.01767	4.19136	0.00194958	0.199024	-1.01627
RUBCN	-0.815152	6.46433	-4.18534	0.00196804	0.199691	-1.02459
TMEM267	1.6479	11.0749	4.17973	0.00198541	0.20024	-1.03235
KBTBD6	2.22473	12.596	4.16355	0.0020364	0.203624	-1.05474
TXK	-0.223902	5.7712	-4.15801	0.00205416	0.203624	-1.06241
ATOH1	-0.235748	5.73222	-4.15761	0.00205546	0.203624	-1.06297
HSD17B7	1.74877	11.0806	4.14594	0.00209346	0.206169	-1.07916
ANKRD30A	0.313973	5.91791	4.13511	0.0021294	0.207407	-1.0942
ADRB2	0.846568	7.53544	4.13007	0.00214633	0.207407	-1.1012
GABBR1	-0.561022	6.4066	-4.12585	0.00216061	0.207407	-1.10707
MBLAC1	1.54008	10.1062	4.12436	0.0021657	0.207407	-1.10915
RELB	0.285708	6.16558	4.12322	0.00216959	0.207407	-1.11073
ZNF385B	0.304895	6.11779	4.11984	0.00218114	0.207407	-1.11543
SAMM50	-0.263468	5.90089	-4.11567	0.00219552	0.207407	-1.12124
SLC5A6	-1.34144	6.96303	-4.11042	0.00221375	0.207407	-1.12856
RBFOX1	0.267261	5.90767	4.10447	0.00223461	0.207407	-1.13685
TPSAB1	-0.293088	5.82596	-4.09981	0.00225109	0.207407	-1.14336
MIGA1	2.66491	8.3704	4.09862	0.00225532	0.207407	-1.14502
CCDC155	-0.635817	7.03171	-4.09553	0.00226632	0.207407	-1.14933
DGCR6L	-1.85008	9.74272	-4.09532	0.00226708	0.207407	-1.14962
ZNF430	2.41833	9.00636	4.09181	0.00227967	0.207425	-1.15452
UBR4	-0.654046	6.38263	-4.08111	0.00231849	0.208862	-1.16947
NDUFC2	1.68486	9.4189	4.07733	0.00233236	0.208862	-1.17476
NEURL2	-0.331847	5.96384	-4.06973	0.00236055	0.208862	-1.18539
FN3K	0.312391	6.04456	4.06825	0.0023661	0.208862	-1.18748
ELFN2	0.338374	6.62714	4.06761	0.00236849	0.208862	-1.18837
ACTRT1	0.407439	7.00864	4.06712	0.00237031	0.208862	-1.18905
TRIM74	2.16994	9.8864	4.04687	0.00244751	0.21281	-1.21745
NBAS	-0.198216	5.97623	-4.04667	0.0024483	0.21281	-1.21774
ZNF454	2.69821	8.86543	4.04408	0.00245833	0.21281	-1.22136
BTBD6	-2.92197	9.43756	-4.03664	0.00248752	0.21281	-1.23182
OLR1	-0.199458	6.10469	-4.0357	0.00249124	0.21281	-1.23315
POLR3A	-0.415884	6.00123	-4.03566	0.00249138	0.21281	-1.2332
KIRREL3	0.450591	6.43269	4.0298	0.00251462	0.213078	-1.24143
PCNA	-1.25177	7.21576	-4.02815	0.00252122	0.213078	-1.24376
TULP3	0.791802	7.43356	4.02529	0.00253271	0.213078	-1.24779
TNP2	-1.99155	8.90058	-4.01387	0.00257904	0.215891	-1.26387
PSMB10	-1.20667	6.91456	-4.00145	0.00263041	0.218007	-1.28137
RAB41	0.360848	6.58722	4.00091	0.00263267	0.218007	-1.28213
DIP2B	2.22645	9.65832	3.99836	0.00264338	0.218007	-1.28573
PDCL	0.451219	6.56748	3.9886	0.00268474	0.220333	-1.29951
THOC7	-0.276878	5.87493	-3.98547	0.00269815	0.220337	-1.30394
C5orf24	2.60921	8.87162	3.98246	0.00271112	0.220337	-1.3082
OLIG3	0.969056	8.8755	3.97589	0.00273963	0.221515	-1.31749
MRPS15	-1.08351	6.87586	-3.97035	0.00276392	0.221515	-1.32533
DUSP14	-0.510696	6.22929	-3.97004	0.0027653	0.221515	-1.32577
GOLGA2	2.30106	10.9079	3.96028	0.00280868	0.223919	-1.33959
MACC1	0.243076	5.82493	3.95597	0.00282805	0.224394	-1.3457
ASAP3	-0.189903	6.0059	-3.94609	0.00287301	0.22551	-1.35972
PBOV1	2.67709	8.3609	3.94191	0.00289226	0.22551	-1.36565
CRIPT	0.471435	6.60769	3.94068	0.00289791	0.22551	-1.36739
DPAGT1	-0.51048	6.13709	-3.94065	0.00289806	0.22551	-1.36743
FAM217B	1.32189	11.3977	3.93749	0.00291275	0.22551	-1.37193
S100A12	0.283713	6.31409	3.93312	0.00293317	0.22551	-1.37814
TMEM31	-1.63875	9.95592	-3.93243	0.0029364	0.22551	-1.37912
IFI30	-0.414283	6.03257	-3.92449	0.00297393	0.226925	-1.39041
NFYA	-0.667881	6.28955	-3.92281	0.00298194	0.226925	-1.3928
MAP3K14	-0.724814	6.45879	-3.91026	0.00304244	0.230482	-1.41066
FBLL1	-0.191333	5.88016	-3.90639	0.00306134	0.230645	-1.41617
DPH3	-0.524901	6.4815	-3.90067	0.00308952	0.230645	-1.42433
USP3	-0.429214	6.25511	-3.90021	0.00309183	0.230645	-1.42499
EIF4G3	-1.35577	10.7275	-3.89729	0.00310631	0.230645	-1.42915
CHRNA5	1.85407	10.4128	3.89585	0.00311347	0.230645	-1.4312
IZUMO2	-0.547246	6.16003	-3.88863	0.00314978	0.232306	-1.44151
TMEM17	1.71294	9.64103	3.87918	0.00319789	0.233031	-1.45501
REPIN1	-0.395997	6.02278	-3.87289	0.00323036	0.233031	-1.464
HEXB	-0.447658	6.18879	-3.86956	0.00324767	0.233031	-1.46876
ZNF507	-0.269681	5.77021	-3.8688	0.00325167	0.233031	-1.46986
C12orf43	2.18521	7.78697	3.86837	0.00325388	0.233031	-1.47046
FAM219A	-0.956313	6.96997	-3.86771	0.00325736	0.233031	-1.47141
SWSAP1	2.41297	8.98228	3.86605	0.00326604	0.233031	-1.47378
CYP27A1	-0.319562	5.88168	-3.86512	0.00327095	0.233031	-1.47512
SCN11A	2.78709	8.14283	3.8516	0.00334283	0.237142	-1.49448
DUSP15	-0.316955	6.28166	-3.82979	0.0034623	0.238238	-1.52577
CXCR4	-1.214	6.46652	-3.8269	0.00347845	0.238238	-1.52992
HLA-B	-1.30331	6.67245	-3.82414	0.003494	0.238238	-1.53389
TREML1	0.278825	6.2144	3.824	0.00349475	0.238238	-1.53409
HGH1	-0.625525	6.29686	-3.82298	0.00350054	0.238238	-1.53556
SERF1A	0.200391	6.04484	3.82231	0.00350433	0.238238	-1.53652
SRRM2	-0.911449	6.64884	-3.82125	0.00351033	0.238238	-1.53805
NUDT21	-0.634753	6.42636	-3.81655	0.00353703	0.238238	-1.5448
C21orf2	-0.318831	5.98835	-3.81588	0.00354083	0.238238	-1.54576
ATG16L1	0.404141	6.5124	3.8115	0.00356594	0.238238	-1.55206
GEM	-0.274751	5.92226	-3.81135	0.00356683	0.238238	-1.55228
CGB8	0.277583	6.28408	3.81125	0.0035674	0.238238	-1.55243
CTSA	-0.304005	5.85688	-3.80305	0.00361491	0.238238	-1.56422
CLU	-0.997201	6.65067	-3.79972	0.00363444	0.238238	-1.56903
IPO13	-0.64933	6.52228	-3.79748	0.00364762	0.238238	-1.57226
GLRA1	0.215888	6.11788	3.79715	0.00364953	0.238238	-1.57272
ZNF665	2.06175	10.0068	3.79418	0.00366708	0.238238	-1.577
TAF10	-1.07039	8.00936	-3.79109	0.00368544	0.238238	-1.58146
CRISP1	0.222285	5.92792	3.79109	0.00368546	0.238238	-1.58146
XIAP	2.16996	9.73006	3.78936	0.00369581	0.238238	-1.58396
POMT1	-1.26045	7.20907	-3.7883	0.00370215	0.238238	-1.58549
BCL3	0.501298	6.93411	3.78703	0.00370977	0.238238	-1.58733
TOP2A	0.260591	5.85967	3.78613	0.00371515	0.238238	-1.58862
THAP4	-0.425091	6.30654	-3.78485	0.00372285	0.238238	-1.59047
ZNF620	2.20874	7.72159	3.78437	0.00372574	0.238238	-1.59116
TRIM59	-0.614146	6.24007	-3.78332	0.00373207	0.238238	-1.59267
PCSK7	0.257564	6.06862	3.7816	0.00374248	0.238238	-1.59516
WNK4	0.31553	6.36151	3.77012	0.00381266	0.239726	-1.61173
HLA-DPA1	-1.35717	6.51054	-3.76969	0.0038153	0.239726	-1.61235
EXOC1	-0.234004	5.73983	-3.76769	0.00382764	0.239726	-1.61524
SMCP	-1.82912	11.2404	-3.76762	0.00382808	0.239726	-1.61534
KRT38	0.707707	7.38215	3.76286	0.00385771	0.239726	-1.62222
EDC3	0.288909	6.22964	3.7628	0.00385808	0.239726	-1.6223
SPRR2A	0.399594	6.21327	3.76082	0.00387046	0.239726	-1.62516
IFT57	0.717356	6.37792	3.75924	0.0038804	0.239726	-1.62745
TMED4	-0.237886	5.88693	-3.75624	0.0038993	0.240008	-1.63179
C1QB	-0.498883	6.04006	-3.74787	0.00395257	0.242395	-1.6439
EXO5	2.20298	8.57912	3.73949	0.00400664	0.243825	-1.65603
BCL2L12	0.381593	6.8445	3.73235	0.00405339	0.243825	-1.66639
RSPH14	-1.79554	9.17348	-3.73222	0.00405422	0.243825	-1.66658
DLGAP1	0.382987	6.29506	3.72827	0.00408031	0.243825	-1.67231
ZNF786	2.63906	8.70622	3.72572	0.00409721	0.243825	-1.676
ACAD11	-0.49985	5.9409	-3.72458	0.00410485	0.243825	-1.67766
AQP11	-0.454486	6.29806	-3.72316	0.00411434	0.243825	-1.67972
ACTL6B	0.570008	6.41526	3.72308	0.00411485	0.243825	-1.67983
C5orf22	0.47711	6.21325	3.721	0.00412881	0.243825	-1.68286
CDK12	0.682475	7.07714	3.71703	0.00415548	0.243825	-1.68861
GINS1	2.04624	8.86512	3.71475	0.00417096	0.243825	-1.69193
TCEB2	-0.72643	6.54804	-3.7146	0.00417197	0.243825	-1.69215
ANP32B	-1.11141	7.03619	-3.71454	0.00417234	0.243825	-1.69223
RDH8	-0.786976	6.32234	-3.70872	0.00421202	0.243825	-1.70069
ARAP3	-0.20537	5.92285	-3.70499	0.00423764	0.243825	-1.7061
ARPC5L	0.764962	6.60645	3.70423	0.00424287	0.243825	-1.70721
CNTNAP1	-0.48593	6.33548	-3.69887	0.00428003	0.243825	-1.715
DDX25	-0.813796	6.73231	-3.69794	0.00428652	0.243825	-1.71635
CD79B	-0.313951	5.91611	-3.69749	0.00428965	0.243825	-1.71701
PIH1D2	0.279054	6.09729	3.69424	0.00431245	0.243825	-1.72174
SGSM1	0.258405	5.96626	3.69065	0.00433773	0.243825	-1.72697
VANGL1	0.218263	6.11362	3.69034	0.00433991	0.243825	-1.72742
SLC2A8	-1.77149	9.39502	-3.68758	0.00435944	0.243825	-1.73143
TOB2	-0.173967	5.89868	-3.68713	0.00436263	0.243825	-1.73208
KLF6	-0.248505	5.9939	-3.68436	0.00438234	0.243825	-1.73611
LRRFIP1	1.88511	9.28007	3.68413	0.00438398	0.243825	-1.73645
DYNLRB1	1.94014	8.05862	3.67839	0.0044252	0.243825	-1.74481
FEV	0.26802	6.27087	3.67826	0.00442616	0.243825	-1.74501
PAX7	0.642852	7.46251	3.67725	0.00443342	0.243825	-1.74647
DAPP1	2.42298	8.04065	3.66872	0.00449549	0.243825	-1.7589
CD302	0.253808	6.12141	3.66866	0.00449595	0.243825	-1.75899
CREB1	2.60204	8.79955	3.66447	0.00452681	0.243825	-1.76511
FNDC4	-0.849887	7.08682	-3.66431	0.00452797	0.243825	-1.76534
G3BP2	-0.225936	5.71209	-3.66374	0.0045322	0.243825	-1.76617
RAP2B	0.807284	7.33073	3.66217	0.00454381	0.243825	-1.76846
DCAF8L1	-0.194361	5.66192	-3.66138	0.00454964	0.243825	-1.76961
LAT	-0.348184	6.07453	-3.66004	0.00455964	0.243825	-1.77157
ART4	0.369967	6.59231	3.65667	0.00458476	0.243825	-1.77649
XPNPEP1	-0.6161	6.3303	-3.65271	0.00461447	0.243825	-1.78226
SPINK6	-0.231161	5.68876	-3.65242	0.0046167	0.243825	-1.78269
SUV39H2	1.35521	10.9214	3.6524	0.00461682	0.243825	-1.78272
RGL1	-0.650497	6.11239	-3.65198	0.00462002	0.243825	-1.78334
PHLPP1	0.494461	6.3258	3.65093	0.00462795	0.243825	-1.78487
ZNF408	0.246374	6.12529	3.64872	0.00464465	0.243825	-1.78809
STON1	2.01015	8.25137	3.64835	0.00464748	0.243825	-1.78864
FAM76A	0.59044	6.86893	3.64515	0.00467185	0.243825	-1.79332
ZMYM3	-0.319381	6.2298	-3.64355	0.00468406	0.243825	-1.79565
CXXC4	0.300132	6.02432	3.63909	0.00471831	0.243825	-1.80217
LYRM7	2.3157	8.23169	3.63807	0.0047262	0.243825	-1.80366
LAMA3	0.214111	5.97842	3.63679	0.00473606	0.243825	-1.80553
CTNND2	-0.323209	5.96421	-3.6327	0.00476788	0.243825	-1.81152
DBF4	2.05609	10.1874	3.63107	0.00478061	0.243825	-1.81391
PRR14L	0.317677	6.41364	3.63038	0.00478598	0.243825	-1.81491
KTN1	-0.2565	6.01279	-3.63002	0.00478882	0.243825	-1.81544
F2RL2	-0.194762	5.86296	-3.62959	0.00479213	0.243825	-1.81606
USP14	2.14316	8.30258	3.62737	0.00480961	0.243825	-1.81932
ANKLE1	2.43569	8.53271	3.62669	0.00481495	0.243825	-1.82031
FAM57A	-1.31202	7.01622	-3.62597	0.00482058	0.243825	-1.82136
PROCA1	-1.18583	10.2855	-3.61857	0.00487933	0.246054	-1.8322
GBGT1	0.448704	6.29372	3.61673	0.00489407	0.246055	-1.83489
IMPA2	0.384449	6.48814	3.61156	0.00493567	0.247404	-1.84247
FOXE1	0.56635	6.47279	3.60891	0.00495707	0.24762	-1.84634
MBTD1	1.6403	7.46771	3.60738	0.00496955	0.24762	-1.84859
REXO2	-0.619414	6.47456	-3.59666	0.00505761	0.248122	-1.86432
CCDC77	-0.293469	5.80622	-3.59236	0.00509335	0.248122	-1.87062
MRAP2	-0.264256	5.8296	-3.58895	0.00512193	0.248122	-1.87563
DSCAML1	0.562895	6.53944	3.58772	0.00513227	0.248122	-1.87744
ATG101	-0.652582	6.28414	-3.58695	0.00513871	0.248122	-1.87856
IL10	0.288343	6.17298	3.58595	0.00514717	0.248122	-1.88003
DNM2	-0.22814	5.95823	-3.58535	0.00515226	0.248122	-1.88092
TMEM9B	-0.625992	6.45379	-3.5821	0.00517977	0.248122	-1.88569
OLA1	0.427628	6.23883	3.58146	0.0051852	0.248122	-1.88662
ZFP41	0.20589	6.11591	3.58036	0.00519464	0.248122	-1.88825
CEP135	1.4178	13.2723	3.57589	0.00523282	0.248122	-1.89481
CYP4F3	1.74472	8.2281	3.57526	0.00523829	0.248122	-1.89575
CHST10	0.227569	5.90109	3.57468	0.00524328	0.248122	-1.8966
CLEC1B	-0.315099	6.03151	-3.57117	0.0052735	0.248122	-1.90174
TRIM11	-1.02164	7.67031	-3.56971	0.00528623	0.248122	-1.9039
HIST1H2BF	0.157339	5.8206	3.56753	0.00530517	0.248122	-1.90711
VWA1	0.354885	6.52384	3.56567	0.00532139	0.248122	-1.90984
NRG3	0.537552	6.72388	3.56543	0.00532351	0.248122	-1.9102
ARHGEF6	-0.372753	6.16046	-3.56291	0.00534556	0.248122	-1.9139
PTGFR	0.376477	6.04709	3.56156	0.0053574	0.248122	-1.91588
HRASLS5	-0.769932	6.37828	-3.56108	0.00536168	0.248122	-1.9166
MCRS1	0.292318	6.44578	3.56089	0.00536333	0.248122	-1.91687
ZDHHC23	-1.4538	7.65958	-3.55888	0.00538107	0.248122	-1.91983
SETDB2	-0.996529	6.9231	-3.55881	0.00538167	0.248122	-1.91993
SAA4	0.78568	8.19523	3.55204	0.00544188	0.248122	-1.9299
CAAP1	0.184544	5.92308	3.55172	0.00544473	0.248122	-1.93037
NINL	1.10869	6.62049	3.55166	0.00544525	0.248122	-1.93045
POLK	2.37158	7.52748	3.55007	0.00545953	0.248122	-1.9328
CTSD	-0.451887	6.0969	-3.5499	0.00546107	0.248122	-1.93305
ELMO3	-0.257971	6.08775	-3.54803	0.00547789	0.248122	-1.93581
DDX52	-0.21633	5.9412	-3.54778	0.0054801	0.248122	-1.93617
LGALS12	1.14816	7.98205	3.54268	0.00552628	0.248122	-1.94369
CD48	-0.254589	6.05497	-3.54226	0.00553012	0.248122	-1.94431
NELFE	-0.858757	6.66228	-3.54221	0.00553057	0.248122	-1.94438
TBC1D32	1.77923	7.83743	3.54142	0.00553778	0.248122	-1.94555
TRMT12	-1.34025	6.73592	-3.53993	0.00555137	0.248122	-1.94775
ZFP36L2	-0.28129	5.77141	-3.53939	0.00555624	0.248122	-1.94853
PLA2G10	0.883943	7.37255	3.53933	0.00555678	0.248122	-1.94862
NOP58	-0.305054	6.09346	-3.537	0.00557815	0.248122	-1.95206
SASH3	0.246116	6.14659	3.53684	0.00557965	0.248122	-1.9523
PADI1	0.81359	7.49921	3.5345	0.00560117	0.248122	-1.95575
FKBP14	1.7226	9.51435	3.5315	0.00562884	0.248122	-1.96016
2020-09-09	0.919228	8.56843	3.52794	0.00566194	0.248122	-1.96542
HMGA1	0.387846	6.35011	3.5268	0.00567263	0.248122	-1.96711
PDE4C	1.13601	7.33574	3.5208	0.00572894	0.248122	-1.97596
ZNF23	-0.181936	5.8008	-3.51835	0.00575209	0.248122	-1.97957
FGF9	3.06296	8.28129	3.51662	0.00576852	0.248122	-1.98213
SRSF1	-2.05146	7.52655	-3.51595	0.00577486	0.248122	-1.98312
LEP	0.570043	6.37966	3.51475	0.00578633	0.248122	-1.98489
SMIM11A	-1.11977	6.48062	-3.51205	0.00581207	0.248122	-1.98887
SMIM14	1.82964	8.08828	3.51124	0.00581989	0.248122	-1.99008
MAGEB10	1.73799	9.13416	3.51007	0.00583108	0.248122	-1.9918
CCBE1	0.737291	6.65873	3.50747	0.00585616	0.248122	-1.99565
CFAP65	-0.157712	5.7082	-3.50475	0.00588247	0.248122	-1.99966
MKKS	-0.255228	5.73274	-3.50336	0.00589597	0.248122	-2.00172
MAPK4	0.649899	6.89571	3.50314	0.00589814	0.248122	-2.00205
METTL2A	2.19757	7.88544	3.50251	0.00590425	0.248122	-2.00298
SLC25A4	-0.178895	5.70584	-3.5015	0.00591411	0.248122	-2.00447
FIG4	-0.495752	6.34824	-3.50065	0.00592238	0.248122	-2.00573
WASF1	-2.09356	10.0053	-3.50064	0.00592246	0.248122	-2.00574
OPA3	0.710812	7.08527	3.50045	0.00592434	0.248122	-2.00602
CACNA1B	0.291806	5.82244	3.5	0.00592875	0.248122	-2.00669
CYFIP1	-0.395968	6.23353	-3.49926	0.00593599	0.248122	-2.00778
CTDP1	0.199899	5.93587	3.49883	0.00594023	0.248122	-2.00842
TPK1	-0.24637	5.89922	-3.49855	0.00594296	0.248122	-2.00883
C1orf105	-0.436968	6.28388	-3.49528	0.00597509	0.248347	-2.01367
ARG1	0.250011	5.90291	3.49452	0.00598259	0.248347	-2.01479
GPR25	0.242288	6.03327	3.49155	0.00601196	0.248347	-2.01918
CAV1	0.377968	6.65894	3.48902	0.00603708	0.248347	-2.02292
SLC22A2	0.855561	7.30605	3.48864	0.0060409	0.248347	-2.02349
NUBPL	1.51935	10.0986	3.48763	0.00605101	0.248347	-2.02499
LHX3	0.394758	6.50615	3.48685	0.0060588	0.248347	-2.02614
RTP3	0.466605	6.78055	3.48475	0.00607977	0.248347	-2.02924
RRP8	-0.315997	5.87017	-3.48455	0.00608185	0.248347	-2.02955
GDPD5	-1.32962	7.41609	-3.48023	0.00612532	0.24906	-2.03593
HLF	0.175402	5.90502	3.47986	0.00612905	0.24906	-2.03648
SSBP2	0.581445	6.73682	3.47593	0.00616901	0.250076	-2.04231
ECE2	-0.949461	7.08554	-3.47262	0.00620285	0.250439	-2.04721
GOLGA6L9	-0.725731	6.24606	-3.47088	0.00622073	0.250439	-2.04979
KIAA0408	2.11645	7.48411	3.46236	0.00630893	0.250439	-2.06242
DDX39A	-0.61517	6.97245	-3.46109	0.00632212	0.250439	-2.06429
CYP2B6	0.163167	5.85603	3.45867	0.00634752	0.250439	-2.06789
TAS2R1	0.241848	6.05203	3.45853	0.006349	0.250439	-2.0681
ANAPC16	0.551191	6.5175	3.45797	0.00635488	0.250439	-2.06893
INIP	0.846378	12.6448	3.45407	0.00639593	0.250439	-2.0747
FNBP4	-0.36346	6.06441	-3.45356	0.00640133	0.250439	-2.07546
RALGAPA2	0.299725	6.02206	3.45348	0.00640225	0.250439	-2.07559
GMPR	0.390881	6.74073	3.45072	0.00643152	0.250439	-2.07968
PDLIM5	2.03964	10.617	3.44733	0.00646771	0.250439	-2.08471
FKBP10	0.324914	6.30616	3.44658	0.00647574	0.250439	-2.08583
VRK3	-1.48967	9.22932	-3.44565	0.00648572	0.250439	-2.08721
RBM25	-0.456697	6.11271	-3.44514	0.00649113	0.250439	-2.08796
TMEM117	-0.203432	5.88959	-3.44483	0.00649455	0.250439	-2.08843
PRSS21	0.301455	6.28279	3.44418	0.00650144	0.250439	-2.08938
DUSP7	0.13939	5.97737	3.44188	0.00652624	0.250439	-2.0928
LYL1	-1.32364	9.0687	-3.44147	0.00653072	0.250439	-2.09341
CLEC4A	-0.508853	6.11062	-3.44116	0.00653411	0.250439	-2.09388
EVI5	1.63428	7.30608	3.44	0.00654667	0.250439	-2.0956
NUBP2	-1.53051	7.59158	-3.43847	0.00656318	0.250439	-2.09786
LMNB1	-0.353183	5.91735	-3.43649	0.00658476	0.250439	-2.1008
MLYCD	-0.23373	5.88137	-3.43568	0.00659363	0.250439	-2.10201
PPP5C	0.433237	6.69655	3.43519	0.00659893	0.250439	-2.10273
CSAD	1.68149	9.17426	3.43367	0.00661558	0.250439	-2.10499
RAB10	0.199786	6.02072	3.43308	0.00662211	0.250439	-2.10588
SPAM1	0.470253	6.42181	3.43219	0.00663188	0.250439	-2.1072
PTPRM	-0.549183	6.22462	-3.43206	0.00663328	0.250439	-2.10739
PEAK1	-0.770886	6.64208	-3.43151	0.0066393	0.250439	-2.10821
GABRR1	0.343703	6.3094	3.4311	0.00664385	0.250439	-2.10882
ICAM1	0.288938	6.19181	3.42986	0.00665749	0.250439	-2.11066
CCR4	0.292633	6.26058	3.42858	0.0066716	0.250439	-2.11256
PTPN9	0.181917	6.08852	3.42352	0.00672777	0.251983	-2.12008
ZMIZ1	-0.999919	6.5068	-3.42158	0.00674943	0.25223	-2.12297
TNFAIP1	0.565925	6.69463	3.41995	0.00676773	0.252351	-2.1254
CTF1	0.274593	6.22792	3.41681	0.00680301	0.252942	-2.13006
SEMA4D	-0.366712	5.88205	-3.41585	0.00681381	0.252942	-2.13148
NDUFB1	0.734585	6.37504	3.41059	0.00687346	0.25368	-2.13931
HIST1H3J	0.362672	6.30895	3.40705	0.00691401	0.25368	-2.14458
LEPROTL1	-0.676673	6.22533	-3.40176	0.00697487	0.25368	-2.15245
IFI6	-0.781287	6.46944	-3.39935	0.00700284	0.25368	-2.15604
LMNTD2	-0.660598	6.28786	-3.39911	0.0070057	0.25368	-2.15641
ASB16	0.368321	6.39374	3.39785	0.00702034	0.25368	-2.15828
BAIAP3	-0.228682	5.95705	-3.39745	0.00702498	0.25368	-2.15887
SUPT3H	0.309644	6.35994	3.39638	0.00703744	0.25368	-2.16046
CLDN10	-0.205591	5.93893	-3.39444	0.00706015	0.25368	-2.16336
SHISA2	0.317696	6.2482	3.39409	0.0070643	0.25368	-2.16388
ARL3	-0.501843	6.00828	-3.39354	0.00707069	0.25368	-2.16469
KCNJ6	0.197085	6.04515	3.39346	0.00707162	0.25368	-2.16481
NT5M	-0.319611	5.84605	-3.39343	0.00707198	0.25368	-2.16486
DCP1A	0.247202	6.01063	3.39277	0.0070798	0.25368	-2.16585
CYLC2	0.277944	6.05407	3.39266	0.00708104	0.25368	-2.16601
THRA	0.465384	6.3443	3.39182	0.00709091	0.25368	-2.16726
XRCC2	1.7416	9.05236	3.39066	0.00710463	0.25368	-2.16899
2020-09-05	-2.70435	10.738	-3.38952	0.00711809	0.25368	-2.17069
LAMP3	-0.973885	6.64781	-3.38806	0.00713539	0.25368	-2.17287
INTS8	-0.334069	6.15124	-3.38794	0.00713674	0.25368	-2.17304
SNAPC1	2.24044	7.64847	3.38466	0.00717573	0.254526	-2.17793
TOMM34	-0.481375	6.52357	-3.38057	0.00722461	0.254979	-2.18402
AAK1	0.316931	6.09002	3.38007	0.0072306	0.254979	-2.18477
NDUFA13	-2.40846	9.21703	-3.37977	0.0072342	0.254979	-2.18521
INTS7	1.91547	7.75989	3.37189	0.0073296	0.257798	-2.19697
ZNF330	-0.507328	6.38268	-3.36961	0.0073574	0.257961	-2.20037
OR4C13	0.241341	6.10216	3.36829	0.00737353	0.257961	-2.20234
CGB1	0.289607	6.42634	3.36773	0.00738043	0.257961	-2.20318
SPANXN3	0.319313	6.02037	3.36163	0.00745572	0.259771	-2.21229
ASNSD1	0.358919	6.44748	3.35744	0.00750779	0.259771	-2.21854
C10orf82	-0.711226	7.29479	-3.35493	0.00753921	0.259771	-2.22229
CNNM2	1.58142	7.57248	3.35287	0.00756511	0.259771	-2.22537
HELZ2	-0.256324	5.99223	-3.35234	0.00757174	0.259771	-2.22615
LRRC8B	-0.149992	5.68693	-3.35115	0.00758674	0.259771	-2.22793
SLC39A6	-0.225446	5.97617	-3.35092	0.00758974	0.259771	-2.22828
ATP13A3	-0.204985	5.8394	-3.35005	0.00760066	0.259771	-2.22958
MED7	-0.402006	6.08791	-3.34994	0.00760208	0.259771	-2.22974
MTRF1	0.543553	6.47328	3.34964	0.00760581	0.259771	-2.23018
HNRNPU	-1.19798	7.07213	-3.34927	0.00761058	0.259771	-2.23075
ERAP2	1.60606	10.4147	3.34865	0.00761843	0.259771	-2.23167
ADNP	-0.351318	5.99184	-3.34595	0.00765272	0.26041	-2.2357
NOMO2	-1.25341	7.34264	-3.34283	0.00769255	0.260858	-2.24037
ACBD3	-0.159828	5.95233	-3.34247	0.0076971	0.260858	-2.2409
CACNG2	0.73632	6.36395	3.34024	0.00772579	0.260858	-2.24424
CD1C	0.618644	6.76583	3.34005	0.00772822	0.260858	-2.24452
ULK4	-0.395419	6.38623	-3.33581	0.00778296	0.261207	-2.25086
TGOLN2	-0.223918	5.96124	-3.33574	0.00778389	0.261207	-2.25096
ANP32A	0.252475	6.26042	3.33327	0.00781597	0.261207	-2.25466
ASGR1	-1.58615	9.76075	-3.33271	0.00782329	0.261207	-2.2555
SLC9A8	0.519387	6.90282	3.33215	0.00783058	0.261207	-2.25634
C11orf40	0.72374	6.97077	3.33203	0.00783217	0.261207	-2.25652
SEMA3B	-0.770591	6.56161	-3.32781	0.00788733	0.262524	-2.26282
TXNL4A	0.436039	6.42334	3.32627	0.00790771	0.26268	-2.26514
ASB2	0.292754	6.13956	3.31879	0.00800685	0.265447	-2.27632
MX1	-0.379981	6.23796	-3.31668	0.00803498	0.265853	-2.27947
HRG	-0.228784	5.9814	-3.31057	0.00811735	0.268049	-2.28863
TEPSIN	-0.923522	6.86869	-3.30738	0.00816065	0.268851	-2.29341
NAP1L4	-1.84731	7.81473	-3.30641	0.00817375	0.268851	-2.29485
TUBD1	0.289988	6.15568	3.29756	0.00829534	0.271914	-2.30811
PHACTR1	-0.350134	6.01758	-3.29653	0.00830972	0.271914	-2.30967
LMAN1	0.192434	6.00181	3.29502	0.00833055	0.271914	-2.31192
POLH	1.91795	8.14094	3.29493	0.00833185	0.271914	-2.31206
BCL6	-0.246741	5.97324	-3.29271	0.00836277	0.272392	-2.31538
PLCG1	-1.01694	6.84873	-3.28705	0.00844221	0.273978	-2.32388
TOP1	0.191969	6.06626	3.28691	0.00844419	0.273978	-2.32409
UNC50	-1.23024	7.43691	-3.2822	0.00851084	0.275606	-2.33115
FCRL5	0.196141	5.98135	3.27884	0.00855872	0.275676	-2.33619
TUBGCP4	1.36325	10.6988	3.27826	0.00856695	0.275676	-2.33705
C15orf41	0.223914	6.06173	3.27734	0.00858015	0.275676	-2.33843
TTC36	0.191287	5.92351	3.27552	0.00860636	0.275676	-2.34117
ZNF26	-0.189273	5.86094	-3.27549	0.0086068	0.275676	-2.34122
ZNF576	0.293177	6.37154	3.2745	0.00862093	0.275676	-2.34269
GABRE	0.229376	6.13843	3.274	0.00862826	0.275676	-2.34346
B3GAT1	0.221122	5.88859	3.27145	0.00866509	0.275741	-2.34728
UTP4	-0.173614	5.94782	-3.27079	0.00867462	0.275741	-2.34827
RTBDN	0.331939	6.26634	3.27044	0.00867968	0.275741	-2.34879
IRAK2	0.525399	6.70569	3.26708	0.0087285	0.276605	-2.35383
MYO9B	-0.274783	5.77083	-3.2663	0.00873994	0.276605	-2.35501
DNAI1	-0.557407	6.49002	-3.26324	0.00878474	0.277498	-2.3596
DDIT4	-0.20181	5.91305	-3.2555	0.00889911	0.279714	-2.37122
SLC8A1	-0.784815	6.50408	-3.25546	0.0088997	0.279714	-2.37128
TBX10	0.37034	6.78174	3.25361	0.00892737	0.279714	-2.37407
OGFR	0.384052	6.4313	3.25311	0.00893484	0.279714	-2.37482
MTMR9	0.325578	6.22348	3.25287	0.00893843	0.279714	-2.37518
JUP	-0.250021	6.07897	-3.24976	0.00898503	0.279993	-2.37985
HDHD3	0.231293	6.51524	3.24876	0.00900008	0.279993	-2.38136
NEBL	-0.189203	5.7585	-3.24653	0.00903359	0.279993	-2.38469
GNAI2	-1.47881	9.43204	-3.24592	0.00904281	0.279993	-2.38561
RAD18	0.234149	6.09629	3.24533	0.00905174	0.279993	-2.3865
TBC1D21	-1.5074	8.57384	-3.24454	0.00906379	0.279993	-2.38769
COPG1	0.26624	6.12846	3.24446	0.00906506	0.279993	-2.38782
USP30	-0.667847	6.47072	-3.2434	0.00908113	0.279993	-2.38941
BPIFB1	-0.380597	5.96938	-3.23772	0.00916779	0.280927	-2.39794
AZIN2	-1.75665	10.8232	-3.23713	0.00917691	0.280927	-2.39884
KLK14	0.21878	5.95582	3.23707	0.00917772	0.280927	-2.39891
LIPJ	-0.277883	6.10395	-3.23702	0.00917852	0.280927	-2.39899
FOXN2	-0.327423	6.07618	-3.23546	0.00920255	0.281148	-2.40134
HOXA10	0.324434	6.30125	3.23165	0.00926143	0.282431	-2.40707
RASSF7	-0.662593	7.14337	-3.22891	0.00930396	0.283212	-2.41119
MEIS1	-0.728331	6.36396	-3.22754	0.00932533	0.283348	-2.41325
ZNF440	1.884	8.0636	3.22568	0.00935442	0.283717	-2.41605
HLA-DMB	-0.693934	6.25114	-3.22204	0.00941174	0.28459	-2.42153
UCN3	0.274836	6.20685	3.22169	0.00941722	0.28459	-2.42206
CYCS	0.368728	6.15258	3.21896	0.00946041	0.284874	-2.42617
KLHL5	0.283239	6.39414	3.21892	0.009461	0.284874	-2.42622
STXBP4	1.8157	8.07015	3.21771	0.00948021	0.284874	-2.42805
SEC61A2	-0.424814	6.38516	-3.2168	0.00949468	0.284874	-2.42942
CNIH2	-0.676363	6.57663	-3.21497	0.00952383	0.285238	-2.43217
RBMX2	0.452416	7.11521	3.20906	0.00961853	0.28756	-2.44106
ROBO2	-0.183718	5.82076	-3.20796	0.00963637	0.287579	-2.44272
CES4A	0.449346	6.68124	3.20652	0.00965961	0.28761	-2.44489
PIH1D3	1.6262	13.1754	3.20577	0.00967174	0.28761	-2.44602
ARFGAP1	-0.263063	6.04291	-3.20411	0.00969871	0.287841	-2.44852
OR2D3	0.375574	6.19628	3.20318	0.00971389	0.287841	-2.44992
C16orf72	-0.234512	5.99008	-3.20154	0.00974065	0.288124	-2.4524
CACNA1D	0.607009	6.99849	3.20038	0.00975957	0.288174	-2.45414
CARS2	-1.85171	8.18567	-3.19611	0.00982967	0.289733	-2.46057
DGAT1	-0.576688	6.5603	-3.19345	0.00987363	0.290517	-2.46458
PCDHA5	-0.145148	5.76587	-3.1906	0.00992097	0.290935	-2.46888
PARM1	0.530272	7.02979	3.1905	0.00992258	0.290935	-2.46902
GGACT	-0.854952	6.67955	-3.18919	0.0099445	0.291068	-2.471
SEMA3F	0.358968	6.73614	3.18784	0.00996697	0.291216	-2.47303
CCDC7	-1.33789	8.53068	-3.18452	0.0100227	0.291752	-2.47804
SLC5A8	1.61334	8.10081	3.18257	0.0100554	0.291752	-2.48097
HOMEZ	-1.36751	6.83095	-3.1824	0.0100584	0.291752	-2.48124
SOD2	-0.9573	6.67997	-3.18147	0.010074	0.291752	-2.48263
B4GALNT1	0.332028	6.15452	3.17906	0.0101149	0.291752	-2.48627
SETD9	-0.652008	6.51266	-3.17904	0.0101153	0.291752	-2.4863
CR1	0.265342	6.05369	3.17816	0.0101303	0.291752	-2.48763
CTSF	-1.50018	7.45075	-3.17713	0.0101477	0.291752	-2.48918
FAIM	-0.185766	5.87371	-3.17678	0.0101537	0.291752	-2.48971
MEPCE	-0.84698	6.83906	-3.17643	0.0101596	0.291752	-2.49023
TBCE	-0.22622	6.12251	-3.16948	0.0102789	0.294308	-2.50072
NECAB1	0.181437	5.87903	3.16834	0.0102985	0.294308	-2.50243
SNRPB2	0.346416	6.71961	3.16617	0.0103361	0.294308	-2.5057
SRSF12	-0.437067	5.94118	-3.16571	0.0103442	0.294308	-2.50641
CDC37L1	-0.867487	6.66773	-3.16447	0.0103656	0.294308	-2.50827
KLK2	0.188277	5.98098	3.16388	0.010376	0.294308	-2.50916
ATP6V1B2	-0.316883	6.2913	-3.16362	0.0103805	0.294308	-2.50955
IL1R2	0.652745	7.40273	3.16312	0.0103892	0.294308	-2.51031
IL7	-0.342557	6.10309	-3.16099	0.0104264	0.294862	-2.51352
TP63	-0.17502	5.75055	-3.15768	0.0104846	0.295987	-2.51852
GAL	-0.204935	5.91178	-3.15672	0.0105015	0.295987	-2.51997
LOC389199	-0.21511	5.9206	-3.15328	0.0105624	0.296261	-2.52516
ANKMY2	-0.361891	6.08847	-3.15286	0.0105698	0.296261	-2.52579
PRNP	-0.303188	6.03021	-3.15248	0.0105766	0.296261	-2.52637
OSBP2	-1.73806	9.22397	-3.15212	0.010583	0.296261	-2.52691
FER	-0.479219	6.39157	-3.15118	0.0105997	0.296261	-2.52833
MAS1	0.860213	7.62975	3.14669	0.01068	0.297488	-2.53511
CNKSR1	0.681111	6.76457	3.14628	0.0106874	0.297488	-2.53573
LYZL1	-1.12401	6.80742	-3.14428	0.0107232	0.297488	-2.53874
PLBD2	-2.22547	8.28307	-3.1421	0.0107627	0.297488	-2.54204
RGPD4	1.63689	9.43508	3.14183	0.0107676	0.297488	-2.54245
BSCL2	-1.03224	9.16721	-3.1406	0.0107898	0.297488	-2.5443
COX5A	-0.536547	6.42932	-3.14007	0.0107995	0.297488	-2.54511
DKK1	0.220131	5.88845	3.13894	0.0108199	0.297488	-2.5468
TDRD9	0.547308	7.07767	3.13841	0.0108296	0.297488	-2.54761
AP1S2	-0.762923	6.19917	-3.13737	0.0108487	0.297488	-2.54919
ZNF667	1.59874	9.12884	3.13687	0.0108576	0.297488	-2.54993
FAM219B	0.244212	6.0423	3.13636	0.010867	0.297488	-2.55071
DHX33	0.24871	6.05136	3.13467	0.0108979	0.297488	-2.55325
GLT1D1	-2.57176	9.89907	-3.13461	0.010899	0.297488	-2.55335
CLIP3	0.210421	6.06055	3.13293	0.0109298	0.297488	-2.55589
RTN4IP1	0.15018	5.98412	3.13172	0.010952	0.297488	-2.55771
CLHC1	-0.813124	6.48311	-3.13125	0.0109608	0.297488	-2.55843
WDR33	0.202322	5.87189	3.1311	0.0109635	0.297488	-2.55865
TLR4	0.171638	5.75164	3.13002	0.0109835	0.297551	-2.56029
SEC31B	-0.478374	6.15209	-3.12798	0.0110212	0.29781	-2.56336
NOX1	0.281628	6.6712	3.12672	0.0110446	0.29781	-2.56527
GPX2	-0.210485	5.97635	-3.12662	0.0110465	0.29781	-2.56542
BLMH	-0.719066	6.44266	-3.12278	0.011118	0.299059	-2.57122
DNHD1	-0.878579	7.18614	-3.12222	0.0111285	0.299059	-2.57207
MSRB2	1.02714	6.62864	3.12123	0.011147	0.299076	-2.57357
CUTA	-1.20944	8.48568	-3.1171	0.0112248	0.299832	-2.57981
SPATA8	-0.810001	7.18702	-3.11497	0.0112651	0.299832	-2.58303
KYNU	-0.665581	6.57368	-3.11448	0.0112744	0.299832	-2.58378
CCDC121	0.18793	5.93018	3.11447	0.0112746	0.299832	-2.58379
NEUROG3	0.311479	6.44373	3.112	0.0113215	0.299832	-2.58752
NDUFA1	-0.183905	5.85924	-3.11164	0.0113284	0.299832	-2.58807
PLOD2	0.200353	5.97963	3.1098	0.0113636	0.299832	-2.59085
MAPK1IP1L	0.142062	5.87207	3.10973	0.0113649	0.299832	-2.59096
TMEM132A	0.280529	6.35051	3.10964	0.0113666	0.299832	-2.59109
ZNRF4	-0.716237	6.64277	-3.10841	0.0113902	0.299832	-2.59295
PANK1	0.261737	6.16123	3.1055	0.0114462	0.299832	-2.59736
OSBPL3	0.379376	6.33897	3.10481	0.0114594	0.299832	-2.59839
NEK8	0.83301	6.64824	3.10408	0.0114734	0.299832	-2.59949
LLPH	1.37002	9.61908	3.10258	0.0115025	0.299832	-2.60177
MRFAP1	-1.99374	7.84391	-3.10247	0.0115046	0.299832	-2.60193
KLHL28	1.5148	9.81271	3.10207	0.0115124	0.299832	-2.60254
TNFSF15	2.17291	7.62322	3.10172	0.0115191	0.299832	-2.60307
CSRNP3	0.322455	6.3722	3.09989	0.0115548	0.299832	-2.60584
CDAN1	0.191721	5.92747	3.09973	0.0115579	0.299832	-2.60608
GBA	-0.222196	5.81755	-3.09873	0.0115773	0.299832	-2.60759
MICAL2	0.225453	6.04338	3.09861	0.0115796	0.299832	-2.60777
ZFAND6	-0.540986	6.21953	-3.09809	0.0115898	0.299832	-2.60856
PFN2	-1.4501	6.92485	-3.09713	0.0116086	0.299832	-2.61001
ZCCHC13	-0.183767	5.86744	-3.09678	0.0116154	0.299832	-2.61054
FAM120C	0.138112	5.95372	3.0964	0.0116229	0.299832	-2.61112
EGR1	-0.882727	6.146	-3.09527	0.0116449	0.299938	-2.61282
PLBD1	-0.288441	6.06648	-3.09317	0.0116863	0.30054	-2.61601
MARK3	-0.272805	6.04497	-3.08615	0.0118252	0.30221	-2.62663
TNFSF12-TNFSF13	0.386434	6.7459	3.08472	0.0118537	0.30221	-2.62878
TYMP	-0.976519	6.97301	-3.08472	0.0118537	0.30221	-2.62879
NDUFS5	-0.461123	6.09522	-3.08356	0.0118769	0.30221	-2.63054
AARS2	-0.247807	5.86275	-3.08256	0.011897	0.30221	-2.63206
IFNA6	0.205391	5.86283	3.08255	0.0118972	0.30221	-2.63208
CYB561D1	0.645519	7.31973	3.08242	0.0118998	0.30221	-2.63227
TMEM19	1.19351	10.5353	3.08232	0.0119017	0.30221	-2.63242
PRR11	0.955712	6.90973	3.08107	0.0119269	0.30221	-2.63431
TTC25	-0.35783	6.21845	-3.08083	0.0119317	0.30221	-2.63468
ARHGAP15	-0.421997	6.17797	-3.07841	0.0119805	0.302435	-2.63835
CES3	-0.21423	5.78901	-3.07774	0.011994	0.302435	-2.63936
BAG3	-0.917886	6.70064	-3.0777	0.0119948	0.302435	-2.63941
SRD5A3	1.08337	6.66768	3.07441	0.0120615	0.303234	-2.6444
HEATR3	0.547488	6.26051	3.07382	0.0120734	0.303234	-2.64529
RP1	-0.158632	5.72179	-3.07239	0.0121025	0.303234	-2.64745
MICU2	-0.257035	5.76716	-3.06957	0.0121602	0.303234	-2.65172
MARS	-0.572702	6.89858	-3.06819	0.0121886	0.303234	-2.65382
C3orf38	-0.385323	6.18106	-3.06797	0.0121931	0.303234	-2.65415
SMAD4	0.175359	5.88865	3.06631	0.0122273	0.303234	-2.65666
KIAA2013	-0.688326	6.63592	-3.06583	0.0122372	0.303234	-2.65739
ZCRB1	0.266142	6.01512	3.06502	0.012254	0.303234	-2.65862
MTG2	0.150298	5.8174	3.06478	0.0122588	0.303234	-2.65898
IL1RAPL1	0.215377	6.04608	3.06472	0.01226	0.303234	-2.65906
C9orf135	-0.332752	6.05376	-3.06268	0.0123023	0.303234	-2.66215
SIRPD	0.224014	5.97491	3.06223	0.0123116	0.303234	-2.66283
ME2	-0.406068	6.26689	-3.0622	0.0123123	0.303234	-2.66289
MED26	-0.28512	6.14675	-3.06038	0.0123501	0.303234	-2.66564
PRPF38B	-0.156397	5.74588	-3.06026	0.0123526	0.303234	-2.66582
CHD1	0.193974	6.47284	3.06025	0.0123528	0.303234	-2.66583
CACNA1H	-0.392991	6.47737	-3.05929	0.0123729	0.303234	-2.6673
SYT15	-0.141438	5.59775	-3.05862	0.0123868	0.303234	-2.6683
ZNF345	0.3722	6.24064	3.05796	0.0124006	0.303234	-2.6693
ATP5J	-0.643358	6.68974	-3.05766	0.0124069	0.303234	-2.66976
LZTS2	0.273274	6.26285	3.05413	0.0124811	0.304604	-2.67512
RNF31	-0.17163	6.01369	-3.05317	0.0125012	0.304651	-2.67656
CD209	-0.418921	6.11807	-3.05122	0.0125424	0.304842	-2.67951
TDP2	-0.145006	5.77997	-3.05108	0.0125455	0.304842	-2.67974
ARID5B	0.360403	6.46195	3.04786	0.0126137	0.305998	-2.68461
COA1	1.89598	7.3386	3.04538	0.0126666	0.305998	-2.68837
LANCL1	-0.759412	6.48087	-3.04439	0.0126877	0.305998	-2.68986
VPS41	1.69909	7.91132	3.04287	0.0127204	0.305998	-2.69217
ANKRD44	1.23488	10.8677	3.04236	0.0127313	0.305998	-2.69294
PHACTR2	0.200651	6.11397	3.04188	0.0127415	0.305998	-2.69366
VWA8	0.505983	6.62218	3.04044	0.0127726	0.305998	-2.69585
ACSBG2	-1.16121	12.3246	-3.04003	0.0127815	0.305998	-2.69648
HNRNPC	-0.944326	7.67267	-3.03953	0.0127922	0.305998	-2.69723
PECAM1	-0.334468	6.07293	-3.03832	0.0128185	0.305998	-2.69907
C14orf2	0.20964	6.12685	3.03776	0.0128305	0.305998	-2.69991
WAS	-0.45068	6.19375	-3.03678	0.0128517	0.305998	-2.7014
PCDHB9	1.53918	7.59344	3.0364	0.0128601	0.305998	-2.70198
OR51A2	-0.217177	5.91449	-3.03604	0.0128677	0.305998	-2.70252
IVNS1ABP	-0.189615	5.99608	-3.035	0.0128903	0.305998	-2.70409
ZNF652	0.786476	12.733	3.03481	0.0128946	0.305998	-2.70439
CCDC53	-0.744546	7.03347	-3.03439	0.0129038	0.305998	-2.70503
YWHAB	-0.225372	5.7488	-3.03351	0.012923	0.306011	-2.70636
GSC2	-0.159606	5.76858	-3.03269	0.0129408	0.306011	-2.7076
COG1	0.636176	6.80958	3.02903	0.0130209	0.30747	-2.71315
MYOCD	0.167181	5.95499	3.02568	0.0130948	0.307679	-2.71822
IL5RA	-0.193546	5.7957	-3.02518	0.0131058	0.307679	-2.71898
SCLY	-0.491836	6.16362	-3.0249	0.013112	0.307679	-2.71941
FRG1	-0.44395	6.38251	-3.02457	0.0131194	0.307679	-2.71991
DAND5	0.167682	5.90571	3.02248	0.0131658	0.307679	-2.72308
DRAM1	0.661928	7.28289	3.02196	0.0131774	0.307679	-2.72388
CNGB1	0.173598	5.97711	3.02168	0.0131835	0.307679	-2.72429
C11orf1	2.2719	7.54403	3.02162	0.013185	0.307679	-2.72439
DHX32	-0.456315	6.15532	-3.02097	0.0131993	0.307679	-2.72536
SRPRA	0.274898	6.5285	3.01817	0.0132619	0.307679	-2.72961
GALNT3	1.96593	7.68254	3.01799	0.0132659	0.307679	-2.72989
FRMD5	0.309215	5.92619	3.01757	0.0132755	0.307679	-2.73053
HPCA	-0.812028	6.95436	-3.017	0.0132882	0.307679	-2.73139
KATNA1	-1.31104	7.4402	-3.01668	0.0132954	0.307679	-2.73188
PHF19	0.189872	5.96095	3.01623	0.0133054	0.307679	-2.73256
MAP4K3	-0.397787	6.09374	-3.01314	0.013375	0.308563	-2.73724
FBXO8	0.364316	6.09738	3.0129	0.0133805	0.308563	-2.73761
BCLAF1	-0.22694	5.99894	-3.01106	0.0134221	0.308653	-2.74039
C10orf90	-0.224445	6.04605	-3.01029	0.0134396	0.308653	-2.74156
CT83	0.303516	6.11013	3.00961	0.0134551	0.308653	-2.7426
APOPT1	1.30014	7.09803	3.00903	0.0134682	0.308653	-2.74348
PODN	0.632653	6.55174	3.00786	0.0134949	0.308653	-2.74525
UBE2R2	-2.70273	9.60536	-3.00625	0.0135317	0.308653	-2.7477
KMO	-1.25923	6.80202	-3.00566	0.0135453	0.308653	-2.7486
ZFAT	0.212374	6.12117	3.00547	0.0135496	0.308653	-2.74888
LPCAT3	0.192422	6.31596	3.00543	0.0135504	0.308653	-2.74894
C3orf14	0.611936	7.1209	3.00456	0.0135705	0.308691	-2.75027
BAZ2B	-0.26115	5.94379	-3.00174	0.0136351	0.30974	-2.75453
IL4I1	-0.314342	6.1846	-2.99551	0.0137795	0.312043	-2.76399
LRRN3	0.727903	6.24103	2.99486	0.0137945	0.312043	-2.76497
NAT6	-0.953281	7.05242	-2.9947	0.0137984	0.312043	-2.76522
ADCK5	-0.195397	5.86947	-2.99398	0.0138151	0.312043	-2.76631
HCFC2	-0.661894	6.23146	-2.99336	0.0138296	0.312043	-2.76725
SV2B	0.288835	5.8984	2.98888	0.0139347	0.31368	-2.77405
COL5A3	0.370376	6.27329	2.98867	0.0139397	0.31368	-2.77437
CPXM2	-0.298594	6.03483	-2.98697	0.0139798	0.314161	-2.77695
TCF15	0.212565	6.05429	2.98595	0.014004	0.314283	-2.7785
ATOH8	-1.8038	8.57818	-2.98423	0.0140446	0.314408	-2.7811
SOX12	-0.251679	5.83981	-2.98413	0.0140471	0.314408	-2.78126
FAAP20	0.212382	6.20831	2.98173	0.0141041	0.315262	-2.7849
NASP	2.29824	7.44858	2.9795	0.0141574	0.315376	-2.78828
PVR	-0.229745	5.75112	-2.97873	0.0141758	0.315376	-2.78945
USF2	0.31934	6.16099	2.97785	0.0141971	0.315376	-2.7908
TTC27	-0.149405	5.86905	-2.97726	0.0142112	0.315376	-2.79169
SARAF	-1.69108	8.07811	-2.97661	0.0142268	0.315376	-2.79267
KRTAP4-5	-0.772116	6.45128	-2.97605	0.0142403	0.315376	-2.79352
DHDDS	-1.83057	13.4424	-2.97602	0.0142411	0.315376	-2.79358
HSD11B1L	-1.5007	7.63792	-2.97417	0.0142857	0.315946	-2.79638
APOBEC3F	1.12378	6.75688	2.97014	0.0143834	0.317312	-2.8025
NGEF	0.200922	5.91063	2.96972	0.0143936	0.317312	-2.80314
TSNARE1	-1.10289	6.64184	-2.96884	0.014415	0.317312	-2.80447
ROPN1	-0.956283	6.93314	-2.96808	0.0144336	0.317312	-2.80563
PNPLA4	0.297504	6.35828	2.96772	0.0144422	0.317312	-2.80617
CYTH4	-0.562804	6.27673	-2.96681	0.0144647	0.317389	-2.80756
MSRB3	0.876062	12.0311	2.96571	0.0144916	0.317564	-2.80923
ZNF200	-1.58842	7.73481	-2.96341	0.014548	0.318382	-2.81271
TMEM133	0.193361	6.02613	2.9626	0.014568	0.318403	-2.81395
SULT1A1	1.66943	8.53141	2.95993	0.0146339	0.318477	-2.818
TMEM237	-0.255137	6.12333	-2.95985	0.0146359	0.318477	-2.81812
DIP2C	0.303992	5.93953	2.95843	0.014671	0.318477	-2.82027
MPLKIP	-0.840648	6.96327	-2.95681	0.0147114	0.318477	-2.82274
GNL2	-0.571269	6.35044	-2.95642	0.014721	0.318477	-2.82333
OVOL1	-1.44649	7.52995	-2.95351	0.0147937	0.318477	-2.82775
MRTO4	1.57952	10.4314	2.95177	0.0148375	0.318477	-2.8304
CCHCR1	-0.613191	6.39828	-2.95138	0.0148472	0.318477	-2.83099
AIP	0.704111	7.4502	2.9512	0.0148517	0.318477	-2.83126
CPNE9	0.239565	6.09818	2.95094	0.0148583	0.318477	-2.83166
TSPAN12	0.227909	6.03596	2.95061	0.0148665	0.318477	-2.83215
ASB14	0.160717	5.84225	2.95059	0.014867	0.318477	-2.83219
PELI1	-0.139692	5.88248	-2.95043	0.0148711	0.318477	-2.83243
RAPGEF6	0.400814	6.29487	2.95016	0.0148778	0.318477	-2.83284
SBF1	-0.444689	6.43949	-2.94786	0.0149357	0.318477	-2.83632
SH3BGR	-0.983631	6.8097	-2.94342	0.0150484	0.318477	-2.84307
PLPPR2	0.53464	6.54603	2.94241	0.0150744	0.318477	-2.84462
HP	-0.162462	5.87391	-2.94187	0.015088	0.318477	-2.84543
FAM200A	1.80996	9.24175	2.9418	0.0150898	0.318477	-2.84553
ZC3HAV1L	-0.260391	5.79783	-2.94086	0.0151138	0.318477	-2.84696
HAGHL	-0.93728	7.04706	-2.94052	0.0151226	0.318477	-2.84748
SARNP	-1.25192	7.45505	-2.94043	0.0151249	0.318477	-2.84762
B2M	-0.965208	6.56024	-2.94015	0.0151321	0.318477	-2.84805
ARHGEF3	-0.210999	5.85808	-2.9393	0.0151539	0.318477	-2.84934
MCCC1	-0.185144	5.80157	-2.93872	0.0151687	0.318477	-2.85021
LIN37	0.178059	6.02229	2.93777	0.0151931	0.318477	-2.85166
SUGP2	-1.35622	7.55953	-2.93758	0.0151979	0.318477	-2.85194
JAML	-0.725537	6.20106	-2.93713	0.0152095	0.318477	-2.85262
GID8	-0.178697	5.96215	-2.93649	0.015226	0.318477	-2.8536
TLX3	-0.152429	5.72366	-2.93609	0.0152364	0.318477	-2.85421
TMIGD2	0.153189	5.96489	2.9354	0.0152542	0.318477	-2.85526
BPI	-0.36352	6.37862	-2.93422	0.0152846	0.318477	-2.85705
CNOT7	-0.571887	6.30205	-2.93416	0.0152863	0.318477	-2.85715
RNF19A	-1.28712	7.52421	-2.93362	0.0153003	0.318477	-2.85796
KCNH4	0.455913	6.95781	2.93359	0.0153009	0.318477	-2.858
DCST1	-0.778409	6.83931	-2.93345	0.0153046	0.318477	-2.85822
ANKEF1	-0.577418	6.23677	-2.93328	0.015309	0.318477	-2.85847
HIST1H4D	-0.298528	6.02525	-2.93318	0.0153116	0.318477	-2.85863
MKRN1	-0.817117	11.1108	-2.93297	0.015317	0.318477	-2.85894
ZNF569	0.14935	5.85516	2.93204	0.0153413	0.318477	-2.86037
XAB2	-0.205276	5.81436	-2.93134	0.0153594	0.318477	-2.86143
FITM1	0.827118	7.57096	2.93092	0.0153703	0.318477	-2.86206
PM20D2	-1.01395	7.01104	-2.92909	0.0154181	0.319072	-2.86485
COX14	0.635093	7.22555	2.92658	0.0154838	0.319102	-2.86867
AMFR	-0.230709	5.96495	-2.92632	0.0154906	0.319102	-2.86906
CLCC1	-0.170008	5.83009	-2.92609	0.0154966	0.319102	-2.86941
AMY2A	0.869401	6.31225	2.92583	0.0155034	0.319102	-2.8698
EDEM2	0.761995	7.21088	2.924	0.0155516	0.319102	-2.87259
PHLDB1	0.282516	6.13354	2.92328	0.0155704	0.319102	-2.87367
DCAF11	1.06972	7.65581	2.92325	0.0155713	0.319102	-2.87372
RNASEH2B	-0.549221	6.13801	-2.92262	0.0155878	0.319102	-2.87467
ALG13	-0.207261	6.08983	-2.9225	0.0155911	0.319102	-2.87486
CFAP52	0.316007	6.16052	2.92162	0.0156144	0.319112	-2.8762
TAX1BP1	-0.389001	6.29483	-2.92069	0.0156389	0.319112	-2.87761
CHPT1	-0.551803	6.34213	-2.91958	0.0156684	0.319112	-2.8793
MYOT	-0.209083	5.90833	-2.91763	0.0157201	0.319112	-2.88225
ANXA13	-0.202351	5.82698	-2.91721	0.0157312	0.319112	-2.88289
ATP8B2	0.547313	6.9249	2.91719	0.0157318	0.319112	-2.88292
ING1	0.180862	5.98471	2.91593	0.0157656	0.319112	-2.88485
ZFPL1	-0.206877	5.86274	-2.91561	0.0157741	0.319112	-2.88533
SLFN5	1.48341	6.92243	2.91546	0.0157781	0.319112	-2.88556
PPEF2	0.284376	6.06115	2.91476	0.0157968	0.319112	-2.88662
PSAP	-0.700772	6.3204	-2.9146	0.0158012	0.319112	-2.88687
CHST1	-0.150474	6.03099	-2.91371	0.0158249	0.319204	-2.88821
IL17C	0.168798	6.00134	2.9106	0.0159086	0.319666	-2.89295
HNRNPDL	0.250299	5.97758	2.91016	0.0159203	0.319666	-2.89361
MRPL30	0.252706	6.00704	2.90968	0.0159334	0.319666	-2.89434
LEMD2	-0.223444	5.97245	-2.90921	0.015946	0.319666	-2.89506
AGTPBP1	-0.441707	6.50415	-2.90823	0.0159726	0.319666	-2.89655
SEPW1	0.471189	6.32263	2.90701	0.0160056	0.319666	-2.8984
TRAPPC2L	-1.4521	11.6069	-2.90349	0.0161012	0.319666	-2.90374
RNF123	-0.51978	6.59897	-2.90325	0.0161077	0.319666	-2.90411
MARCO	-0.151822	5.93667	-2.90284	0.016119	0.319666	-2.90474
CLDN3	0.179222	5.94013	2.90085	0.0161734	0.319666	-2.90776
RAB11FIP2	0.155887	5.93499	2.90054	0.016182	0.319666	-2.90824
LRRC34	-0.263034	6.08523	-2.89981	0.0162019	0.319666	-2.90934
ZNF526	1.48982	7.45383	2.89892	0.0162265	0.319666	-2.9107
EOGT	-0.363339	6.78765	-2.89836	0.0162418	0.319666	-2.91154
DALRD3	-0.140515	5.76438	-2.89815	0.0162477	0.319666	-2.91187
ZNF350	0.283888	6.0966	2.89791	0.0162542	0.319666	-2.91223
SUN1	0.153736	5.96399	2.89758	0.0162633	0.319666	-2.91273
HAUS8	-0.314343	6.29705	-2.89746	0.0162668	0.319666	-2.91292
TRIB1	-0.69368	6.09429	-2.89718	0.0162745	0.319666	-2.91335
TIPARP	0.681648	7.16192	2.89715	0.0162752	0.319666	-2.91339
RNF182	-0.296442	6.08615	-2.89708	0.016277	0.319666	-2.91349
TMEM53	-0.24544	6.06989	-2.89544	0.0163223	0.319666	-2.91598
TSSK1B	-1.46266	10.9587	-2.89516	0.0163302	0.319666	-2.91641
MOB3A	0.589876	7.01635	2.89432	0.0163534	0.319666	-2.91769
ADO	-1.26228	7.4276	-2.89377	0.0163687	0.319666	-2.91852
GRAMD1C	-0.228878	6.01628	-2.8929	0.0163928	0.319666	-2.91984
ZNF165	-0.281363	6.17445	-2.89232	0.016409	0.319666	-2.92073
AMIGO2	-0.862055	6.63963	-2.8909	0.0164484	0.319666	-2.92288
PNPO	0.231163	6.05549	2.88984	0.0164782	0.319666	-2.9245
CTDNEP1	-0.186102	5.77065	-2.8893	0.0164931	0.319666	-2.92532
UPP1	-0.172035	5.9905	-2.88846	0.0165167	0.319666	-2.9266
TP53TG5	-1.29372	7.27974	-2.88815	0.0165253	0.319666	-2.92706
C16orf86	0.340878	6.2716	2.88792	0.0165318	0.319666	-2.92741
NUP43	1.76296	7.16947	2.88755	0.0165421	0.319666	-2.92797
NR2F6	0.209012	6.01134	2.88651	0.0165714	0.319666	-2.92956
ZNF839	-0.244893	5.78179	-2.8857	0.0165941	0.319666	-2.93079
DENND4C	1.71559	7.62954	2.88504	0.0166126	0.319666	-2.93179
IL17D	-1.24958	7.13121	-2.88501	0.0166135	0.319666	-2.93184
PDSS2	0.397964	6.13296	2.88472	0.0166215	0.319666	-2.93227
DEPDC7	-0.250605	5.89789	-2.88422	0.0166358	0.319666	-2.93304
GDPD2	0.163507	6.04353	2.88274	0.0166775	0.319666	-2.93529
PCDHB11	-0.19772	5.97115	-2.8813	0.0167183	0.319666	-2.93748
DPPA2	-0.324708	5.81197	-2.88105	0.0167253	0.319666	-2.93785
VPS4A	0.212312	6.02067	2.88089	0.01673	0.319666	-2.93811
RPS6KB1	0.324026	6.22728	2.88031	0.0167465	0.319666	-2.93899
ZMYND12	-0.152048	5.83136	-2.88026	0.0167479	0.319666	-2.93906
RBM28	-0.159063	5.77366	-2.88022	0.0167489	0.319666	-2.93912
FUT6	1.40357	10.5068	2.87888	0.0167871	0.319666	-2.94116
ELOVL5	-0.482339	5.92072	-2.87802	0.0168116	0.319666	-2.94247
TMEM105	0.228722	6.13566	2.8779	0.0168151	0.319666	-2.94265
DIRC1	0.20274	6.12122	2.87767	0.0168215	0.319666	-2.943
TMEM201	0.229727	6.02421	2.8749	0.0169007	0.320704	-2.94721
NDUFV3	-0.471303	6.44522	-2.87423	0.0169198	0.320704	-2.94822
DSTYK	0.396519	6.13271	2.87375	0.0169336	0.320704	-2.94895
IRS1	-0.180009	5.69701	-2.87289	0.0169583	0.32081	-2.95026
HDDC2	-0.593906	6.55471	-2.87151	0.016998	0.321198	-2.95236
MORF4L2	0.233828	5.83612	2.87047	0.017028	0.321401	-2.95394
TMEM156	1.37002	7.5176	2.86858	0.0170829	0.322073	-2.95682
TNFRSF14	-0.525142	6.18197	-2.86738	0.0171175	0.322255	-2.95863
HLA-DRB3	-0.507094	6.18256	-2.86692	0.017131	0.322255	-2.95934
S100A4	0.353112	6.3938	2.86393	0.0172181	0.323009	-2.96389
COPS3	-0.14686	5.76625	-2.86365	0.0172261	0.323009	-2.96431
NADK2	-0.646634	6.41254	-2.86353	0.0172298	0.323009	-2.9645
GANC	0.295088	6.21993	2.86235	0.0172641	0.323009	-2.96628
GPRC5D	0.126813	5.81976	2.86172	0.0172827	0.323009	-2.96725
ASTE1	-0.567391	6.30222	-2.86158	0.0172868	0.323009	-2.96746
LRRC30	-0.166487	5.75542	-2.85851	0.0173769	0.323721	-2.97212
SERPINB13	-0.190465	5.89921	-2.85784	0.0173967	0.323721	-2.97314
EDN2	0.395222	6.74432	2.85726	0.0174139	0.323721	-2.97403
HS3ST3B1	-0.290144	5.95988	-2.85624	0.0174441	0.323721	-2.97558
DEF6	-0.633863	6.45744	-2.85609	0.0174486	0.323721	-2.97581
SMIM2	-1.04566	6.77877	-2.85583	0.0174561	0.323721	-2.9762
ETNPPL	0.196151	6.06462	2.85509	0.0174781	0.323721	-2.97733
GNPAT	-0.932899	6.97686	-2.85421	0.0175043	0.323721	-2.97867
RSBN1	0.162468	6.10752	2.85419	0.0175047	0.323721	-2.97869
DAD1	-1.52005	9.78732	-2.85374	0.0175183	0.323721	-2.97938
CXCL16	-0.531705	6.4407	-2.85115	0.0175954	0.323781	-2.98332
CCL14	0.781147	7.31854	2.85075	0.0176074	0.323781	-2.98393
LSMEM1	-0.303243	5.97753	-2.85052	0.017614	0.323781	-2.98427
CMTM2	-1.31644	8.06031	-2.85044	0.0176164	0.323781	-2.98439
HPSE	0.970435	7.13017	2.85008	0.0176272	0.323781	-2.98494
U2AF1L4	0.399498	6.82954	2.84974	0.0176376	0.323781	-2.98547
ARHGAP9	-0.355438	6.24214	-2.84763	0.0177008	0.324585	-2.98867
GALNT16	-0.383194	6.11291	-2.84579	0.017756	0.325138	-2.99147
SPIN2A	0.129597	5.74907	2.84413	0.0178061	0.325138	-2.99399
RGAG4	0.289227	6.24067	2.84376	0.0178172	0.325138	-2.99455
C2CD2L	-0.232433	6.01291	-2.84328	0.0178319	0.325138	-2.99529
RSAD2	1.54275	7.08671	2.84311	0.017837	0.325138	-2.99555
R3HDM4	0.427701	6.15135	2.84276	0.0178475	0.325138	-2.99607
AXIN1	-0.372338	6.13788	-2.84052	0.0179155	0.325764	-2.99948
CCDC90B	-1.13595	7.26296	-2.84035	0.0179207	0.325764	-2.99974
ATR	0.213254	5.99764	2.83922	0.0179551	0.326035	-3.00146
DUSP1	-0.428067	6.3082	-2.83571	0.0180624	0.327627	-3.0068
TGFB3	0.297152	6.81904	2.83462	0.0180958	0.327813	-3.00846
FBXO25	0.281991	6.07403	2.8319	0.0181794	0.327813	-3.01259
ALKBH7	-1.42302	8.69928	-2.83184	0.0181813	0.327813	-3.01268
NOA1	0.444883	6.28356	2.83168	0.0181862	0.327813	-3.01292
ZNF790	1.49779	7.40188	2.83143	0.0181938	0.327813	-3.0133
KCNF1	-0.587658	6.4759	-2.82971	0.018247	0.327813	-3.01591
SLC25A12	-0.137867	5.71925	-2.82947	0.0182546	0.327813	-3.01629
VCPIP1	-0.121685	5.7888	-2.82912	0.0182655	0.327813	-3.01682
AMER1	0.26025	6.17766	2.82816	0.0182951	0.327813	-3.01827
EGF	-0.15411	5.80148	-2.82792	0.0183026	0.327813	-3.01864
AGPAT1	-0.915809	7.42686	-2.82788	0.0183039	0.327813	-3.0187
FHL5	0.149374	5.88038	2.82731	0.0183217	0.327813	-3.01957
SLC12A4	-0.194365	5.88476	-2.82685	0.0183358	0.327813	-3.02026
CCM2	-0.269132	6.06751	-2.8265	0.0183467	0.327813	-3.0208
ZFP30	0.845682	6.90022	2.82539	0.0183813	0.32808	-3.02248
INCENP	0.312471	6.12126	2.82471	0.0184026	0.32811	-3.02352
CXCL8	-0.31328	6.11939	-2.82342	0.0184429	0.328307	-3.02548
USP18	-0.279896	5.94025	-2.8231	0.0184528	0.328307	-3.02596
LEKR1	-0.300657	6.02769	-2.82136	0.0185075	0.328685	-3.02862
VTI1B	0.15611	5.90972	2.82091	0.0185216	0.328685	-3.0293
COL12A1	0.176773	5.8493	2.82055	0.0185329	0.328685	-3.02984
FNBP1	-0.454282	6.05698	-2.8199	0.0185535	0.328702	-3.03084
TCIRG1	0.147178	5.84383	2.81854	0.0185963	0.329111	-3.0329
POMGNT1	-0.762967	6.83336	-2.8156	0.0186892	0.32978	-3.03737
DSG2	-0.185828	5.81927	-2.81544	0.0186943	0.32978	-3.03761
DSP	0.290147	6.32674	2.81527	0.0186998	0.32978	-3.03788
CHN1	-0.706349	6.48452	-2.81486	0.0187129	0.32978	-3.0385
FBXL20	-1.86434	9.07805	-2.81391	0.018743	0.329963	-3.03994
GRM3	0.958272	6.4881	2.81279	0.0187785	0.330241	-3.04164
TXNDC12	-0.307152	6.02841	-2.81175	0.0188117	0.330282	-3.04322
ZNF266	0.146969	5.83625	2.81149	0.0188203	0.330282	-3.04363
GTSF1L	-0.475295	6.29754	-2.81053	0.0188509	0.330474	-3.04509
PI16	0.397785	6.2043	2.80833	0.0189212	0.331359	-3.04842
DYNLT1	-0.285937	5.88022	-2.80535	0.0190174	0.331801	-3.05296
DVL1	0.237795	6.1064	2.8044	0.0190479	0.331801	-3.0544
FAM69B	-0.321375	6.25875	-2.80432	0.0190507	0.331801	-3.05453
RASSF4	0.214677	5.96525	2.80428	0.019052	0.331801	-3.05459
HAAO	0.233144	6.21743	2.80417	0.0190554	0.331801	-3.05475
EGFR	-0.477356	6.06243	-2.80386	0.0190654	0.331801	-3.05522
KMT2A	0.311728	5.95321	2.80105	0.0191567	0.332743	-3.0595
PMM2	0.155202	5.97967	2.80018	0.0191851	0.332743	-3.06082
MTHFD1	0.162476	6.05389	2.79999	0.0191911	0.332743	-3.06111
NRN1L	0.270715	6.0499	2.79935	0.0192119	0.332743	-3.06208
CD6	0.221029	6.01761	2.79858	0.0192373	0.332743	-3.06326
WRAP73	-0.202017	5.72003	-2.79775	0.0192642	0.332743	-3.06451
EBNA1BP2	-0.642385	6.30736	-2.79656	0.0193032	0.332743	-3.06632
CNOT3	-0.122917	5.73985	-2.79581	0.019328	0.332743	-3.06747
SIRPA	-0.274596	5.90227	-2.79502	0.0193537	0.332743	-3.06866
MIS18BP1	0.18355	5.88283	2.79502	0.0193538	0.332743	-3.06867
JDP2	0.623049	6.87304	2.79492	0.019357	0.332743	-3.06881
ZNF184	-0.197424	5.81335	-2.79395	0.0193891	0.332743	-3.0703
RSPH1	-0.697585	6.37081	-2.79333	0.0194095	0.332743	-3.07124
CD59	-0.511722	6.28815	-2.79303	0.0194193	0.332743	-3.07169
EYA3	-0.299736	5.76505	-2.79268	0.0194307	0.332743	-3.07222
TYSND1	-1.19187	7.70956	-2.79246	0.019438	0.332743	-3.07255
GMFG	-1.54289	8.10613	-2.79188	0.0194574	0.332743	-3.07344
SV2A	0.157891	6.02499	2.78864	0.0195645	0.334067	-3.07836
ITIH3	-0.596779	6.60355	-2.78834	0.0195747	0.334067	-3.07883
NOS1AP	0.729806	6.64874	2.78643	0.019638	0.334441	-3.08172
ME3	0.225678	6.07916	2.78593	0.0196549	0.334441	-3.08249
CCDC129	0.168271	5.92427	2.78536	0.019674	0.334441	-3.08336
CDK10	-0.885135	6.73879	-2.78483	0.0196915	0.334441	-3.08415
SCYL1	0.197533	6.16549	2.78413	0.0197148	0.334441	-3.08522
PAQR4	0.346862	6.41793	2.78409	0.0197165	0.334441	-3.08529
KRT82	0.308861	6.14105	2.78184	0.0197917	0.334687	-3.0887
COL25A1	-0.578914	6.47264	-2.78174	0.0197952	0.334687	-3.08886
IL13	-0.199546	6.00821	-2.78164	0.0197984	0.334687	-3.089
DNAH7	0.185269	6.05526	2.78103	0.0198191	0.334687	-3.08994
PRSS8	-0.434523	6.11918	-2.78068	0.0198309	0.334687	-3.09047
CHML	-0.228622	5.98639	-2.77988	0.0198577	0.334731	-3.09168
YTHDC1	-0.609959	6.43136	-2.77885	0.0198925	0.334731	-3.09325
ELL3	-0.311793	6.1645	-2.77882	0.0198935	0.334731	-3.09329
RMND1	0.164622	6.01617	2.77718	0.0199491	0.335328	-3.09579
TIMM22	0.562194	6.36083	2.77625	0.0199806	0.335522	-3.0972
ODC1	-1.54778	7.72132	-2.7741	0.0200537	0.336412	-3.10047
CEP19	0.873644	10.2594	2.77225	0.0201168	0.33658	-3.10328
POMGNT2	0.486141	7.01564	2.77224	0.020117	0.33658	-3.10329
ATG16L2	-0.515159	6.30048	-2.77146	0.0201437	0.33658	-3.10448
SYNE1	0.18035	5.96749	2.77125	0.020151	0.33658	-3.1048
WSCD1	-1.13246	8.05364	-2.77086	0.0201643	0.33658	-3.10539
SCAMP3	0.182172	5.99478	2.76954	0.0202096	0.337001	-3.1074
PAK4	0.212923	6.09572	2.76868	0.020239	0.337156	-3.10871
MPC2	-1.128	10.1213	-2.7679	0.020266	0.337271	-3.1099
RBBP5	1.46011	7.01395	2.76648	0.0203149	0.337342	-3.11206
MCM3	-0.28096	6.05427	-2.76634	0.0203199	0.337342	-3.11228
ZBTB22	-0.31009	6.0485	-2.76567	0.020343	0.337342	-3.11329
ATP6AP2	-0.208841	5.91415	-2.76544	0.0203509	0.337342	-3.11364
STK4	-0.469043	6.04075	-2.76438	0.0203875	0.337614	-3.11525
AP2B1	0.187018	6.32392	2.76337	0.0204225	0.337859	-3.11678
GAPDH	-0.294994	6.38286	-2.7606	0.0205187	0.338091	-3.12099
MYL5	-0.342576	6.27086	-2.75893	0.0205772	0.338091	-3.12354
ZMYND10	-1.35237	10.1654	-2.75799	0.0206099	0.338091	-3.12496
TUBGCP3	0.155831	5.81484	2.7574	0.0206306	0.338091	-3.12585
QKI	-0.131524	5.78549	-2.75668	0.0206559	0.338091	-3.12695
ZNF503	0.573167	7.22198	2.75668	0.020656	0.338091	-3.12696
PPP1R42	-0.157296	5.81227	-2.75601	0.0206794	0.338091	-3.12797
SCGN	-0.130864	5.79054	-2.75475	0.0207237	0.338091	-3.12989
C12orf54	-0.613125	6.50218	-2.75462	0.0207283	0.338091	-3.13008
DNAJC7	-0.598982	7.41876	-2.75427	0.0207408	0.338091	-3.13062
FLVCR2	-0.999911	6.28155	-2.75361	0.0207638	0.338091	-3.13162
SURF2	-0.417643	6.42007	-2.7534	0.0207711	0.338091	-3.13193
CHKB	-0.139463	5.78155	-2.75312	0.0207811	0.338091	-3.13236
HTR3C	0.267387	6.26592	2.75301	0.0207851	0.338091	-3.13253
C11orf68	-1.60923	9.26023	-2.75197	0.0208218	0.338091	-3.13411
MALSU1	-1.39233	8.63381	-2.75154	0.0208372	0.338091	-3.13477
EFNA4	0.236274	6.16623	2.75149	0.0208388	0.338091	-3.13484
BTN3A2	-0.143209	5.649	-2.75135	0.0208436	0.338091	-3.13505
BANP	-0.189388	6.00667	-2.75126	0.0208469	0.338091	-3.13519
POMP	-0.598504	6.52774	-2.75103	0.0208551	0.338091	-3.13554
SIN3B	0.32775	6.72804	2.75087	0.0208606	0.338091	-3.13578
C7	0.403549	6.41506	2.74727	0.0209887	0.338598	-3.14125
PLEKHH3	0.352601	6.22939	2.74622	0.0210263	0.338598	-3.14286
RFPL3	0.231145	6.17036	2.74594	0.0210363	0.338598	-3.14328
MRPS21	-0.967574	7.14692	-2.74453	0.0210867	0.338598	-3.14542
CPT1C	-1.25439	6.89613	-2.74432	0.021094	0.338598	-3.14573
ARSF	0.142614	5.96163	2.74305	0.0211397	0.338598	-3.14767
SYDE1	-0.326857	6.00177	-2.7426	0.0211558	0.338598	-3.14835
HLA-DRB4	-0.75388	6.50348	-2.74239	0.0211635	0.338598	-3.14867
HELLS	0.197086	5.87318	2.74172	0.0211874	0.338598	-3.14968
NOVA2	0.352069	6.97692	2.74124	0.0212049	0.338598	-3.15042
OR2M5	-0.147415	5.79796	-2.74033	0.0212377	0.338598	-3.1518
CFD	1.08492	6.69763	2.73988	0.0212538	0.338598	-3.15248
SPEM1	-0.304098	6.30295	-2.73976	0.0212581	0.338598	-3.15266
MSTO1	-1.12048	8.7558	-2.73949	0.0212679	0.338598	-3.15308
CABYR	-0.87075	10.7525	-2.73922	0.0212779	0.338598	-3.1535
KREMEN1	0.183023	5.86979	2.7386	0.0213001	0.338598	-3.15443
KPNB1	-0.464337	6.30163	-2.73845	0.0213054	0.338598	-3.15465
RPLP1	-0.435306	6.41323	-2.73797	0.0213228	0.338598	-3.15538
SIX2	-0.230422	5.94328	-2.73746	0.0213415	0.338598	-3.15617
MAP3K12	-0.190265	5.74212	-2.73737	0.0213448	0.338598	-3.1563
SAMD1	0.3572	6.1346	2.73663	0.0213715	0.338598	-3.15742
METTL2B	1.4075	7.40377	2.73573	0.0214043	0.338598	-3.1588
NRG4	-0.282041	5.93405	-2.73552	0.0214121	0.338598	-3.15912
BICD2	-0.244122	5.77843	-2.73499	0.0214311	0.338598	-3.15991
HVCN1	-1.33984	7.66949	-2.73437	0.0214538	0.338598	-3.16086
HMOX1	-0.682549	6.60621	-2.73397	0.0214685	0.338598	-3.16147
SRP54	-0.783302	11.8635	-2.73388	0.0214718	0.338598	-3.16161
ERBB4	0.198672	6.073	2.73277	0.0215121	0.338598	-3.16329
RPL36A	0.13293	5.87127	2.73276	0.0215126	0.338598	-3.16331
TMEM42	-0.249733	6.0967	-2.73152	0.021558	0.338598	-3.1652
CECR6	0.1369	5.95832	2.731	0.021577	0.338598	-3.16598
TMEM200A	0.180401	6.10843	2.73088	0.0215816	0.338598	-3.16617
HTRA4	0.21387	5.99313	2.73051	0.0215951	0.338598	-3.16673
KCNH7	0.138495	5.85367	2.72923	0.0216418	0.338598	-3.16866
HCAR1	0.133653	5.83134	2.72912	0.0216459	0.338598	-3.16883
DNTTIP1	-0.170216	5.71121	-2.72899	0.0216509	0.338598	-3.16904
GNG8	-0.320748	5.83431	-2.72896	0.0216518	0.338598	-3.16908
SARS2	-1.08449	7.27381	-2.72849	0.0216693	0.338598	-3.1698
SLAMF9	0.132678	5.85478	2.728	0.0216871	0.338598	-3.17053
LSM14A	-1.35268	7.74048	-2.72763	0.0217008	0.338598	-3.1711
RXFP4	0.142916	5.82134	2.72627	0.0217511	0.339066	-3.17317
LGMN	-0.317887	6.04255	-2.72509	0.0217947	0.339429	-3.17496
DYRK1B	-0.811424	7.0979	-2.7238	0.0218426	0.339783	-3.17692
CALCOCO2	-0.16198	5.89569	-2.72311	0.0218681	0.339783	-3.17796
DCLRE1B	0.610494	6.06599	2.72284	0.0218782	0.339783	-3.17838
FAM216A	-1.11877	6.89328	-2.72054	0.0219639	0.340546	-3.18188
SIL1	-1.43038	9.81517	-2.72043	0.0219681	0.340546	-3.18204
AHRR	-0.187158	5.70219	-2.71909	0.0220181	0.341006	-3.18408
POU2F1	1.07455	7.09608	2.71824	0.0220498	0.341181	-3.18537
SCG3	0.183632	5.9029	2.71603	0.0221331	0.342138	-3.18873
DAB2IP	0.305964	6.15111	2.71479	0.0221797	0.342138	-3.19062
TDG	1.88796	7.17961	2.71421	0.0222016	0.342138	-3.1915
C2orf88	-1.52858	7.94125	-2.71395	0.0222114	0.342138	-3.19189
CBWD2	-0.223455	6.02647	-2.71328	0.0222365	0.342138	-3.1929
ZNF511	0.232045	6.04677	2.71254	0.0222644	0.342138	-3.19402
NKX3-1	1.97691	7.62579	2.71232	0.022273	0.342138	-3.19437
TXNDC15	-0.706421	7.08744	-2.71226	0.0222752	0.342138	-3.19446
MISP3	0.135071	5.96581	2.7105	0.0223418	0.342848	-3.19713
XAGE5	0.142971	5.81318	2.70915	0.0223931	0.342955	-3.19918
HSD17B13	0.25113	6.08501	2.70846	0.0224195	0.342955	-3.20023
MYBPC1	0.982087	6.89828	2.70832	0.0224249	0.342955	-3.20044
FAM156A	-0.349486	5.89815	-2.70816	0.0224308	0.342955	-3.20068
CSNK1G1	-0.175512	5.7994	-2.70554	0.0225312	0.343406	-3.20467
SRGAP2	-0.164739	5.81893	-2.70453	0.0225695	0.343406	-3.20619
MYCBPAP	-0.346883	6.36168	-2.70445	0.0225727	0.343406	-3.20632
RILPL2	-0.177048	5.98295	-2.70436	0.0225762	0.343406	-3.20645
PTDSS2	-2.07378	8.64201	-2.70406	0.0225876	0.343406	-3.20691
SGCA	-0.176925	5.67528	-2.70364	0.0226038	0.343406	-3.20755
CD81	-1.27894	8.06947	-2.70364	0.0226039	0.343406	-3.20755
REP15	0.128778	5.84138	2.70107	0.0227027	0.344183	-3.21145
ASZ1	0.14297	5.87033	2.70076	0.0227149	0.344183	-3.21193
HTR2A	0.573899	6.15431	2.70071	0.0227167	0.344183	-3.212
C16orf54	0.215159	5.94617	2.69947	0.0227648	0.344402	-3.21389
TRMU	0.168626	5.93657	2.69878	0.0227913	0.344402	-3.21493
ANO4	0.190742	6.08455	2.69874	0.0227928	0.344402	-3.21499
C6orf62	0.271402	6.0413	2.6982	0.0228138	0.344409	-3.21581
PER1	0.233696	6.49915	2.69723	0.0228514	0.344665	-3.21728
NR1H3	-0.160212	5.78669	-2.69556	0.0229163	0.345332	-3.21982
N4BP3	0.165055	5.83184	2.69372	0.0229882	0.345957	-3.22262
GRK1	0.126166	5.92137	2.69344	0.022999	0.345957	-3.22304
IRF6	-0.186868	5.81861	-2.69281	0.0230236	0.346016	-3.22399
LAMP5	-0.298136	6.17912	-2.69121	0.0230864	0.346044	-3.22643
CBX7	-0.394708	6.24989	-2.69119	0.0230873	0.346044	-3.22646
YWHAQ	-0.9682	7.33048	-2.69088	0.0230992	0.346044	-3.22692
CETN1	-0.414717	5.92752	-2.69029	0.0231226	0.346044	-3.22782
FREM1	-0.261117	6.10328	-2.69009	0.0231305	0.346044	-3.22813
RPA4	0.38706	6.12776	2.68955	0.0231515	0.346044	-3.22894
HIST1H4F	-0.186692	5.74946	-2.68861	0.0231888	0.346044	-3.23038
MFSD10	-0.610471	6.39621	-2.68855	0.0231909	0.346044	-3.23046
HK3	-0.207148	5.8633	-2.68568	0.0233046	0.347075	-3.23483
JADE3	0.196522	5.93459	2.68535	0.0233176	0.347075	-3.23533
PRKAG3	0.177423	6.21531	2.68523	0.0233222	0.347075	-3.2355
ZNF160	1.35101	8.13972	2.68245	0.0234328	0.348345	-3.23973
ST3GAL2	-1.49982	7.36712	-2.68171	0.023462	0.348345	-3.24084
SLC24A4	0.191096	5.99095	2.68039	0.0235149	0.348345	-3.24286
GSTO1	-1.28516	8.00465	-2.67814	0.023605	0.348345	-3.24627
MYOM2	-0.178864	5.98768	-2.67779	0.0236191	0.348345	-3.2468
WDR3	-0.142867	5.77605	-2.67767	0.0236238	0.348345	-3.24698
TG	-0.15222	5.78246	-2.67477	0.0237404	0.348345	-3.25138
HOXA6	0.56435	7.72149	2.67464	0.0237459	0.348345	-3.25159
TMCO4	0.260104	6.19078	2.67459	0.0237479	0.348345	-3.25166
IRS4	-0.142402	5.75921	-2.67442	0.0237545	0.348345	-3.25191
PTCHD1	0.337664	5.97042	2.67414	0.023766	0.348345	-3.25234
NUS1	-0.190856	5.82796	-2.67307	0.0238092	0.348345	-3.25396
PLEKHM2	-0.216512	5.7026	-2.67296	0.0238137	0.348345	-3.25413
ETV7	0.232684	5.9769	2.67219	0.0238448	0.348345	-3.2553
DENND4A	-0.312099	5.89278	-2.67163	0.0238677	0.348345	-3.25616
FOXM1	-1.44617	7.41607	-2.67138	0.0238778	0.348345	-3.25653
PSG1	-0.114562	5.78592	-2.67099	0.0238935	0.348345	-3.25712
CETN2	-0.494373	6.23653	-2.66999	0.0239343	0.348345	-3.25865
AFAP1L2	0.245669	6.0241	2.66941	0.023958	0.348345	-3.25953
HIST1H2BE	-0.20949	5.79116	-2.66857	0.023992	0.348345	-3.26079
EIF2B4	-1.39105	10.9191	-2.66833	0.0240017	0.348345	-3.26116
KIAA0930	-1.47826	8.18025	-2.66647	0.0240779	0.348345	-3.26398
AHI1	-0.243639	5.84819	-2.66646	0.0240783	0.348345	-3.264
RRM2	0.218929	6.01954	2.66639	0.0240811	0.348345	-3.2641
ZNF347	0.127589	5.88765	2.66582	0.0241046	0.348345	-3.26498
NAMPT	-0.234751	5.84419	-2.66573	0.024108	0.348345	-3.2651
TM4SF1	0.146127	5.85911	2.66501	0.0241377	0.348345	-3.2662
ICAM2	-0.131884	5.79158	-2.66473	0.024149	0.348345	-3.26662
C19orf66	0.337248	6.20092	2.66459	0.0241548	0.348345	-3.26683
PXN	0.610905	6.33497	2.66393	0.0241822	0.348345	-3.26784
GALNT9	-0.645885	6.51927	-2.66384	0.0241858	0.348345	-3.26798
ZAK	-0.174278	5.90825	-2.66378	0.0241883	0.348345	-3.26807
DLK2	0.187916	5.93778	2.66351	0.0241992	0.348345	-3.26847
BSN	-1.47154	7.00142	-2.66284	0.024227	0.348345	-3.2695
DENR	-0.190787	5.78518	-2.66254	0.0242391	0.348345	-3.26994
EIF4A2	-0.282014	6.01038	-2.66159	0.0242782	0.348345	-3.27138
SLC35A2	0.397155	6.44479	2.66154	0.0242805	0.348345	-3.27147
CDK5RAP3	-0.735284	6.53434	-2.66129	0.0242906	0.348345	-3.27184
LDB3	0.295252	6.19409	2.66129	0.0242908	0.348345	-3.27185
EGFL8	0.400627	6.10996	2.6611	0.0242987	0.348345	-3.27214
SNX6	0.38733	6.44294	2.66071	0.0243147	0.348345	-3.27272
ARGLU1	-0.175274	5.87186	-2.66057	0.0243204	0.348345	-3.27293
SGF29	-0.195586	6.09589	-2.6602	0.0243357	0.348345	-3.2735
FOSB	-1.4778	9.11307	-2.65968	0.0243575	0.348345	-3.27429
ZC2HC1B	-0.266962	6.18568	-2.65939	0.0243692	0.348345	-3.27472
NET1	1.58305	7.14968	2.65839	0.0244106	0.348345	-3.27624
CFAP53	-0.752875	6.49383	-2.65779	0.0244358	0.348345	-3.27716
OR5AR1	0.19559	6.20895	2.65765	0.0244414	0.348345	-3.27736
BCAM	0.259143	6.36546	2.65758	0.0244445	0.348345	-3.27748
CCDC54	-0.398517	6.43771	-2.65695	0.0244707	0.348345	-3.27843
ZNF362	0.450058	6.52943	2.65651	0.024489	0.348345	-3.2791
CROT	1.0477	7.40407	2.65613	0.0245049	0.348345	-3.27968
TMEM173	-0.142495	5.82723	-2.65589	0.0245145	0.348345	-3.28003
GLRA2	-0.163963	5.78349	-2.6555	0.024531	0.348345	-3.28063
FAAP24	0.553339	7.60578	2.65293	0.0246385	0.349282	-3.28453
SYDE2	0.770846	12.2163	2.65292	0.0246387	0.349282	-3.28454
TIMP1	-0.769842	6.89032	-2.65181	0.0246852	0.349392	-3.28622
RNF32	-0.176695	6.08915	-2.65174	0.0246882	0.349392	-3.28633
SGK1	-0.43173	6.19806	-2.651	0.0247193	0.349536	-3.28746
IER3	-0.339462	6.18788	-2.65024	0.0247514	0.349694	-3.28861
KDR	0.466818	6.63031	2.64945	0.0247847	0.349757	-3.28982
CNOT11	-0.455525	6.20471	-2.64914	0.0247976	0.349757	-3.29028
FUBP1	-0.172695	6.05833	-2.64654	0.0249075	0.351011	-3.29423
FCHSD1	0.137569	5.91673	2.64509	0.0249687	0.351263	-3.29642
EMILIN3	0.219481	5.8635	2.64507	0.0249696	0.351263	-3.29645
HACD2	-0.624377	6.47923	-2.64463	0.0249883	0.351263	-3.29712
CLPTM1L	-0.835577	7.12209	-2.64307	0.0250546	0.3519	-3.29948
TOP2B	-0.126591	5.75414	-2.64255	0.0250768	0.351916	-3.30027
ANAPC11	-1.48235	8.61702	-2.64182	0.0251078	0.351916	-3.30137
DMAP1	-0.236349	5.98261	-2.64084	0.0251499	0.351916	-3.30287
2020-12-01	-0.185997	5.88239	-2.64042	0.0251681	0.351916	-3.30351
NFXL1	-0.325287	5.84972	-2.64015	0.0251795	0.351916	-3.30392
DCTN6	-0.180639	5.83876	-2.64009	0.0251819	0.351916	-3.304
ATAT1	-0.151105	6.01939	-2.63949	0.0252076	0.351982	-3.30491
IL5	0.269947	6.08167	2.63899	0.0252291	0.351988	-3.30567
TMEM11	0.230356	5.96922	2.63695	0.0253169	0.352634	-3.30877
ATP23	0.161387	5.89421	2.63693	0.0253175	0.352634	-3.30879
CDADC1	-0.335933	5.89199	-2.63635	0.0253426	0.35269	-3.30968
MRPL3	0.162111	5.80931	2.63515	0.0253943	0.35285	-3.31149
TNFSF13B	-0.187013	5.85017	-2.63506	0.0253982	0.35285	-3.31163
CARMIL1	-0.211942	5.84293	-2.63429	0.0254313	0.35285	-3.3128
PIGX	1.18248	8.88687	2.63369	0.0254573	0.35285	-3.31371
CEBPD	-0.148224	5.9931	-2.63364	0.0254595	0.35285	-3.31378
HELB	0.144526	6.07622	2.63185	0.025537	0.353632	-3.3165
CBX5	-0.545903	6.30075	-2.62891	0.025665	0.354858	-3.32095
KLHDC9	0.73994	7.47889	2.62884	0.0256679	0.354858	-3.32106
ANP32C	0.168836	5.92442	2.62766	0.0257194	0.355126	-3.32285
AGT	-0.193545	5.76047	-2.62743	0.0257298	0.355126	-3.3232
AMH	-0.194631	5.88287	-2.62585	0.0257987	0.355784	-3.32559
SLFN13	0.601109	13.963	2.62504	0.0258343	0.355855	-3.32682
PDHB	0.411072	6.99777	2.62477	0.0258464	0.355855	-3.32724
PPP1R11	-1.00477	7.48514	-2.62254	0.0259446	0.356915	-3.33062
MCM4	0.226559	5.84847	2.62064	0.0260285	0.357742	-3.3335
PGLYRP2	0.218399	6.07468	2.61921	0.0260916	0.357742	-3.33566
SAT1	-0.88296	6.60908	-2.61831	0.0261315	0.357742	-3.33702
ARMC7	-0.425075	6.30643	-2.61823	0.0261351	0.357742	-3.33714
GPC3	-0.196638	5.69058	-2.61805	0.0261434	0.357742	-3.33742
CYP1A2	0.207145	6.36405	2.61765	0.0261611	0.357742	-3.33803
TACC3	-0.273517	5.91867	-2.61749	0.0261683	0.357742	-3.33827
USP50	0.245997	5.93527	2.61712	0.0261845	0.357742	-3.33883
TBK1	-0.471079	6.48481	-2.61613	0.0262288	0.357742	-3.34033
IRX6	0.395668	6.4439	2.61592	0.0262382	0.357742	-3.34065
KDM4A	0.180514	6.10822	2.61588	0.0262398	0.357742	-3.34071
LRRC15	0.18986	6.07486	2.61456	0.0262987	0.358018	-3.34271
ZNF492	1.60644	11.1643	2.61447	0.0263028	0.358018	-3.34285
GREM1	-0.132894	5.86794	-2.61272	0.0263812	0.358793	-3.3455
SIRPB2	0.248369	6.26128	2.61207	0.0264102	0.358818	-3.34648
SCUBE3	-0.142609	5.83836	-2.61149	0.0264363	0.358818	-3.34736
SMS	0.170834	6.09483	2.61095	0.0264605	0.358818	-3.34817
APOO	0.232546	5.97379	2.61077	0.0264688	0.358818	-3.34845
SLC9A7	0.142524	6.02632	2.60949	0.0265261	0.359305	-3.35038
LOC283440	-0.206336	5.83555	-2.60805	0.0265914	0.359897	-3.35257
DDX24	-0.637134	6.84008	-2.60692	0.0266424	0.359988	-3.35428
ABCG2	-0.554963	6.47966	-2.60682	0.0266468	0.359988	-3.35443
SPACA9	-0.364904	6.19863	-2.60566	0.0266995	0.359988	-3.35619
CST7	0.243381	6.00024	2.60559	0.0267027	0.359988	-3.3563
BCL11A	1.58496	7.11858	2.60553	0.0267056	0.359988	-3.3564
NUDT1	-0.366272	6.0106	-2.60458	0.0267486	0.360277	-3.35783
TNNI2	-0.109649	5.71299	-2.60303	0.0268191	0.360937	-3.36017
NYX	0.385255	6.23993	2.60183	0.0268737	0.361356	-3.36199
AMDHD2	-0.590857	6.41727	-2.6014	0.0268934	0.361356	-3.36264
SMAD7	0.203809	6.02047	2.59985	0.0269644	0.361859	-3.36499
STRN	0.130743	5.84738	2.59901	0.027003	0.361859	-3.36626
USP28	-0.194606	5.79955	-2.59882	0.0270118	0.361859	-3.36656
CKMT1B	0.143229	5.98997	2.59823	0.0270386	0.361859	-3.36744
USH1G	0.610863	9.41067	2.59823	0.027039	0.361859	-3.36745
SUFU	0.221604	5.98813	2.59636	0.0271248	0.362164	-3.37027
RNASET2	-0.951849	7.12738	-2.59635	0.0271252	0.362164	-3.37029
SMPD1	-0.186969	5.90977	-2.5961	0.0271367	0.362164	-3.37066
GABRQ	0.183966	6.03082	2.59585	0.0271482	0.362164	-3.37105
CCT3	-0.343564	6.05472	-2.59489	0.0271929	0.362472	-3.37251
TDRD5	-0.419396	6.19122	-2.59304	0.0272783	0.36332	-3.3753
NOC2L	0.324164	6.24967	2.59223	0.0273158	0.363531	-3.37653
CYP4A11	-1.38598	9.92765	-2.58998	0.0274203	0.364162	-3.37993
CBX3	-0.164306	5.95461	-2.58955	0.0274404	0.364162	-3.38058
TXNRD1	0.182452	6.29493	2.5892	0.0274569	0.364162	-3.38112
SPTB	-0.247677	6.04559	-2.58843	0.0274929	0.364162	-3.38229
POMK	-0.137762	5.7086	-2.58825	0.0275013	0.364162	-3.38256
HAUS5	0.373698	6.469	2.58812	0.0275076	0.364162	-3.38276
JPH3	0.290907	6.05603	2.58758	0.0275328	0.364162	-3.38358
ADAMTS18	0.880564	6.47291	2.58723	0.027549	0.364162	-3.3841
CREM	0.161567	5.86424	2.58702	0.027559	0.364162	-3.38442
MRPL38	-0.177381	5.83964	-2.5857	0.0276208	0.364504	-3.38642
KIF20A	0.182344	6.06983	2.58549	0.0276308	0.364504	-3.38674
SLC25A15	-0.176485	5.74979	-2.58507	0.0276502	0.364504	-3.38737
ITGAX	-0.658546	6.20333	-2.5833	0.0277335	0.365314	-3.39005
UGGT2	-0.288031	6.20565	-2.58227	0.027782	0.365665	-3.3916
KRIT1	0.129674	5.89507	2.58154	0.0278165	0.365832	-3.39271
SEC22A	-0.32739	6.26517	-2.58103	0.0278408	0.365864	-3.39349
DYM	-0.550904	6.86342	-2.58008	0.0278858	0.366039	-3.39493
TCN1	-0.152271	5.87187	-2.57983	0.0278978	0.366039	-3.39531
SLC12A7	-0.221944	5.88316	-2.57811	0.0279793	0.36682	-3.39791
FLOT2	0.573124	7.36155	2.57655	0.0280537	0.367507	-3.40027
EIF3C	-0.26856	6.16421	-2.57578	0.0280905	0.367702	-3.40144
CD58	-0.119662	5.86502	-2.57475	0.0281394	0.367896	-3.40299
MRGBP	-0.800957	6.44274	-2.57416	0.0281678	0.367896	-3.40388
SLC25A28	-1.14662	7.52323	-2.57398	0.0281765	0.367896	-3.40416
SPC24	0.688979	6.39346	2.57363	0.0281932	0.367896	-3.40469
NLRP3	-0.536737	6.07443	-2.5726	0.0282422	0.368249	-3.40624
PCDHA9	0.125331	6.03884	2.57152	0.0282943	0.368555	-3.40787
AK3	1.17958	6.57306	2.57087	0.0283255	0.368555	-3.40886
MACF1	-0.440039	6.1845	-2.57025	0.0283552	0.368555	-3.40979
PAG1	0.689522	6.44958	2.57	0.0283676	0.368555	-3.41018
ASH2L	-0.194737	5.98232	-2.56947	0.0283932	0.368555	-3.41098
OPN5	-0.221695	5.99372	-2.56937	0.0283978	0.368555	-3.41113
ABCG1	-0.3426	5.93531	-2.56849	0.0284405	0.368742	-3.41246
ALDH1B1	0.180767	6.06068	2.56781	0.0284733	0.368742	-3.41349
RBMX	0.501989	6.26632	2.56766	0.0284805	0.368742	-3.41371
AUH	-0.307537	6.01639	-2.56664	0.02853	0.368742	-3.41526
SGCD	-0.145597	5.9386	-2.56651	0.0285364	0.368742	-3.41546
PILRA	0.178459	6.17156	2.56634	0.0285444	0.368742	-3.41571
LYZL2	-0.420829	6.28061	-2.56399	0.0286586	0.36948	-3.41927
GLIPR1	0.142505	6.01824	2.56379	0.0286683	0.36948	-3.41957
CMC2	-1.11025	8.94475	-2.56362	0.0286765	0.36948	-3.41982
TMEM38B	-1.43565	9.08353	-2.56292	0.0287108	0.36948	-3.42088
CD47	-0.278002	5.9436	-2.5629	0.0287118	0.36948	-3.42092
PCDHB6	-0.141828	5.78881	-2.56218	0.028747	0.369649	-3.42201
WEE1	-0.200901	5.926	-2.55928	0.0288891	0.370745	-3.42639
IFRD1	-0.572267	6.40148	-2.55904	0.0289006	0.370745	-3.42675
PTEN	-0.256426	6.00237	-2.55901	0.0289024	0.370745	-3.4268
ENPP5	-0.12069	5.75759	-2.55826	0.028939	0.370745	-3.42793
BHLHE40	-0.929126	6.31548	-2.55791	0.0289563	0.370745	-3.42846
RSL24D1	-0.57926	6.4993	-2.55765	0.0289692	0.370745	-3.42886
KLHL42	1.9158	6.91597	2.55693	0.0290045	0.370745	-3.42994
ATP5C1	-0.154768	5.73687	-2.55646	0.0290277	0.370745	-3.43065
INSM1	0.181609	5.98862	2.55593	0.0290536	0.370745	-3.43145
PANK2	-0.202039	5.87697	-2.55593	0.0290538	0.370745	-3.43145
SPA17	-0.421586	6.33754	-2.55526	0.0290868	0.370884	-3.43246
IFI35	0.24879	6.12474	2.55368	0.0291652	0.371602	-3.43486
RNF217	-0.414887	6.25636	-2.55203	0.0292471	0.372361	-3.43735
SPIB	0.457761	6.64098	2.54979	0.0293583	0.373493	-3.44073
TFAM	0.180356	5.90839	2.54928	0.0293839	0.373535	-3.44151
TSHZ1	0.337781	6.12124	2.54851	0.0294224	0.373741	-3.44267
TRIM71	0.175576	6.03088	2.54695	0.0295004	0.374271	-3.44503
CDK5RAP1	-0.224622	6.10145	-2.54678	0.0295089	0.374271	-3.44528
SLC17A5	-0.226236	6.05319	-2.54589	0.0295537	0.374556	-3.44663
PDHX	-0.190569	5.849	-2.54424	0.0296363	0.375261	-3.44912
TCP11L1	0.260072	6.38562	2.54389	0.0296542	0.375261	-3.44965
HADHA	0.181204	5.91081	2.54071	0.0298147	0.376705	-3.45445
TBC1D4	0.151377	5.96896	2.54044	0.0298284	0.376705	-3.45486
CHUK	0.163965	5.89902	2.53961	0.0298703	0.376705	-3.45611
TP53AIP1	0.160351	6.11353	2.53943	0.0298797	0.376705	-3.45639
MPV17	-0.294343	6.00707	-2.53941	0.0298808	0.376705	-3.45642
SLC22A1	0.113571	5.82952	2.53894	0.0299046	0.376722	-3.45713
TNFRSF19	-0.142342	5.87004	-2.5379	0.0299573	0.377039	-3.4587
C12orf40	-0.149957	5.80052	-2.53738	0.0299837	0.377039	-3.45948
OR2AG2	0.5579	7.29716	2.53712	0.0299973	0.377039	-3.45989
FAM150B	-0.227701	5.96056	-2.53599	0.0300549	0.377478	-3.46159
ERI3	-0.263717	5.73613	-2.53495	0.030108	0.377862	-3.46316
MS4A6E	-0.756879	6.62473	-2.53254	0.0302312	0.379114	-3.46679
NUSAP1	0.147413	6.01852	2.53212	0.030253	0.379114	-3.46743
MIIP	-0.510403	6.35446	-2.53123	0.0302988	0.379179	-3.46878
ZFAND3	0.254505	6.12616	2.5309	0.0303158	0.379179	-3.46927
RECQL4	-0.23273	5.99827	-2.53032	0.0303455	0.379179	-3.47015
ZNRF3	0.255556	6.07605	2.52949	0.0303886	0.379179	-3.47141
STAT5A	-0.243002	6.09279	-2.5292	0.0304035	0.379179	-3.47184
EIF3I	0.579944	6.3282	2.52906	0.0304105	0.379179	-3.47205
CNTN1	-0.869606	6.80514	-2.52894	0.0304167	0.379179	-3.47223
LUM	-0.199254	6.02998	-2.5278	0.0304757	0.379631	-3.47395
C1orf43	-1.4208	8.18981	-2.52639	0.0305485	0.379784	-3.47607
TNS4	0.475484	6.69921	2.52612	0.0305628	0.379784	-3.47649
ZKSCAN4	-0.151543	5.92901	-2.52603	0.0305676	0.379784	-3.47663
SLITRK4	0.649038	6.3214	2.52565	0.0305872	0.379784	-3.4772
DPM1	-1.47639	7.96422	-2.52512	0.0306146	0.379784	-3.47799
SPATA5L1	-0.770844	6.41363	-2.52494	0.0306241	0.379784	-3.47827
DTD2	0.564453	6.43744	2.52331	0.0307088	0.380179	-3.48073
FLII	-0.199139	5.8808	-2.52235	0.0307593	0.380179	-3.48219
OARD1	-1.49056	7.91758	-2.52231	0.0307611	0.380179	-3.48224
PCDHA8	0.305179	6.31057	2.52215	0.0307696	0.380179	-3.48248
ILK	-1.05869	7.66069	-2.52194	0.0307804	0.380179	-3.4828
EEA1	-0.272098	5.95679	-2.52138	0.0308097	0.380179	-3.48364
GOT1	0.754759	6.63121	2.52128	0.0308149	0.380179	-3.48379
EFR3A	-0.146621	5.82683	-2.51918	0.0309253	0.380427	-3.48697
TNFRSF25	0.192369	6.01311	2.51893	0.030938	0.380427	-3.48734
OR8B4	0.339774	6.57108	2.51889	0.0309406	0.380427	-3.48741
VAMP3	0.176918	5.97107	2.51868	0.0309516	0.380427	-3.48772
FGGY	-0.196752	5.8474	-2.51844	0.0309642	0.380427	-3.48809
CABIN1	0.15858	5.98053	2.5183	0.0309713	0.380427	-3.48829
CTR9	0.220998	5.93998	2.51572	0.0311071	0.381815	-3.49218
ARHGEF26	0.220783	6.03195	2.51449	0.0311723	0.382334	-3.49404
CDH19	0.462299	6.13319	2.51361	0.0312189	0.382435	-3.49537
ZNF439	0.145166	5.94134	2.5133	0.0312354	0.382435	-3.49584
RPL3L	-0.163184	5.7475	-2.51277	0.0312637	0.382435	-3.49664
TACSTD2	-0.242063	5.79516	-2.51259	0.0312733	0.382435	-3.49691
HNRNPH1	-1.29692	10.2638	-2.51206	0.0313014	0.382435	-3.49771
KCTD4	-0.200631	5.90196	-2.51175	0.0313176	0.382435	-3.49817
EVA1C	-0.538758	6.56505	-2.51003	0.0314091	0.382697	-3.50076
PROS1	-0.22432	5.89752	-2.51003	0.0314095	0.382697	-3.50077
SUGCT	0.5694	6.83968	2.50989	0.0314167	0.382697	-3.50098
ABCB10	0.147711	6.11067	2.50936	0.0314453	0.382697	-3.50179
TMA7	0.346868	6.39158	2.50921	0.0314533	0.382697	-3.50201
NME9	0.349501	6.45753	2.50777	0.0315302	0.383094	-3.50418
MSMO1	0.183358	5.94951	2.50727	0.031557	0.383094	-3.50494
S100A7A	-0.73899	6.53324	-2.50682	0.031581	0.383094	-3.50561
NID2	0.28285	6.04265	2.50674	0.0315853	0.383094	-3.50573
PRICKLE2	-0.184992	5.85723	-2.50646	0.0316003	0.383094	-3.50616
SLC19A1	-0.290822	5.93368	-2.50553	0.0316501	0.38311	-3.50755
GORASP2	-1.45259	8.00457	-2.50454	0.0317033	0.38311	-3.50904
UBE4A	-0.312954	6.14169	-2.50405	0.03173	0.38311	-3.50979
GLUL	-0.806692	6.68381	-2.50371	0.0317479	0.38311	-3.51029
CERS1	-1.61219	8.52362	-2.50368	0.0317498	0.38311	-3.51035
TRANK1	-0.166495	5.93373	-2.50363	0.0317523	0.38311	-3.51042
MYB	0.197539	5.96712	2.50313	0.0317794	0.38311	-3.51117
IL10RB	-0.301738	6.0161	-2.50286	0.0317941	0.38311	-3.51159
SPATA18	-1.43316	7.68963	-2.50213	0.0318337	0.38311	-3.51269
CD28	0.1205	6.00909	2.50204	0.0318384	0.38311	-3.51282
POLR1A	0.249375	6.06106	2.50176	0.0318534	0.38311	-3.51324
NADK	-0.307944	6.031	-2.50086	0.0319021	0.383179	-3.5146
AKAP5	0.142499	5.87945	2.50054	0.0319194	0.383179	-3.51508
TRAM1L1	0.135643	5.73902	2.50039	0.0319277	0.383179	-3.51531
LSM3	0.240394	6.16272	2.4998	0.0319597	0.383234	-3.5162
CFB	-0.177827	5.91141	-2.49906	0.0319997	0.383234	-3.51731
GABRD	-0.314711	5.99678	-2.49852	0.0320289	0.383234	-3.51812
LAMA2	-0.21738	5.90583	-2.49783	0.0320665	0.383234	-3.51916
CCRL2	-0.477405	6.14347	-2.49707	0.0321081	0.383234	-3.52031
EXOSC2	0.616257	12.9714	2.49668	0.0321295	0.383234	-3.52091
CYB5A	0.158829	5.89434	2.49665	0.0321311	0.383234	-3.52095
SUGP1	-0.401716	6.29563	-2.49597	0.032168	0.383234	-3.52197
ANKRD54	-0.16427	5.85462	-2.49517	0.032212	0.383234	-3.52318
TMC4	0.427084	6.54538	2.49508	0.0322166	0.383234	-3.52331
KRT84	0.592192	6.87724	2.49478	0.0322333	0.383234	-3.52377
MTMR10	0.16471	5.90186	2.49471	0.0322372	0.383234	-3.52388
RAB35	-1.83971	8.84884	-2.4946	0.0322431	0.383234	-3.52404
PAEP	0.239334	6.15337	2.49426	0.0322615	0.383234	-3.52454
RAP1B	0.306196	6.20452	2.4934	0.0323088	0.383234	-3.52584
ZYX	0.34574	6.35334	2.49324	0.0323174	0.383234	-3.52608
C1orf94	-0.887488	7.47835	-2.49288	0.0323372	0.383234	-3.52662
VTI1A	0.38518	6.36709	2.49275	0.0323443	0.383234	-3.52682
NCALD	-0.189938	5.81301	-2.49111	0.0324344	0.383448	-3.52929
TAS2R43	-0.202799	5.84945	-2.49043	0.0324719	0.383448	-3.53032
UNC45A	-0.33463	6.23049	-2.4903	0.0324792	0.383448	-3.53052
UGT1A9	-0.182993	5.86869	-2.49026	0.0324815	0.383448	-3.53058
STOML2	-0.480374	6.74866	-2.4901	0.0324903	0.383448	-3.53082
POC1A	-1.49838	7.7462	-2.48993	0.0324998	0.383448	-3.53108
DUSP21	-0.488287	6.51998	-2.48864	0.032571	0.38378	-3.53302
FCGR3A	-0.334997	5.99837	-2.48834	0.0325876	0.38378	-3.53347
SLC14A1	0.669812	6.22236	2.48817	0.0325968	0.38378	-3.53372
ITCH	1.35791	9.89854	2.48766	0.0326248	0.38384	-3.53449
OXCT1	-0.175639	5.955	-2.48677	0.0326744	0.383951	-3.53584
PRPF39	0.244698	6.19506	2.48667	0.0326801	0.383951	-3.53599
CDT1	0.12678	5.8993	2.48521	0.0327609	0.3845	-3.53818
RIPPLY2	-0.137538	5.86546	-2.48471	0.0327888	0.3845	-3.53894
TNNT3	0.259045	6.23589	2.48429	0.0328122	0.3845	-3.53957
RPS6KL1	-0.70876	7.04853	-2.48385	0.0328366	0.3845	-3.54023
NMNAT1	1.17896	9.6239	2.48278	0.0328963	0.3845	-3.54184
SH3BGRL2	0.488501	6.24341	2.48203	0.0329381	0.3845	-3.54297
SCAF1	0.208955	6.09144	2.48166	0.0329591	0.3845	-3.54353
KIAA0922	-0.459335	6.19199	-2.48147	0.0329698	0.3845	-3.54382
AIFM3	0.158312	5.89157	2.48127	0.0329805	0.3845	-3.54411
MDM4	0.371408	6.32101	2.48051	0.0330231	0.3845	-3.54525
GOLGA7	0.187454	5.9084	2.4805	0.0330238	0.3845	-3.54527
MAPKAPK5	-0.168105	5.92247	-2.48032	0.033034	0.3845	-3.54555
NEFH	1.10112	6.87096	2.48026	0.0330372	0.3845	-3.54563
STRN4	-1.35296	7.693	-2.48006	0.0330483	0.3845	-3.54593
USP6NL	-0.264388	6.22572	-2.47792	0.0331689	0.385634	-3.54916
KRT24	0.235748	5.85068	2.47735	0.0332006	0.385736	-3.55001
PSIP1	-0.151663	5.76868	-2.47619	0.0332661	0.386228	-3.55176
NADSYN1	-0.269439	5.86526	-2.47265	0.0334667	0.386884	-3.5571
ANLN	-0.227267	5.65744	-2.47257	0.033471	0.386884	-3.55721
BLOC1S2	-0.845211	7.06016	-2.47247	0.0334772	0.386884	-3.55737
WDR36	-0.222757	5.94462	-2.4718	0.0335151	0.386884	-3.55838
HMX3	-0.155067	5.72152	-2.47179	0.0335158	0.386884	-3.5584
TMEM248	-0.208417	5.87199	-2.47101	0.0335601	0.386884	-3.55957
ITGA6	0.194731	6.00083	2.47048	0.0335901	0.386884	-3.56036
USP22	-2.09431	9.15912	-2.47027	0.0336024	0.386884	-3.56068
CCR6	0.480336	5.95585	2.47023	0.0336043	0.386884	-3.56073
SCO2	-0.574754	6.55986	-2.46965	0.0336375	0.386884	-3.56161
HEATR9	0.127391	5.83365	2.46925	0.0336601	0.386884	-3.56221
SMARCD1	-0.288205	6.23908	-2.46914	0.0336667	0.386884	-3.56238
ZYG11B	0.825563	6.41968	2.46893	0.0336788	0.386884	-3.5627
RPS2	1.06676	6.70521	2.46861	0.0336969	0.386884	-3.56317
DCAF4	0.201999	5.82983	2.4684	0.0337086	0.386884	-3.56348
SIPA1L3	0.679787	9.11526	2.46811	0.0337256	0.386884	-3.56393
VRK2	-0.210445	5.8138	-2.46793	0.0337355	0.386884	-3.56419
CNTN4	0.14259	6.0118	2.46788	0.0337385	0.386884	-3.56427
SLC25A10	-1.56959	8.50106	-2.46711	0.0337828	0.387127	-3.56543
PDK1	0.487958	6.54276	2.46631	0.0338289	0.387389	-3.56664
RAB9B	0.508788	6.2234	2.46487	0.0339114	0.387911	-3.5688
TRPC4AP	0.238658	6.29109	2.46449	0.0339334	0.387911	-3.56938
ART1	-0.247582	5.97813	-2.46352	0.0339892	0.387911	-3.57084
TRMT10B	0.429903	6.05359	2.46349	0.0339909	0.387911	-3.57088
MYCN	-0.145449	5.81813	-2.46312	0.034012	0.387911	-3.57143
DNAJA3	-0.717662	6.95096	-2.46296	0.0340217	0.387911	-3.57168
CD40LG	-0.115179	5.771	-2.4627	0.0340366	0.387911	-3.57207
PMS2P2	-0.231649	5.81421	-2.4621	0.0340712	0.388041	-3.57297
SLC27A3	-0.761145	6.32653	-2.46083	0.0341447	0.388491	-3.57488
C5orf49	-0.181539	5.89222	-2.46041	0.0341691	0.388491	-3.57552
MEF2C	-0.548886	6.39268	-2.46021	0.0341803	0.388491	-3.57581
CCDC144B	1.48297	7.06366	2.45926	0.0342354	0.388853	-3.57723
EFNB2	0.195791	6.14168	2.45854	0.0342773	0.388942	-3.57832
TEX2	-1.19111	7.30344	-2.45825	0.0342944	0.388942	-3.57876
ZNF442	0.169246	5.87246	2.45793	0.034313	0.388942	-3.57924
SPRR2C	-1.10142	7.93194	-2.4565	0.0343961	0.389564	-3.58139
EDAR	0.299199	6.15326	2.45595	0.0344286	0.389564	-3.58222
GGTLC1	0.250507	6.09691	2.45548	0.0344561	0.389564	-3.58293
AREG	0.147156	5.94281	2.45534	0.0344638	0.389564	-3.58313
MC5R	0.194651	6.09102	2.455	0.0344842	0.389564	-3.58365
CCDC125	-0.217252	5.69383	-2.45447	0.0345148	0.389647	-3.58444
MRPL28	-1.29956	9.13688	-2.45388	0.0345495	0.389776	-3.58533
FAM135B	0.153541	5.97523	2.45327	0.0345853	0.389917	-3.58625
CWF19L1	-0.206716	5.84377	-2.45275	0.0346157	0.389997	-3.58703
IL3RA	-0.113517	5.99036	-2.45164	0.0346809	0.390354	-3.5887
ANKRD24	-0.711521	6.59339	-2.45142	0.034694	0.390354	-3.58903
FSD1	-0.22984	6.10011	-2.44999	0.0347783	0.390501	-3.59118
PIP5K1C	-1.66877	8.23826	-2.44935	0.0348161	0.390501	-3.59214
TYROBP	-0.256884	5.86315	-2.44929	0.0348192	0.390501	-3.59222
KPNA6	0.64885	8.03495	2.4486	0.0348605	0.390501	-3.59327
MAP1LC3A	-1.09133	11.6082	-2.44817	0.0348856	0.390501	-3.59391
HHAT	-0.206776	5.82122	-2.448	0.0348959	0.390501	-3.59417
KCNMB2	0.19677	5.86902	2.44733	0.0349354	0.390501	-3.59517
MRPS2	-0.347288	6.1245	-2.44675	0.0349699	0.390501	-3.59605
GJB4	-0.166664	5.8553	-2.446	0.0350142	0.390501	-3.59717
CRIP2	-1.87544	8.88877	-2.44593	0.0350182	0.390501	-3.59727
FCGBP	-2.13939	8.30828	-2.44553	0.0350419	0.390501	-3.59787
METTL22	-0.975402	6.92156	-2.44496	0.0350761	0.390501	-3.59874
ACTR2	-1.14351	7.4173	-2.44496	0.0350763	0.390501	-3.59874
SLC5A4	0.145181	5.85147	2.44379	0.0351456	0.390501	-3.60049
LCE2B	-0.249564	6.06821	-2.44359	0.0351578	0.390501	-3.6008
SYNCRIP	-1.23455	8.52464	-2.44349	0.0351638	0.390501	-3.60095
IRF4	-0.135802	5.89494	-2.44272	0.0352099	0.390501	-3.60211
KRT4	-0.123132	5.88972	-2.44267	0.0352126	0.390501	-3.60218
THSD4	-0.234494	6.31482	-2.44258	0.0352178	0.390501	-3.60231
HSF2	-0.168144	5.81236	-2.44238	0.0352298	0.390501	-3.60261
NOMO1	-0.928088	7.32739	-2.4419	0.0352584	0.390501	-3.60333
CREB5	0.14329	5.9618	2.4418	0.0352647	0.390501	-3.60349
PAFAH2	1.44972	7.84896	2.44153	0.0352805	0.390501	-3.60389
KCNJ12	0.162062	6.09881	2.44099	0.035313	0.390501	-3.6047
WDR77	0.152835	5.86636	2.44081	0.035324	0.390501	-3.60498
UIMC1	-0.340965	6.09461	-2.44067	0.0353324	0.390501	-3.60519
EAF1	-0.140579	5.85502	-2.44059	0.0353368	0.390501	-3.6053
TBRG1	1.28587	6.51564	2.43974	0.0353877	0.390805	-3.60657
OR2H1	-1.81985	11.9523	-2.43897	0.0354343	0.390905	-3.60774
FGD4	-0.462128	6.56797	-2.43788	0.0355	0.390905	-3.60938
NCF2	-0.313408	5.9562	-2.43774	0.0355082	0.390905	-3.60958
EIF4A1	-0.191771	5.9057	-2.43767	0.0355126	0.390905	-3.60969
ALOX12B	0.163317	5.88084	2.43727	0.0355367	0.390905	-3.61029
BGN	-0.131586	5.80291	-2.43717	0.0355424	0.390905	-3.61044
ALX4	0.158037	5.98997	2.43688	0.0355601	0.390905	-3.61088
ATP11A	0.140689	5.88831	2.43598	0.0356143	0.391243	-3.61222
CA2	-0.194043	5.84615	-2.4354	0.0356494	0.391372	-3.6131
VAT1L	0.461262	6.39058	2.43472	0.0356902	0.391563	-3.61411
RRP1	0.152528	5.92841	2.43429	0.0357167	0.391597	-3.61477
UBAP1	-0.117057	6.02333	-2.43378	0.0357474	0.391678	-3.61553
TMCO1	-0.580576	6.43935	-2.43323	0.0357805	0.391783	-3.61635
CCDC96	-0.510111	6.4836	-2.43226	0.0358399	0.392177	-3.61782
CPTP	-0.98704	7.78276	-2.43182	0.035866	0.392182	-3.61846
SCP2D1	-1.70528	8.61971	-2.43132	0.0358964	0.392182	-3.61921
RSC1A1	-0.181035	5.77399	-2.43109	0.0359105	0.392182	-3.61956
ERCC8	-0.15415	5.83026	-2.43065	0.0359378	0.392207	-3.62023
DEFB118	0.210164	6.16376	2.43001	0.0359766	0.392207	-3.62119
SPRR4	0.243531	6.17863	2.42885	0.0360474	0.392207	-3.62293
MSI2	-0.177183	5.91687	-2.4287	0.0360564	0.392207	-3.62315
ZNF33A	1.00687	11.6738	2.42839	0.0360752	0.392207	-3.62361
ZNF431	0.246536	5.95526	2.42839	0.0360754	0.392207	-3.62362
TCTN2	0.448351	6.36151	2.42782	0.0361104	0.392207	-3.62448
VIMP	-0.186423	5.9287	-2.42758	0.0361252	0.392207	-3.62484
ITPA	0.120678	6.06932	2.42722	0.036147	0.392207	-3.62537
IP6K1	-0.131671	5.98013	-2.42722	0.0361472	0.392207	-3.62538
SPATA2L	0.347649	6.3855	2.42677	0.0361748	0.392253	-3.62605
TMC6	-0.171407	5.7307	-2.42416	0.0363353	0.393582	-3.62997
TAF6L	0.17298	6.17919	2.42371	0.0363629	0.393582	-3.63064
ALOX12	0.310156	6.41104	2.42363	0.0363679	0.393582	-3.63077
OR2F1	0.402427	6.42162	2.4224	0.0364438	0.393895	-3.63261
MXI1	0.38592	6.27913	2.42218	0.036457	0.393895	-3.63293
RGR	0.146187	5.82864	2.42195	0.0364713	0.393895	-3.63328
SECISBP2L	0.221975	6.39939	2.42124	0.0365155	0.393895	-3.63435
NAGA	-0.502329	6.23611	-2.42067	0.0365505	0.393895	-3.6352
COX7C	-1.33009	7.85322	-2.4202	0.0365796	0.393895	-3.6359
ZNF391	-0.161426	5.87148	-2.4201	0.0365861	0.393895	-3.63606
DEFB127	0.257707	6.13494	2.41939	0.0366302	0.393895	-3.63713
TMEM18	0.227865	6.31097	2.41931	0.036635	0.393895	-3.63724
NOLC1	-0.396693	6.05075	-2.41898	0.0366551	0.393895	-3.63773
LHX1	0.146163	5.82552	2.41873	0.036671	0.393895	-3.63811
RPL21	0.142095	5.99944	2.4186	0.0366792	0.393895	-3.63831
LRRC26	0.774607	7.37537	2.41756	0.0367436	0.394334	-3.63986
PSMD13	1.39208	8.22845	2.41573	0.0368576	0.395175	-3.64261
HYPM	-0.530287	6.47418	-2.41555	0.0368692	0.395175	-3.64288
ST13	0.132882	5.9301	2.41444	0.0369386	0.395295	-3.64455
SPAG9	-0.876548	8.49309	-2.41441	0.0369406	0.395295	-3.6446
DBN1	0.43459	6.69043	2.41424	0.0369512	0.395295	-3.64485
FMC1	-1.27997	10.0615	-2.41298	0.0370299	0.395611	-3.64673
UHRF2	-0.375018	6.49524	-2.41288	0.0370364	0.395611	-3.64689
KHDRBS3	-0.682682	7.05232	-2.41263	0.0370516	0.395611	-3.64725
C19orf24	-0.7876	7.24175	-2.41213	0.0370834	0.395657	-3.64801
ARL16	0.85904	6.58117	2.41181	0.0371032	0.395657	-3.64848
PTOV1	-1.31602	8.4482	-2.41106	0.0371506	0.39591	-3.64961
UBXN2A	0.764609	6.84689	2.41034	0.037196	0.395982	-3.65069
SIMC1	0.204012	5.98468	2.40981	0.0372294	0.395982	-3.65149
PIAS4	-1.1372	8.65121	-2.40973	0.0372346	0.395982	-3.65161
RAB3IP	-1.04401	11.4459	-2.40945	0.0372519	0.395982	-3.65202
SH2D5	-0.107753	5.98122	-2.40764	0.0373665	0.396267	-3.65474
RTKN2	0.224156	5.94198	2.40751	0.0373747	0.396267	-3.65493
CSF1R	-0.277138	6.20778	-2.40722	0.0373932	0.396267	-3.65537
DISC1	-0.243044	6.02304	-2.40716	0.037397	0.396267	-3.65546
CDC26	-1.03311	6.72188	-2.40672	0.0374246	0.396267	-3.65611
IAPP	0.166164	5.96103	2.4063	0.0374514	0.396267	-3.65674
HSPBAP1	-0.179445	5.87207	-2.40612	0.0374628	0.396267	-3.65701
ILF3	-0.323599	6.01998	-2.40604	0.0374681	0.396267	-3.65714
SPATA20	-0.705585	8.22147	-2.40516	0.0375239	0.396585	-3.65845
SNAPC4	-0.87539	7.64054	-2.40444	0.0375697	0.396585	-3.65953
LEPROT	0.549239	6.16037	2.40353	0.0376274	0.396585	-3.66089
PML	-0.114359	5.78965	-2.40294	0.0376653	0.396585	-3.66178
SEMA6B	0.256975	6.21334	2.40277	0.0376759	0.396585	-3.66203
ERBB3	0.21578	6.1446	2.40248	0.0376948	0.396585	-3.66247
SLC16A11	0.243721	6.25467	2.40233	0.0377043	0.396585	-3.6627
XKR4	1.16705	6.80147	2.40198	0.0377265	0.396585	-3.66322
NDUFS8	-1.19174	8.48616	-2.40151	0.0377565	0.396585	-3.66392
MAD2L2	-1.59262	8.5758	-2.40151	0.0377566	0.396585	-3.66392
WDR13	-1.02349	6.99794	-2.40148	0.0377587	0.396585	-3.66397
PHF24	0.323056	6.28853	2.40062	0.0378135	0.396593	-3.66525
TRIT1	-0.123439	5.82239	-2.40059	0.0378154	0.396593	-3.6653
ZNF831	-0.185319	5.82393	-2.39934	0.0378957	0.396593	-3.66717
HLA-DPB1	-1.64614	7.35942	-2.39933	0.037896	0.396593	-3.66718
C17orf77	0.193639	6.07667	2.39909	0.0379116	0.396593	-3.66754
PRDM4	-0.359811	6.27454	-2.39904	0.0379145	0.396593	-3.66761
HSFY2	-1.00883	7.53186	-2.39848	0.037951	0.396593	-3.66846
DGCR14	-0.285061	6.06185	-2.39823	0.037967	0.396593	-3.66884
ELK4	0.246978	6.14776	2.39783	0.0379926	0.396593	-3.66943
TCEAL3	0.301526	6.12412	2.39777	0.0379963	0.396593	-3.66952
ZCCHC16	0.234632	6.09487	2.39624	0.0380951	0.397305	-3.67181
CDK2AP1	-1.41654	7.78991	-2.39569	0.0381306	0.397305	-3.67264
RARRES2	-0.163772	5.97071	-2.39561	0.0381357	0.397305	-3.67276
ACOT13	-0.165909	5.98275	-2.3943	0.0382207	0.397789	-3.67472
INPP5E	-0.379689	6.2396	-2.39385	0.0382499	0.397789	-3.6754
CDKN1B	0.166245	6.35659	2.39351	0.0382716	0.397789	-3.6759
PEBP4	0.138766	5.94179	2.39268	0.0383252	0.397789	-3.67714
HIST1H1B	0.1499	5.78138	2.3926	0.0383303	0.397789	-3.67725
DENND3	-0.15952	5.89441	-2.39224	0.038354	0.397789	-3.6778
COA4	-0.231123	5.86837	-2.39163	0.0383935	0.397789	-3.67871
CCDC191	0.101428	5.89606	2.39149	0.0384025	0.397789	-3.67892
FAM3B	-0.119463	5.79716	-2.39129	0.0384155	0.397789	-3.67922
BRD8	-0.216546	5.91499	-2.39123	0.0384198	0.397789	-3.67932
UBE2B	0.619937	6.59116	2.39073	0.0384521	0.397877	-3.68006
LIPA	-0.164166	5.96136	-2.3901	0.0384933	0.398057	-3.68101
PEF1	-0.20693	6.19062	-2.38889	0.0385725	0.398531	-3.68282
RP9	0.139634	5.91216	2.38867	0.0385867	0.398531	-3.68315
GYPB	0.101533	5.98384	2.3881	0.0386235	0.398615	-3.68399
SNIP1	-0.145381	5.82687	-2.38652	0.038727	0.398615	-3.68636
KLF17	1.00638	6.46385	2.38648	0.0387297	0.398615	-3.68642
CSF1	0.662775	6.23414	2.38646	0.038731	0.398615	-3.68645
RXFP1	-0.185278	5.90707	-2.38603	0.0387595	0.398615	-3.6871
MED1	0.904904	6.39398	2.38454	0.0388574	0.398615	-3.68932
TNIK	0.137095	6.04937	2.38433	0.038871	0.398615	-3.68964
PSMC1	-1.12769	11.7764	-2.38374	0.0389097	0.398615	-3.69051
ZFAND2B	-0.174704	5.91987	-2.38349	0.0389262	0.398615	-3.69089
ZCCHC5	-0.121934	5.75561	-2.38348	0.0389268	0.398615	-3.6909
PLOD3	-0.178645	5.78014	-2.3834	0.038932	0.398615	-3.69102
TMEM165	0.161201	5.88473	2.38329	0.0389398	0.398615	-3.6912
BEND6	-0.561615	6.10273	-2.38322	0.0389443	0.398615	-3.6913
PDIA2	-0.1861	5.73476	-2.38272	0.0389774	0.398615	-3.69205
HM13	0.172336	6.13181	2.38224	0.039009	0.398615	-3.69277
ARMC6	-1.31823	7.71515	-2.38211	0.0390175	0.398615	-3.69296
BLOC1S5	-0.277686	6.01293	-2.38186	0.0390336	0.398615	-3.69332
CCNJL	0.129044	5.83178	2.3817	0.0390444	0.398615	-3.69357
DPY19L4	0.172636	5.98841	2.38154	0.0390551	0.398615	-3.69381
PTGIS	0.15711	5.88248	2.3813	0.039071	0.398615	-3.69417
TRAF5	0.228956	6.21117	2.37986	0.0391664	0.399145	-3.69632
TOR1AIP2	0.131237	5.89035	2.37954	0.0391877	0.399145	-3.6968
OAZ1	-1.3405	12.0143	-2.37891	0.0392295	0.399145	-3.69775
ZIC5	0.272967	6.12682	2.37879	0.0392371	0.399145	-3.69792
CXCL14	0.31628	6.43789	2.3783	0.0392698	0.399145	-3.69865
AGBL4	2.15339	8.10111	2.37818	0.0392778	0.399145	-3.69883
CRTC2	-0.438546	6.39289	-2.37795	0.0392928	0.399145	-3.69917
PHOSPHO1	-0.593333	6.92076	-2.37713	0.0393479	0.399145	-3.70041
ERMP1	-0.389688	6.53904	-2.3764	0.0393964	0.399145	-3.70149
C4A	-0.123173	5.94437	-2.37631	0.0394022	0.399145	-3.70162
MITD1	-0.174965	5.63067	-2.37529	0.0394704	0.399145	-3.70315
EIF2B1	0.398526	6.50303	2.37483	0.039501	0.399145	-3.70384
OR1D5	0.179847	5.93589	2.37481	0.0395025	0.399145	-3.70387
TAAR2	0.245175	6.20995	2.37477	0.0395049	0.399145	-3.70392
PDGFRB	-0.189991	5.84136	-2.37308	0.0396183	0.399145	-3.70646
RASAL3	-0.613097	6.46833	-2.3728	0.0396374	0.399145	-3.70688
ACTG2	-0.304574	6.32598	-2.3725	0.0396573	0.399145	-3.70732
FKBP15	0.15326	5.87821	2.37198	0.039692	0.399145	-3.7081
FCGR2C	0.209033	5.87326	2.37182	0.0397029	0.399145	-3.70834
USP8	-0.19875	5.90246	-2.3718	0.0397041	0.399145	-3.70837
PPFIA3	0.355268	6.41846	2.37176	0.039707	0.399145	-3.70843
FABP5	-0.174885	5.86638	-2.37165	0.0397145	0.399145	-3.7086
SCPEP1	-0.162556	5.81291	-2.37079	0.0397723	0.399145	-3.70988
ZNF688	-0.635397	6.6155	-2.37079	0.0397725	0.399145	-3.70989
MPST	-0.139195	5.8302	-2.37054	0.0397887	0.399145	-3.71025
CD82	0.150979	5.84113	2.3704	0.0397986	0.399145	-3.71046
SAG	-1.24904	7.52769	-2.36968	0.0398469	0.399145	-3.71154
IWS1	0.161663	5.79747	2.36958	0.0398534	0.399145	-3.71168
DSN1	1.18252	7.46476	2.36957	0.0398547	0.399145	-3.71171
LEFTY2	-0.34256	6.33008	-2.36947	0.039861	0.399145	-3.71185
PRDM13	0.559006	6.48099	2.36918	0.0398808	0.399145	-3.71229
GATA5	-0.46902	6.41886	-2.36837	0.0399355	0.399145	-3.7135
ZRANB2	-0.180614	5.88613	-2.36823	0.0399446	0.399145	-3.7137
NEMF	0.134878	5.81572	2.36777	0.0399759	0.399145	-3.71439
LMF2	-1.20919	9.01186	-2.36755	0.0399906	0.399145	-3.71471
MMRN1	-0.176924	5.80138	-2.36727	0.04001	0.399145	-3.71514
UBE2V2	-0.390234	6.30861	-2.36663	0.0400532	0.399145	-3.71609
PDIA5	-0.190543	5.95017	-2.36646	0.0400645	0.399145	-3.71634
GTF2F2	-0.219416	5.84451	-2.36577	0.0401117	0.399145	-3.71738
B3GNT6	0.136496	6.00921	2.36576	0.0401124	0.399145	-3.7174
PRSS2	0.259208	6.06703	2.3652	0.0401502	0.399145	-3.71823
LECT1	-0.112061	5.82998	-2.36502	0.0401623	0.399145	-3.7185
HSDL1	0.614139	6.43504	2.3648	0.0401775	0.399145	-3.71883
LGI1	-0.114929	5.78224	-2.36429	0.0402123	0.399145	-3.71959
MUS81	-0.590084	8.71767	-2.3642	0.0402182	0.399145	-3.71972
DBT	0.834292	6.38835	2.36418	0.0402197	0.399145	-3.71976
RCVRN	0.244043	6.40133	2.36184	0.0403792	0.399924	-3.72325
PLLP	0.17698	5.99601	2.36163	0.0403936	0.399924	-3.72356
ZNF234	0.734905	6.31981	2.36147	0.0404042	0.399924	-3.7238
PPM1K	-0.169522	5.84046	-2.36117	0.0404246	0.399924	-3.72424
NSL1	1.22297	7.2654	2.36106	0.0404324	0.399924	-3.72441
GDPD3	-0.918606	8.92589	-2.36092	0.0404422	0.399924	-3.72463
HIST1H4I	0.220127	5.98575	2.36058	0.0404654	0.399924	-3.72513
LDHA	-0.261041	5.94993	-2.35965	0.0405289	0.400134	-3.72652
DUS2	-0.991606	7.26875	-2.35934	0.0405501	0.400134	-3.72698
SP140	0.486462	6.93994	2.35921	0.0405588	0.400134	-3.72717
AP4B1	0.157214	5.99766	2.35878	0.0405882	0.400134	-3.72781
KAT6A	0.896306	6.36919	2.35806	0.0406382	0.400134	-3.72889
RBM3	1.16332	6.6001	2.3576	0.0406696	0.400134	-3.72957
RPP38	0.186138	6.02279	2.35753	0.0406747	0.400134	-3.72969
ITGB6	0.147003	5.95827	2.35748	0.0406778	0.400134	-3.72975
CBARP	-0.26946	5.90324	-2.35569	0.0408011	0.401111	-3.73242
CA1	0.151929	5.91467	2.35514	0.0408389	0.401205	-3.73324
RASA2	-0.179446	5.86019	-2.35486	0.0408586	0.401205	-3.73367
CNP	0.22239	5.94918	2.35446	0.0408861	0.40124	-3.73426
PTER	0.704374	6.30671	2.35249	0.0410226	0.402233	-3.7372
SLC26A2	0.1142	5.89393	2.35172	0.0410761	0.402233	-3.73835
PI4KB	-0.155781	5.9696	-2.35151	0.0410904	0.402233	-3.73866
ELSPBP1	-0.118839	5.76142	-2.35115	0.0411154	0.402233	-3.73919
STRAP	-0.164416	5.87268	-2.3509	0.0411334	0.402233	-3.73958
TLR5	-0.282316	5.88273	-2.35068	0.0411483	0.402233	-3.7399
ERRFI1	-0.108943	6.02505	-2.35017	0.0411839	0.402233	-3.74066
DMRTA1	-0.164903	5.82873	-2.3501	0.0411891	0.402233	-3.74077
ATXN7L1	0.264317	5.96826	2.34988	0.0412044	0.402233	-3.7411
ADAL	0.311991	6.15177	2.34909	0.0412594	0.402233	-3.74228
DXO	-0.44401	6.38633	-2.34887	0.0412749	0.402233	-3.74261
FUT8	0.140584	5.81339	2.34886	0.0412756	0.402233	-3.74262
TCEA3	0.48871	6.01593	2.34746	0.0413732	0.402694	-3.74471
FAM46C	-1.81303	10.4883	-2.34735	0.041381	0.402694	-3.74487
RAPGEF4	-0.136175	5.74746	-2.34715	0.041395	0.402694	-3.74517
SSNA1	0.546951	6.79866	2.34608	0.0414699	0.403187	-3.74676
RIT1	-0.177187	5.84589	-2.3444	0.0415879	0.4033	-3.74927
DGKD	-0.57033	6.63587	-2.34426	0.0415976	0.4033	-3.74947
VPS53	-0.236758	6.05695	-2.34395	0.0416191	0.4033	-3.74993
TSPAN18	0.334736	6.22924	2.3439	0.041623	0.4033	-3.75001
RNF133	-0.944492	7.19842	-2.34357	0.0416458	0.4033	-3.7505
MARCKSL1	-0.618447	6.72082	-2.34305	0.0416824	0.4033	-3.75127
PCDHGA1	-0.20224	5.72871	-2.343	0.041686	0.4033	-3.75135
FOS	-0.305456	6.14582	-2.34297	0.0416882	0.4033	-3.75139
GTPBP6	0.245813	6.18461	2.34258	0.0417159	0.4033	-3.75198
KIF2C	-0.351942	6.32547	-2.34157	0.041787	0.4033	-3.75348
A4GALT	0.118612	5.89669	2.34156	0.0417876	0.4033	-3.75349
PRAME	-0.199126	6.1375	-2.34128	0.0418077	0.4033	-3.75392
HIF1AN	0.286099	6.432	2.34126	0.0418088	0.4033	-3.75394
NIPSNAP1	0.274098	6.2038	2.34112	0.0418187	0.4033	-3.75415
KIZ	-0.470951	6.36657	-2.34062	0.041854	0.403408	-3.75489
LRRC43	-0.288288	6.23421	-2.33939	0.0419415	0.404019	-3.75674
SLC25A29	-0.298282	6.10787	-2.33877	0.0419851	0.404029	-3.75765
ZNF827	0.771192	6.42735	2.33869	0.0419909	0.404029	-3.75777
PDCL2	-0.14717	5.83574	-2.33798	0.0420411	0.404052	-3.75883
MRPL52	0.500035	6.43028	2.33763	0.0420666	0.404052	-3.75936
CCNG1	0.149582	5.93506	2.33736	0.0420858	0.404052	-3.75976
DLK1	0.156897	5.99717	2.3373	0.0420898	0.404052	-3.75985
TMEM40	0.346232	6.28581	2.33677	0.0421274	0.404181	-3.76063
SPACA3	-0.470655	6.17601	-2.33643	0.0421515	0.404181	-3.76114
THEM4	1.04011	6.71559	2.3359	0.0421897	0.404316	-3.76193
WWC1	0.341054	5.98261	2.33543	0.0422228	0.404401	-3.76263
VENTX	0.442305	6.22289	2.33501	0.042253	0.404459	-3.76326
NTRK1	-0.13528	5.816	-2.33455	0.0422862	0.404546	-3.76395
MRPL12	-1.42332	8.76804	-2.33272	0.0424172	0.404901	-3.76667
MRPL15	-0.176017	6.03906	-2.33169	0.0424909	0.404901	-3.76821
SUV39H1	0.534354	6.41172	2.33123	0.0425238	0.404901	-3.76889
NHLH2	0.18355	5.92937	2.33116	0.0425287	0.404901	-3.76899
PDE6G	0.409059	6.19239	2.33025	0.0425943	0.404901	-3.77035
DDHD2	-0.125246	5.86288	-2.3299	0.0426198	0.404901	-3.77087
ARID2	-0.651713	6.58331	-2.32963	0.0426388	0.404901	-3.77127
CA10	0.428422	6.26225	2.32962	0.0426395	0.404901	-3.77128
NCAPG2	-0.145842	5.96503	-2.32937	0.0426574	0.404901	-3.77165
ITIH6	0.356195	6.10176	2.32937	0.0426577	0.404901	-3.77166
TOR3A	0.523653	6.32492	2.32916	0.0426725	0.404901	-3.77196
FSIP2	1.61972	6.9659	2.32882	0.0426971	0.404901	-3.77247
NSRP1	0.717822	6.34208	2.32875	0.0427025	0.404901	-3.77258
GPS1	-1.12864	7.50297	-2.32862	0.0427116	0.404901	-3.77277
DUS3L	-0.33896	5.94215	-2.32826	0.0427374	0.404901	-3.7733
AP5Z1	0.769229	6.56631	2.32813	0.0427474	0.404901	-3.77351
FYB	0.337165	6.19896	2.32797	0.0427586	0.404901	-3.77374
CNN2	0.385677	6.51731	2.32722	0.0428126	0.404901	-3.77485
MTERF1	-0.141703	5.85829	-2.32675	0.0428468	0.404901	-3.77555
RPLP2	0.261351	6.76177	2.32667	0.0428525	0.404901	-3.77567
CYP4F8	0.231183	5.95684	2.32613	0.0428916	0.404901	-3.77647
LRP8	0.317079	6.06857	2.32541	0.0429438	0.404901	-3.77755
DLAT	0.301816	6.12227	2.32504	0.0429706	0.404901	-3.77809
GLTP	0.38584	5.99611	2.32491	0.0429802	0.404901	-3.77829
DLC1	-0.250269	6.2575	-2.32475	0.0429919	0.404901	-3.77853
KDELC2	0.133374	5.77469	2.3243	0.0430246	0.404901	-3.7792
LRP4	0.147751	6.03918	2.32394	0.0430508	0.404901	-3.77974
CALCRL	0.512799	7.26566	2.32364	0.0430727	0.404901	-3.78019
ASPH	-0.17097	5.68165	-2.32241	0.0431625	0.404901	-3.78202
MAST4	-1.60949	10.6703	-2.32229	0.0431711	0.404901	-3.7822
RXRB	-0.200489	5.96118	-2.322	0.0431921	0.404901	-3.78262
P2RY4	0.160068	5.87915	2.32178	0.0432083	0.404901	-3.78295
GDF15	-0.24265	6.15054	-2.32147	0.0432306	0.404901	-3.78341
SIRPB1	0.357765	6.75059	2.32139	0.0432367	0.404901	-3.78353
TCEANC2	0.491253	6.41265	2.3211	0.0432579	0.404901	-3.78396
TRHR	0.146611	5.74304	2.32084	0.0432765	0.404901	-3.78434
ECHDC1	-0.150063	5.94695	-2.3206	0.0432944	0.404901	-3.78471
ANKFY1	-0.271167	5.91022	-2.3197	0.0433601	0.404901	-3.78604
CDYL	0.21941	6.03147	2.31966	0.0433633	0.404901	-3.78611
CAMP	-1.50605	8.29479	-2.31953	0.0433728	0.404901	-3.7863
SLC2A1	-0.185301	5.80116	-2.31936	0.0433851	0.404901	-3.78655
TROVE2	-0.390232	6.32092	-2.31894	0.043416	0.404901	-3.78718
TRMT2A	0.132016	5.89028	2.31889	0.0434199	0.404901	-3.78726
OR2T33	-0.149205	5.93006	-2.31887	0.0434213	0.404901	-3.78728
TEX101	-0.852354	6.49644	-2.31885	0.0434222	0.404901	-3.7873
SLBP	0.112811	5.88086	2.31867	0.0434358	0.404901	-3.78758
CMTM7	0.134664	5.91185	2.31758	0.0435161	0.405239	-3.78921
SEC14L1	0.191206	6.48643	2.31752	0.0435205	0.405239	-3.78929
RP2	0.355272	6.12922	2.31656	0.0435905	0.405374	-3.79071
SUPT16H	0.215919	5.93516	2.3158	0.0436469	0.405374	-3.79185
PUS7	-0.163156	5.76088	-2.31567	0.0436566	0.405374	-3.79204
SLC36A3	0.223422	6.27309	2.3156	0.0436616	0.405374	-3.79214
MFAP4	0.394075	6.60666	2.31466	0.0437311	0.405374	-3.79355
OR1F1	-0.230537	6.05133	-2.31465	0.0437313	0.405374	-3.79355
NCLN	-0.208454	5.92734	-2.31441	0.0437494	0.405374	-3.79391
ZNF785	0.571133	6.2883	2.31438	0.0437519	0.405374	-3.79396
GBP5	-0.176906	5.92633	-2.31377	0.0437969	0.405374	-3.79487
MACROD2	0.350337	6.17879	2.31353	0.0438146	0.405374	-3.79522
AS3MT	0.145023	5.85831	2.31344	0.0438212	0.405374	-3.79536
CDK11B	-0.27476	6.2034	-2.31334	0.0438284	0.405374	-3.7955
KRT8	0.934963	7.15358	2.31305	0.0438497	0.405374	-3.79593
ACSM4	-0.229166	5.96093	-2.31217	0.0439149	0.405521	-3.79724
ACAA2	-0.649653	6.42211	-2.31198	0.0439289	0.405521	-3.79752
TBC1D10B	-0.98076	7.37072	-2.31186	0.0439383	0.405521	-3.79771
KIF11	-0.134862	5.66258	-2.30974	0.0440956	0.406318	-3.80085
C1orf27	0.776091	6.39759	2.30948	0.0441153	0.406318	-3.80124
PDE1C	-0.147136	5.82338	-2.30913	0.0441411	0.406318	-3.80176
DCTN5	0.173208	5.84253	2.30886	0.0441615	0.406318	-3.80217
[truncated: 14,924 more rows]
