# Supplementary material for: One potential biomarker for teratozoospermia identified by in-depth integrative analysis of multiple microarray data
Source: Aging (Albany NY). 2021 Mar 26;13(7):10208–24. doi: 10.18632/aging.202781 (PMC8064145; doi:10.18632/aging.202781)
Supplement: Supplementary Table 2 [file aging-13-202781-s003.xls]

## Sheet: Annotation
Supplementary Table 2. The GO enrichment analysis summary table based on 89 common DEGs.
MyList	Gene ID	Type	Tax ID	Homologene Gene ID	Homologene Gene Tax ID	GO:0006413 translational initiation	GO:0043154 negative regulation of cystein	GO:0001654 eye development	GO:0060349 bone morphogenesis	GO:0019216 regulation of lipid metabolic	GO:1901990 regulation of mitotic cell cyc	GO:0050839 cell adhesion molecule binding	GO:0006119 oxidative phosphorylation	GO:0005766 primary lysosome	GO:0016925 protein sumoylation	GO:0021953 central nervous system neuron	GO:0045664 regulation of neuron different	GO:0045727 positive regulation of transla
AGBL4	84871	symbol	H. sapiens	84871	H. sapiens	0	0	0	0	0	1	0	0	0	0	1	0	0
BCL11A	53335	symbol	H. sapiens	53335	H. sapiens	0	0	0	0	0	0	0	0	0	1	0	1	0
CDH9	1007	symbol	H. sapiens	1007	H. sapiens	1	0	0	0	0	0	1	0	0	0	0	0	0
CPED1	79974	symbol	H. sapiens	79974	H. sapiens	0	0	0	0	0	0	0	0	0	0	0	0	0
CPSF2	53981	symbol	H. sapiens	53981	H. sapiens	0	0	0	0	0	0	0	0	0	0	0	0	0
CREB5	9586	symbol	H. sapiens	9586	H. sapiens	0	0	0	0	0	0	0	0	0	0	0	0	0
CYP4A11	1579	symbol	H. sapiens	1579	H. sapiens	0	0	0	0	1	0	0	0	0	0	0	0	0
DIP2B	57609	symbol	H. sapiens	57609	H. sapiens	0	0	0	0	0	0	0	0	0	0	0	0	0
DNAJC30	84277	symbol	H. sapiens	84277	H. sapiens	0	0	0	0	0	1	0	1	0	0	0	0	0
ECE2	9718	symbol	H. sapiens	9718	H. sapiens	0	0	0	0	0	1	0	0	0	0	0	0	0
FAM172A	83989	symbol	H. sapiens	83989	H. sapiens	0	0	0	0	0	0	0	0	0	0	0	0	0
FSD2	123722	symbol	H. sapiens	123722	H. sapiens	0	0	0	0	0	0	0	0	0	0	0	0	0
GNL3L	54552	symbol	H. sapiens	54552	H. sapiens	1	1	0	0	0	0	0	0	0	1	0	0	0
HECW2	57520	symbol	H. sapiens	57520	H. sapiens	0	0	0	0	0	1	0	0	0	0	0	1	0
IFNE	338376	symbol	H. sapiens	338376	H. sapiens	0	1	0	0	0	0	0	0	0	0	0	0	0
IHH	3549	symbol	H. sapiens	3549	H. sapiens	0	0	1	1	0	1	0	0	0	0	0	0	0
KLHDC7A	127707	symbol	H. sapiens	127707	H. sapiens	0	0	0	0	0	0	0	0	0	0	0	0	0
KRTAP17-1	83902	symbol	H. sapiens	83902	H. sapiens	0	0	0	0	0	0	0	0	0	0	0	0	0
KXD1	79036	symbol	H. sapiens	79036	H. sapiens	1	0	0	0	0	0	0	0	1	0	0	0	0
MDGA1	266727	symbol	H. sapiens	266727	H. sapiens	0	0	0	0	0	0	0	0	0	0	1	0	0
MEGF10	84466	symbol	H. sapiens	84466	H. sapiens	0	0	0	0	0	0	0	0	0	0	0	0	0
MZT2B	80097	symbol	H. sapiens	80097	H. sapiens	0	0	0	0	0	0	0	0	0	0	0	0	0
OPCML	4978	symbol	H. sapiens	4978	H. sapiens	0	0	0	0	0	0	0	0	0	0	0	0	0
PAQR4	124222	symbol	H. sapiens	124222	H. sapiens	0	0	0	0	0	0	0	0	0	0	0	0	0
RARB	5915	symbol	H. sapiens	5915	H. sapiens	0	0	1	1	0	0	0	0	0	0	0	1	0
RUNDC3B	154661	symbol	H. sapiens	154661	H. sapiens	0	0	0	0	0	0	0	0	0	0	0	0	0
SFRP2	6423	symbol	H. sapiens	6423	H. sapiens	0	1	0	1	0	1	1	0	0	0	1	1	0
SLC30A2	7780	symbol	H. sapiens	7780	H. sapiens	0	0	0	0	0	0	0	0	1	0	0	0	0
SLITRK6	84189	symbol	H. sapiens	84189	H. sapiens	0	0	1	0	0	0	0	0	0	0	0	0	0
TMEM17	200728	symbol	H. sapiens	200728	H. sapiens	0	0	0	0	0	0	0	0	0	0	0	0	0
WDR86	349136	symbol	H. sapiens	349136	H. sapiens	0	0	0	0	0	0	0	0	0	0	0	0	0
ZNF287	57336	symbol	H. sapiens	57336	H. sapiens	0	0	0	0	0	0	0	0	0	0	0	0	0
ABI2	10152	symbol	H. sapiens	10152	H. sapiens	1	0	1	0	0	0	0	0	0	1	0	1	0
ADIPOR1	51094	symbol	H. sapiens	51094	H. sapiens	0	0	0	0	1	1	0	0	0	1	0	1	0
C12orf57	113246	symbol	H. sapiens	113246	H. sapiens	0	0	1	0	1	0	0	0	0	0	1	0	0
CCNL2	81669	symbol	H. sapiens	81669	H. sapiens	0	0	0	0	0	0	0	0	0	0	0	0	0
CCNYL1	151195	symbol	H. sapiens	151195	H. sapiens	0	0	0	0	0	0	0	0	0	1	0	0	0
COX16	51241	symbol	H. sapiens	51241	H. sapiens	0	0	0	0	0	0	0	0	0	0	0	0	0
COX7C	1350	symbol	H. sapiens	1350	H. sapiens	0	0	0	0	0	0	0	1	0	0	0	0	0
DAP3	7818	symbol	H. sapiens	7818	H. sapiens	1	0	0	0	0	0	0	0	0	0	0	0	0
DBI	1622	symbol	H. sapiens	1622	H. sapiens	0	1	0	0	0	0	0	1	0	0	0	0	0
DHRS3	9249	symbol	H. sapiens	9249	H. sapiens	0	0	0	1	0	0	0	1	0	0	0	0	0
DHX32	55760	symbol	H. sapiens	55760	H. sapiens	0	0	0	0	0	0	0	0	0	0	0	0	0
DUSP22	56940	symbol	H. sapiens	56940	H. sapiens	0	1	1	0	0	0	0	0	0	1	0	0	0
DYNC1H1	1778	symbol	H. sapiens	1778	H. sapiens	1	0	0	0	0	1	0	0	1	0	0	0	0
EIF3D	8664	symbol	H. sapiens	8664	H. sapiens	1	0	0	0	0	0	0	0	0	0	0	0	1
EIF3K	27335	symbol	H. sapiens	27335	H. sapiens	1	0	0	0	0	0	0	0	0	0	0	0	0
EPSTI1	94240	symbol	H. sapiens	94240	H. sapiens	0	0	0	0	0	0	0	0	0	0	0	0	0
FAM160B1	57700	symbol	H. sapiens	57700	H. sapiens	0	0	0	0	0	0	0	0	0	0	0	0	0
FDFT1	2222	symbol	H. sapiens	2222	H. sapiens	0	0	0	0	1	1	0	0	0	0	0	0	0
HINT1	3094	symbol	H. sapiens	3094	H. sapiens	1	1	0	0	0	0	0	1	0	1	0	0	0
IFT57	55081	symbol	H. sapiens	55081	H. sapiens	0	1	0	1	0	1	0	0	0	0	0	0	0
JARID2	3720	symbol	H. sapiens	3720	H. sapiens	0	1	0	0	1	0	0	0	0	0	0	1	0
KLF4	9314	symbol	H. sapiens	9314	H. sapiens	0	1	1	0	1	1	0	0	0	0	0	1	0
LRBA	987	symbol	H. sapiens	987	H. sapiens	0	0	0	0	0	0	0	0	1	1	0	0	0
MFSD1	64747	symbol	H. sapiens	64747	H. sapiens	0	0	0	0	0	0	0	0	0	0	0	0	0
MTMR4	9110	symbol	H. sapiens	9110	H. sapiens	0	0	0	0	1	0	0	0	0	0	0	0	0
NDUFA4	4697	symbol	H. sapiens	4697	H. sapiens	0	0	0	0	0	0	0	1	0	0	0	0	0
NPC2	10577	symbol	H. sapiens	10577	H. sapiens	0	0	0	0	1	0	0	0	1	0	0	0	0
PARK7	11315	symbol	H. sapiens	11315	H. sapiens	1	1	0	0	0	1	1	1	0	1	0	0	0
PFDN5	5204	symbol	H. sapiens	5204	H. sapiens	0	0	1	0	0	1	0	0	0	0	0	0	0
POLR2F	5435	symbol	H. sapiens	5435	H. sapiens	1	0	0	0	0	0	0	0	0	0	0	0	0
PRDX6	9588	symbol	H. sapiens	9588	H. sapiens	0	0	0	0	0	0	1	0	1	0	0	0	0
PSMA7	5688	symbol	H. sapiens	5688	H. sapiens	1	0	0	0	0	1	0	0	0	0	0	0	0
PSMB1	5689	symbol	H. sapiens	5689	H. sapiens	1	0	0	0	0	1	0	0	0	0	0	0	0
RBL2	5934	symbol	H. sapiens	5934	H. sapiens	0	0	0	0	1	1	0	0	0	0	0	0	0
RFX5	5993	symbol	H. sapiens	5993	H. sapiens	0	0	0	0	0	0	0	0	0	0	0	0	0
RNPEP	6051	symbol	H. sapiens	6051	H. sapiens	0	0	0	0	0	1	0	0	0	0	0	0	0
RPL24	6152	symbol	H. sapiens	6152	H. sapiens	1	0	0	0	0	0	1	0	0	0	0	0	0
RPL27	6155	symbol	H. sapiens	6155	H. sapiens	1	0	0	0	0	0	0	0	0	0	0	0	0
RPL29	6159	symbol	H. sapiens	6159	H. sapiens	1	0	0	0	0	0	1	0	0	0	0	0	0
RPL31	6160	symbol	H. sapiens	6160	H. sapiens	1	0	0	0	0	0	0	0	0	0	0	0	0
RPL32	6161	symbol	H. sapiens	6161	H. sapiens	1	0	0	0	0	0	0	0	0	0	0	0	0
RPL35	11224	symbol	H. sapiens	11224	H. sapiens	1	0	0	0	0	0	0	0	0	0	0	0	0
RPS10	6204	symbol	H. sapiens	6204	H. sapiens	1	0	0	0	0	0	0	0	0	0	0	0	0
RPS18	6222	symbol	H. sapiens	6222	H. sapiens	1	0	0	0	0	0	0	0	0	0	0	0	0
RPS4X	6191	symbol	H. sapiens	6191	H. sapiens	1	0	0	0	0	0	0	0	0	0	0	0	1
RPS5	6193	symbol	H. sapiens	6193	H. sapiens	1	0	0	0	0	0	0	0	0	0	0	0	0
RPUSD4	84881	symbol	H. sapiens	84881	H. sapiens	1	0	0	0	0	0	0	0	0	0	0	0	1
SAR1B	51128	symbol	H. sapiens	51128	H. sapiens	0	0	0	0	0	1	0	0	1	0	0	0	0
SARNP	84324	symbol	H. sapiens	84324	H. sapiens	1	0	0	0	0	0	0	0	0	0	0	0	0
SNX3	8724	symbol	H. sapiens	8724	H. sapiens	0	0	0	0	0	1	0	0	1	0	0	1	0
SURF4	6836	symbol	H. sapiens	6836	H. sapiens	0	0	0	0	0	0	0	0	1	0	0	0	0
TMEM117	84216	symbol	H. sapiens	84216	H. sapiens	0	1	0	0	0	0	0	0	0	0	0	0	0
TNS3	64759	symbol	H. sapiens	64759	H. sapiens	1	0	0	0	0	0	0	0	0	0	0	0	0
TSPAN8	7103	symbol	H. sapiens	7103	H. sapiens	0	0	0	0	0	0	1	0	0	0	0	0	0
TTYH2	94015	symbol	H. sapiens	94015	H. sapiens	0	0	0	0	0	0	0	0	0	0	0	0	0
USP47	55031	symbol	H. sapiens	55031	H. sapiens	0	1	0	0	0	1	0	0	0	0	0	0	0
UVRAG	7405	symbol	H. sapiens	7405	H. sapiens	0	0	0	0	0	1	0	0	1	0	0	0	0

## Sheet: Enrichment
GroupID	Category	Term	Description	LogP	Log(q-value)	InTerm_InList	Genes	Symbols
1_Summary	GO Biological Processes	GO:0006413	translational initiation	-11.9402	-7.99307	12/192	6152,6155,6159,6160,6161,6191,6193,6204,6222,8664,11224,27335,5435,7818,79036,5688,5689,84324,84881,3094,1778,54552,1007,10152,11315,64759	RPL24,RPL27,RPL29,RPL31,RPL32,RPS4X,RPS5,RPS10,RPS18,EIF3D,RPL35,EIF3K,POLR2F,DAP3,KXD1,PSMA7,PSMB1,SARNP,RPUSD4,HINT1,DYNC1H1,GNL3L,CDH9,ABI2,PARK7,TNS3
1_Member	GO Biological Processes	GO:0006413	translational initiation	-11.9402	-7.99307	12/192	6152,6155,6159,6160,6161,6191,6193,6204,6222,8664,11224,27335	RPL24,RPL27,RPL29,RPL31,RPL32,RPS4X,RPS5,RPS10,RPS18,EIF3D,RPL35,EIF3K
1_Member	GO Biological Processes	GO:0019080	viral gene expression	-11.8603	-7.99307	12/195	5435,6152,6155,6159,6160,6161,6191,6193,6204,6222,8664,11224	POLR2F,RPL24,RPL27,RPL29,RPL31,RPL32,RPS4X,RPS5,RPS10,RPS18,EIF3D,RPL35
1_Member	GO Biological Processes	GO:0006614	SRP-dependent cotranslational protein targeting to membrane	-11.8498	-7.99307	10/105	6152,6155,6159,6160,6161,6191,6193,6204,6222,11224	RPL24,RPL27,RPL29,RPL31,RPL32,RPS4X,RPS5,RPS10,RPS18,RPL35
1_Member	GO Biological Processes	GO:0006613	cotranslational protein targeting to membrane	-11.6847	-7.99307	10/109	6152,6155,6159,6160,6161,6191,6193,6204,6222,11224	RPL24,RPL27,RPL29,RPL31,RPL32,RPS4X,RPS5,RPS10,RPS18,RPL35
1_Member	GO Cellular Components	GO:0022626	cytosolic ribosome	-11.6444	-7.99307	10/110	6152,6155,6159,6160,6161,6191,6193,6204,6222,11224	RPL24,RPL27,RPL29,RPL31,RPL32,RPS4X,RPS5,RPS10,RPS18,RPL35
1_Member	GO Biological Processes	GO:0000184	nuclear-transcribed mRNA catabolic process, nonsense-mediated decay	-11.262	-7.75681	10/120	6152,6155,6159,6160,6161,6191,6193,6204,6222,11224	RPL24,RPL27,RPL29,RPL31,RPL32,RPS4X,RPS5,RPS10,RPS18,RPL35
1_Member	GO Biological Processes	GO:0045047	protein targeting to ER	-11.262	-7.75681	10/120	6152,6155,6159,6160,6161,6191,6193,6204,6222,11224	RPL24,RPL27,RPL29,RPL31,RPL32,RPS4X,RPS5,RPS10,RPS18,RPL35
1_Member	GO Biological Processes	GO:0072599	establishment of protein localization to endoplasmic reticulum	-11.1185	-7.67132	10/124	6152,6155,6159,6160,6161,6191,6193,6204,6222,11224	RPL24,RPL27,RPL29,RPL31,RPL32,RPS4X,RPS5,RPS10,RPS18,RPL35
1_Member	GO Biological Processes	GO:0019083	viral transcription	-10.9224	-7.52634	11/178	5435,6152,6155,6159,6160,6161,6191,6193,6204,6222,11224	POLR2F,RPL24,RPL27,RPL29,RPL31,RPL32,RPS4X,RPS5,RPS10,RPS18,RPL35
1_Member	GO Cellular Components	GO:0044391	ribosomal subunit	-10.6901	-7.33977	11/187	6152,6155,6159,6160,6161,6191,6193,6204,6222,7818,11224	RPL24,RPL27,RPL29,RPL31,RPL32,RPS4X,RPS5,RPS10,RPS18,DAP3,RPL35
1_Member	GO Molecular Functions	GO:0003735	structural constituent of ribosome	-10.3283	-7.01942	11/202	6152,6155,6159,6160,6161,6191,6193,6204,6222,7818,11224	RPL24,RPL27,RPL29,RPL31,RPL32,RPS4X,RPS5,RPS10,RPS18,DAP3,RPL35
1_Member	GO Biological Processes	GO:0070972	protein localization to endoplasmic reticulum	-10.2352	-6.96403	10/152	6152,6155,6159,6160,6161,6191,6193,6204,6222,11224	RPL24,RPL27,RPL29,RPL31,RPL32,RPS4X,RPS5,RPS10,RPS18,RPL35
1_Member	GO Cellular Components	GO:0044445	cytosolic part	-9.35834	-6.12198	11/249	6152,6155,6159,6160,6161,6191,6193,6204,6222,11224,79036	RPL24,RPL27,RPL29,RPL31,RPL32,RPS4X,RPS5,RPS10,RPS18,RPL35,KXD1
1_Member	GO Cellular Components	GO:0005840	ribosome	-8.98728	-5.7831	11/270	6152,6155,6159,6160,6161,6191,6193,6204,6222,7818,11224	RPL24,RPL27,RPL29,RPL31,RPL32,RPS4X,RPS5,RPS10,RPS18,DAP3,RPL35
1_Member	GO Biological Processes	GO:0006612	protein targeting to membrane	-8.8594	-5.68519	10/210	6152,6155,6159,6160,6161,6191,6193,6204,6222,11224	RPL24,RPL27,RPL29,RPL31,RPL32,RPS4X,RPS5,RPS10,RPS18,RPL35
1_Member	GO Biological Processes	GO:0000956	nuclear-transcribed mRNA catabolic process	-8.81957	-5.67338	10/212	6152,6155,6159,6160,6161,6191,6193,6204,6222,11224	RPL24,RPL27,RPL29,RPL31,RPL32,RPS4X,RPS5,RPS10,RPS18,RPL35
1_Member	GO Biological Processes	GO:0006402	mRNA catabolic process	-8.52771	-5.40785	12/379	5688,5689,6152,6155,6159,6160,6161,6191,6193,6204,6222,11224	PSMA7,PSMB1,RPL24,RPL27,RPL29,RPL31,RPL32,RPS4X,RPS5,RPS10,RPS18,RPL35
1_Member	GO Biological Processes	GO:0006401	RNA catabolic process	-8.05343	-4.95839	12/418	5688,5689,6152,6155,6159,6160,6161,6191,6193,6204,6222,11224	PSMA7,PSMB1,RPL24,RPL27,RPL29,RPL31,RPL32,RPS4X,RPS5,RPS10,RPS18,RPL35
1_Member	GO Biological Processes	GO:0006412	translation	-7.94234	-4.87078	15/739	6152,6155,6159,6160,6161,6191,6193,6204,6222,7818,8664,11224,27335,84324,84881	RPL24,RPL27,RPL29,RPL31,RPL32,RPS4X,RPS5,RPS10,RPS18,DAP3,EIF3D,RPL35,EIF3K,SARNP,RPUSD4
1_Member	GO Biological Processes	GO:0043043	peptide biosynthetic process	-7.75097	-4.70169	15/764	6152,6155,6159,6160,6161,6191,6193,6204,6222,7818,8664,11224,27335,84324,84881	RPL24,RPL27,RPL29,RPL31,RPL32,RPS4X,RPS5,RPS10,RPS18,DAP3,EIF3D,RPL35,EIF3K,SARNP,RPUSD4
1_Member	GO Cellular Components	GO:0022625	cytosolic large ribosomal subunit	-7.51082	-4.48274	6/58	6152,6155,6159,6160,6161,11224	RPL24,RPL27,RPL29,RPL31,RPL32,RPL35
1_Member	GO Biological Processes	GO:0090150	establishment of protein localization to membrane	-6.8288	-3.82091	10/344	6152,6155,6159,6160,6161,6191,6193,6204,6222,11224	RPL24,RPL27,RPL29,RPL31,RPL32,RPS4X,RPS5,RPS10,RPS18,RPL35
1_Member	GO Biological Processes	GO:0034655	nucleobase-containing compound catabolic process	-6.67022	-3.68164	13/674	3094,5688,5689,6152,6155,6159,6160,6161,6191,6193,6204,6222,11224	HINT1,PSMA7,PSMB1,RPL24,RPL27,RPL29,RPL31,RPL32,RPS4X,RPS5,RPS10,RPS18,RPL35
1_Member	GO Biological Processes	GO:0046700	heterocycle catabolic process	-6.29802	-3.33894	13/727	3094,5688,5689,6152,6155,6159,6160,6161,6191,6193,6204,6222,11224	HINT1,PSMA7,PSMB1,RPL24,RPL27,RPL29,RPL31,RPL32,RPS4X,RPS5,RPS10,RPS18,RPL35
1_Member	GO Biological Processes	GO:0044270	cellular nitrogen compound catabolic process	-6.29131	-3.33894	13/728	3094,5688,5689,6152,6155,6159,6160,6161,6191,6193,6204,6222,11224	HINT1,PSMA7,PSMB1,RPL24,RPL27,RPL29,RPL31,RPL32,RPS4X,RPS5,RPS10,RPS18,RPL35
1_Member	GO Biological Processes	GO:0019439	aromatic compound catabolic process	-6.21158	-3.27625	13/740	3094,5688,5689,6152,6155,6159,6160,6161,6191,6193,6204,6222,11224	HINT1,PSMA7,PSMB1,RPL24,RPL27,RPL29,RPL31,RPL32,RPS4X,RPS5,RPS10,RPS18,RPL35
1_Member	GO Biological Processes	GO:0002181	cytoplasmic translation	-6.01238	-3.09344	6/103	6152,6159,6160,6161,8664,27335	RPL24,RPL29,RPL31,RPL32,EIF3D,EIF3K
1_Member	GO Biological Processes	GO:1901361	organic cyclic compound catabolic process	-5.97505	-3.07191	13/777	3094,5688,5689,6152,6155,6159,6160,6161,6191,6193,6204,6222,11224	HINT1,PSMA7,PSMB1,RPL24,RPL27,RPL29,RPL31,RPL32,RPS4X,RPS5,RPS10,RPS18,RPL35
1_Member	GO Biological Processes	GO:0006605	protein targeting	-5.81954	-2.93164	10/444	6152,6155,6159,6160,6161,6191,6193,6204,6222,11224	RPL24,RPL27,RPL29,RPL31,RPL32,RPS4X,RPS5,RPS10,RPS18,RPL35
1_Member	GO Cellular Components	GO:0015934	large ribosomal subunit	-5.70966	-2.83647	6/116	6152,6155,6159,6160,6161,11224	RPL24,RPL27,RPL29,RPL31,RPL32,RPL35
1_Member	GO Cellular Components	GO:0015935	small ribosomal subunit	-5.40573	-2.54679	5/74	6191,6193,6204,6222,7818	RPS4X,RPS5,RPS10,RPS18,DAP3
1_Member	GO Biological Processes	GO:0022613	ribonucleoprotein complex biogenesis	-5.2193	-2.37415	10/519	1778,6152,6155,6193,6204,8664,11224,27335,54552,84881	DYNC1H1,RPL24,RPL27,RPS5,RPS10,EIF3D,RPL35,EIF3K,GNL3L,RPUSD4
1_Member	GO Cellular Components	GO:0005912	adherens junction	-4.97271	-2.14092	10/554	1007,6155,6160,6191,6193,6204,6222,10152,11315,64759	CDH9,RPL27,RPL31,RPS4X,RPS5,RPS10,RPS18,ABI2,PARK7,TNS3
1_Member	GO Biological Processes	GO:0072594	establishment of protein localization to organelle	-4.91224	-2.09341	10/563	6152,6155,6159,6160,6161,6191,6193,6204,6222,11224	RPL24,RPL27,RPL29,RPL31,RPL32,RPS4X,RPS5,RPS10,RPS18,RPL35
1_Member	GO Cellular Components	GO:0070161	anchoring junction	-4.86599	-2.05976	10/570	1007,6155,6160,6191,6193,6204,6222,10152,11315,64759	CDH9,RPL27,RPL31,RPS4X,RPS5,RPS10,RPS18,ABI2,PARK7,TNS3
1_Member	GO Cellular Components	GO:0022627	cytosolic small ribosomal subunit	-4.81432	-2.02032	4/47	6191,6193,6204,6222	RPS4X,RPS5,RPS10,RPS18
1_Member	GO Molecular Functions	GO:0005198	structural molecule activity	-4.497	-1.71489	11/767	6152,6155,6159,6160,6161,6191,6193,6204,6222,7818,11224	RPL24,RPL27,RPL29,RPL31,RPL32,RPS4X,RPS5,RPS10,RPS18,DAP3,RPL35
1_Member	GO Biological Processes	GO:0072657	protein localization to membrane	-4.35872	-1.58819	10/654	6152,6155,6159,6160,6161,6191,6193,6204,6222,11224	RPL24,RPL27,RPL29,RPL31,RPL32,RPS4X,RPS5,RPS10,RPS18,RPL35
1_Member	GO Biological Processes	GO:0042254	ribosome biogenesis	-4.2182	-1.45895	7/310	6152,6155,6193,6204,11224,54552,84881	RPL24,RPL27,RPS5,RPS10,RPL35,GNL3L,RPUSD4
1_Member	GO Cellular Components	GO:0005844	polysome	-4.15201	-1.40377	4/69	6152,6160,6161,6191	RPL24,RPL31,RPL32,RPS4X
1_Member	GO Cellular Components	GO:0042788	polysomal ribosome	-3.84128	-1.10376	3/32	6152,6160,6161	RPL24,RPL31,RPL32
1_Member	GO Biological Processes	GO:0022618	ribonucleoprotein complex assembly	-3.51916	-0.850093	6/285	1778,6152,6193,6204,8664,27335	DYNC1H1,RPL24,RPS5,RPS10,EIF3D,EIF3K
1_Member	GO Cellular Components	GO:0005925	focal adhesion	-3.42162	-0.761509	7/418	6155,6160,6191,6193,6204,6222,64759	RPL27,RPL31,RPS4X,RPS5,RPS10,RPS18,TNS3
1_Member	GO Biological Processes	GO:0071826	ribonucleoprotein complex subunit organization	-3.40847	-0.760311	6/299	1778,6152,6193,6204,8664,27335	DYNC1H1,RPL24,RPS5,RPS10,EIF3D,EIF3K
1_Member	GO Cellular Components	GO:0005924	cell-substrate adherens junction	-3.40305	-0.760311	7/421	6155,6160,6191,6193,6204,6222,64759	RPL27,RPL31,RPS4X,RPS5,RPS10,RPS18,TNS3
1_Member	GO Cellular Components	GO:0030055	cell-substrate junction	-3.37244	-0.738135	7/426	6155,6160,6191,6193,6204,6222,64759	RPL27,RPL31,RPS4X,RPS5,RPS10,RPS18,TNS3
1_Member	GO Molecular Functions	GO:0019843	rRNA binding	-2.94888	-0.390963	3/64	6191,6193,6222	RPS4X,RPS5,RPS18
1_Member	GO Biological Processes	GO:0042255	ribosome assembly	-2.89124	-0.354981	3/67	6152,6193,6204	RPL24,RPS5,RPS10
2_Summary	GO Biological Processes	GO:0043154	negative regulation of cysteine-type endopeptidase activity involved in apoptotic process	-3.79921	-1.07216	4/85	6423,9314,11315,55031,55081,3094,84216,1622,3720,54552,56940,338376	SFRP2,KLF4,PARK7,USP47,IFT57,HINT1,TMEM117,DBI,JARID2,GNL3L,DUSP22,IFNE
2_Member	GO Biological Processes	GO:0043154	negative regulation of cysteine-type endopeptidase activity involved in apoptotic process	-3.79921	-1.07216	4/85	6423,9314,11315,55031	SFRP2,KLF4,PARK7,USP47
2_Member	GO Biological Processes	GO:2000117	negative regulation of cysteine-type endopeptidase activity	-3.64865	-0.936939	4/93	6423,9314,11315,55031	SFRP2,KLF4,PARK7,USP47
2_Member	GO Biological Processes	GO:0043281	regulation of cysteine-type endopeptidase activity involved in apoptotic process	-3.17537	-0.573254	5/218	6423,9314,11315,55031,55081	SFRP2,KLF4,PARK7,USP47,IFT57
2_Member	GO Biological Processes	GO:2000116	regulation of cysteine-type endopeptidase activity	-2.9724	-0.403757	5/242	6423,9314,11315,55031,55081	SFRP2,KLF4,PARK7,USP47,IFT57
2_Member	GO Biological Processes	GO:0097193	intrinsic apoptotic signaling pathway	-2.62804	-0.202018	5/290	3094,6423,11315,55031,84216	HINT1,SFRP2,PARK7,USP47,TMEM117
2_Member	GO Biological Processes	GO:2001243	negative regulation of intrinsic apoptotic signaling pathway	-2.42024	-0.0877498	3/98	6423,11315,55031	SFRP2,PARK7,USP47
2_Member	GO Biological Processes	GO:0031400	negative regulation of protein modification process	-2.36074	-0.0591779	7/641	1622,3720,6423,9314,11315,54552,56940	DBI,JARID2,SFRP2,KLF4,PARK7,GNL3L,DUSP22
2_Member	GO Biological Processes	GO:0033138	positive regulation of peptidyl-serine phosphorylation	-2.29116	-0.0151433	3/109	6423,11315,338376	SFRP2,PARK7,IFNE
2_Member	GO Biological Processes	GO:0010951	negative regulation of endopeptidase activity	-2.02984	0	4/258	6423,9314,11315,55031	SFRP2,KLF4,PARK7,USP47
3_Summary	GO Biological Processes	GO:0001654	eye development	-3.64379	-0.936939	7/384	3549,5204,5915,9314,10152,84189,113246,56940	IHH,PFDN5,RARB,KLF4,ABI2,SLITRK6,C12orf57,DUSP22
3_Member	GO Biological Processes	GO:0001654	eye development	-3.64379	-0.936939	7/384	3549,5204,5915,9314,10152,84189,113246	IHH,PFDN5,RARB,KLF4,ABI2,SLITRK6,C12orf57
3_Member	GO Biological Processes	GO:0150063	visual system development	-3.61648	-0.928929	7/388	3549,5204,5915,9314,10152,84189,113246	IHH,PFDN5,RARB,KLF4,ABI2,SLITRK6,C12orf57
3_Member	GO Biological Processes	GO:0048880	sensory system development	-3.57612	-0.897909	7/394	3549,5204,5915,9314,10152,84189,113246	IHH,PFDN5,RARB,KLF4,ABI2,SLITRK6,C12orf57
3_Member	GO Biological Processes	GO:0043010	camera-type eye development	-3.20402	-0.594075	6/327	3549,5204,9314,10152,84189,113246	IHH,PFDN5,KLF4,ABI2,SLITRK6,C12orf57
3_Member	GO Biological Processes	GO:0048592	eye morphogenesis	-2.80448	-0.313238	4/156	3549,5915,10152,113246	IHH,RARB,ABI2,C12orf57
3_Member	GO Biological Processes	GO:0090596	sensory organ morphogenesis	-2.76991	-0.300422	5/269	3549,5915,10152,84189,113246	IHH,RARB,ABI2,SLITRK6,C12orf57
3_Member	GO Biological Processes	GO:0007423	sensory organ development	-2.60729	-0.18917	7/578	3549,5204,5915,9314,10152,84189,113246	IHH,PFDN5,RARB,KLF4,ABI2,SLITRK6,C12orf57
3_Member	GO Biological Processes	GO:0002064	epithelial cell development	-2.22817	0	4/226	3549,5915,10152,84189	IHH,RARB,ABI2,SLITRK6
3_Member	GO Biological Processes	GO:0048593	camera-type eye morphogenesis	-2.19575	0	3/118	3549,10152,113246	IHH,ABI2,C12orf57
3_Member	GO Biological Processes	GO:1903038	negative regulation of leukocyte cell-cell adhesion	-2.01841	0	3/137	3549,9314,56940	IHH,KLF4,DUSP22
4_Summary	GO Biological Processes	GO:0060349	bone morphogenesis	-3.63081	-0.933716	4/94	3549,5915,6423,9249,55081	IHH,RARB,SFRP2,DHRS3,IFT57
4_Member	GO Biological Processes	GO:0060349	bone morphogenesis	-3.63081	-0.933716	4/94	3549,5915,6423,9249	IHH,RARB,SFRP2,DHRS3
4_Member	GO Biological Processes	GO:0003007	heart morphogenesis	-2.84207	-0.343018	5/259	3549,5915,6423,9249,55081	IHH,RARB,SFRP2,DHRS3,IFT57
4_Member	GO Biological Processes	GO:0003151	outflow tract morphogenesis	-2.65447	-0.217976	3/81	5915,6423,9249	RARB,SFRP2,DHRS3
4_Member	GO Biological Processes	GO:0060348	bone development	-2.38448	-0.0676024	4/204	3549,5915,6423,9249	IHH,RARB,SFRP2,DHRS3
4_Member	GO Biological Processes	GO:0002062	chondrocyte differentiation	-2.29116	-0.0151433	3/109	3549,5915,6423	IHH,RARB,SFRP2
4_Member	GO Biological Processes	GO:0048705	skeletal system morphogenesis	-2.21484	0	4/228	3549,5915,6423,9249	IHH,RARB,SFRP2,DHRS3
4_Member	GO Biological Processes	GO:0030326	embryonic limb morphogenesis	-2.10807	0	3/127	3549,5915,6423	IHH,RARB,SFRP2
4_Member	GO Biological Processes	GO:0035113	embryonic appendage morphogenesis	-2.10807	0	3/127	3549,5915,6423	IHH,RARB,SFRP2
4_Member	GO Biological Processes	GO:0003206	cardiac chamber morphogenesis	-2.07129	0	3/131	5915,6423,9249	RARB,SFRP2,DHRS3
4_Member	GO Biological Processes	GO:0048565	digestive tract development	-2.03574	0	3/135	3549,5915,6423	IHH,RARB,SFRP2
5_Summary	GO Biological Processes	GO:0019216	regulation of lipid metabolic process	-3.34225	-0.716224	7/431	1579,2222,5934,9110,9314,10577,51094,3720,113246	CYP4A11,FDFT1,RBL2,MTMR4,KLF4,NPC2,ADIPOR1,JARID2,C12orf57
5_Member	GO Biological Processes	GO:0019216	regulation of lipid metabolic process	-3.34225	-0.716224	7/431	1579,2222,5934,9110,9314,10577,51094	CYP4A11,FDFT1,RBL2,MTMR4,KLF4,NPC2,ADIPOR1
5_Member	GO Biological Processes	GO:0043502	regulation of muscle adaptation	-2.37155	-0.0626352	3/102	3720,9110,9314	JARID2,MTMR4,KLF4
5_Member	GO Biological Processes	GO:0090257	regulation of muscle system process	-2.04137	0	4/256	3720,9110,9314,113246	JARID2,MTMR4,KLF4,C12orf57
6_Summary	GO Biological Processes	GO:1901990	regulation of mitotic cell cycle phase transition	-3.24267	-0.624759	7/448	1778,5688,5689,5934,9314,55031,57520,5204,6423,3549,6051,9718,11315,84871,8724,51128,51094,7405,2222,84277,55081	DYNC1H1,PSMA7,PSMB1,RBL2,KLF4,USP47,HECW2,PFDN5,SFRP2,IHH,RNPEP,ECE2,PARK7,AGBL4,SNX3,SAR1B,ADIPOR1,UVRAG,FDFT1,DNAJC30,IFT57
6_Member	GO Biological Processes	GO:1901990	regulation of mitotic cell cycle phase transition	-3.24267	-0.624759	7/448	1778,5688,5689,5934,9314,55031,57520	DYNC1H1,PSMA7,PSMB1,RBL2,KLF4,USP47,HECW2
6_Member	GO Biological Processes	GO:0060070	canonical Wnt signaling pathway	-3.12254	-0.528108	6/339	5204,5688,5689,6423,9314,55031	PFDN5,PSMA7,PSMB1,SFRP2,KLF4,USP47
6_Member	GO Biological Processes	GO:1901987	regulation of cell cycle phase transition	-3.03563	-0.448752	7/486	1778,5688,5689,5934,9314,55031,57520	DYNC1H1,PSMA7,PSMB1,RBL2,KLF4,USP47,HECW2
6_Member	GO Molecular Functions	GO:0008233	peptidase activity	-3.02475	-0.445292	8/635	3549,5688,5689,6051,9718,11315,55031,84871	IHH,PSMA7,PSMB1,RNPEP,ECE2,PARK7,USP47,AGBL4
6_Member	GO Biological Processes	GO:0006521	regulation of cellular amino acid metabolic process	-2.96873	-0.403757	3/63	5688,5689,11315	PSMA7,PSMB1,PARK7
6_Member	GO Biological Processes	GO:1901991	negative regulation of mitotic cell cycle phase transition	-2.90214	-0.354981	5/251	5688,5689,5934,9314,55031	PSMA7,PSMB1,RBL2,KLF4,USP47
6_Member	GO Biological Processes	GO:0030111	regulation of Wnt signaling pathway	-2.8912	-0.354981	6/376	5204,5688,5689,6423,8724,55031	PFDN5,PSMA7,PSMB1,SFRP2,SNX3,USP47
6_Member	GO Biological Processes	GO:0090263	positive regulation of canonical Wnt signaling pathway	-2.86702	-0.354981	4/150	5688,5689,6423,55031	PSMA7,PSMB1,SFRP2,USP47
6_Member	GO Biological Processes	GO:0016055	Wnt signaling pathway	-2.86644	-0.354981	7/520	5204,5688,5689,6423,8724,9314,55031	PFDN5,PSMA7,PSMB1,SFRP2,SNX3,KLF4,USP47
6_Member	GO Biological Processes	GO:0198738	cell-cell signaling by wnt	-2.85691	-0.351704	7/522	5204,5688,5689,6423,8724,9314,55031	PFDN5,PSMA7,PSMB1,SFRP2,SNX3,KLF4,USP47
6_Member	GO Biological Processes	GO:1901988	negative regulation of cell cycle phase transition	-2.76287	-0.299056	5/270	5688,5689,5934,9314,55031	PSMA7,PSMB1,RBL2,KLF4,USP47
6_Member	GO Biological Processes	GO:0016579	protein deubiquitination	-2.66733	-0.220109	5/284	5688,5689,8724,11315,55031	PSMA7,PSMB1,SNX3,PARK7,USP47
6_Member	GO Biological Processes	GO:0033238	regulation of cellular amine metabolic process	-2.65447	-0.217976	3/81	5688,5689,11315	PSMA7,PSMB1,PARK7
6_Member	GO Biological Processes	GO:0002478	antigen processing and presentation of exogenous peptide antigen	-2.60498	-0.18917	4/177	1778,5688,5689,51128	DYNC1H1,PSMA7,PSMB1,SAR1B
6_Member	GO Biological Processes	GO:0060828	regulation of canonical Wnt signaling pathway	-2.59603	-0.185244	5/295	5204,5688,5689,6423,55031	PFDN5,PSMA7,PSMB1,SFRP2,USP47
6_Member	GO Biological Processes	GO:0070646	protein modification by small protein removal	-2.55845	-0.162502	5/301	5688,5689,8724,11315,55031	PSMA7,PSMB1,SNX3,PARK7,USP47
6_Member	GO Biological Processes	GO:0030177	positive regulation of Wnt signaling pathway	-2.55283	-0.162502	4/183	5688,5689,6423,55031	PSMA7,PSMB1,SFRP2,USP47
6_Member	GO Biological Processes	GO:0090090	negative regulation of canonical Wnt signaling pathway	-2.54433	-0.162502	4/184	5204,5688,5689,6423	PFDN5,PSMA7,PSMB1,SFRP2
6_Member	GO Biological Processes	GO:0019884	antigen processing and presentation of exogenous antigen	-2.53587	-0.158696	4/185	1778,5688,5689,51128	DYNC1H1,PSMA7,PSMB1,SAR1B
6_Member	GO Biological Processes	GO:0044772	mitotic cell cycle phase transition	-2.50947	-0.141438	7/602	1778,5688,5689,5934,9314,55031,57520	DYNC1H1,PSMA7,PSMB1,RBL2,KLF4,USP47,HECW2
6_Member	GO Biological Processes	GO:0010565	regulation of cellular ketone metabolic process	-2.50258	-0.139043	4/189	5688,5689,11315,51094	PSMA7,PSMB1,PARK7,ADIPOR1
6_Member	GO Biological Processes	GO:0048002	antigen processing and presentation of peptide antigen	-2.46206	-0.107391	4/194	1778,5688,5689,51128	DYNC1H1,PSMA7,PSMB1,SAR1B
6_Member	GO Biological Processes	GO:0010972	negative regulation of G2/M transition of mitotic cell cycle	-2.44541	-0.0951048	3/96	5688,5689,55031	PSMA7,PSMB1,USP47
6_Member	GO Biological Processes	GO:0010564	regulation of cell cycle process	-2.43138	-0.0896723	8/791	1778,5688,5689,5934,7405,9314,55031,57520	DYNC1H1,PSMA7,PSMB1,RBL2,UVRAG,KLF4,USP47,HECW2
6_Member	GO Biological Processes	GO:0010389	regulation of G2/M transition of mitotic cell cycle	-2.41498	-0.0877498	4/200	1778,5688,5689,55031	DYNC1H1,PSMA7,PSMB1,USP47
6_Member	GO Biological Processes	GO:1905114	cell surface receptor signaling pathway involved in cell-cell signaling	-2.41275	-0.0877498	7/627	5204,5688,5689,6423,8724,9314,55031	PFDN5,PSMA7,PSMB1,SFRP2,SNX3,KLF4,USP47
6_Member	GO Biological Processes	GO:0002474	antigen processing and presentation of peptide antigen via MHC class I	-2.40787	-0.0869472	3/99	5688,5689,51128	PSMA7,PSMB1,SAR1B
6_Member	GO Biological Processes	GO:0062012	regulation of small molecule metabolic process	-2.36027	-0.0591779	6/481	2222,5688,5689,11315,51094,84277	FDFT1,PSMA7,PSMB1,PARK7,ADIPOR1,DNAJC30
6_Member	GO Biological Processes	GO:0044770	cell cycle phase transition	-2.33889	-0.0416657	7/647	1778,5688,5689,5934,9314,55031,57520	DYNC1H1,PSMA7,PSMB1,RBL2,KLF4,USP47,HECW2
6_Member	GO Biological Processes	GO:0045930	negative regulation of mitotic cell cycle	-2.32863	-0.0352284	5/341	5688,5689,5934,9314,55031	PSMA7,PSMB1,RBL2,KLF4,USP47
6_Member	GO Biological Processes	GO:0060071	Wnt signaling pathway, planar cell polarity pathway	-2.30229	-0.0164404	3/108	5688,5689,6423	PSMA7,PSMB1,SFRP2
6_Member	GO Biological Processes	GO:1902750	negative regulation of cell cycle G2/M phase transition	-2.30229	-0.0164404	3/108	5688,5689,55031	PSMA7,PSMB1,USP47
6_Member	GO Biological Processes	GO:1902749	regulation of cell cycle G2/M phase transition	-2.2899	-0.0151433	4/217	1778,5688,5689,55031	DYNC1H1,PSMA7,PSMB1,USP47
6_Member	GO Biological Processes	GO:0090175	regulation of establishment of planar polarity	-2.28014	-0.00901031	3/110	5688,5689,6423	PSMA7,PSMB1,SFRP2
6_Member	GO Biological Processes	GO:0030178	negative regulation of Wnt signaling pathway	-2.269	-0.00505434	4/220	5204,5688,5689,6423	PFDN5,PSMA7,PSMB1,SFRP2
6_Member	GO Biological Processes	GO:0007346	regulation of mitotic cell cycle	-2.25411	0	7/671	1778,5688,5689,5934,9314,55031,57520	DYNC1H1,PSMA7,PSMB1,RBL2,KLF4,USP47,HECW2
6_Member	GO Biological Processes	GO:0010948	negative regulation of cell cycle process	-2.23553	0	5/359	5688,5689,5934,9314,55031	PSMA7,PSMB1,RBL2,KLF4,USP47
6_Member	GO Biological Processes	GO:0019882	antigen processing and presentation	-2.18857	0	4/232	1778,5688,5689,51128	DYNC1H1,PSMA7,PSMB1,SAR1B
6_Member	GO Biological Processes	GO:0001736	establishment of planar polarity	-2.13651	0	3/124	5688,5689,6423	PSMA7,PSMB1,SFRP2
6_Member	GO Biological Processes	GO:0007164	establishment of tissue polarity	-2.13651	0	3/124	5688,5689,6423	PSMA7,PSMB1,SFRP2
6_Member	GO Biological Processes	GO:0044106	cellular amine metabolic process	-2.06229	0	3/132	5688,5689,11315	PSMA7,PSMB1,PARK7
6_Member	GO Biological Processes	GO:0002009	morphogenesis of an epithelium	-2.05882	0	6/557	3549,5688,5689,6423,9314,55081	IHH,PSMA7,PSMB1,SFRP2,KLF4,IFT57
6_Member	GO Biological Processes	GO:0000086	G2/M transition of mitotic cell cycle	-2.05301	0	4/254	1778,5688,5689,55031	DYNC1H1,PSMA7,PSMB1,USP47
6_Member	GO Biological Processes	GO:0042180	cellular ketone metabolic process	-2.01842	0	4/260	5688,5689,11315,51094	PSMA7,PSMB1,PARK7,ADIPOR1
7_Summary	GO Molecular Functions	GO:0050839	cell adhesion molecule binding	-2.88563	-0.354981	7/516	1007,6152,6159,6423,7103,9588,11315	CDH9,RPL24,RPL29,SFRP2,TSPAN8,PRDX6,PARK7
7_Member	GO Molecular Functions	GO:0050839	cell adhesion molecule binding	-2.88563	-0.354981	7/516	1007,6152,6159,6423,7103,9588,11315	CDH9,RPL24,RPL29,SFRP2,TSPAN8,PRDX6,PARK7
7_Member	GO Molecular Functions	GO:0045296	cadherin binding	-2.37193	-0.0626352	5/333	1007,6152,6159,9588,11315	CDH9,RPL24,RPL29,PRDX6,PARK7
8_Summary	GO Biological Processes	GO:0006119	oxidative phosphorylation	-2.87772	-0.354981	4/149	1350,4697,11315,84277,9249,1622,3094	COX7C,NDUFA4,PARK7,DNAJC30,DHRS3,DBI,HINT1
8_Member	GO Biological Processes	GO:0006119	oxidative phosphorylation	-2.87772	-0.354981	4/149	1350,4697,11315,84277	COX7C,NDUFA4,PARK7,DNAJC30
8_Member	GO Biological Processes	GO:1902600	proton transmembrane transport	-2.7742	-0.300422	4/159	1350,4697,11315,84277	COX7C,NDUFA4,PARK7,DNAJC30
8_Member	GO Biological Processes	GO:0022900	electron transport chain	-2.54433	-0.162502	4/184	1350,4697,9249,11315	COX7C,NDUFA4,DHRS3,PARK7
8_Member	GO Biological Processes	GO:0042775	mitochondrial ATP synthesis coupled electron transport	-2.43276	-0.0896723	3/97	1350,4697,11315	COX7C,NDUFA4,PARK7
8_Member	GO Biological Processes	GO:0042773	ATP synthesis coupled electron transport	-2.42024	-0.0877498	3/98	1350,4697,11315	COX7C,NDUFA4,PARK7
8_Member	GO Molecular Functions	GO:0009055	electron transfer activity	-2.26922	-0.00505434	3/111	1350,4697,9249	COX7C,NDUFA4,DHRS3
8_Member	GO Biological Processes	GO:0022904	respiratory electron transport chain	-2.21624	0	3/116	1350,4697,11315	COX7C,NDUFA4,PARK7
8_Member	GO Biological Processes	GO:0009150	purine ribonucleotide metabolic process	-2.09538	0	6/547	1350,1622,3094,4697,11315,84277	COX7C,DBI,HINT1,NDUFA4,PARK7,DNAJC30
8_Member	GO Biological Processes	GO:0009259	ribonucleotide metabolic process	-2.04085	0	6/562	1350,1622,3094,4697,11315,84277	COX7C,DBI,HINT1,NDUFA4,PARK7,DNAJC30
9_Summary	GO Cellular Components	GO:0005766	primary lysosome	-2.79431	-0.313238	4/157	1778,6836,9588,10577,987,7405,7780,79036,8724,51128	DYNC1H1,SURF4,PRDX6,NPC2,LRBA,UVRAG,SLC30A2,KXD1,SNX3,SAR1B
9_Member	GO Cellular Components	GO:0005766	primary lysosome	-2.79431	-0.313238	4/157	1778,6836,9588,10577	DYNC1H1,SURF4,PRDX6,NPC2
9_Member	GO Cellular Components	GO:0042582	azurophil granule	-2.79431	-0.313238	4/157	1778,6836,9588,10577	DYNC1H1,SURF4,PRDX6,NPC2
9_Member	GO Cellular Components	GO:0000323	lytic vacuole	-2.70321	-0.25053	8/714	987,1778,6836,7405,7780,9588,10577,79036	LRBA,DYNC1H1,SURF4,UVRAG,SLC30A2,PRDX6,NPC2,KXD1
9_Member	GO Cellular Components	GO:0005764	lysosome	-2.70321	-0.25053	8/714	987,1778,6836,7405,7780,9588,10577,79036	LRBA,DYNC1H1,SURF4,UVRAG,SLC30A2,PRDX6,NPC2,KXD1
9_Member	GO Cellular Components	GO:0044437	vacuolar part	-2.57823	-0.172411	7/585	1778,6836,7405,7780,9588,10577,79036	DYNC1H1,SURF4,UVRAG,SLC30A2,PRDX6,NPC2,KXD1
9_Member	GO Cellular Components	GO:0035578	azurophil granule lumen	-2.51091	-0.141438	3/91	1778,9588,10577	DYNC1H1,PRDX6,NPC2
9_Member	GO Biological Processes	GO:0048193	Golgi vesicle transport	-2.13383	0	5/380	1778,6836,7405,8724,51128	DYNC1H1,SURF4,UVRAG,SNX3,SAR1B
10_Summary	GO Biological Processes	GO:0016925	protein sumoylation	-2.63927	-0.208046	3/82	11315,53335,54552,987,3094,10152,51094,56940,151195	PARK7,BCL11A,GNL3L,LRBA,HINT1,ABI2,ADIPOR1,DUSP22,CCNYL1
10_Member	GO Biological Processes	GO:0016925	protein sumoylation	-2.63927	-0.208046	3/82	11315,53335,54552	PARK7,BCL11A,GNL3L
10_Member	GO Molecular Functions	GO:0019900	kinase binding	-2.55743	-0.162502	8/754	987,3094,10152,11315,51094,53335,56940,151195	LRBA,HINT1,ABI2,PARK7,ADIPOR1,BCL11A,DUSP22,CCNYL1
11_Summary	GO Biological Processes	GO:0021953	central nervous system neuron differentiation	-2.46206	-0.107391	4/194	6423,84871,113246,266727	SFRP2,AGBL4,C12orf57,MDGA1
11_Member	GO Biological Processes	GO:0021953	central nervous system neuron differentiation	-2.46206	-0.107391	4/194	6423,84871,113246,266727	SFRP2,AGBL4,C12orf57,MDGA1
12_Summary	GO Biological Processes	GO:0045664	regulation of neuron differentiation	-2.24036	0	7/675	5915,6423,8724,9314,10152,53335,57520,3720,51094	RARB,SFRP2,SNX3,KLF4,ABI2,BCL11A,HECW2,JARID2,ADIPOR1
12_Member	GO Biological Processes	GO:0045664	regulation of neuron differentiation	-2.24036	0	7/675	5915,6423,8724,9314,10152,53335,57520	RARB,SFRP2,SNX3,KLF4,ABI2,BCL11A,HECW2
12_Member	GO Biological Processes	GO:0048640	negative regulation of developmental growth	-2.22664	0	3/115	3720,6423,53335	JARID2,SFRP2,BCL11A
12_Member	GO Biological Processes	GO:0010975	regulation of neuron projection development	-2.21044	0	6/517	6423,8724,9314,10152,53335,57520	SFRP2,SNX3,KLF4,ABI2,BCL11A,HECW2
12_Member	GO Biological Processes	GO:0045926	negative regulation of growth	-2.05301	0	4/254	3720,6423,51094,53335	JARID2,SFRP2,ADIPOR1,BCL11A
13_Summary	GO Biological Processes	GO:0045727	positive regulation of translation	-2.02704	0	3/136	6191,8664,84881	RPS4X,EIF3D,RPUSD4
13_Member	GO Biological Processes	GO:0045727	positive regulation of translation	-2.02704	0	3/136	6191,8664,84881	RPS4X,EIF3D,RPUSD4
