# Supplementary material for: One potential biomarker for teratozoospermia identified by in-depth integrative analysis of multiple microarray data
Source: Aging (Albany NY). 2021 Mar 26;13(7):10208–24. doi: 10.18632/aging.202781 (PMC8064145; doi:10.18632/aging.202781)
Supplement: Supplementary Table 3 [file aging-13-202781-s004.xls]

## Sheet: output_identify_20201016105209
Supplementary Table 3. The KEGG enrichment analysis summary table based on 89 common DEGs.
##Databases: KEGG PATHWAY, Gene Ontology Slim
##Statistical test method: hypergeometric test / Fisher's exact test
##FDR correction method: Benjamini and Hochberg
#Term	Database	ID	Input number	Background number	P-Value	Corrected P-Value	Input	Hyperlink
Ribosome	KEGG PATHWAY	hsa03010	10	153	1.27842e-13	1.19021e-10	RPS10|RPL29|RPL24|RPL27|RPS18|RPL32|RPL31|RPS5|RPL35|RPS4X	http://www.genome.jp/kegg-bin/show_pathway?hsa03010/hsa:6193%09red/hsa:6204%09red/hsa:6155%09red/hsa:6159%09red/hsa:11224%09red/hsa:6222%09red/hsa:6160%09red/hsa:6161%09red/hsa:6191%09red/hsa:51187%09red
Huntington disease	KEGG PATHWAY	hsa05016	5	193	1.65253e-05	0.00256418	NDUFA4|POLR2F|CREB5|IFT57|COX7C	http://www.genome.jp/kegg-bin/show_pathway?hsa05016/hsa:55081%09red/hsa:4697%09red/hsa:1350%09red/hsa:9586%09red/hsa:5435%09red
Thermogenesis	KEGG PATHWAY	hsa04714	4	231	0.000542548	0.0240529	NDUFA4|CREB5|COX16|COX7C	http://www.genome.jp/kegg-bin/show_pathway?hsa04714/hsa:4697%09red/hsa:9586%09red/hsa:51241%09red/hsa:1350%09red
Parkinson disease	KEGG PATHWAY	hsa05012	3	142	0.00160564	0.0427099	NDUFA4|PARK7|COX7C	http://www.genome.jp/kegg-bin/show_pathway?hsa05012/hsa:11315%09red/hsa:4697%09red/hsa:1350%09red
Non-alcoholic fatty liver disease (NAFLD)	KEGG PATHWAY	hsa04932	3	149	0.00183674	0.0450001	NDUFA4|COX7C|ADIPOR1	http://www.genome.jp/kegg-bin/show_pathway?hsa04932/hsa:4697%09red/hsa:1350%09red/hsa:51094%09red
Vasopressin-regulated water reabsorption	KEGG PATHWAY	hsa04962	2	44	0.00243357	0.0526896	CREB5|DYNC1H1	http://www.genome.jp/kegg-bin/show_pathway?hsa04962/hsa:1778%09red/hsa:9586%09red
Proteasome	KEGG PATHWAY	hsa03050	2	45	0.00253913	0.0537256	PSMA7|PSMB1	http://www.genome.jp/kegg-bin/show_pathway?hsa03050/hsa:5689%09red/hsa:5688%09red
Cholesterol metabolism	KEGG PATHWAY	hsa04979	2	50	0.00309871	0.057698	DBI|NPC2	http://www.genome.jp/kegg-bin/show_pathway?hsa04979/hsa:706%09red/hsa:10577%09red
Retinol metabolism	KEGG PATHWAY	hsa00830	2	67	0.00538795	0.0771721	CYP4A11|DHRS3	http://www.genome.jp/kegg-bin/show_pathway?hsa00830/hsa:9249%09red/hsa:1579%09red
Metabolic pathways	KEGG PATHWAY	hsa01100	7	1433	0.00780693	0.0953323	NDUFA4|CYP4A11|PRDX6|DHRS3|MTMR4|FDFT1|COX7C	http://www.genome.jp/kegg-bin/show_pathway?hsa01100/hsa:9249%09red/hsa:1350%09red/hsa:9588%09red/hsa:4697%09red/hsa:2222%09red/hsa:1579%09red/hsa:9110%09red
Longevity regulating pathway	KEGG PATHWAY	hsa04211	2	89	0.00919628	0.0974384	CREB5|ADIPOR1	http://www.genome.jp/kegg-bin/show_pathway?hsa04211/hsa:51094%09red/hsa:9586%09red
AMPK signaling pathway	KEGG PATHWAY	hsa04152	2	120	0.0160619	0.108359	CREB5|ADIPOR1	http://www.genome.jp/kegg-bin/show_pathway?hsa04152/hsa:51094%09red/hsa:9586%09red
Autophagy - animal	KEGG PATHWAY	hsa04140	2	128	0.0180993	0.110574	MTMR4|UVRAG	http://www.genome.jp/kegg-bin/show_pathway?hsa04140/hsa:7405%09red/hsa:9110%09red
Oxidative phosphorylation	KEGG PATHWAY	hsa00190	2	133	0.0194254	0.112571	NDUFA4|COX7C	http://www.genome.jp/kegg-bin/show_pathway?hsa00190/hsa:4697%09red/hsa:1350%09red
Signaling pathways regulating pluripotency of stem cells	KEGG PATHWAY	hsa04550	2	140	0.0213482	0.116229	KLF4|JARID2	http://www.genome.jp/kegg-bin/show_pathway?hsa04550/hsa:9314%09red/hsa:3720%09red
Alzheimer disease	KEGG PATHWAY	hsa05010	2	171	0.0307494	0.135222	NDUFA4|COX7C	http://www.genome.jp/kegg-bin/show_pathway?hsa05010/hsa:4697%09red/hsa:1350%09red
Steroid biosynthesis	KEGG PATHWAY	hsa00100	1	19	0.0310821	0.135222	FDFT1	http://www.genome.jp/kegg-bin/show_pathway?hsa00100/hsa:2222%09red
Viral carcinogenesis	KEGG PATHWAY	hsa05203	2	201	0.0411154	0.151898	CREB5|RBL2	http://www.genome.jp/kegg-bin/show_pathway?hsa05203/hsa:5934%09red/hsa:9586%09red
Human T-cell leukemia virus 1 infection	KEGG PATHWAY	hsa05166	2	219	0.0478776	0.1615	DBI|CREB5	http://www.genome.jp/kegg-bin/show_pathway?hsa05166/hsa:706%09red/hsa:9586%09red
RNA polymerase	KEGG PATHWAY	hsa03020	1	31	0.0492708	0.16495	POLR2F	http://www.genome.jp/kegg-bin/show_pathway?hsa03020/hsa:5435%09red
Primary immunodeficiency	KEGG PATHWAY	hsa05340	1	37	0.0582382	0.179536	RFX5	http://www.genome.jp/kegg-bin/show_pathway?hsa05340/hsa:5993%09red
Fatty acid degradation	KEGG PATHWAY	hsa00071	1	44	0.0685944	0.195295	CYP4A11	http://www.genome.jp/kegg-bin/show_pathway?hsa00071/hsa:1579%09red
Hedgehog signaling pathway	KEGG PATHWAY	hsa04340	1	47	0.0729982	0.20287	IHH	http://www.genome.jp/kegg-bin/show_pathway?hsa04340/hsa:3549%09red
Cocaine addiction	KEGG PATHWAY	hsa05030	1	49	0.0759227	0.205588	CREB5	http://www.genome.jp/kegg-bin/show_pathway?hsa05030/hsa:9586%09red
Legionellosis	KEGG PATHWAY	hsa05134	1	55	0.0846414	0.214134	SAR1B	http://www.genome.jp/kegg-bin/show_pathway?hsa05134/hsa:51128%09red
Arachidonic acid metabolism	KEGG PATHWAY	hsa00590	1	63	0.09614	0.230686	CYP4A11	http://www.genome.jp/kegg-bin/show_pathway?hsa00590/hsa:1579%09red
Cytosolic DNA-sensing pathway	KEGG PATHWAY	hsa04623	1	63	0.09614	0.230686	POLR2F	http://www.genome.jp/kegg-bin/show_pathway?hsa04623/hsa:5435%09red
Human papillomavirus infection	KEGG PATHWAY	hsa05165	2	330	0.0969027	0.231919	CREB5|RBL2	http://www.genome.jp/kegg-bin/show_pathway?hsa05165/hsa:5934%09red/hsa:9586%09red
Cortisol synthesis and secretion	KEGG PATHWAY	hsa04927	1	65	0.0989922	0.234508	CREB5	http://www.genome.jp/kegg-bin/show_pathway?hsa04927/hsa:9586%09red
Non-small cell lung cancer	KEGG PATHWAY	hsa05223	1	66	0.100415	0.237275	RARB	http://www.genome.jp/kegg-bin/show_pathway?hsa05223/hsa:5915%09red
Amphetamine addiction	KEGG PATHWAY	hsa05031	1	68	0.103254	0.24214	CREB5	http://www.genome.jp/kegg-bin/show_pathway?hsa05031/hsa:9586%09red
Adipocytokine signaling pathway	KEGG PATHWAY	hsa04920	1	69	0.10467	0.243012	ADIPOR1	http://www.genome.jp/kegg-bin/show_pathway?hsa04920/hsa:51094%09red
RIG-I-like receptor signaling pathway	KEGG PATHWAY	hsa04622	1	70	0.106084	0.245072	IFNE	http://www.genome.jp/kegg-bin/show_pathway?hsa04622/hsa:338376%09red
PI3K-Akt signaling pathway	KEGG PATHWAY	hsa04151	2	354	0.108836	0.248959	CREB5|RBL2	http://www.genome.jp/kegg-bin/show_pathway?hsa04151/hsa:5934%09red/hsa:9586%09red
Inositol phosphate metabolism	KEGG PATHWAY	hsa00562	1	74	0.111718	0.252794	MTMR4	http://www.genome.jp/kegg-bin/show_pathway?hsa00562/hsa:9110%09red
Thyroid hormone synthesis	KEGG PATHWAY	hsa04918	1	74	0.111718	0.252794	CREB5	http://www.genome.jp/kegg-bin/show_pathway?hsa04918/hsa:9586%09red
PPAR signaling pathway	KEGG PATHWAY	hsa03320	1	76	0.114521	0.255682	CYP4A11	http://www.genome.jp/kegg-bin/show_pathway?hsa03320/hsa:1579%09red
Antigen processing and presentation	KEGG PATHWAY	hsa04612	1	77	0.11592	0.256956	RFX5	http://www.genome.jp/kegg-bin/show_pathway?hsa04612/hsa:5993%09red
Salmonella infection	KEGG PATHWAY	hsa05132	1	83	0.124265	0.269676	DYNC1H1	http://www.genome.jp/kegg-bin/show_pathway?hsa05132/hsa:1778%09red
Cardiac muscle contraction	KEGG PATHWAY	hsa04260	1	86	0.128409	0.274194	COX7C	http://www.genome.jp/kegg-bin/show_pathway?hsa04260/hsa:1350%09red
Insulin secretion	KEGG PATHWAY	hsa04911	1	86	0.128409	0.274194	CREB5	http://www.genome.jp/kegg-bin/show_pathway?hsa04911/hsa:9586%09red
mRNA surveillance pathway	KEGG PATHWAY	hsa03015	1	91	0.135272	0.284927	CPSF2	http://www.genome.jp/kegg-bin/show_pathway?hsa03015/hsa:53981%09red
Small cell lung cancer	KEGG PATHWAY	hsa05222	1	93	0.138002	0.288718	RARB	http://www.genome.jp/kegg-bin/show_pathway?hsa05222/hsa:5915%09red
Prostate cancer	KEGG PATHWAY	hsa05215	1	97	0.143436	0.295441	CREB5	http://www.genome.jp/kegg-bin/show_pathway?hsa05215/hsa:9586%09red
Aldosterone synthesis and secretion	KEGG PATHWAY	hsa04925	1	98	0.14479	0.29757	CREB5	http://www.genome.jp/kegg-bin/show_pathway?hsa04925/hsa:9586%09red
Phosphatidylinositol signaling system	KEGG PATHWAY	hsa04070	1	99	0.146141	0.299027	MTMR4	http://www.genome.jp/kegg-bin/show_pathway?hsa04070/hsa:9110%09red
Inflammatory mediator regulation of TRP channels	KEGG PATHWAY	hsa04750	1	100	0.14749	0.300467	CYP4A11	http://www.genome.jp/kegg-bin/show_pathway?hsa04750/hsa:1579%09red
Ribosome biogenesis in eukaryotes	KEGG PATHWAY	hsa03008	1	105	0.154204	0.310745	GNL3L	http://www.genome.jp/kegg-bin/show_pathway?hsa03008/hsa:54552%09red
Glucagon signaling pathway	KEGG PATHWAY	hsa04922	1	106	0.155541	0.311416	CREB5	http://www.genome.jp/kegg-bin/show_pathway?hsa04922/hsa:9586%09red
Parathyroid hormone synthesis, secretion and action	KEGG PATHWAY	hsa04928	1	106	0.155541	0.311416	CREB5	http://www.genome.jp/kegg-bin/show_pathway?hsa04928/hsa:9586%09red
Insulin resistance	KEGG PATHWAY	hsa04931	1	108	0.158208	0.314725	CREB5	http://www.genome.jp/kegg-bin/show_pathway?hsa04931/hsa:9586%09red
Cholinergic synapse	KEGG PATHWAY	hsa04725	1	112	0.163516	0.318481	CREB5	http://www.genome.jp/kegg-bin/show_pathway?hsa04725/hsa:9586%09red
TNF signaling pathway	KEGG PATHWAY	hsa04668	1	112	0.163516	0.318481	CREB5	http://www.genome.jp/kegg-bin/show_pathway?hsa04668/hsa:9586%09red
Lysosome	KEGG PATHWAY	hsa04142	1	123	0.177945	0.336039	NPC2	http://www.genome.jp/kegg-bin/show_pathway?hsa04142/hsa:10577%09red
Cell cycle	KEGG PATHWAY	hsa04110	1	124	0.179245	0.337125	RBL2	http://www.genome.jp/kegg-bin/show_pathway?hsa04110/hsa:5934%09red
Relaxin signaling pathway	KEGG PATHWAY	hsa04926	1	130	0.186999	0.342035	CREB5	http://www.genome.jp/kegg-bin/show_pathway?hsa04926/hsa:9586%09red
Dopaminergic synapse	KEGG PATHWAY	hsa04728	1	131	0.188284	0.343361	CREB5	http://www.genome.jp/kegg-bin/show_pathway?hsa04728/hsa:9586%09red
Vascular smooth muscle contraction	KEGG PATHWAY	hsa04270	1	132	0.189567	0.343361	CYP4A11	http://www.genome.jp/kegg-bin/show_pathway?hsa04270/hsa:1579%09red
FoxO signaling pathway	KEGG PATHWAY	hsa04068	1	132	0.189567	0.343361	RBL2	http://www.genome.jp/kegg-bin/show_pathway?hsa04068/hsa:5934%09red
Estrogen signaling pathway	KEGG PATHWAY	hsa04915	1	138	0.197225	0.353789	CREB5	http://www.genome.jp/kegg-bin/show_pathway?hsa04915/hsa:9586%09red
Retrograde endocannabinoid signaling	KEGG PATHWAY	hsa04723	1	148	0.209829	0.370685	NDUFA4	http://www.genome.jp/kegg-bin/show_pathway?hsa04723/hsa:4697%09red
Adrenergic signaling in cardiomyocytes	KEGG PATHWAY	hsa04261	1	149	0.211079	0.371483	CREB5	http://www.genome.jp/kegg-bin/show_pathway?hsa04261/hsa:9586%09red
Gastric cancer	KEGG PATHWAY	hsa05226	1	149	0.211079	0.371483	RARB	http://www.genome.jp/kegg-bin/show_pathway?hsa05226/hsa:5915%09red
Phagosome	KEGG PATHWAY	hsa04145	1	152	0.214816	0.375223	DYNC1H1	http://www.genome.jp/kegg-bin/show_pathway?hsa04145/hsa:1778%09red
Cushing syndrome	KEGG PATHWAY	hsa04934	1	155	0.218536	0.377471	CREB5	http://www.genome.jp/kegg-bin/show_pathway?hsa04934/hsa:9586%09red
Wnt signaling pathway	KEGG PATHWAY	hsa04310	1	160	0.224696	0.385253	SFRP2	http://www.genome.jp/kegg-bin/show_pathway?hsa04310/hsa:6423%09red
Cellular senescence	KEGG PATHWAY	hsa04218	1	160	0.224696	0.385253	RBL2	http://www.genome.jp/kegg-bin/show_pathway?hsa04218/hsa:5934%09red
Jak-STAT signaling pathway	KEGG PATHWAY	hsa04630	1	162	0.227147	0.388688	IFNE	http://www.genome.jp/kegg-bin/show_pathway?hsa04630/hsa:338376%09red
Hepatitis B	KEGG PATHWAY	hsa05161	1	163	0.22837	0.388688	CREB5	http://www.genome.jp/kegg-bin/show_pathway?hsa05161/hsa:9586%09red
RNA transport	KEGG PATHWAY	hsa03013	1	165	0.230809	0.390697	EIF3D	http://www.genome.jp/kegg-bin/show_pathway?hsa03013/hsa:8664%09red
Protein processing in endoplasmic reticulum	KEGG PATHWAY	hsa04141	1	165	0.230809	0.390697	SAR1B	http://www.genome.jp/kegg-bin/show_pathway?hsa04141/hsa:51128%09red
cGMP-PKG signaling pathway	KEGG PATHWAY	hsa04022	1	167	0.233241	0.391405	CREB5	http://www.genome.jp/kegg-bin/show_pathway?hsa04022/hsa:9586%09red
Tuberculosis	KEGG PATHWAY	hsa05152	1	179	0.247672	0.405955	RFX5	http://www.genome.jp/kegg-bin/show_pathway?hsa05152/hsa:5993%09red
Alcoholism	KEGG PATHWAY	hsa05034	1	180	0.248862	0.407189	CREB5	http://www.genome.jp/kegg-bin/show_pathway?hsa05034/hsa:9586%09red
Proteoglycans in cancer	KEGG PATHWAY	hsa05205	1	203	0.275734	0.436578	IHH	http://www.genome.jp/kegg-bin/show_pathway?hsa05205/hsa:3549%09red
Regulation of actin cytoskeleton	KEGG PATHWAY	hsa04810	1	214	0.288247	0.449012	ABI2	http://www.genome.jp/kegg-bin/show_pathway?hsa04810/hsa:10152%09red
cAMP signaling pathway	KEGG PATHWAY	hsa04024	1	214	0.288247	0.449012	CREB5	http://www.genome.jp/kegg-bin/show_pathway?hsa04024/hsa:9586%09red
Human cytomegalovirus infection	KEGG PATHWAY	hsa05163	1	225	0.300546	0.463259	CREB5	http://www.genome.jp/kegg-bin/show_pathway?hsa05163/hsa:9586%09red
Endocytosis	KEGG PATHWAY	hsa04144	1	244	0.321298	0.483244	SNX3	http://www.genome.jp/kegg-bin/show_pathway?hsa04144/hsa:8724%09red
Cytokine-cytokine receptor interaction	KEGG PATHWAY	hsa04060	1	294	0.373043	0.53679	IFNE	http://www.genome.jp/kegg-bin/show_pathway?hsa04060/hsa:338376%09red
Neuroactive ligand-receptor interaction	KEGG PATHWAY	hsa04080	1	338	0.415339	0.587661	DBI	http://www.genome.jp/kegg-bin/show_pathway?hsa04080/hsa:706%09red
Pathways in cancer	KEGG PATHWAY	hsa05200	1	530	0.569217	0.751689	RARB	http://www.genome.jp/kegg-bin/show_pathway?hsa05200/hsa:5915%09red
--------------------
